# Supplementary material for: Life Cycle Assessment of Mortars with Fine Recycled Aggregates from Industrial Waste: Evaluation of Transports Impact in the Italian Context
Source: MDPI journal article supplement (doi:10.3390/su15043221), 2023-02-09
Supplement: s1 [file s1]

Archive with 3 entries (3 files):
- SI-1 - Local Scenario.pdf
- SI-2 - Transport scenarios.pdf
- Supplementary Material 2.xlsx
