# Supplementary material for: Life Cycle Assessment of Mortars with Fine Recycled Aggregates from Industrial Waste: Evaluation of Transports Impact in the Italian Context
Source: MDPI journal article supplement (doi:10.3390/su15043221), 2023-02-09
Supplement: s1 [file s1 › Supplementary Material 2.xlsx]

## Sheet: RIF2
	Calculation:	Analizza														Calculation:	Analizza																Calculation:	Analizza
	Results:	Valutazione dell'impatto							Scenario SB-1A							Results:	Valutazione dell'impatto							Scenario SB-1A									Results:	Valutazione dell'impatto
	Product:	1 l 0. RIF - Mortar {Europe without Switzerland}| production | APOS, U - A1-A5 (del progetto						Trasporto	RIF							Product:	1 l 0. RIF - Mortar {Europe without Switzerland}| production | APOS, U - A1-A5 (del progetto						Trasporto	RIF									Product:	1 l 0. RIF2 - Mortar {Europe without Switzerland}| production | APOS, U - A1-A5 (del progetto
	Metodo:	EN 15804 +A2 Method V1.00 / EF 3.0 normalization and weighting set						Cemento	60							Metodo:	EN 15804 +A2 Method V1.00 / EF 3.0 normalization and weighting set						Cemento	60									Metodo:	EN 15804 +A2 Method V1.00 / EF 3.0 normalization and weighting set
	Indicatore:	Caratterizzazione						Sabbia	0							Indicatore:	Caratterizzazione						Sabbia	0									Indicatore:	Caratterizzazione
	Skip categories:	Mai							-							Skip categories:	Mai							-									Skip categories:	Con risultato = 0
	Esclude processi di infrastrutture:	No							-							Esclude processi di infrastrutture:	No							-									Esclude processi di infrastrutture:	No
	Esclude le emissioni di lungo termine:	No						Fabbrica-cantiere	50							Esclude le emissioni di lungo termine:	No						Fabbrica-cantiere	500									Esclude le emissioni di lungo termine:	No
	Sorted on item:	Categoria d'impatto							-							Sorted on item:	Categoria d'impatto							-									Sorted on item:	Categoria d'impatto
	Sort order:	Ascendente														Sort order:	Ascendente																Sort order:	Ascendente
	0. RIF - Mortar {Europe without Switzerland}| production | APOS, U - A1-A5		A1		A2		A3				A4	A5		TOT		0. RIF - Mortar {Europe without Switzerland}| production | APOS, U - A1-A5		A1		A2		A3				A4	A5		TOT				0. RIF - Mortar {Europe without Switzerland}| production | APOS, U - A1-A5		A1		A2		A3				A4	A5		TOT
	Categoria d'impatto	Unità	Cement, limestone 6-20% {RoW}| cement production, limestone 6-20% | Cut-off, U	Sand 0/2 mm, wet and dry quarry, production mix, at plant, undried RER S -	T. Cemento_ Transport, freight, lorry, unspecified {RER}| market for transport, freight, lorry, unspecified | APOS, U	T. Sabbia_ Transport, freight, lorry, unspecified {RER}| market for transport, freight, lorry, unspecified | APOS, U	Conveyor belt {GLO}| market for | APOS, U	Industrial machine, heavy, unspecified {RoW}| market for industrial machine, heavy, unspecified | APOS, U	Packing, cement {RoW}| processing | APOS, U	Electricity, medium voltage {IT}| market for | APOS, U	A4_ Transport, freight, lorry, unspecified {RER}| market for transport, freight, lorry, unspecified | APOS, U	A5 - Tap water {Europe without Switzerland}| market for | APOS, U	A5 - Electricity grid mix, AC, consumption mix, at consumer, 230V IT S	Totale		Categoria d'impatto	Unità	Cement, limestone 6-20% {RoW}| cement production, limestone 6-20% | Cut-off, U	Sand 0/2 mm, wet and dry quarry, production mix, at plant, undried RER S -	T. Cemento_ Transport, freight, lorry, unspecified {RER}| market for transport, freight, lorry, unspecified | APOS, U	T. Sabbia_ Transport, freight, lorry, unspecified {RER}| market for transport, freight, lorry, unspecified | APOS, U	Conveyor belt {GLO}| market for | APOS, U	Industrial machine, heavy, unspecified {RoW}| market for industrial machine, heavy, unspecified | APOS, U	Packing, cement {RoW}| processing | APOS, U	Electricity, medium voltage {IT}| market for | APOS, U	A4_ Transport, freight, lorry, unspecified {RER}| market for transport, freight, lorry, unspecified | APOS, U	A5 - Tap water {Europe without Switzerland}| market for | APOS, U	A5 - Electricity grid mix, AC, consumption mix, at consumer, 230V IT S	Totale				Categoria d'impatto	Unità	Cement, limestone 6-20% {RoW}| cement production, limestone 6-20% | Cut-off, U	Sand 0/2 mm, wet and dry quarry, production mix, at plant, undried RER S -	T. Cemento_ Transport, freight, lorry, unspecified {RER}| market for transport, freight, lorry, unspecified | APOS, U	T. Sabbia_ Transport, freight, lorry, unspecified {RER}| market for transport, freight, lorry, unspecified | APOS, U	Conveyor belt {GLO}| market for | APOS, U	Industrial machine, heavy, unspecified {RoW}| market for industrial machine, heavy, unspecified | APOS, U	Packing, cement {RoW}| processing | APOS, U	Electricity, medium voltage {IT}| market for | APOS, U	A4_ Transport, freight, lorry, unspecified {RER}| market for transport, freight, lorry, unspecified | APOS, U	A5 - Tap water {Europe without Switzerland}| market for | APOS, U	A5 - Electricity grid mix, AC, consumption mix, at consumer, 230V IT S	Totale
	Climate change	kg CO2 eq	0.333981	0.00333406	0.00357402	0	4.25953e-05	1.60247e-05	0.0101208	0.0137938	0.0119134	0.000108248	0.0427702	0.419654		Climate change	kg CO2 eq	0.333981	0.00333406	0.00357402	0	4.25953e-05	1.60247e-05	0.0101208	0.0137938	0.119134	0.000108248	0.0427702	0.526875				Climate change	kg CO2 eq	0.333981	0.00333406	0.00357402	0	4.25953e-05	1.60247e-05	0.0101208	0.0137938	0.0119134	0.000108248	0.0427702	0.419654
	Ozone depletion	kg CFC11 eq	1.13597e-08	3.96353e-10	8.20615e-10	0	2.40923e-12	1.03759e-12	5.34012e-10	1.91019e-09	2.73538e-09	9.70207e-12	3.75595e-10	1.8145e-08		Ozone depletion	kg CFC11 eq	1.13597e-08	3.96353e-10	8.20615e-10	0	2.40923e-12	1.03759e-12	5.34012e-10	1.91019e-09	2.73538e-08	9.70207e-12	3.75595e-10	4.27635e-08				Ozone depletion	kg CFC11 eq	1.13597e-08	3.96353e-10	8.20615e-10	0	2.40923e-12	1.03759e-12	5.34012e-10	1.91019e-09	2.73538e-09	9.70207e-12	3.75595e-10	1.8145e-08
	Ionising radiation	kBq U-235 eq	0.00698221	0.000626499	0.000284624	0	2.43097e-06	1.09926e-06	0.000613941	0.0015694	0.000948747	3.62211e-05	0.00169879	0.012764		Ionising radiation	kBq U-235 eq	0.00698221	0.000626499	0.000284624	0	2.43097e-06	1.09926e-06	0.000613941	0.0015694	0.00948747	3.62211e-05	0.00169879	0.0213027				Ionising radiation	kBq U-235 eq	0.00698221	0.000626499	0.000284624	0	2.43097e-06	1.09926e-06	0.000613941	0.0015694	0.000948747	3.62211e-05	0.00169879	0.012764
	Photochemical ozone formation	kg NMVOC eq	0.000797007	2.35428e-05	2.27668e-05	0	1.60315e-07	7.20811e-08	3.8188e-05	2.92679e-05	7.58893e-05	3.35084e-07	5.92739e-05	0.0010465		Photochemical ozone formation	kg NMVOC eq	0.000797007	2.35428e-05	2.27668e-05	0	1.60315e-07	7.20811e-08	3.8188e-05	2.92679e-05	0.000758893	3.35084e-07	5.92739e-05	0.00172951				Photochemical ozone formation	kg NMVOC eq	0.000797007	2.35428e-05	2.27668e-05	0	1.60315e-07	7.20811e-08	3.8188e-05	2.92679e-05	7.58893e-05	3.35084e-07	5.92739e-05	0.0010465
	Particulate matter	disease inc.	6.91278e-09	3.57624e-10	3.23241e-10	0	3.39854e-12	1.42359e-12	2.47316e-09	2.44889e-10	1.07747e-09	5.54085e-12	8.61566e-10	1.22611e-08		Particulate matter	disease inc.	6.91278e-09	3.57624e-10	3.23241e-10	0	3.39854e-12	1.42359e-12	2.47316e-09	2.44889e-10	1.07747e-08	5.54085e-12	8.61566e-10	2.19583e-08				Particulate matter	disease inc.	6.91278e-09	3.57624e-10	3.23241e-10	0	3.39854e-12	1.42359e-12	2.47316e-09	2.44889e-10	1.07747e-09	5.54085e-12	8.61566e-10	1.22611e-08
	Human toxicity, non-cancer	CTUh	2.55769e-09	1.22523e-11	5.22336e-11	0	3.37519e-12	1.94015e-12	2.07622e-10	7.86455e-11	1.74112e-10	6.27242e-12	6.37921e-11	3.15794e-09		Human toxicity, non-cancer	CTUh	2.55769e-09	1.22523e-11	5.22336e-11	0	3.37519e-12	1.94015e-12	2.07622e-10	7.86455e-11	1.74112e-09	6.27242e-12	6.37921e-11	4.72494e-09				Human toxicity, non-cancer	CTUh	2.55769e-09	1.22523e-11	5.22336e-11	0	3.37519e-12	1.94015e-12	2.07622e-10	7.86455e-11	1.74112e-10	6.27242e-12	6.37921e-11	3.15794e-09
	Human toxicity, cancer	CTUh	6.65378e-11	2.13253e-13	1.42809e-12	0	2.5824e-13	1.0341e-13	1.94695e-11	2.78301e-12	4.76028e-12	2.47365e-13	3.71755e-12	9.95185e-11		Human toxicity, cancer	CTUh	6.65378e-11	2.13253e-13	1.42809e-12	0	2.5824e-13	1.0341e-13	1.94695e-11	2.78301e-12	4.76028e-11	2.47365e-13	3.71755e-12	1.42361e-10				Human toxicity, cancer	CTUh	6.65378e-11	2.13253e-13	1.42809e-12	0	2.5824e-13	1.0341e-13	1.94695e-11	2.78301e-12	4.76028e-12	2.47365e-13	3.71755e-12	9.95185e-11
	Acidification	mol H+ eq	0.000993823	3.20036e-05	2.02544e-05	0	1.87976e-07	1.26133e-07	3.88234e-05	6.39752e-05	6.75148e-05	5.96975e-07	0.000107222	0.00132453		Acidification	mol H+ eq	0.000993823	3.20036e-05	2.02544e-05	0	1.87976e-07	1.26133e-07	3.88234e-05	6.39752e-05	0.000675148	5.96975e-07	0.000107222	0.00193216				Acidification	mol H+ eq	0.000993823	3.20036e-05	2.02544e-05	0	1.87976e-07	1.26133e-07	3.88234e-05	6.39752e-05	6.75148e-05	5.96975e-07	0.000107222	0.00132453
	Eutrophication, freshwater	kg P eq	4.20676e-05	7.46529e-10	2.6806e-07	0	2.32083e-08	1.44762e-08	2.36462e-06	3.56998e-06	8.93532e-07	7.5658e-08	2.02095e-09	4.92799e-05		Eutrophication, freshwater	kg P eq	4.20676e-05	7.46529e-10	2.6806e-07	0	2.32083e-08	1.44762e-08	2.36462e-06	3.56998e-06	8.93532e-06	7.5658e-08	2.02095e-09	5.73217e-05				Eutrophication, freshwater	kg P eq	4.20676e-05	7.46529e-10	2.6806e-07	0	2.32083e-08	1.44762e-08	2.36462e-06	3.56998e-06	8.93532e-07	7.5658e-08	2.02095e-09	4.92799e-05
	Eutrophication, marine	kg N eq	0.000283873	8.00089e-06	7.30762e-06	0	4.25411e-08	1.96117e-08	1.7325e-05	1.00239e-05	2.43587e-05	1.15904e-07	1.90314e-05	0.000370099		Eutrophication, marine	kg N eq	0.000283873	8.00089e-06	7.30762e-06	0	4.25411e-08	1.96117e-08	1.7325e-05	1.00239e-05	0.000243587	1.15904e-07	1.90314e-05	0.000589328				Eutrophication, marine	kg N eq	0.000283873	8.00089e-06	7.30762e-06	0	4.25411e-08	1.96117e-08	1.7325e-05	1.00239e-05	2.43587e-05	1.15904e-07	1.90314e-05	0.000370099
	Eutrophication, terrestrial	mol N eq	0.00321064	8.75376e-05	7.98747e-05	0	4.16343e-07	2.05008e-07	0.00011213	0.000110331	0.000266249	1.08649e-06	0.000209191	0.00407766		Eutrophication, terrestrial	mol N eq	0.00321064	8.75376e-05	7.98747e-05	0	4.16343e-07	2.05008e-07	0.00011213	0.000110331	0.00266249	1.08649e-06	0.000209191	0.0064739				Eutrophication, terrestrial	mol N eq	0.00321064	8.75376e-05	7.98747e-05	0	4.16343e-07	2.05008e-07	0.00011213	0.000110331	0.000266249	1.08649e-06	0.000209191	0.00407766
	Ecotoxicity, freshwater	CTUe	4.60969	0.0128769	0.0443323	0	0.00145446	0.00105349	2.80096	0.2143	0.147774	0.00205111	0.168116	8.00261		Ecotoxicity, freshwater	CTUe	4.60969	0.0128769	0.0443323	0	0.00145446	0.00105349	2.80096	0.2143	1.47774	0.00205111	0.168116	9.33258				Ecotoxicity, freshwater	CTUe	4.60969	0.0128769	0.0443323	0	0.00145446	0.00105349	2.80096	0.2143	0.147774	0.00205111	0.168116	8.00261
	Land use	Pt	1.02996	0	0.0628542	0	0.00112114	0.000676069	1.5399	0.340344	0.209514	0.00169745	0.0032731	3.18934		Land use	Pt	1.02996	0	0.0628542	0	0.00112114	0.000676069	1.5399	0.340344	2.09514	0.00169745	0.0032731	5.07497				Land use	Pt	1.02996	0	0.0628542	0	0.00112114	0.000676069	1.5399	0.340344	0.209514	0.00169745	0.0032731	3.18934
	Water use	m3 depriv.	0.0155889	0.000242583	0.000180976	0	1.86864e-05	7.06333e-06	0.00683902	0.0100199	0.000603252	0.0129312	0.0286051	0.0750366		Water use	m3 depriv.	0.0155889	0.000242583	0.000180976	0	1.86864e-05	7.06333e-06	0.00683902	0.0100199	0.00603252	0.0129312	0.0286051	0.0804659				Water use	m3 depriv.	0.0155889	0.000242583	0.000180976	0	1.86864e-05	7.06333e-06	0.00683902	0.0100199	0.000603252	0.0129312	0.0286051	0.0750366
	Resource use, fossils	MJ	1.55101	0.0570464	0.0544854	0	0.000408843	0.000159496	0.0859621	0.187158	0.181618	0.00173743	0.595339	2.71493		Resource use, fossils	MJ	1.55101	0.0570464	0.0544854	0	0.000408843	0.000159496	0.0859621	0.187158	1.81618	0.00173743	0.595339	4.34949				Resource use, fossils	MJ	1.55101	0.0570464	0.0544854	0	0.000408843	0.000159496	0.0859621	0.187158	0.181618	0.00173743	0.595339	2.71493
	Resource use, minerals and metals	kg Sb eq	2.31856e-05	9.86731e-11	8.37666e-08	0	1.5435e-09	8.13928e-10	9.75947e-08	3.94865e-08	2.79222e-07	3.08679e-09	3.73648e-09	2.3695e-05		Resource use, minerals and metals	kg Sb eq	2.31856e-05	9.86731e-11	8.37666e-08	0	1.5435e-09	8.13928e-10	9.75947e-08	3.94865e-08	2.79222e-06	3.08679e-09	3.73648e-09	2.6208e-05				Resource use, minerals and metals	kg Sb eq	2.31856e-05	9.86731e-11	8.37666e-08	0	1.5435e-09	8.13928e-10	9.75947e-08	3.94865e-08	2.79222e-07	3.08679e-09	3.73648e-09	2.3695e-05
	Climate change - Fossil	kg CO2 eq	0.330701	0.00337243	0.00357078	0	4.24758e-05	1.59886e-05	0.00556468	0.0125335	0.0119026	0.000105634	0.0428314	0.410641		Climate change - Fossil	kg CO2 eq	0.330701	0.00337243	0.00357078	0	4.24758e-05	1.59886e-05	0.00556468	0.0125335	0.119026	0.000105634	0.0428314	0.517764				Climate change - Fossil	kg CO2 eq	0.330701	0.00337243	0.00357078	0	4.24758e-05	1.59886e-05	0.00556468	0.0125335	0.0119026	0.000105634	0.0428314	0.410641
	Climate change - Biogenic	kg CO2 eq	0.00317501	-3.8366e-05	1.83661e-06	0	1.25274e-08	-7.11704e-09	0.00452275	0.00124799	6.12204e-06	2.4169e-06	-6.12064e-05	0.00885656		Climate change - Biogenic	kg CO2 eq	0.00317501	-3.8366e-05	1.83661e-06	0	1.25274e-08	-7.11704e-09	0.00452275	0.00124799	6.12204e-05	2.4169e-06	-6.12064e-05	0.00891165				Climate change - Biogenic	kg CO2 eq	0.00317501	-3.8366e-05	1.83661e-06	0	1.25274e-08	-7.11704e-09	0.00452275	0.00124799	6.12204e-06	2.4169e-06	-6.12064e-05	0.00885656
	Climate change - Land use and LU change	kg CO2 eq	0.000105076	0	1.39574e-06	0	1.07024e-07	4.31495e-08	3.34016e-05	1.22948e-05	4.65248e-06	1.96648e-07	0	0.000157167		Climate change - Land use and LU change	kg CO2 eq	0.000105076	0	1.39574e-06	0	1.07024e-07	4.31495e-08	3.34016e-05	1.22948e-05	4.65248e-05	1.96648e-07	0	0.00019904				Climate change - Land use and LU change	kg CO2 eq	0.000105076	0	1.39574e-06	0	1.07024e-07	4.31495e-08	3.34016e-05	1.22948e-05	4.65248e-06	1.96648e-07	0	0.000157167
	Human toxicity, non-cancer - organics	CTUh	3.75683e-11	1.24483e-13	5.90864e-12	0	5.95903e-14	5.63053e-14	2.06811e-11	2.65288e-12	1.96955e-11	3.16409e-14	3.42499e-13	8.71209e-11		Human toxicity, non-cancer - organics	CTUh	3.75683e-11	1.24483e-13	5.90864e-12	0	5.95903e-14	5.63053e-14	2.06811e-11	2.65288e-12	1.96955e-10	3.16409e-14	3.42499e-13	2.6438e-10				Human toxicity, non-cancer - organics	CTUh	3.75683e-11	1.24483e-13	5.90864e-12	0	5.95903e-14	5.63053e-14	2.06811e-11	2.65288e-12	1.96955e-11	3.16409e-14	3.42499e-13	8.71209e-11
	Human toxicity, non-cancer - inorganics	CTUh	3.84349e-10	4.08815e-12	1.00641e-11	0	4.65776e-13	1.78073e-13	6.33743e-11	1.13768e-11	3.35469e-11	5.6557e-13	2.16605e-11	5.29669e-10		Human toxicity, non-cancer - inorganics	CTUh	3.84349e-10	4.08815e-12	1.00641e-11	0	4.65776e-13	1.78073e-13	6.33743e-11	1.13768e-11	3.35469e-10	5.6557e-13	2.16605e-11	8.31591e-10				Human toxicity, non-cancer - inorganics	CTUh	3.84349e-10	4.08815e-12	1.00641e-11	0	4.65776e-13	1.78073e-13	6.33743e-11	1.13768e-11	3.35469e-11	5.6557e-13	2.16605e-11	5.29669e-10
	Human toxicity, non-cancer - metals	CTUh	2.14731e-09	8.0397e-12	3.63706e-11	0	2.85397e-12	1.70737e-12	1.24214e-10	6.60075e-11	1.21235e-10	5.68413e-12	4.1789e-11	2.55521e-09		Human toxicity, non-cancer - metals	CTUh	2.14731e-09	8.0397e-12	3.63706e-11	0	2.85397e-12	1.70737e-12	1.24214e-10	6.60075e-11	1.21235e-09	5.68413e-12	4.1789e-11	3.64633e-09				Human toxicity, non-cancer - metals	CTUh	2.14731e-09	8.0397e-12	3.63706e-11	0	2.85397e-12	1.70737e-12	1.24214e-10	6.60075e-11	1.21235e-10	5.68413e-12	4.1789e-11	2.55521e-09
	Human toxicity, cancer - organics	CTUh	3.3895e-11	1.04426e-13	8.40716e-13	0	6.84336e-14	2.63517e-14	1.64289e-11	1.09191e-12	2.80239e-12	8.36478e-14	2.09663e-12	5.74383e-11		Human toxicity, cancer - organics	CTUh	3.3895e-11	1.04426e-13	8.40716e-13	0	6.84336e-14	2.63517e-14	1.64289e-11	1.09191e-12	2.80239e-11	8.36478e-14	2.09663e-12	8.26598e-11				Human toxicity, cancer - organics	CTUh	3.3895e-11	1.04426e-13	8.40716e-13	0	6.84336e-14	2.63517e-14	1.64289e-11	1.09191e-12	2.80239e-12	8.36478e-14	2.09663e-12	5.74383e-11
	Human toxicity, cancer - inorganics	CTUh	0	0	7.28961e-21	0	2.18973e-22	8.35363e-23	5.36536e-20	2.52748e-20	2.42987e-20	4.69048e-22	0	1.11288e-19		Human toxicity, cancer - inorganics	CTUh	0	0	7.28961e-21	0	2.18973e-22	8.35363e-23	5.36536e-20	2.52748e-20	2.42987e-19	4.69048e-22	0	3.29976e-19				Human toxicity, cancer - inorganics	CTUh	0	0	7.28961e-21	0	2.18973e-22	8.35363e-23	5.36536e-20	2.52748e-20	2.42987e-20	4.69048e-22	0	1.11288e-19
	Human toxicity, cancer - metals	CTUh	3.26428e-11	1.08827e-13	5.87369e-13	0	1.89807e-13	7.70585e-14	3.04065e-12	1.6911e-12	1.9579e-12	1.63717e-13	1.62092e-12	4.20802e-11		Human toxicity, cancer - metals	CTUh	3.26428e-11	1.08827e-13	5.87369e-13	0	1.89807e-13	7.70585e-14	3.04065e-12	1.6911e-12	1.9579e-11	1.63717e-13	1.62092e-12	5.97012e-11				Human toxicity, cancer - metals	CTUh	3.26428e-11	1.08827e-13	5.87369e-13	0	1.89807e-13	7.70585e-14	3.04065e-12	1.6911e-12	1.9579e-12	1.63717e-13	1.62092e-12	4.20802e-11
	Ecotoxicity, freshwater - organics	CTUe	0.0413495	9.88623e-05	0.00325729	0	1.46986e-05	8.96591e-06	0.00859909	0.0022292	0.0108576	3.52606e-05	0.000426527	0.066877		Ecotoxicity, freshwater - organics	CTUe	0.0413495	9.88623e-05	0.00325729	0	1.46986e-05	8.96591e-06	0.00859909	0.0022292	0.108576	3.52606e-05	0.000426527	0.164596				Ecotoxicity, freshwater - organics	CTUe	0.0413495	9.88623e-05	0.00325729	0	1.46986e-05	8.96591e-06	0.00859909	0.0022292	0.0108576	3.52606e-05	0.000426527	0.066877
	Ecotoxicity, freshwater - inorganics	CTUe	0.267384	0.00361191	0.0114607	0	0.00011231	8.2116e-05	0.0200225	0.0130356	0.0382023	0.0001829	0.13538	0.489474		Ecotoxicity, freshwater - inorganics	CTUe	0.267384	0.00361191	0.0114607	0	0.00011231	8.2116e-05	0.0200225	0.0130356	0.382023	0.0001829	0.13538	0.833295				Ecotoxicity, freshwater - inorganics	CTUe	0.267384	0.00361191	0.0114607	0	0.00011231	8.2116e-05	0.0200225	0.0130356	0.0382023	0.0001829	0.13538	0.489474
	Ecotoxicity, freshwater - metals	CTUe	4.30095	0.00916618	0.0296143	0	0.00132745	0.000962412	2.77234	0.199035	0.0987143	0.00183295	0.0323089	7.44626		Ecotoxicity, freshwater - metals	CTUe	4.30095	0.00916618	0.0296143	0	0.00132745	0.000962412	2.77234	0.199035	0.987143	0.00183295	0.0323089	8.33469				Ecotoxicity, freshwater - metals	CTUe	4.30095	0.00916618	0.0296143	0	0.00132745	0.000962412	2.77234	0.199035	0.0987143	0.00183295	0.0323089	7.44626
	Calculation:	Analizza														Calculation:	Analizza								Scenario SB-1A
	Results:	Valutazione dell'impatto							Scenario SB-1A							Results:	Valutazione dell'impatto							Trasporto	RIF
	Product:	1 l 0. RIF - Mortar {Europe without Switzerland}| production | APOS, U - A1-A5 (del progetto						Trasporto	RIF							Product:	1 l 0. RIF - Mortar {Europe without Switzerland}| production | APOS, U - A1-A5 (del progetto							Cemento	60
	Metodo:	EN 15804 +A2 Method V1.00 / EF 3.0 normalization and weighting set						Cemento	60							Metodo:	EN 15804 +A2 Method V1.00 / EF 3.0 normalization and weighting set							Sabbia	100
	Indicatore:	Caratterizzazione						Sabbia	100							Indicatore:	Caratterizzazione								-
	Skip categories:	Mai							-							Skip categories:	Mai								-
	Esclude processi di infrastrutture:	No							-							Esclude processi di infrastrutture:	No							Fabbrica-cantiere	500
	Esclude le emissioni di lungo termine:	No						Fabbrica-cantiere	50							Esclude le emissioni di lungo termine:	No								-
	Sorted on item:	Categoria d'impatto							-							Sorted on item:	Categoria d'impatto
	Sort order:	Ascendente														Sort order:	Ascendente
	0. RIF - Mortar {Europe without Switzerland}| production | APOS, U - A1-A5		A1		A2		A3				A4	A5		TOT		0. RIF - Mortar {Europe without Switzerland}| production | APOS, U - A1-A5		A1		A2		A3				A4	A5		TOT
	Categoria d'impatto	Unità	Cement, limestone 6-20% {RoW}| cement production, limestone 6-20% | Cut-off, U	Sand 0/2 mm, wet and dry quarry, production mix, at plant, undried RER S -	T. Cemento_ Transport, freight, lorry, unspecified {RER}| market for transport, freight, lorry, unspecified | APOS, U	T. Sabbia_ Transport, freight, lorry, unspecified {RER}| market for transport, freight, lorry, unspecified | APOS, U	Conveyor belt {GLO}| market for | APOS, U	Industrial machine, heavy, unspecified {RoW}| market for industrial machine, heavy, unspecified | APOS, U	Packing, cement {RoW}| processing | APOS, U	Electricity, medium voltage {IT}| market for | APOS, U	A4_ Transport, freight, lorry, unspecified {RER}| market for transport, freight, lorry, unspecified | APOS, U	A5 - Tap water {Europe without Switzerland}| market for | APOS, U	A5 - Electricity grid mix, AC, consumption mix, at consumer, 230V IT S	Totale		Categoria d'impatto	Unità	Cement, limestone 6-20% {RoW}| cement production, limestone 6-20% | Cut-off, U	Sand 0/2 mm, wet and dry quarry, production mix, at plant, undried RER S -	T. Cemento_ Transport, freight, lorry, unspecified {RER}| market for transport, freight, lorry, unspecified | APOS, U	T. Sabbia_ Transport, freight, lorry, unspecified {RER}| market for transport, freight, lorry, unspecified | APOS, U	Conveyor belt {GLO}| market for | APOS, U	Industrial machine, heavy, unspecified {RoW}| market for industrial machine, heavy, unspecified | APOS, U	Packing, cement {RoW}| processing | APOS, U	Electricity, medium voltage {IT}| market for | APOS, U	A4_ Transport, freight, lorry, unspecified {RER}| market for transport, freight, lorry, unspecified | APOS, U	A5 - Tap water {Europe without Switzerland}| market for | APOS, U	A5 - Electricity grid mix, AC, consumption mix, at consumer, 230V IT S	Totale
	Climate change	kg CO2 eq	0.333981	0.00333406	0.00357402	0.0178701	4.25953e-05	1.60247e-05	0.0101208	0.0137938	0.0119134	0.000108248	0.0427702	0.437525		Climate change	kg CO2 eq	0.333981	0.00333406	0.00357402	0.0178701	4.25953e-05	1.60247e-05	0.0101208	0.0137938	0.119134	0.000108248	0.0427702	0.544745
	Ozone depletion	kg CFC11 eq	1.13597e-08	3.96353e-10	8.20615e-10	4.10308e-09	2.40923e-12	1.03759e-12	5.34012e-10	1.91019e-09	2.73538e-09	9.70207e-12	3.75595e-10	2.22481e-08		Ozone depletion	kg CFC11 eq	1.13597e-08	3.96353e-10	8.20615e-10	4.10308e-09	2.40923e-12	1.03759e-12	5.34012e-10	1.91019e-09	2.73538e-08	9.70207e-12	3.75595e-10	4.68666e-08
	Ionising radiation	kBq U-235 eq	0.00698221	0.000626499	0.000284624	0.00142312	2.43097e-06	1.09926e-06	0.000613941	0.0015694	0.000948747	3.62211e-05	0.00169879	0.0141871		Ionising radiation	kBq U-235 eq	0.00698221	0.000626499	0.000284624	0.00142312	2.43097e-06	1.09926e-06	0.000613941	0.0015694	0.00948747	3.62211e-05	0.00169879	0.0227258
	Photochemical ozone formation	kg NMVOC eq	0.000797007	2.35428e-05	2.27668e-05	0.000113834	1.60315e-07	7.20811e-08	3.8188e-05	2.92679e-05	7.58893e-05	3.35084e-07	5.92739e-05	0.00116034		Photochemical ozone formation	kg NMVOC eq	0.000797007	2.35428e-05	2.27668e-05	0.000113834	1.60315e-07	7.20811e-08	3.8188e-05	2.92679e-05	0.000758893	3.35084e-07	5.92739e-05	0.00184334
	Particulate matter	disease inc.	6.91278e-09	3.57624e-10	3.23241e-10	1.61621e-09	3.39854e-12	1.42359e-12	2.47316e-09	2.44889e-10	1.07747e-09	5.54085e-12	8.61566e-10	1.38773e-08		Particulate matter	disease inc.	6.91278e-09	3.57624e-10	3.23241e-10	1.61621e-09	3.39854e-12	1.42359e-12	2.47316e-09	2.44889e-10	1.07747e-08	5.54085e-12	8.61566e-10	2.35745e-08
	Human toxicity, non-cancer	CTUh	2.55769e-09	1.22523e-11	5.22336e-11	2.61168e-10	3.37519e-12	1.94015e-12	2.07622e-10	7.86455e-11	1.74112e-10	6.27242e-12	6.37921e-11	3.41911e-09		Human toxicity, non-cancer	CTUh	2.55769e-09	1.22523e-11	5.22336e-11	2.61168e-10	3.37519e-12	1.94015e-12	2.07622e-10	7.86455e-11	1.74112e-09	6.27242e-12	6.37921e-11	4.98611e-09
	Human toxicity, cancer	CTUh	6.65378e-11	2.13253e-13	1.42809e-12	7.14043e-12	2.5824e-13	1.0341e-13	1.94695e-11	2.78301e-12	4.76028e-12	2.47365e-13	3.71755e-12	1.06659e-10		Human toxicity, cancer	CTUh	6.65378e-11	2.13253e-13	1.42809e-12	7.14043e-12	2.5824e-13	1.0341e-13	1.94695e-11	2.78301e-12	4.76028e-11	2.47365e-13	3.71755e-12	1.49501e-10
	Acidification	mol H+ eq	0.000993823	3.20036e-05	2.02544e-05	0.000101272	1.87976e-07	1.26133e-07	3.88234e-05	6.39752e-05	6.75148e-05	5.96975e-07	0.000107222	0.0014258		Acidification	mol H+ eq	0.000993823	3.20036e-05	2.02544e-05	0.000101272	1.87976e-07	1.26133e-07	3.88234e-05	6.39752e-05	0.000675148	5.96975e-07	0.000107222	0.00203343
	Eutrophication, freshwater	kg P eq	4.20676e-05	7.46529e-10	2.6806e-07	1.3403e-06	2.32083e-08	1.44762e-08	2.36462e-06	3.56998e-06	8.93532e-07	7.5658e-08	2.02095e-09	5.06202e-05		Eutrophication, freshwater	kg P eq	4.20676e-05	7.46529e-10	2.6806e-07	1.3403e-06	2.32083e-08	1.44762e-08	2.36462e-06	3.56998e-06	8.93532e-06	7.5658e-08	2.02095e-09	5.8662e-05
	Eutrophication, marine	kg N eq	0.000283873	8.00089e-06	7.30762e-06	3.65381e-05	4.25411e-08	1.96117e-08	1.7325e-05	1.00239e-05	2.43587e-05	1.15904e-07	1.90314e-05	0.000406637		Eutrophication, marine	kg N eq	0.000283873	8.00089e-06	7.30762e-06	3.65381e-05	4.25411e-08	1.96117e-08	1.7325e-05	1.00239e-05	0.000243587	1.15904e-07	1.90314e-05	0.000625866
	Eutrophication, terrestrial	mol N eq	0.00321064	8.75376e-05	7.98747e-05	0.000399373	4.16343e-07	2.05008e-07	0.00011213	0.000110331	0.000266249	1.08649e-06	0.000209191	0.00447703		Eutrophication, terrestrial	mol N eq	0.00321064	8.75376e-05	7.98747e-05	0.000399373	4.16343e-07	2.05008e-07	0.00011213	0.000110331	0.00266249	1.08649e-06	0.000209191	0.00687328
	Ecotoxicity, freshwater	CTUe	4.60969	0.0128769	0.0443323	0.221661	0.00145446	0.00105349	2.80096	0.2143	0.147774	0.00205111	0.168116	8.22427		Ecotoxicity, freshwater	CTUe	4.60969	0.0128769	0.0443323	0.221661	0.00145446	0.00105349	2.80096	0.2143	1.47774	0.00205111	0.168116	9.55424
	Land use	Pt	1.02996	0	0.0628542	0.314271	0.00112114	0.000676069	1.5399	0.340344	0.209514	0.00169745	0.0032731	3.50361		Land use	Pt	1.02996	0	0.0628542	0.314271	0.00112114	0.000676069	1.5399	0.340344	2.09514	0.00169745	0.0032731	5.38924
	Water use	m3 depriv.	0.0155889	0.000242583	0.000180976	0.000904878	1.86864e-05	7.06333e-06	0.00683902	0.0100199	0.000603252	0.0129312	0.0286051	0.0759415		Water use	m3 depriv.	0.0155889	0.000242583	0.000180976	0.000904878	1.86864e-05	7.06333e-06	0.00683902	0.0100199	0.00603252	0.0129312	0.0286051	0.0813708
	Resource use, fossils	MJ	1.55101	0.0570464	0.0544854	0.272427	0.000408843	0.000159496	0.0859621	0.187158	0.181618	0.00173743	0.595339	2.98736		Resource use, fossils	MJ	1.55101	0.0570464	0.0544854	0.272427	0.000408843	0.000159496	0.0859621	0.187158	1.81618	0.00173743	0.595339	4.62192
	Resource use, minerals and metals	kg Sb eq	2.31856e-05	9.86731e-11	8.37666e-08	4.18833e-07	1.5435e-09	8.13928e-10	9.75947e-08	3.94865e-08	2.79222e-07	3.08679e-09	3.73648e-09	2.41138e-05		Resource use, minerals and metals	kg Sb eq	2.31856e-05	9.86731e-11	8.37666e-08	4.18833e-07	1.5435e-09	8.13928e-10	9.75947e-08	3.94865e-08	2.79222e-06	3.08679e-09	3.73648e-09	2.66268e-05
	Climate change - Fossil	kg CO2 eq	0.330701	0.00337243	0.00357078	0.0178539	4.24758e-05	1.59886e-05	0.00556468	0.0125335	0.0119026	0.000105634	0.0428314	0.428495		Climate change - Fossil	kg CO2 eq	0.330701	0.00337243	0.00357078	0.0178539	4.24758e-05	1.59886e-05	0.00556468	0.0125335	0.119026	0.000105634	0.0428314	0.535618
	Climate change - Biogenic	kg CO2 eq	0.00317501	-3.8366e-05	1.83661e-06	9.18306e-06	1.25274e-08	-7.11704e-09	0.00452275	0.00124799	6.12204e-06	2.4169e-06	-6.12064e-05	0.00886574		Climate change - Biogenic	kg CO2 eq	0.00317501	-3.8366e-05	1.83661e-06	9.18306e-06	1.25274e-08	-7.11704e-09	0.00452275	0.00124799	6.12204e-05	2.4169e-06	-6.12064e-05	0.00892084
	Climate change - Land use and LU change	kg CO2 eq	0.000105076	0	1.39574e-06	6.97872e-06	1.07024e-07	4.31495e-08	3.34016e-05	1.22948e-05	4.65248e-06	1.96648e-07	0	0.000164146		Climate change - Land use and LU change	kg CO2 eq	0.000105076	0	1.39574e-06	6.97872e-06	1.07024e-07	4.31495e-08	3.34016e-05	1.22948e-05	4.65248e-05	1.96648e-07	0	0.000206018
	Human toxicity, non-cancer - organics	CTUh	3.75683e-11	1.24483e-13	5.90864e-12	2.95432e-11	5.95903e-14	5.63053e-14	2.06811e-11	2.65288e-12	1.96955e-11	3.16409e-14	3.42499e-13	1.16664e-10		Human toxicity, non-cancer - organics	CTUh	3.75683e-11	1.24483e-13	5.90864e-12	2.95432e-11	5.95903e-14	5.63053e-14	2.06811e-11	2.65288e-12	1.96955e-10	3.16409e-14	3.42499e-13	2.93923e-10
	Human toxicity, non-cancer - inorganics	CTUh	3.84349e-10	4.08815e-12	1.00641e-11	5.03203e-11	4.65776e-13	1.78073e-13	6.33743e-11	1.13768e-11	3.35469e-11	5.6557e-13	2.16605e-11	5.79989e-10		Human toxicity, non-cancer - inorganics	CTUh	3.84349e-10	4.08815e-12	1.00641e-11	5.03203e-11	4.65776e-13	1.78073e-13	6.33743e-11	1.13768e-11	3.35469e-10	5.6557e-13	2.16605e-11	8.81912e-10
	Human toxicity, non-cancer - metals	CTUh	2.14731e-09	8.0397e-12	3.63706e-11	1.81853e-10	2.85397e-12	1.70737e-12	1.24214e-10	6.60075e-11	1.21235e-10	5.68413e-12	4.1789e-11	2.73706e-09		Human toxicity, non-cancer - metals	CTUh	2.14731e-09	8.0397e-12	3.63706e-11	1.81853e-10	2.85397e-12	1.70737e-12	1.24214e-10	6.60075e-11	1.21235e-09	5.68413e-12	4.1789e-11	3.82818e-09
	Human toxicity, cancer - organics	CTUh	3.3895e-11	1.04426e-13	8.40716e-13	4.20358e-12	6.84336e-14	2.63517e-14	1.64289e-11	1.09191e-12	2.80239e-12	8.36478e-14	2.09663e-12	6.16419e-11		Human toxicity, cancer - organics	CTUh	3.3895e-11	1.04426e-13	8.40716e-13	4.20358e-12	6.84336e-14	2.63517e-14	1.64289e-11	1.09191e-12	2.80239e-11	8.36478e-14	2.09663e-12	8.68634e-11
	Human toxicity, cancer - inorganics	CTUh	0	0	7.28961e-21	3.6448e-20	2.18973e-22	8.35363e-23	5.36536e-20	2.52748e-20	2.42987e-20	4.69048e-22	0	1.47736e-19		Human toxicity, cancer - inorganics	CTUh	0	0	7.28961e-21	3.6448e-20	2.18973e-22	8.35363e-23	5.36536e-20	2.52748e-20	2.42987e-19	4.69048e-22	0	3.66424e-19
	Human toxicity, cancer - metals	CTUh	3.26428e-11	1.08827e-13	5.87369e-13	2.93684e-12	1.89807e-13	7.70585e-14	3.04065e-12	1.6911e-12	1.9579e-12	1.63717e-13	1.62092e-12	4.5017e-11		Human toxicity, cancer - metals	CTUh	3.26428e-11	1.08827e-13	5.87369e-13	2.93684e-12	1.89807e-13	7.70585e-14	3.04065e-12	1.6911e-12	1.9579e-11	1.63717e-13	1.62092e-12	6.26381e-11
	Ecotoxicity, freshwater - organics	CTUe	0.0413495	9.88623e-05	0.00325729	0.0162864	1.46986e-05	8.96591e-06	0.00859909	0.0022292	0.0108576	3.52606e-05	0.000426527	0.0831635		Ecotoxicity, freshwater - organics	CTUe	0.0413495	9.88623e-05	0.00325729	0.0162864	1.46986e-05	8.96591e-06	0.00859909	0.0022292	0.108576	3.52606e-05	0.000426527	0.180882
	Ecotoxicity, freshwater - inorganics	CTUe	0.267384	0.00361191	0.0114607	0.0573035	0.00011231	8.2116e-05	0.0200225	0.0130356	0.0382023	0.0001829	0.13538	0.546778		Ecotoxicity, freshwater - inorganics	CTUe	0.267384	0.00361191	0.0114607	0.0573035	0.00011231	8.2116e-05	0.0200225	0.0130356	0.382023	0.0001829	0.13538	0.890599
	Ecotoxicity, freshwater - metals	CTUe	4.30095	0.00916618	0.0296143	0.148071	0.00132745	0.000962412	2.77234	0.199035	0.0987143	0.00183295	0.0323089	7.59433		Ecotoxicity, freshwater - metals	CTUe	4.30095	0.00916618	0.0296143	0.148071	0.00132745	0.000962412	2.77234	0.199035	0.987143	0.00183295	0.0323089	8.48276
	Calculation:	Analizza														Calculation:	Analizza
	Results:	Valutazione dell'impatto							Scenario SB-1A							Results:	Valutazione dell'impatto							Scenario SB-1A
	Product:	1 l 0. RIF - Mortar {Europe without Switzerland}| production | APOS, U - A1-A5 (del progetto						Trasporto	RIF							Product:	1 l 0. RIF - Mortar {Europe without Switzerland}| production | APOS, U - A1-A5 (del progetto						Trasporto	RIF
	Metodo:	EN 15804 +A2 Method V1.00 / EF 3.0 normalization and weighting set						Cemento	60							Metodo:	EN 15804 +A2 Method V1.00 / EF 3.0 normalization and weighting set						Cemento	60
	Indicatore:	Caratterizzazione						Sabbia	200							Indicatore:	Caratterizzazione						Sabbia	200
	Skip categories:	Mai							-							Skip categories:	Mai							-
	Esclude processi di infrastrutture:	No							-							Esclude processi di infrastrutture:	No							-
	Esclude le emissioni di lungo termine:	No						Fabbrica-cantiere	50							Esclude le emissioni di lungo termine:	No						Fabbrica-cantiere	500
	Sorted on item:	Categoria d'impatto							-							Sorted on item:	Categoria d'impatto							-
	Sort order:	Ascendente														Sort order:	Ascendente
	0. RIF - Mortar {Europe without Switzerland}| production | APOS, U - A1-A5		A1		A2		A3				A4	A5		TOT		0. RIF - Mortar {Europe without Switzerland}| production | APOS, U - A1-A5		A1		A2		A3				A4	A5		TOT
	Categoria d'impatto	Unità	Cement, limestone 6-20% {RoW}| cement production, limestone 6-20% | Cut-off, U	Sand 0/2 mm, wet and dry quarry, production mix, at plant, undried RER S -	T. Cemento_ Transport, freight, lorry, unspecified {RER}| market for transport, freight, lorry, unspecified | APOS, U	T. Sabbia_ Transport, freight, lorry, unspecified {RER}| market for transport, freight, lorry, unspecified | APOS, U	Conveyor belt {GLO}| market for | APOS, U	Industrial machine, heavy, unspecified {RoW}| market for industrial machine, heavy, unspecified | APOS, U	Packing, cement {RoW}| processing | APOS, U	Electricity, medium voltage {IT}| market for | APOS, U	A4_ Transport, freight, lorry, unspecified {RER}| market for transport, freight, lorry, unspecified | APOS, U	A5 - Tap water {Europe without Switzerland}| market for | APOS, U	A5 - Electricity grid mix, AC, consumption mix, at consumer, 230V IT S	Totale		Categoria d'impatto	Unità	Cement, limestone 6-20% {RoW}| cement production, limestone 6-20% | Cut-off, U	Sand 0/2 mm, wet and dry quarry, production mix, at plant, undried RER S -	T. Cemento_ Transport, freight, lorry, unspecified {RER}| market for transport, freight, lorry, unspecified | APOS, U	T. Sabbia_ Transport, freight, lorry, unspecified {RER}| market for transport, freight, lorry, unspecified | APOS, U	Conveyor belt {GLO}| market for | APOS, U	Industrial machine, heavy, unspecified {RoW}| market for industrial machine, heavy, unspecified | APOS, U	Packing, cement {RoW}| processing | APOS, U	Electricity, medium voltage {IT}| market for | APOS, U	A4_ Transport, freight, lorry, unspecified {RER}| market for transport, freight, lorry, unspecified | APOS, U	A5 - Tap water {Europe without Switzerland}| market for | APOS, U	A5 - Electricity grid mix, AC, consumption mix, at consumer, 230V IT S	Totale
	Climate change	kg CO2 eq	0.333981	0.00333406	0.00357402	0.0357402	4.25953e-05	1.60247e-05	0.0101208	0.0137938	0.0119134	0.000108248	0.0427702	0.455395		Climate change	kg CO2 eq	0.333981	0.00333406	0.00357402	0.0357402	4.25953e-05	1.60247e-05	0.0101208	0.0137938	0.119134	0.000108248	0.0427702	0.562615
	Ozone depletion	kg CFC11 eq	1.13597e-08	3.96353e-10	8.20615e-10	8.20615e-09	2.40923e-12	1.03759e-12	5.34012e-10	1.91019e-09	2.73538e-09	9.70207e-12	3.75595e-10	2.63512e-08		Ozone depletion	kg CFC11 eq	1.13597e-08	3.96353e-10	8.20615e-10	8.20615e-09	2.40923e-12	1.03759e-12	5.34012e-10	1.91019e-09	2.73538e-08	9.70207e-12	3.75595e-10	5.09696e-08
	Ionising radiation	kBq U-235 eq	0.00698221	0.000626499	0.000284624	0.00284624	2.43097e-06	1.09926e-06	0.000613941	0.0015694	0.000948747	3.62211e-05	0.00169879	0.0156102		Ionising radiation	kBq U-235 eq	0.00698221	0.000626499	0.000284624	0.00284624	2.43097e-06	1.09926e-06	0.000613941	0.0015694	0.00948747	3.62211e-05	0.00169879	0.0241489
	Photochemical ozone formation	kg NMVOC eq	0.000797007	2.35428e-05	2.27668e-05	0.000227668	1.60315e-07	7.20811e-08	3.8188e-05	2.92679e-05	7.58893e-05	3.35084e-07	5.92739e-05	0.00127417		Photochemical ozone formation	kg NMVOC eq	0.000797007	2.35428e-05	2.27668e-05	0.000227668	1.60315e-07	7.20811e-08	3.8188e-05	2.92679e-05	0.000758893	3.35084e-07	5.92739e-05	0.00195717
	Particulate matter	disease inc.	6.91278e-09	3.57624e-10	3.23241e-10	3.23241e-09	3.39854e-12	1.42359e-12	2.47316e-09	2.44889e-10	1.07747e-09	5.54085e-12	8.61566e-10	1.54935e-08		Particulate matter	disease inc.	6.91278e-09	3.57624e-10	3.23241e-10	3.23241e-09	3.39854e-12	1.42359e-12	2.47316e-09	2.44889e-10	1.07747e-08	5.54085e-12	8.61566e-10	2.51907e-08
	Human toxicity, non-cancer	CTUh	2.55769e-09	1.22523e-11	5.22336e-11	5.22336e-10	3.37519e-12	1.94015e-12	2.07622e-10	7.86455e-11	1.74112e-10	6.27242e-12	6.37921e-11	3.68027e-09		Human toxicity, non-cancer	CTUh	2.55769e-09	1.22523e-11	5.22336e-11	5.22336e-10	3.37519e-12	1.94015e-12	2.07622e-10	7.86455e-11	1.74112e-09	6.27242e-12	6.37921e-11	5.24728e-09
	Human toxicity, cancer	CTUh	6.65378e-11	2.13253e-13	1.42809e-12	1.42809e-11	2.5824e-13	1.0341e-13	1.94695e-11	2.78301e-12	4.76028e-12	2.47365e-13	3.71755e-12	1.13799e-10		Human toxicity, cancer	CTUh	6.65378e-11	2.13253e-13	1.42809e-12	1.42809e-11	2.5824e-13	1.0341e-13	1.94695e-11	2.78301e-12	4.76028e-11	2.47365e-13	3.71755e-12	1.56642e-10
	Acidification	mol H+ eq	0.000993823	3.20036e-05	2.02544e-05	0.000202544	1.87976e-07	1.26133e-07	3.88234e-05	6.39752e-05	6.75148e-05	5.96975e-07	0.000107222	0.00152707		Acidification	mol H+ eq	0.000993823	3.20036e-05	2.02544e-05	0.000202544	1.87976e-07	1.26133e-07	3.88234e-05	6.39752e-05	0.000675148	5.96975e-07	0.000107222	0.00213471
	Eutrophication, freshwater	kg P eq	4.20676e-05	7.46529e-10	2.6806e-07	2.6806e-06	2.32083e-08	1.44762e-08	2.36462e-06	3.56998e-06	8.93532e-07	7.5658e-08	2.02095e-09	5.19605e-05		Eutrophication, freshwater	kg P eq	4.20676e-05	7.46529e-10	2.6806e-07	2.6806e-06	2.32083e-08	1.44762e-08	2.36462e-06	3.56998e-06	8.93532e-06	7.5658e-08	2.02095e-09	6.00023e-05
	Eutrophication, marine	kg N eq	0.000283873	8.00089e-06	7.30762e-06	7.30762e-05	4.25411e-08	1.96117e-08	1.7325e-05	1.00239e-05	2.43587e-05	1.15904e-07	1.90314e-05	0.000443175		Eutrophication, marine	kg N eq	0.000283873	8.00089e-06	7.30762e-06	7.30762e-05	4.25411e-08	1.96117e-08	1.7325e-05	1.00239e-05	0.000243587	1.15904e-07	1.90314e-05	0.000662404
	Eutrophication, terrestrial	mol N eq	0.00321064	8.75376e-05	7.98747e-05	0.000798747	4.16343e-07	2.05008e-07	0.00011213	0.000110331	0.000266249	1.08649e-06	0.000209191	0.00487641		Eutrophication, terrestrial	mol N eq	0.00321064	8.75376e-05	7.98747e-05	0.000798747	4.16343e-07	2.05008e-07	0.00011213	0.000110331	0.00266249	1.08649e-06	0.000209191	0.00727265
	Ecotoxicity, freshwater	CTUe	4.60969	0.0128769	0.0443323	0.443323	0.00145446	0.00105349	2.80096	0.2143	0.147774	0.00205111	0.168116	8.44593		Ecotoxicity, freshwater	CTUe	4.60969	0.0128769	0.0443323	0.443323	0.00145446	0.00105349	2.80096	0.2143	1.47774	0.00205111	0.168116	9.7759
	Land use	Pt	1.02996	0	0.0628542	0.628542	0.00112114	0.000676069	1.5399	0.340344	0.209514	0.00169745	0.0032731	3.81788		Land use	Pt	1.02996	0	0.0628542	0.628542	0.00112114	0.000676069	1.5399	0.340344	2.09514	0.00169745	0.0032731	5.70351
	Water use	m3 depriv.	0.0155889	0.000242583	0.000180976	0.00180976	1.86864e-05	7.06333e-06	0.00683902	0.0100199	0.000603252	0.0129312	0.0286051	0.0768464		Water use	m3 depriv.	0.0155889	0.000242583	0.000180976	0.00180976	1.86864e-05	7.06333e-06	0.00683902	0.0100199	0.00603252	0.0129312	0.0286051	0.0822756
	Resource use, fossils	MJ	1.55101	0.0570464	0.0544854	0.544854	0.000408843	0.000159496	0.0859621	0.187158	0.181618	0.00173743	0.595339	3.25978		Resource use, fossils	MJ	1.55101	0.0570464	0.0544854	0.544854	0.000408843	0.000159496	0.0859621	0.187158	1.81618	0.00173743	0.595339	4.89434
	Resource use, minerals and metals	kg Sb eq	2.31856e-05	9.86731e-11	8.37666e-08	8.37666e-07	1.5435e-09	8.13928e-10	9.75947e-08	3.94865e-08	2.79222e-07	3.08679e-09	3.73648e-09	2.45326e-05		Resource use, minerals and metals	kg Sb eq	2.31856e-05	9.86731e-11	8.37666e-08	8.37666e-07	1.5435e-09	8.13928e-10	9.75947e-08	3.94865e-08	2.79222e-06	3.08679e-09	3.73648e-09	2.70456e-05
	Climate change - Fossil	kg CO2 eq	0.330701	0.00337243	0.00357078	0.0357078	4.24758e-05	1.59886e-05	0.00556468	0.0125335	0.0119026	0.000105634	0.0428314	0.446349		Climate change - Fossil	kg CO2 eq	0.330701	0.00337243	0.00357078	0.0357078	4.24758e-05	1.59886e-05	0.00556468	0.0125335	0.119026	0.000105634	0.0428314	0.553472
	Climate change - Biogenic	kg CO2 eq	0.00317501	-3.8366e-05	1.83661e-06	1.83661e-05	1.25274e-08	-7.11704e-09	0.00452275	0.00124799	6.12204e-06	2.4169e-06	-6.12064e-05	0.00887492		Climate change - Biogenic	kg CO2 eq	0.00317501	-3.8366e-05	1.83661e-06	1.83661e-05	1.25274e-08	-7.11704e-09	0.00452275	0.00124799	6.12204e-05	2.4169e-06	-6.12064e-05	0.00893002
	Climate change - Land use and LU change	kg CO2 eq	0.000105076	0	1.39574e-06	1.39574e-05	1.07024e-07	4.31495e-08	3.34016e-05	1.22948e-05	4.65248e-06	1.96648e-07	0	0.000171125		Climate change - Land use and LU change	kg CO2 eq	0.000105076	0	1.39574e-06	1.39574e-05	1.07024e-07	4.31495e-08	3.34016e-05	1.22948e-05	4.65248e-05	1.96648e-07	0	0.000212997
	Human toxicity, non-cancer - organics	CTUh	3.75683e-11	1.24483e-13	5.90864e-12	5.90864e-11	5.95903e-14	5.63053e-14	2.06811e-11	2.65288e-12	1.96955e-11	3.16409e-14	3.42499e-13	1.46207e-10		Human toxicity, non-cancer - organics	CTUh	3.75683e-11	1.24483e-13	5.90864e-12	5.90864e-11	5.95903e-14	5.63053e-14	2.06811e-11	2.65288e-12	1.96955e-10	3.16409e-14	3.42499e-13	3.23466e-10
	Human toxicity, non-cancer - inorganics	CTUh	3.84349e-10	4.08815e-12	1.00641e-11	1.00641e-10	4.65776e-13	1.78073e-13	6.33743e-11	1.13768e-11	3.35469e-11	5.6557e-13	2.16605e-11	6.3031e-10		Human toxicity, non-cancer - inorganics	CTUh	3.84349e-10	4.08815e-12	1.00641e-11	1.00641e-10	4.65776e-13	1.78073e-13	6.33743e-11	1.13768e-11	3.35469e-10	5.6557e-13	2.16605e-11	9.32232e-10
	Human toxicity, non-cancer - metals	CTUh	2.14731e-09	8.0397e-12	3.63706e-11	3.63706e-10	2.85397e-12	1.70737e-12	1.24214e-10	6.60075e-11	1.21235e-10	5.68413e-12	4.1789e-11	2.91891e-09		Human toxicity, non-cancer - metals	CTUh	2.14731e-09	8.0397e-12	3.63706e-11	3.63706e-10	2.85397e-12	1.70737e-12	1.24214e-10	6.60075e-11	1.21235e-09	5.68413e-12	4.1789e-11	4.01003e-09
	Human toxicity, cancer - organics	CTUh	3.3895e-11	1.04426e-13	8.40716e-13	8.40716e-12	6.84336e-14	2.63517e-14	1.64289e-11	1.09191e-12	2.80239e-12	8.36478e-14	2.09663e-12	6.58455e-11		Human toxicity, cancer - organics	CTUh	3.3895e-11	1.04426e-13	8.40716e-13	8.40716e-12	6.84336e-14	2.63517e-14	1.64289e-11	1.09191e-12	2.80239e-11	8.36478e-14	2.09663e-12	9.1067e-11
	Human toxicity, cancer - inorganics	CTUh	0	0	7.28961e-21	7.28961e-20	2.18973e-22	8.35363e-23	5.36536e-20	2.52748e-20	2.42987e-20	4.69048e-22	0	1.84184e-19		Human toxicity, cancer - inorganics	CTUh	0	0	7.28961e-21	7.28961e-20	2.18973e-22	8.35363e-23	5.36536e-20	2.52748e-20	2.42987e-19	4.69048e-22	0	4.02873e-19
	Human toxicity, cancer - metals	CTUh	3.26428e-11	1.08827e-13	5.87369e-13	5.87369e-12	1.89807e-13	7.70585e-14	3.04065e-12	1.6911e-12	1.9579e-12	1.63717e-13	1.62092e-12	4.79538e-11		Human toxicity, cancer - metals	CTUh	3.26428e-11	1.08827e-13	5.87369e-13	5.87369e-12	1.89807e-13	7.70585e-14	3.04065e-12	1.6911e-12	1.9579e-11	1.63717e-13	1.62092e-12	6.55749e-11
	Ecotoxicity, freshwater - organics	CTUe	0.0413495	9.88623e-05	0.00325729	0.0325729	1.46986e-05	8.96591e-06	0.00859909	0.0022292	0.0108576	3.52606e-05	0.000426527	0.0994499		Ecotoxicity, freshwater - organics	CTUe	0.0413495	9.88623e-05	0.00325729	0.0325729	1.46986e-05	8.96591e-06	0.00859909	0.0022292	0.108576	3.52606e-05	0.000426527	0.197169
	Ecotoxicity, freshwater - inorganics	CTUe	0.267384	0.00361191	0.0114607	0.114607	0.00011231	8.2116e-05	0.0200225	0.0130356	0.0382023	0.0001829	0.13538	0.604081		Ecotoxicity, freshwater - inorganics	CTUe	0.267384	0.00361191	0.0114607	0.114607	0.00011231	8.2116e-05	0.0200225	0.0130356	0.382023	0.0001829	0.13538	0.947902
	Ecotoxicity, freshwater - metals	CTUe	4.30095	0.00916618	0.0296143	0.296143	0.00132745	0.000962412	2.77234	0.199035	0.0987143	0.00183295	0.0323089	7.7424		Ecotoxicity, freshwater - metals	CTUe	4.30095	0.00916618	0.0296143	0.296143	0.00132745	0.000962412	2.77234	0.199035	0.987143	0.00183295	0.0323089	8.63083
	Calculation:	Analizza														Calculation:	Analizza
	Results:	Valutazione dell'impatto							Scenario SB-1A							Results:	Valutazione dell'impatto							Scenario SB-1A
	Product:	1 l 0. RIF - Mortar {Europe without Switzerland}| production | APOS, U - A1-A5 (del progetto						Trasporto	RIF							Product:	1 l 0. RIF - Mortar {Europe without Switzerland}| production | APOS, U - A1-A5 (del progetto						Trasporto	RIF
	Metodo:	EN 15804 +A2 Method V1.00 / EF 3.0 normalization and weighting set						Cemento	60							Metodo:	EN 15804 +A2 Method V1.00 / EF 3.0 normalization and weighting set						Cemento	60
	Indicatore:	Caratterizzazione						Sabbia	300							Indicatore:	Caratterizzazione						Sabbia	300
	Skip categories:	Mai							-							Skip categories:	Mai							-
	Esclude processi di infrastrutture:	No							-							Esclude processi di infrastrutture:	No							-
	Esclude le emissioni di lungo termine:	No						Fabbrica-cantiere	50							Esclude le emissioni di lungo termine:	No						Fabbrica-cantiere	500
	Sorted on item:	Categoria d'impatto							-							Sorted on item:	Categoria d'impatto							-
	Sort order:	Ascendente														Sort order:	Ascendente
	0. RIF - Mortar {Europe without Switzerland}| production | APOS, U - A1-A5		A1		A2		A3				A4	A5		TOT		0. RIF - Mortar {Europe without Switzerland}| production | APOS, U - A1-A5		A1		A2		A3				A4	A5		TOT
	Categoria d'impatto	Unità	Cement, limestone 6-20% {RoW}| cement production, limestone 6-20% | Cut-off, U	Sand 0/2 mm, wet and dry quarry, production mix, at plant, undried RER S -	T. Cemento_ Transport, freight, lorry, unspecified {RER}| market for transport, freight, lorry, unspecified | APOS, U	T. Sabbia_ Transport, freight, lorry, unspecified {RER}| market for transport, freight, lorry, unspecified | APOS, U	Conveyor belt {GLO}| market for | APOS, U	Industrial machine, heavy, unspecified {RoW}| market for industrial machine, heavy, unspecified | APOS, U	Packing, cement {RoW}| processing | APOS, U	Electricity, medium voltage {IT}| market for | APOS, U	A4_ Transport, freight, lorry, unspecified {RER}| market for transport, freight, lorry, unspecified | APOS, U	A5 - Tap water {Europe without Switzerland}| market for | APOS, U	A5 - Electricity grid mix, AC, consumption mix, at consumer, 230V IT S	Totale		Categoria d'impatto	Unità	Cement, limestone 6-20% {RoW}| cement production, limestone 6-20% | Cut-off, U	Sand 0/2 mm, wet and dry quarry, production mix, at plant, undried RER S -	T. Cemento_ Transport, freight, lorry, unspecified {RER}| market for transport, freight, lorry, unspecified | APOS, U	T. Sabbia_ Transport, freight, lorry, unspecified {RER}| market for transport, freight, lorry, unspecified | APOS, U	Conveyor belt {GLO}| market for | APOS, U	Industrial machine, heavy, unspecified {RoW}| market for industrial machine, heavy, unspecified | APOS, U	Packing, cement {RoW}| processing | APOS, U	Electricity, medium voltage {IT}| market for | APOS, U	A4_ Transport, freight, lorry, unspecified {RER}| market for transport, freight, lorry, unspecified | APOS, U	A5 - Tap water {Europe without Switzerland}| market for | APOS, U	A5 - Electricity grid mix, AC, consumption mix, at consumer, 230V IT S	Totale
	Climate change	kg CO2 eq	0.333981	0.00333406	0.00357402	0.0536103	4.25953e-05	1.60247e-05	0.0101208	0.0137938	0.0119134	0.000108248	0.0427702	0.473265		Climate change	kg CO2 eq	0.333981	0.00333406	0.00357402	0.0536103	4.25953e-05	1.60247e-05	0.0101208	0.0137938	0.119134	0.000108248	0.0427702	0.580485
	Ozone depletion	kg CFC11 eq	1.13597e-08	3.96353e-10	8.20615e-10	1.23092e-08	2.40923e-12	1.03759e-12	5.34012e-10	1.91019e-09	2.73538e-09	9.70207e-12	3.75595e-10	3.04543e-08		Ozone depletion	kg CFC11 eq	1.13597e-08	3.96353e-10	8.20615e-10	1.23092e-08	2.40923e-12	1.03759e-12	5.34012e-10	1.91019e-09	2.73538e-08	9.70207e-12	3.75595e-10	5.50727e-08
	Ionising radiation	kBq U-235 eq	0.00698221	0.000626499	0.000284624	0.00426936	2.43097e-06	1.09926e-06	0.000613941	0.0015694	0.000948747	3.62211e-05	0.00169879	0.0170333		Ionising radiation	kBq U-235 eq	0.00698221	0.000626499	0.000284624	0.00426936	2.43097e-06	1.09926e-06	0.000613941	0.0015694	0.00948747	3.62211e-05	0.00169879	0.0255721
	Photochemical ozone formation	kg NMVOC eq	0.000797007	2.35428e-05	2.27668e-05	0.000341502	1.60315e-07	7.20811e-08	3.8188e-05	2.92679e-05	7.58893e-05	3.35084e-07	5.92739e-05	0.001388		Photochemical ozone formation	kg NMVOC eq	0.000797007	2.35428e-05	2.27668e-05	0.000341502	1.60315e-07	7.20811e-08	3.8188e-05	2.92679e-05	0.000758893	3.35084e-07	5.92739e-05	0.00207101
	Particulate matter	disease inc.	6.91278e-09	3.57624e-10	3.23241e-10	4.84862e-09	3.39854e-12	1.42359e-12	2.47316e-09	2.44889e-10	1.07747e-09	5.54085e-12	8.61566e-10	1.71097e-08		Particulate matter	disease inc.	6.91278e-09	3.57624e-10	3.23241e-10	4.84862e-09	3.39854e-12	1.42359e-12	2.47316e-09	2.44889e-10	1.07747e-08	5.54085e-12	8.61566e-10	2.6807e-08
	Human toxicity, non-cancer	CTUh	2.55769e-09	1.22523e-11	5.22336e-11	7.83503e-10	3.37519e-12	1.94015e-12	2.07622e-10	7.86455e-11	1.74112e-10	6.27242e-12	6.37921e-11	3.94144e-09		Human toxicity, non-cancer	CTUh	2.55769e-09	1.22523e-11	5.22336e-11	7.83503e-10	3.37519e-12	1.94015e-12	2.07622e-10	7.86455e-11	1.74112e-09	6.27242e-12	6.37921e-11	5.50845e-09
	Human toxicity, cancer	CTUh	6.65378e-11	2.13253e-13	1.42809e-12	2.14213e-11	2.5824e-13	1.0341e-13	1.94695e-11	2.78301e-12	4.76028e-12	2.47365e-13	3.71755e-12	1.2094e-10		Human toxicity, cancer	CTUh	6.65378e-11	2.13253e-13	1.42809e-12	2.14213e-11	2.5824e-13	1.0341e-13	1.94695e-11	2.78301e-12	4.76028e-11	2.47365e-13	3.71755e-12	1.63782e-10
	Acidification	mol H+ eq	0.000993823	3.20036e-05	2.02544e-05	0.000303817	1.87976e-07	1.26133e-07	3.88234e-05	6.39752e-05	6.75148e-05	5.96975e-07	0.000107222	0.00162834		Acidification	mol H+ eq	0.000993823	3.20036e-05	2.02544e-05	0.000303817	1.87976e-07	1.26133e-07	3.88234e-05	6.39752e-05	0.000675148	5.96975e-07	0.000107222	0.00223598
	Eutrophication, freshwater	kg P eq	4.20676e-05	7.46529e-10	2.6806e-07	4.0209e-06	2.32083e-08	1.44762e-08	2.36462e-06	3.56998e-06	8.93532e-07	7.5658e-08	2.02095e-09	5.33008e-05		Eutrophication, freshwater	kg P eq	4.20676e-05	7.46529e-10	2.6806e-07	4.0209e-06	2.32083e-08	1.44762e-08	2.36462e-06	3.56998e-06	8.93532e-06	7.5658e-08	2.02095e-09	6.13426e-05
	Eutrophication, marine	kg N eq	0.000283873	8.00089e-06	7.30762e-06	0.000109614	4.25411e-08	1.96117e-08	1.7325e-05	1.00239e-05	2.43587e-05	1.15904e-07	1.90314e-05	0.000479713		Eutrophication, marine	kg N eq	0.000283873	8.00089e-06	7.30762e-06	0.000109614	4.25411e-08	1.96117e-08	1.7325e-05	1.00239e-05	0.000243587	1.15904e-07	1.90314e-05	0.000698942
	Eutrophication, terrestrial	mol N eq	0.00321064	8.75376e-05	7.98747e-05	0.00119812	4.16343e-07	2.05008e-07	0.00011213	0.000110331	0.000266249	1.08649e-06	0.000209191	0.00527578		Eutrophication, terrestrial	mol N eq	0.00321064	8.75376e-05	7.98747e-05	0.00119812	4.16343e-07	2.05008e-07	0.00011213	0.000110331	0.00266249	1.08649e-06	0.000209191	0.00767202
	Ecotoxicity, freshwater	CTUe	4.60969	0.0128769	0.0443323	0.664984	0.00145446	0.00105349	2.80096	0.2143	0.147774	0.00205111	0.168116	8.66759		Ecotoxicity, freshwater	CTUe	4.60969	0.0128769	0.0443323	0.664984	0.00145446	0.00105349	2.80096	0.2143	1.47774	0.00205111	0.168116	9.99756
	Land use	Pt	1.02996	0	0.0628542	0.942814	0.00112114	0.000676069	1.5399	0.340344	0.209514	0.00169745	0.0032731	4.13215		Land use	Pt	1.02996	0	0.0628542	0.942814	0.00112114	0.000676069	1.5399	0.340344	2.09514	0.00169745	0.0032731	6.01778
	Water use	m3 depriv.	0.0155889	0.000242583	0.000180976	0.00271463	1.86864e-05	7.06333e-06	0.00683902	0.0100199	0.000603252	0.0129312	0.0286051	0.0777512		Water use	m3 depriv.	0.0155889	0.000242583	0.000180976	0.00271463	1.86864e-05	7.06333e-06	0.00683902	0.0100199	0.00603252	0.0129312	0.0286051	0.0831805
	Resource use, fossils	MJ	1.55101	0.0570464	0.0544854	0.817281	0.000408843	0.000159496	0.0859621	0.187158	0.181618	0.00173743	0.595339	3.53221		Resource use, fossils	MJ	1.55101	0.0570464	0.0544854	0.817281	0.000408843	0.000159496	0.0859621	0.187158	1.81618	0.00173743	0.595339	5.16677
	Resource use, minerals and metals	kg Sb eq	2.31856e-05	9.86731e-11	8.37666e-08	1.2565e-06	1.5435e-09	8.13928e-10	9.75947e-08	3.94865e-08	2.79222e-07	3.08679e-09	3.73648e-09	2.49515e-05		Resource use, minerals and metals	kg Sb eq	2.31856e-05	9.86731e-11	8.37666e-08	1.2565e-06	1.5435e-09	8.13928e-10	9.75947e-08	3.94865e-08	2.79222e-06	3.08679e-09	3.73648e-09	2.74645e-05
	Climate change - Fossil	kg CO2 eq	0.330701	0.00337243	0.00357078	0.0535618	4.24758e-05	1.59886e-05	0.00556468	0.0125335	0.0119026	0.000105634	0.0428314	0.464203		Climate change - Fossil	kg CO2 eq	0.330701	0.00337243	0.00357078	0.0535618	4.24758e-05	1.59886e-05	0.00556468	0.0125335	0.119026	0.000105634	0.0428314	0.571326
	Climate change - Biogenic	kg CO2 eq	0.00317501	-3.8366e-05	1.83661e-06	2.75492e-05	1.25274e-08	-7.11704e-09	0.00452275	0.00124799	6.12204e-06	2.4169e-06	-6.12064e-05	0.0088841		Climate change - Biogenic	kg CO2 eq	0.00317501	-3.8366e-05	1.83661e-06	2.75492e-05	1.25274e-08	-7.11704e-09	0.00452275	0.00124799	6.12204e-05	2.4169e-06	-6.12064e-05	0.0089392
	Climate change - Land use and LU change	kg CO2 eq	0.000105076	0	1.39574e-06	2.09362e-05	1.07024e-07	4.31495e-08	3.34016e-05	1.22948e-05	4.65248e-06	1.96648e-07	0	0.000178104		Climate change - Land use and LU change	kg CO2 eq	0.000105076	0	1.39574e-06	2.09362e-05	1.07024e-07	4.31495e-08	3.34016e-05	1.22948e-05	4.65248e-05	1.96648e-07	0	0.000219976
	Human toxicity, non-cancer - organics	CTUh	3.75683e-11	1.24483e-13	5.90864e-12	8.86295e-11	5.95903e-14	5.63053e-14	2.06811e-11	2.65288e-12	1.96955e-11	3.16409e-14	3.42499e-13	1.7575e-10		Human toxicity, non-cancer - organics	CTUh	3.75683e-11	1.24483e-13	5.90864e-12	8.86295e-11	5.95903e-14	5.63053e-14	2.06811e-11	2.65288e-12	1.96955e-10	3.16409e-14	3.42499e-13	3.5301e-10
	Human toxicity, non-cancer - inorganics	CTUh	3.84349e-10	4.08815e-12	1.00641e-11	1.50961e-10	4.65776e-13	1.78073e-13	6.33743e-11	1.13768e-11	3.35469e-11	5.6557e-13	2.16605e-11	6.8063e-10		Human toxicity, non-cancer - inorganics	CTUh	3.84349e-10	4.08815e-12	1.00641e-11	1.50961e-10	4.65776e-13	1.78073e-13	6.33743e-11	1.13768e-11	3.35469e-10	5.6557e-13	2.16605e-11	9.82552e-10
	Human toxicity, non-cancer - metals	CTUh	2.14731e-09	8.0397e-12	3.63706e-11	5.45559e-10	2.85397e-12	1.70737e-12	1.24214e-10	6.60075e-11	1.21235e-10	5.68413e-12	4.1789e-11	3.10077e-09		Human toxicity, non-cancer - metals	CTUh	2.14731e-09	8.0397e-12	3.63706e-11	5.45559e-10	2.85397e-12	1.70737e-12	1.24214e-10	6.60075e-11	1.21235e-09	5.68413e-12	4.1789e-11	4.19188e-09
	Human toxicity, cancer - organics	CTUh	3.3895e-11	1.04426e-13	8.40716e-13	1.26107e-11	6.84336e-14	2.63517e-14	1.64289e-11	1.09191e-12	2.80239e-12	8.36478e-14	2.09663e-12	7.00491e-11		Human toxicity, cancer - organics	CTUh	3.3895e-11	1.04426e-13	8.40716e-13	1.26107e-11	6.84336e-14	2.63517e-14	1.64289e-11	1.09191e-12	2.80239e-11	8.36478e-14	2.09663e-12	9.52706e-11
	Human toxicity, cancer - inorganics	CTUh	0	0	7.28961e-21	1.09344e-19	2.18973e-22	8.35363e-23	5.36536e-20	2.52748e-20	2.42987e-20	4.69048e-22	0	2.20632e-19		Human toxicity, cancer - inorganics	CTUh	0	0	7.28961e-21	1.09344e-19	2.18973e-22	8.35363e-23	5.36536e-20	2.52748e-20	2.42987e-19	4.69048e-22	0	4.39321e-19
	Human toxicity, cancer - metals	CTUh	3.26428e-11	1.08827e-13	5.87369e-13	8.81053e-12	1.89807e-13	7.70585e-14	3.04065e-12	1.6911e-12	1.9579e-12	1.63717e-13	1.62092e-12	5.08907e-11		Human toxicity, cancer - metals	CTUh	3.26428e-11	1.08827e-13	5.87369e-13	8.81053e-12	1.89807e-13	7.70585e-14	3.04065e-12	1.6911e-12	1.9579e-11	1.63717e-13	1.62092e-12	6.85117e-11
	Ecotoxicity, freshwater - organics	CTUe	0.0413495	9.88623e-05	0.00325729	0.0488593	1.46986e-05	8.96591e-06	0.00859909	0.0022292	0.0108576	3.52606e-05	0.000426527	0.115736		Ecotoxicity, freshwater - organics	CTUe	0.0413495	9.88623e-05	0.00325729	0.0488593	1.46986e-05	8.96591e-06	0.00859909	0.0022292	0.108576	3.52606e-05	0.000426527	0.213455
	Ecotoxicity, freshwater - inorganics	CTUe	0.267384	0.00361191	0.0114607	0.17191	0.00011231	8.2116e-05	0.0200225	0.0130356	0.0382023	0.0001829	0.13538	0.661385		Ecotoxicity, freshwater - inorganics	CTUe	0.267384	0.00361191	0.0114607	0.17191	0.00011231	8.2116e-05	0.0200225	0.0130356	0.382023	0.0001829	0.13538	1.00521
	Ecotoxicity, freshwater - metals	CTUe	4.30095	0.00916618	0.0296143	0.444214	0.00132745	0.000962412	2.77234	0.199035	0.0987143	0.00183295	0.0323089	7.89047		Ecotoxicity, freshwater - metals	CTUe	4.30095	0.00916618	0.0296143	0.444214	0.00132745	0.000962412	2.77234	0.199035	0.987143	0.00183295	0.0323089	8.7789
	Calculation:	Analizza														Calculation:	Analizza
	Results:	Valutazione dell'impatto							Scenario SB-1A							Results:	Valutazione dell'impatto							Scenario SB-1A
	Product:	1 l 0. RIF - Mortar {Europe without Switzerland}| production | APOS, U - A1-A5 (del progetto						Trasporto	RIF							Product:	1 l 0. RIF - Mortar {Europe without Switzerland}| production | APOS, U - A1-A5 (del progetto						Trasporto	RIF
	Metodo:	EN 15804 +A2 Method V1.00 / EF 3.0 normalization and weighting set						Cemento	60							Metodo:	EN 15804 +A2 Method V1.00 / EF 3.0 normalization and weighting set						Cemento	60
	Indicatore:	Caratterizzazione						Sabbia	400							Indicatore:	Caratterizzazione						Sabbia	400
	Skip categories:	Mai							-							Skip categories:	Mai							-
	Esclude processi di infrastrutture:	No							-							Esclude processi di infrastrutture:	No							-
	Esclude le emissioni di lungo termine:	No						Fabbrica-cantiere	50							Esclude le emissioni di lungo termine:	No						Fabbrica-cantiere	500
	Sorted on item:	Categoria d'impatto							-							Sorted on item:	Categoria d'impatto							-
	Sort order:	Ascendente														Sort order:	Ascendente
	0. RIF - Mortar {Europe without Switzerland}| production | APOS, U - A1-A5		A1		A2		A3				A4	A5		TOT		0. RIF - Mortar {Europe without Switzerland}| production | APOS, U - A1-A5		A1		A2		A3				A4	A5		TOT
	Categoria d'impatto	Unità	Cement, limestone 6-20% {RoW}| cement production, limestone 6-20% | Cut-off, U	Sand 0/2 mm, wet and dry quarry, production mix, at plant, undried RER S -	T. Cemento_ Transport, freight, lorry, unspecified {RER}| market for transport, freight, lorry, unspecified | APOS, U	T. Sabbia_ Transport, freight, lorry, unspecified {RER}| market for transport, freight, lorry, unspecified | APOS, U	Conveyor belt {GLO}| market for | APOS, U	Industrial machine, heavy, unspecified {RoW}| market for industrial machine, heavy, unspecified | APOS, U	Packing, cement {RoW}| processing | APOS, U	Electricity, medium voltage {IT}| market for | APOS, U	A4_ Transport, freight, lorry, unspecified {RER}| market for transport, freight, lorry, unspecified | APOS, U	A5 - Tap water {Europe without Switzerland}| market for | APOS, U	A5 - Electricity grid mix, AC, consumption mix, at consumer, 230V IT S	Totale		Categoria d'impatto	Unità	Cement, limestone 6-20% {RoW}| cement production, limestone 6-20% | Cut-off, U	Sand 0/2 mm, wet and dry quarry, production mix, at plant, undried RER S -	T. Cemento_ Transport, freight, lorry, unspecified {RER}| market for transport, freight, lorry, unspecified | APOS, U	T. Sabbia_ Transport, freight, lorry, unspecified {RER}| market for transport, freight, lorry, unspecified | APOS, U	Conveyor belt {GLO}| market for | APOS, U	Industrial machine, heavy, unspecified {RoW}| market for industrial machine, heavy, unspecified | APOS, U	Packing, cement {RoW}| processing | APOS, U	Electricity, medium voltage {IT}| market for | APOS, U	A4_ Transport, freight, lorry, unspecified {RER}| market for transport, freight, lorry, unspecified | APOS, U	A5 - Tap water {Europe without Switzerland}| market for | APOS, U	A5 - Electricity grid mix, AC, consumption mix, at consumer, 230V IT S	Totale
	Climate change	kg CO2 eq	0.333981	0.00333406	0.00357402	0.0714803	4.25953e-05	1.60247e-05	0.0101208	0.0137938	0.0119134	0.000108248	0.0427702	0.491135		Climate change	kg CO2 eq	0.333981	0.00333406	0.00357402	0.0714803	4.25953e-05	1.60247e-05	0.0101208	0.0137938	0.119134	0.000108248	0.0427702	0.598355
	Ozone depletion	kg CFC11 eq	1.13597e-08	3.96353e-10	8.20615e-10	1.64123e-08	2.40923e-12	1.03759e-12	5.34012e-10	1.91019e-09	2.73538e-09	9.70207e-12	3.75595e-10	3.45573e-08		Ozone depletion	kg CFC11 eq	1.13597e-08	3.96353e-10	8.20615e-10	1.64123e-08	2.40923e-12	1.03759e-12	5.34012e-10	1.91019e-09	2.73538e-08	9.70207e-12	3.75595e-10	5.91758e-08
	Ionising radiation	kBq U-235 eq	0.00698221	0.000626499	0.000284624	0.00569248	2.43097e-06	1.09926e-06	0.000613941	0.0015694	0.000948747	3.62211e-05	0.00169879	0.0184564		Ionising radiation	kBq U-235 eq	0.00698221	0.000626499	0.000284624	0.00569248	2.43097e-06	1.09926e-06	0.000613941	0.0015694	0.00948747	3.62211e-05	0.00169879	0.0269952
	Photochemical ozone formation	kg NMVOC eq	0.000797007	2.35428e-05	2.27668e-05	0.000455336	1.60315e-07	7.20811e-08	3.8188e-05	2.92679e-05	7.58893e-05	3.35084e-07	5.92739e-05	0.00150184		Photochemical ozone formation	kg NMVOC eq	0.000797007	2.35428e-05	2.27668e-05	0.000455336	1.60315e-07	7.20811e-08	3.8188e-05	2.92679e-05	0.000758893	3.35084e-07	5.92739e-05	0.00218484
	Particulate matter	disease inc.	6.91278e-09	3.57624e-10	3.23241e-10	6.46482e-09	3.39854e-12	1.42359e-12	2.47316e-09	2.44889e-10	1.07747e-09	5.54085e-12	8.61566e-10	1.87259e-08		Particulate matter	disease inc.	6.91278e-09	3.57624e-10	3.23241e-10	6.46482e-09	3.39854e-12	1.42359e-12	2.47316e-09	2.44889e-10	1.07747e-08	5.54085e-12	8.61566e-10	2.84232e-08
	Human toxicity, non-cancer	CTUh	2.55769e-09	1.22523e-11	5.22336e-11	1.04467e-09	3.37519e-12	1.94015e-12	2.07622e-10	7.86455e-11	1.74112e-10	6.27242e-12	6.37921e-11	4.20261e-09		Human toxicity, non-cancer	CTUh	2.55769e-09	1.22523e-11	5.22336e-11	1.04467e-09	3.37519e-12	1.94015e-12	2.07622e-10	7.86455e-11	1.74112e-09	6.27242e-12	6.37921e-11	5.76962e-09
	Human toxicity, cancer	CTUh	6.65378e-11	2.13253e-13	1.42809e-12	2.85617e-11	2.5824e-13	1.0341e-13	1.94695e-11	2.78301e-12	4.76028e-12	2.47365e-13	3.71755e-12	1.2808e-10		Human toxicity, cancer	CTUh	6.65378e-11	2.13253e-13	1.42809e-12	2.85617e-11	2.5824e-13	1.0341e-13	1.94695e-11	2.78301e-12	4.76028e-11	2.47365e-13	3.71755e-12	1.70923e-10
	Acidification	mol H+ eq	0.000993823	3.20036e-05	2.02544e-05	0.000405089	1.87976e-07	1.26133e-07	3.88234e-05	6.39752e-05	6.75148e-05	5.96975e-07	0.000107222	0.00172962		Acidification	mol H+ eq	0.000993823	3.20036e-05	2.02544e-05	0.000405089	1.87976e-07	1.26133e-07	3.88234e-05	6.39752e-05	0.000675148	5.96975e-07	0.000107222	0.00233725
	Eutrophication, freshwater	kg P eq	4.20676e-05	7.46529e-10	2.6806e-07	5.36119e-06	2.32083e-08	1.44762e-08	2.36462e-06	3.56998e-06	8.93532e-07	7.5658e-08	2.02095e-09	5.46411e-05		Eutrophication, freshwater	kg P eq	4.20676e-05	7.46529e-10	2.6806e-07	5.36119e-06	2.32083e-08	1.44762e-08	2.36462e-06	3.56998e-06	8.93532e-06	7.5658e-08	2.02095e-09	6.26829e-05
	Eutrophication, marine	kg N eq	0.000283873	8.00089e-06	7.30762e-06	0.000146152	4.25411e-08	1.96117e-08	1.7325e-05	1.00239e-05	2.43587e-05	1.15904e-07	1.90314e-05	0.000516251		Eutrophication, marine	kg N eq	0.000283873	8.00089e-06	7.30762e-06	0.000146152	4.25411e-08	1.96117e-08	1.7325e-05	1.00239e-05	0.000243587	1.15904e-07	1.90314e-05	0.00073548
	Eutrophication, terrestrial	mol N eq	0.00321064	8.75376e-05	7.98747e-05	0.00159749	4.16343e-07	2.05008e-07	0.00011213	0.000110331	0.000266249	1.08649e-06	0.000209191	0.00567515		Eutrophication, terrestrial	mol N eq	0.00321064	8.75376e-05	7.98747e-05	0.00159749	4.16343e-07	2.05008e-07	0.00011213	0.000110331	0.00266249	1.08649e-06	0.000209191	0.0080714
	Ecotoxicity, freshwater	CTUe	4.60969	0.0128769	0.0443323	0.886646	0.00145446	0.00105349	2.80096	0.2143	0.147774	0.00205111	0.168116	8.88925		Ecotoxicity, freshwater	CTUe	4.60969	0.0128769	0.0443323	0.886646	0.00145446	0.00105349	2.80096	0.2143	1.47774	0.00205111	0.168116	10.2192
	Land use	Pt	1.02996	0	0.0628542	1.25709	0.00112114	0.000676069	1.5399	0.340344	0.209514	0.00169745	0.0032731	4.44642		Land use	Pt	1.02996	0	0.0628542	1.25709	0.00112114	0.000676069	1.5399	0.340344	2.09514	0.00169745	0.0032731	6.33205
	Water use	m3 depriv.	0.0155889	0.000242583	0.000180976	0.00361951	1.86864e-05	7.06333e-06	0.00683902	0.0100199	0.000603252	0.0129312	0.0286051	0.0786561		Water use	m3 depriv.	0.0155889	0.000242583	0.000180976	0.00361951	1.86864e-05	7.06333e-06	0.00683902	0.0100199	0.00603252	0.0129312	0.0286051	0.0840854
	Resource use, fossils	MJ	1.55101	0.0570464	0.0544854	1.08971	0.000408843	0.000159496	0.0859621	0.187158	0.181618	0.00173743	0.595339	3.80464		Resource use, fossils	MJ	1.55101	0.0570464	0.0544854	1.08971	0.000408843	0.000159496	0.0859621	0.187158	1.81618	0.00173743	0.595339	5.4392
	Resource use, minerals and metals	kg Sb eq	2.31856e-05	9.86731e-11	8.37666e-08	1.67533e-06	1.5435e-09	8.13928e-10	9.75947e-08	3.94865e-08	2.79222e-07	3.08679e-09	3.73648e-09	2.53703e-05		Resource use, minerals and metals	kg Sb eq	2.31856e-05	9.86731e-11	8.37666e-08	1.67533e-06	1.5435e-09	8.13928e-10	9.75947e-08	3.94865e-08	2.79222e-06	3.08679e-09	3.73648e-09	2.78833e-05
	Climate change - Fossil	kg CO2 eq	0.330701	0.00337243	0.00357078	0.0714157	4.24758e-05	1.59886e-05	0.00556468	0.0125335	0.0119026	0.000105634	0.0428314	0.482056		Climate change - Fossil	kg CO2 eq	0.330701	0.00337243	0.00357078	0.0714157	4.24758e-05	1.59886e-05	0.00556468	0.0125335	0.119026	0.000105634	0.0428314	0.58918
	Climate change - Biogenic	kg CO2 eq	0.00317501	-3.8366e-05	1.83661e-06	3.67322e-05	1.25274e-08	-7.11704e-09	0.00452275	0.00124799	6.12204e-06	2.4169e-06	-6.12064e-05	0.00889329		Climate change - Biogenic	kg CO2 eq	0.00317501	-3.8366e-05	1.83661e-06	3.67322e-05	1.25274e-08	-7.11704e-09	0.00452275	0.00124799	6.12204e-05	2.4169e-06	-6.12064e-05	0.00894839
	Climate change - Land use and LU change	kg CO2 eq	0.000105076	0	1.39574e-06	2.79149e-05	1.07024e-07	4.31495e-08	3.34016e-05	1.22948e-05	4.65248e-06	1.96648e-07	0	0.000185082		Climate change - Land use and LU change	kg CO2 eq	0.000105076	0	1.39574e-06	2.79149e-05	1.07024e-07	4.31495e-08	3.34016e-05	1.22948e-05	4.65248e-05	1.96648e-07	0	0.000226955
	Human toxicity, non-cancer - organics	CTUh	3.75683e-11	1.24483e-13	5.90864e-12	1.18173e-10	5.95903e-14	5.63053e-14	2.06811e-11	2.65288e-12	1.96955e-11	3.16409e-14	3.42499e-13	2.05294e-10		Human toxicity, non-cancer - organics	CTUh	3.75683e-11	1.24483e-13	5.90864e-12	1.18173e-10	5.95903e-14	5.63053e-14	2.06811e-11	2.65288e-12	1.96955e-10	3.16409e-14	3.42499e-13	3.82553e-10
	Human toxicity, non-cancer - inorganics	CTUh	3.84349e-10	4.08815e-12	1.00641e-11	2.01281e-10	4.65776e-13	1.78073e-13	6.33743e-11	1.13768e-11	3.35469e-11	5.6557e-13	2.16605e-11	7.30951e-10		Human toxicity, non-cancer - inorganics	CTUh	3.84349e-10	4.08815e-12	1.00641e-11	2.01281e-10	4.65776e-13	1.78073e-13	6.33743e-11	1.13768e-11	3.35469e-10	5.6557e-13	2.16605e-11	1.03287e-09
	Human toxicity, non-cancer - metals	CTUh	2.14731e-09	8.0397e-12	3.63706e-11	7.27411e-10	2.85397e-12	1.70737e-12	1.24214e-10	6.60075e-11	1.21235e-10	5.68413e-12	4.1789e-11	3.28262e-09		Human toxicity, non-cancer - metals	CTUh	2.14731e-09	8.0397e-12	3.63706e-11	7.27411e-10	2.85397e-12	1.70737e-12	1.24214e-10	6.60075e-11	1.21235e-09	5.68413e-12	4.1789e-11	4.37374e-09
	Human toxicity, cancer - organics	CTUh	3.3895e-11	1.04426e-13	8.40716e-13	1.68143e-11	6.84336e-14	2.63517e-14	1.64289e-11	1.09191e-12	2.80239e-12	8.36478e-14	2.09663e-12	7.42527e-11		Human toxicity, cancer - organics	CTUh	3.3895e-11	1.04426e-13	8.40716e-13	1.68143e-11	6.84336e-14	2.63517e-14	1.64289e-11	1.09191e-12	2.80239e-11	8.36478e-14	2.09663e-12	9.94742e-11
	Human toxicity, cancer - inorganics	CTUh	0	0	7.28961e-21	1.45792e-19	2.18973e-22	8.35363e-23	5.36536e-20	2.52748e-20	2.42987e-20	4.69048e-22	0	2.5708e-19		Human toxicity, cancer - inorganics	CTUh	0	0	7.28961e-21	1.45792e-19	2.18973e-22	8.35363e-23	5.36536e-20	2.52748e-20	2.42987e-19	4.69048e-22	0	4.75769e-19
	Human toxicity, cancer - metals	CTUh	3.26428e-11	1.08827e-13	5.87369e-13	1.17474e-11	1.89807e-13	7.70585e-14	3.04065e-12	1.6911e-12	1.9579e-12	1.63717e-13	1.62092e-12	5.38275e-11		Human toxicity, cancer - metals	CTUh	3.26428e-11	1.08827e-13	5.87369e-13	1.17474e-11	1.89807e-13	7.70585e-14	3.04065e-12	1.6911e-12	1.9579e-11	1.63717e-13	1.62092e-12	7.14486e-11
	Ecotoxicity, freshwater - organics	CTUe	0.0413495	9.88623e-05	0.00325729	0.0651458	1.46986e-05	8.96591e-06	0.00859909	0.0022292	0.0108576	3.52606e-05	0.000426527	0.132023		Ecotoxicity, freshwater - organics	CTUe	0.0413495	9.88623e-05	0.00325729	0.0651458	1.46986e-05	8.96591e-06	0.00859909	0.0022292	0.108576	3.52606e-05	0.000426527	0.229741
	Ecotoxicity, freshwater - inorganics	CTUe	0.267384	0.00361191	0.0114607	0.229214	0.00011231	8.2116e-05	0.0200225	0.0130356	0.0382023	0.0001829	0.13538	0.718688		Ecotoxicity, freshwater - inorganics	CTUe	0.267384	0.00361191	0.0114607	0.229214	0.00011231	8.2116e-05	0.0200225	0.0130356	0.382023	0.0001829	0.13538	1.06251
	Ecotoxicity, freshwater - metals	CTUe	4.30095	0.00916618	0.0296143	0.592286	0.00132745	0.000962412	2.77234	0.199035	0.0987143	0.00183295	0.0323089	8.03854		Ecotoxicity, freshwater - metals	CTUe	4.30095	0.00916618	0.0296143	0.592286	0.00132745	0.000962412	2.77234	0.199035	0.987143	0.00183295	0.0323089	8.92697
	Calculation:	Analizza														Calculation:	Analizza
	Results:	Valutazione dell'impatto							Scenario SB-1A							Results:	Valutazione dell'impatto							Scenario SB-1A
	Product:	1 l 0. RIF - Mortar {Europe without Switzerland}| production | APOS, U - A1-A5 (del progetto						Trasporto	RIF							Product:	1 l 0. RIF - Mortar {Europe without Switzerland}| production | APOS, U - A1-A5 (del progetto						Trasporto	RIF
	Metodo:	EN 15804 +A2 Method V1.00 / EF 3.0 normalization and weighting set						Cemento	60							Metodo:	EN 15804 +A2 Method V1.00 / EF 3.0 normalization and weighting set						Cemento	60
	Indicatore:	Caratterizzazione						Sabbia	500							Indicatore:	Caratterizzazione						Sabbia	500
	Skip categories:	Mai							-							Skip categories:	Mai							-
	Esclude processi di infrastrutture:	No							-							Esclude processi di infrastrutture:	No							-
	Esclude le emissioni di lungo termine:	No						Fabbrica-cantiere	50							Esclude le emissioni di lungo termine:	No						Fabbrica-cantiere	500
	Sorted on item:	Categoria d'impatto							-							Sorted on item:	Categoria d'impatto							-
	Sort order:	Ascendente														Sort order:	Ascendente
	0. RIF - Mortar {Europe without Switzerland}| production | APOS, U - A1-A5		A1		A2		A3				A4	A5		TOT		0. RIF - Mortar {Europe without Switzerland}| production | APOS, U - A1-A5		A1		A2		A3				A4	A5		TOT
	Categoria d'impatto	Unità	Cement, limestone 6-20% {RoW}| cement production, limestone 6-20% | Cut-off, U	Sand 0/2 mm, wet and dry quarry, production mix, at plant, undried RER S -	T. Cemento_ Transport, freight, lorry, unspecified {RER}| market for transport, freight, lorry, unspecified | APOS, U	T. Sabbia_ Transport, freight, lorry, unspecified {RER}| market for transport, freight, lorry, unspecified | APOS, U	Conveyor belt {GLO}| market for | APOS, U	Industrial machine, heavy, unspecified {RoW}| market for industrial machine, heavy, unspecified | APOS, U	Packing, cement {RoW}| processing | APOS, U	Electricity, medium voltage {IT}| market for | APOS, U	A4_ Transport, freight, lorry, unspecified {RER}| market for transport, freight, lorry, unspecified | APOS, U	A5 - Tap water {Europe without Switzerland}| market for | APOS, U	A5 - Electricity grid mix, AC, consumption mix, at consumer, 230V IT S	Totale		Categoria d'impatto	Unità	Cement, limestone 6-20% {RoW}| cement production, limestone 6-20% | Cut-off, U	Sand 0/2 mm, wet and dry quarry, production mix, at plant, undried RER S -	T. Cemento_ Transport, freight, lorry, unspecified {RER}| market for transport, freight, lorry, unspecified | APOS, U	T. Sabbia_ Transport, freight, lorry, unspecified {RER}| market for transport, freight, lorry, unspecified | APOS, U	Conveyor belt {GLO}| market for | APOS, U	Industrial machine, heavy, unspecified {RoW}| market for industrial machine, heavy, unspecified | APOS, U	Packing, cement {RoW}| processing | APOS, U	Electricity, medium voltage {IT}| market for | APOS, U	A4_ Transport, freight, lorry, unspecified {RER}| market for transport, freight, lorry, unspecified | APOS, U	A5 - Tap water {Europe without Switzerland}| market for | APOS, U	A5 - Electricity grid mix, AC, consumption mix, at consumer, 230V IT S	Totale
	Climate change	kg CO2 eq	0.333981	0.00333406	0.00357402	0.0893504	4.25953e-05	1.60247e-05	0.0101208	0.0137938	0.0119134	0.000108248	0.0427702	0.509005		Climate change	kg CO2 eq	0.333981	0.00333406	0.00357402	0.0893504	4.25953e-05	1.60247e-05	0.0101208	0.0137938	0.119134	0.000108248	0.0427702	0.616225
	Ozone depletion	kg CFC11 eq	1.13597e-08	3.96353e-10	8.20615e-10	2.05154e-08	2.40923e-12	1.03759e-12	5.34012e-10	1.91019e-09	2.73538e-09	9.70207e-12	3.75595e-10	3.86604e-08		Ozone depletion	kg CFC11 eq	1.13597e-08	3.96353e-10	8.20615e-10	2.05154e-08	2.40923e-12	1.03759e-12	5.34012e-10	1.91019e-09	2.73538e-08	9.70207e-12	3.75595e-10	6.32789e-08
	Ionising radiation	kBq U-235 eq	0.00698221	0.000626499	0.000284624	0.00711561	2.43097e-06	1.09926e-06	0.000613941	0.0015694	0.000948747	3.62211e-05	0.00169879	0.0198796		Ionising radiation	kBq U-235 eq	0.00698221	0.000626499	0.000284624	0.00711561	2.43097e-06	1.09926e-06	0.000613941	0.0015694	0.00948747	3.62211e-05	0.00169879	0.0284183
	Photochemical ozone formation	kg NMVOC eq	0.000797007	2.35428e-05	2.27668e-05	0.000569169	1.60315e-07	7.20811e-08	3.8188e-05	2.92679e-05	7.58893e-05	3.35084e-07	5.92739e-05	0.00161567		Photochemical ozone formation	kg NMVOC eq	0.000797007	2.35428e-05	2.27668e-05	0.000569169	1.60315e-07	7.20811e-08	3.8188e-05	2.92679e-05	0.000758893	3.35084e-07	5.92739e-05	0.00229868
	Particulate matter	disease inc.	6.91278e-09	3.57624e-10	3.23241e-10	8.08103e-09	3.39854e-12	1.42359e-12	2.47316e-09	2.44889e-10	1.07747e-09	5.54085e-12	8.61566e-10	2.03421e-08		Particulate matter	disease inc.	6.91278e-09	3.57624e-10	3.23241e-10	8.08103e-09	3.39854e-12	1.42359e-12	2.47316e-09	2.44889e-10	1.07747e-08	5.54085e-12	8.61566e-10	3.00394e-08
	Human toxicity, non-cancer	CTUh	2.55769e-09	1.22523e-11	5.22336e-11	1.30584e-09	3.37519e-12	1.94015e-12	2.07622e-10	7.86455e-11	1.74112e-10	6.27242e-12	6.37921e-11	4.46378e-09		Human toxicity, non-cancer	CTUh	2.55769e-09	1.22523e-11	5.22336e-11	1.30584e-09	3.37519e-12	1.94015e-12	2.07622e-10	7.86455e-11	1.74112e-09	6.27242e-12	6.37921e-11	6.03078e-09
	Human toxicity, cancer	CTUh	6.65378e-11	2.13253e-13	1.42809e-12	3.57021e-11	2.5824e-13	1.0341e-13	1.94695e-11	2.78301e-12	4.76028e-12	2.47365e-13	3.71755e-12	1.35221e-10		Human toxicity, cancer	CTUh	6.65378e-11	2.13253e-13	1.42809e-12	3.57021e-11	2.5824e-13	1.0341e-13	1.94695e-11	2.78301e-12	4.76028e-11	2.47365e-13	3.71755e-12	1.78063e-10
	Acidification	mol H+ eq	0.000993823	3.20036e-05	2.02544e-05	0.000506361	1.87976e-07	1.26133e-07	3.88234e-05	6.39752e-05	6.75148e-05	5.96975e-07	0.000107222	0.00183089		Acidification	mol H+ eq	0.000993823	3.20036e-05	2.02544e-05	0.000506361	1.87976e-07	1.26133e-07	3.88234e-05	6.39752e-05	0.000675148	5.96975e-07	0.000107222	0.00243852
	Eutrophication, freshwater	kg P eq	4.20676e-05	7.46529e-10	2.6806e-07	6.70149e-06	2.32083e-08	1.44762e-08	2.36462e-06	3.56998e-06	8.93532e-07	7.5658e-08	2.02095e-09	5.59814e-05		Eutrophication, freshwater	kg P eq	4.20676e-05	7.46529e-10	2.6806e-07	6.70149e-06	2.32083e-08	1.44762e-08	2.36462e-06	3.56998e-06	8.93532e-06	7.5658e-08	2.02095e-09	6.40232e-05
	Eutrophication, marine	kg N eq	0.000283873	8.00089e-06	7.30762e-06	0.000182691	4.25411e-08	1.96117e-08	1.7325e-05	1.00239e-05	2.43587e-05	1.15904e-07	1.90314e-05	0.00055279		Eutrophication, marine	kg N eq	0.000283873	8.00089e-06	7.30762e-06	0.000182691	4.25411e-08	1.96117e-08	1.7325e-05	1.00239e-05	0.000243587	1.15904e-07	1.90314e-05	0.000772018
	Eutrophication, terrestrial	mol N eq	0.00321064	8.75376e-05	7.98747e-05	0.00199687	4.16343e-07	2.05008e-07	0.00011213	0.000110331	0.000266249	1.08649e-06	0.000209191	0.00607453		Eutrophication, terrestrial	mol N eq	0.00321064	8.75376e-05	7.98747e-05	0.00199687	4.16343e-07	2.05008e-07	0.00011213	0.000110331	0.00266249	1.08649e-06	0.000209191	0.00847077
	Ecotoxicity, freshwater	CTUe	4.60969	0.0128769	0.0443323	1.10831	0.00145446	0.00105349	2.80096	0.2143	0.147774	0.00205111	0.168116	9.11092		Ecotoxicity, freshwater	CTUe	4.60969	0.0128769	0.0443323	1.10831	0.00145446	0.00105349	2.80096	0.2143	1.47774	0.00205111	0.168116	10.4409
	Land use	Pt	1.02996	0	0.0628542	1.57136	0.00112114	0.000676069	1.5399	0.340344	0.209514	0.00169745	0.0032731	4.76069		Land use	Pt	1.02996	0	0.0628542	1.57136	0.00112114	0.000676069	1.5399	0.340344	2.09514	0.00169745	0.0032731	6.64632
	Water use	m3 depriv.	0.0155889	0.000242583	0.000180976	0.00452439	1.86864e-05	7.06333e-06	0.00683902	0.0100199	0.000603252	0.0129312	0.0286051	0.079561		Water use	m3 depriv.	0.0155889	0.000242583	0.000180976	0.00452439	1.86864e-05	7.06333e-06	0.00683902	0.0100199	0.00603252	0.0129312	0.0286051	0.0849903
	Resource use, fossils	MJ	1.55101	0.0570464	0.0544854	1.36213	0.000408843	0.000159496	0.0859621	0.187158	0.181618	0.00173743	0.595339	4.07706		Resource use, fossils	MJ	1.55101	0.0570464	0.0544854	1.36213	0.000408843	0.000159496	0.0859621	0.187158	1.81618	0.00173743	0.595339	5.71162
	Resource use, minerals and metals	kg Sb eq	2.31856e-05	9.86731e-11	8.37666e-08	2.09417e-06	1.5435e-09	8.13928e-10	9.75947e-08	3.94865e-08	2.79222e-07	3.08679e-09	3.73648e-09	2.57891e-05		Resource use, minerals and metals	kg Sb eq	2.31856e-05	9.86731e-11	8.37666e-08	2.09417e-06	1.5435e-09	8.13928e-10	9.75947e-08	3.94865e-08	2.79222e-06	3.08679e-09	3.73648e-09	2.83021e-05
	Climate change - Fossil	kg CO2 eq	0.330701	0.00337243	0.00357078	0.0892696	4.24758e-05	1.59886e-05	0.00556468	0.0125335	0.0119026	0.000105634	0.0428314	0.49991		Climate change - Fossil	kg CO2 eq	0.330701	0.00337243	0.00357078	0.0892696	4.24758e-05	1.59886e-05	0.00556468	0.0125335	0.119026	0.000105634	0.0428314	0.607034
	Climate change - Biogenic	kg CO2 eq	0.00317501	-3.8366e-05	1.83661e-06	4.59153e-05	1.25274e-08	-7.11704e-09	0.00452275	0.00124799	6.12204e-06	2.4169e-06	-6.12064e-05	0.00890247		Climate change - Biogenic	kg CO2 eq	0.00317501	-3.8366e-05	1.83661e-06	4.59153e-05	1.25274e-08	-7.11704e-09	0.00452275	0.00124799	6.12204e-05	2.4169e-06	-6.12064e-05	0.00895757
	Climate change - Land use and LU change	kg CO2 eq	0.000105076	0	1.39574e-06	3.48936e-05	1.07024e-07	4.31495e-08	3.34016e-05	1.22948e-05	4.65248e-06	1.96648e-07	0	0.000192061		Climate change - Land use and LU change	kg CO2 eq	0.000105076	0	1.39574e-06	3.48936e-05	1.07024e-07	4.31495e-08	3.34016e-05	1.22948e-05	4.65248e-05	1.96648e-07	0	0.000233933
	Human toxicity, non-cancer - organics	CTUh	3.75683e-11	1.24483e-13	5.90864e-12	1.47716e-10	5.95903e-14	5.63053e-14	2.06811e-11	2.65288e-12	1.96955e-11	3.16409e-14	3.42499e-13	2.34837e-10		Human toxicity, non-cancer - organics	CTUh	3.75683e-11	1.24483e-13	5.90864e-12	1.47716e-10	5.95903e-14	5.63053e-14	2.06811e-11	2.65288e-12	1.96955e-10	3.16409e-14	3.42499e-13	4.12096e-10
	Human toxicity, non-cancer - inorganics	CTUh	3.84349e-10	4.08815e-12	1.00641e-11	2.51602e-10	4.65776e-13	1.78073e-13	6.33743e-11	1.13768e-11	3.35469e-11	5.6557e-13	2.16605e-11	7.81271e-10		Human toxicity, non-cancer - inorganics	CTUh	3.84349e-10	4.08815e-12	1.00641e-11	2.51602e-10	4.65776e-13	1.78073e-13	6.33743e-11	1.13768e-11	3.35469e-10	5.6557e-13	2.16605e-11	1.08319e-09
	Human toxicity, non-cancer - metals	CTUh	2.14731e-09	8.0397e-12	3.63706e-11	9.09264e-10	2.85397e-12	1.70737e-12	1.24214e-10	6.60075e-11	1.21235e-10	5.68413e-12	4.1789e-11	3.46447e-09		Human toxicity, non-cancer - metals	CTUh	2.14731e-09	8.0397e-12	3.63706e-11	9.09264e-10	2.85397e-12	1.70737e-12	1.24214e-10	6.60075e-11	1.21235e-09	5.68413e-12	4.1789e-11	4.55559e-09
	Human toxicity, cancer - organics	CTUh	3.3895e-11	1.04426e-13	8.40716e-13	2.10179e-11	6.84336e-14	2.63517e-14	1.64289e-11	1.09191e-12	2.80239e-12	8.36478e-14	2.09663e-12	7.84563e-11		Human toxicity, cancer - organics	CTUh	3.3895e-11	1.04426e-13	8.40716e-13	2.10179e-11	6.84336e-14	2.63517e-14	1.64289e-11	1.09191e-12	2.80239e-11	8.36478e-14	2.09663e-12	1.03678e-10
	Human toxicity, cancer - inorganics	CTUh	0	0	7.28961e-21	1.8224e-19	2.18973e-22	8.35363e-23	5.36536e-20	2.52748e-20	2.42987e-20	4.69048e-22	0	2.93528e-19		Human toxicity, cancer - inorganics	CTUh	0	0	7.28961e-21	1.8224e-19	2.18973e-22	8.35363e-23	5.36536e-20	2.52748e-20	2.42987e-19	4.69048e-22	0	5.12217e-19
	Human toxicity, cancer - metals	CTUh	3.26428e-11	1.08827e-13	5.87369e-13	1.46842e-11	1.89807e-13	7.70585e-14	3.04065e-12	1.6911e-12	1.9579e-12	1.63717e-13	1.62092e-12	5.67644e-11		Human toxicity, cancer - metals	CTUh	3.26428e-11	1.08827e-13	5.87369e-13	1.46842e-11	1.89807e-13	7.70585e-14	3.04065e-12	1.6911e-12	1.9579e-11	1.63717e-13	1.62092e-12	7.43854e-11
	Ecotoxicity, freshwater - organics	CTUe	0.0413495	9.88623e-05	0.00325729	0.0814322	1.46986e-05	8.96591e-06	0.00859909	0.0022292	0.0108576	3.52606e-05	0.000426527	0.148309		Ecotoxicity, freshwater - organics	CTUe	0.0413495	9.88623e-05	0.00325729	0.0814322	1.46986e-05	8.96591e-06	0.00859909	0.0022292	0.108576	3.52606e-05	0.000426527	0.246028
	Ecotoxicity, freshwater - inorganics	CTUe	0.267384	0.00361191	0.0114607	0.286517	0.00011231	8.2116e-05	0.0200225	0.0130356	0.0382023	0.0001829	0.13538	0.775992		Ecotoxicity, freshwater - inorganics	CTUe	0.267384	0.00361191	0.0114607	0.286517	0.00011231	8.2116e-05	0.0200225	0.0130356	0.382023	0.0001829	0.13538	1.11981
	Ecotoxicity, freshwater - metals	CTUe	4.30095	0.00916618	0.0296143	0.740357	0.00132745	0.000962412	2.77234	0.199035	0.0987143	0.00183295	0.0323089	8.18662		Ecotoxicity, freshwater - metals	CTUe	4.30095	0.00916618	0.0296143	0.740357	0.00132745	0.000962412	2.77234	0.199035	0.987143	0.00183295	0.0323089	9.07504
	RIF 2
	Categoria d'impatto	Unità	INVARIANTE	T. Sabbia_ Transport, freight, lorry, unspecified {RER}| market for transport, freight, lorry, unspecified | APOS, U	km distanza fabbrica malta - azienda HP	A4_ Transport, freight, lorry, unspecified {RER}| market for transport, freight, lorry, unspecified | APOS, U	km distanza tra fabbrica malta e cantiere	SOMMA
	Climate change	kg CO2 eq	0.407741	0.000178701	500	0.000238268	50	0.509005
	Ozone depletion	kg CFC11 eq	1.54097e-08	4.10308e-11	500	5.47077e-11	50	3.86604e-08
	Ionising radiation	kBq U-235 eq	0.0118152	1.42312e-05	500	1.89749e-05	50	0.0198796
	Photochemical ozone formation	kg NMVOC eq	0.000970614	1.13834e-06	500	1.51779e-06	50	0.00161567
	Particulate matter	disease inc.	1.11836e-08	1.61621e-11	500	2.15494e-11	50	2.03421e-08
	Human toxicity, non-cancer	CTUh	2.98383e-09	2.61168e-12	500	3.48224e-12	50	4.46378e-09
	Human toxicity, cancer	CTUh	9.47582e-11	7.14043e-14	500	9.52057e-14	50	1.35221e-10
	Acidification	mol H+ eq	0.00125701	1.01272e-06	500	1.3503e-06	50	0.00183089
	Eutrophication, freshwater	kg P eq	4.83863e-05	1.3403e-08	500	1.78706e-08	50	5.59814e-05
	Eutrophication, marine	kg N eq	0.00034574	3.65381e-07	500	4.87175e-07	50	0.00055279
	Eutrophication, terrestrial	mol N eq	0.00381141	3.99374e-06	500	5.32498e-06	50	0.00607453
	Ecotoxicity, freshwater	CTUe	7.85483	0.00221661	500	0.00295548	50	9.11092
	Land use	Pt	2.97982	0.00314271	500	0.00419028	50	4.76069
	Water use	m3 depriv.	0.0744334	9.04878e-06	500	1.2065e-05	50	0.079561
	Resource use, fossils	MJ	2.53331	0.00272427	500	0.00363236	50	4.07706
	Resource use, minerals and metals	kg Sb eq	2.34158e-05	4.18833e-09	500	5.58444e-09	50	2.57891e-05
	Climate change - Fossil	kg CO2 eq	0.398738	0.000178539	500	0.000238052	50	0.49991
	Climate change - Biogenic	kg CO2 eq	0.00885043	9.18306e-08	500	1.22441e-07	50	0.00890247
	Climate change - Land use and LU change	kg CO2 eq	0.000152515	6.97872e-08	500	9.30496e-08	50	0.000192061
	Human toxicity, non-cancer - organics	CTUh	6.74255e-11	2.95432e-13	500	3.93909e-13	50	2.34837e-10
	Human toxicity, non-cancer - inorganics	CTUh	4.96122e-10	5.03203e-13	500	6.70938e-13	50	7.81271e-10
	Human toxicity, non-cancer - metals	CTUh	2.43397e-09	1.81853e-12	500	2.42471e-12	50	3.46447e-09
	Human toxicity, cancer - organics	CTUh	5.4636e-11	4.20358e-14	500	5.60478e-14	50	7.84563e-11
	Human toxicity, cancer - inorganics	CTUh	8.69896e-20	3.6448e-22	500	4.85974e-22	50	2.93528e-19
	Human toxicity, cancer - metals	CTUh	4.01223e-11	2.93684e-14	500	3.91579e-14	50	5.67644e-11
	Ecotoxicity, freshwater - organics	CTUe	0.0560194	0.000162864	500	0.000217153	50	0.148309
	Ecotoxicity, freshwater - inorganics	CTUe	0.451272	0.000573035	500	0.000764047	50	0.775992
	Ecotoxicity, freshwater - metals	CTUe	7.34754	0.00148071	500	0.00197429	50	8.18662
	Non rinnovabile	MJ	2.70322	0.00289223	500	0.00385631	50	4.34215
	Rinnovabile	MJ	0.443768	4.15989e-05	500	5.54653e-05	50	0.467341

## Sheet: RIF2 (CED)
								Scenario SB-1A
	Calculation:	Analizza					Trasporto	RIF											Calculation:	Analizza					Trasporto	RIF												Calculation:	Analizza
	Results:	Valutazione dell'impatto					Cemento	60											Results:	Valutazione dell'impatto					Cemento	60												Results:	Valutazione dell'impatto
	Product:	1 l 0. RIF - Mortar {Europe without Switzerland}| production | APOS, U - A1-A5 (del progetto					Sabbia	0											Product:	1 l 0. RIF - Mortar {Europe without Switzerland}| production | APOS, U - A1-A5 (del progetto					Sabbia	0												Product:	1 l 0. RIF2 - Mortar {Europe without Switzerland}| production | APOS, U - A1-A5 (del progetto
	Metodo:	Cumulative Energy Demand V1.11 / Cumulative energy demand						-											Metodo:	Cumulative Energy Demand V1.11 / Cumulative energy demand					0	-												Metodo:	Cumulative Energy Demand V1.11 / Cumulative energy demand
	Indicatore:	Caratterizzazione						-											Indicatore:	Caratterizzazione					0	-												Indicatore:	Caratterizzazione
	Skip categories:	Mai					Fabbrica-cantiere	50											Skip categories:	Mai					Fabbrica-cantiere	500												Skip categories:	Con risultato = 0
	Esclude processi di infrastrutture:	No						-											Esclude processi di infrastrutture:	No					0	-												Esclude processi di infrastrutture:	No
	Esclude le emissioni di lungo termine:	No																	Esclude le emissioni di lungo termine:	No																		Esclude le emissioni di lungo termine:	No
	Sorted on item:	Categoria d'impatto																	Sorted on item:	Categoria d'impatto																		Sorted on item:	Categoria d'impatto
	Sort order:	Ascendente																	Sort order:	Ascendente																		Sort order:	Ascendente
	Categoria d'impatto	Unità	Cement, limestone 6-20% {RoW}| cement production, limestone 6-20% | Cut-off, U	Sand 0/2 mm, wet and dry quarry, production mix, at plant, undried RER S -	Conveyor belt {GLO}| market for | APOS, U	Industrial machine, heavy, unspecified {RoW}| market for industrial machine, heavy, unspecified | APOS, U	Packing, cement {RoW}| processing | APOS, U	T. Cemento_ Transport, freight, lorry, unspecified {RER}| market for transport, freight, lorry, unspecified | APOS, U	T. Sabbia_ Transport, freight, lorry, unspecified {RER}| market for transport, freight, lorry, unspecified | APOS, U	A4_ Transport, freight, lorry, unspecified {RER}| market for transport, freight, lorry, unspecified | APOS, U	A5 - Tap water {Europe without Switzerland}| market for | APOS, U	Electricity, medium voltage {IT}| market for | APOS, U	A5 - Electricity grid mix, AC, consumption mix, at consumer, 230V IT S	Totale					Categoria d'impatto	Unità	Cement, limestone 6-20% {RoW}| cement production, limestone 6-20% | Cut-off, U	Sand 0/2 mm, wet and dry quarry, production mix, at plant, undried RER S -	Conveyor belt {GLO}| market for | APOS, U	Industrial machine, heavy, unspecified {RoW}| market for industrial machine, heavy, unspecified | APOS, U	Packing, cement {RoW}| processing | APOS, U	T. Cemento_ Transport, freight, lorry, unspecified {RER}| market for transport, freight, lorry, unspecified | APOS, U	T. Sabbia_ Transport, freight, lorry, unspecified {RER}| market for transport, freight, lorry, unspecified | APOS, U	A4_ Transport, freight, lorry, unspecified {RER}| market for transport, freight, lorry, unspecified | APOS, U	A5 - Tap water {Europe without Switzerland}| market for | APOS, U	Electricity, medium voltage {IT}| market for | APOS, U	A5 - Electricity grid mix, AC, consumption mix, at consumer, 230V IT S	Totale	0	0				Categoria d'impatto	Unità	Totale	0. RIF2 - Mortar {Europe without Switzerland}| production | APOS, U - A1-A5	Cement, limestone 6-20% {RoW}| cement production, limestone 6-20% | Cut-off, U	Sand 0/2 mm, wet and dry quarry, production mix, at plant, undried RER S -	Conveyor belt {GLO}| market for | APOS, U	Industrial machine, heavy, unspecified {RoW}| market for industrial machine, heavy, unspecified | APOS, U	Packing, cement {RoW}| processing | APOS, U	T. Cemento_ Transport, freight, lorry, unspecified {RER}| market for transport, freight, lorry, unspecified | APOS, U	A4_ Transport, freight, lorry, unspecified {RER}| market for transport, freight, lorry, unspecified | APOS, U	A5 - Tap water {Europe without Switzerland}| market for | APOS, U
	Non renewable, fossil	MJ	1.58397	0.0420042	0.000401129	0.0001531	0.0827064	0.0566579	0	0.18886	0.0012122	0.174648	0.590263	2.72088	2.89603	PE-Nr			Non renewable, fossil	MJ	1.58397	0.0420042	0.000401129	0.0001531	0.0827064	0.0566579	0	1.8886	0.0012122	0.174648	0.590263	4.42061	4.63137	PE-Nr				Non renewable, fossil	MJ	2.72088	0	1.58397	0.0420042	0.000401129	0.0001531	0.0827064	0.0566579	0.18886	0.0012122
	Non-renewable, nuclear	MJ	0.0618382	0.0180373	3.37083e-05	1.62609e-05	0.00888776	0.00118525	0	0.00395084	0.000618312	0.0268626	0.0536274	0.175058					Non-renewable, nuclear	MJ	0.0618382	0.0180373	3.37083e-05	1.62609e-05	0.00888776	0.00118525	0	0.0395084	0.000618312	0.0268626	0.0536274	0.210615						Non-renewable, nuclear	MJ	0.175058	0	0.0618382	0.0180373	3.37083e-05	1.62609e-05	0.00888776	0.00118525	0.00395084	0.000618312
	Non-renewable, biomass	MJ	2.59786e-05	0	1.30025e-07	5.79669e-08	3.94544e-05	1.46786e-06	0	4.89287e-06	9.16231e-08	2.72832e-05	0	9.93566e-05					Non-renewable, biomass	MJ	2.59786e-05	0	1.30025e-07	5.79669e-08	3.94544e-05	1.46786e-06	0	4.89287e-05	9.16231e-08	2.72832e-05	0	0.000143392						Non-renewable, biomass	MJ	9.93566e-05	0	2.59786e-05	0	1.30025e-07	5.79669e-08	3.94544e-05	1.46786e-06	4.89287e-06	9.16231e-08
	Renewable, biomass	MJ	0.0307156	2.21709e-07	9.54816e-06	5.15515e-06	0.216821	0.000281919	0	0.000939731	6.56601e-05	0.0106926	0	0.259531	0.446541	PE-Re			Renewable, biomass	MJ	0.0307156	2.21709e-07	9.54816e-06	5.15515e-06	0.216821	0.000281919	0	0.00939731	6.56601e-05	0.0106926	0	0.267989	0.471501	PE-Re				Renewable, biomass	MJ	0.259531	0	0.0307156	2.21709e-07	9.54816e-06	5.15515e-06	0.216821	0.000281919	0.000939731	6.56601e-05
	Renewable, wind, solar, geothe	MJ	0.00939979	8.8283e-05	3.75769e-06	1.3538e-06	0.000936089	0.00011831	0	0.000394366	6.27699e-05	0.0119045	0.0200632	0.0429724					Renewable, wind, solar, geothe	MJ	0.00939979	8.8283e-05	3.75769e-06	1.3538e-06	0.000936089	0.00011831	0	0.00394366	6.27699e-05	0.0119045	0.0200632	0.0465217						Renewable, wind, solar, geothe	MJ	0.0429724	0	0.00939979	8.8283e-05	3.75769e-06	1.3538e-06	0.000936089	0.00011831	0.000394366	6.27699e-05
	Renewable, water	MJ	0.0514778	0.00221042	2.56538e-05	1.02732e-05	0.00302298	0.00043175	0	0.00143917	0.000117592	0.023599	0.0617028	0.144038					Renewable, water	MJ	0.0514778	0.00221042	2.56538e-05	1.02732e-05	0.00302298	0.00043175	0	0.0143917	0.000117592	0.023599	0.0617028	0.15699						Renewable, water	MJ	0.144038	0	0.0514778	0.00221042	2.56538e-05	1.02732e-05	0.00302298	0.00043175	0.00143917	0.000117592
	Non rinnovabile	MJ	1.64584	0.0600415	0.000434967	0.000169419	0.0916336	0.0578446	0	0.192815	0.0018306	0.201537	0.64389	2.89603					Non rinnovabile	MJ	1.64584	0.0600415	0.000434967	0.000169419	0.0916336	0.0578446	0	1.92815	0.0018306	0.201537	0.64389	4.63137
	Rinnovabile	MJ	0.0915932	0.00229893	3.89597e-05	1.67822e-05	0.22078	0.000831979	0	0.00277326	0.000246022	0.0461961	0.0817661	0.446541					Rinnovabile	MJ	0.0915932	0.00229893	3.89597e-05	1.67822e-05	0.22078	0.000831979	0	0.0277326	0.000246022	0.0461961	0.0817661	0.471501
	Calculation:	Analizza						Scenario SB-1A
	Results:	Valutazione dell'impatto					Trasporto	RIF
	Product:	1 l 0. RIF - Mortar {Europe without Switzerland}| production | APOS, U - A1-A5 (del progetto					Cemento	60
	Metodo:	Cumulative Energy Demand V1.11 / Cumulative energy demand					Sabbia	100																		100
		Caratterizzazione						-
	Skip categories:	Mai						-
	Esclude processi di infrastrutture:	No					Fabbrica-cantiere	50																		500
	Esclude le emissioni di lungo termine:	No						-
	Sorted on item:	Categoria d'impatto
	Sort order:	Ascendente
	Categoria d'impatto	Unità	Cement, limestone 6-20% {RoW}| cement production, limestone 6-20% | Cut-off, U	Sand 0/2 mm, wet and dry quarry, production mix, at plant, undried RER S -	Conveyor belt {GLO}| market for | APOS, U	Industrial machine, heavy, unspecified {RoW}| market for industrial machine, heavy, unspecified | APOS, U	Packing, cement {RoW}| processing | APOS, U	T. Cemento_ Transport, freight, lorry, unspecified {RER}| market for transport, freight, lorry, unspecified | APOS, U	T. Sabbia_ Transport, freight, lorry, unspecified {RER}| market for transport, freight, lorry, unspecified | APOS, U	A4_ Transport, freight, lorry, unspecified {RER}| market for transport, freight, lorry, unspecified | APOS, U	A5 - Tap water {Europe without Switzerland}| market for | APOS, U	Electricity, medium voltage {IT}| market for | APOS, U	A5 - Electricity grid mix, AC, consumption mix, at consumer, 230V IT S	Totale					Categoria d'impatto	Unità	Cement, limestone 6-20% {RoW}| cement production, limestone 6-20% | Cut-off, U	Sand 0/2 mm, wet and dry quarry, production mix, at plant, undried RER S -	Conveyor belt {GLO}| market for | APOS, U	Industrial machine, heavy, unspecified {RoW}| market for industrial machine, heavy, unspecified | APOS, U	Packing, cement {RoW}| processing | APOS, U	T. Cemento_ Transport, freight, lorry, unspecified {RER}| market for transport, freight, lorry, unspecified | APOS, U	T. Sabbia_ Transport, freight, lorry, unspecified {RER}| market for transport, freight, lorry, unspecified | APOS, U	A4_ Transport, freight, lorry, unspecified {RER}| market for transport, freight, lorry, unspecified | APOS, U	A5 - Tap water {Europe without Switzerland}| market for | APOS, U	Electricity, medium voltage {IT}| market for | APOS, U	A5 - Electricity grid mix, AC, consumption mix, at consumer, 230V IT S	Totale	0	0
	Non renewable, fossil	MJ	1.58397	0.0420042	0.000401129	0.0001531	0.0827064	0.0566579	0.283289	0.18886	0.0012122	0.174648	0.590263	3.00417	3.18526	PE-Nr			Non renewable, fossil	MJ	1.58397	0.0420042	0.000401129	0.0001531	0.0827064	0.0566579	0.283289	1.8886	0.0012122	0.174648	0.590263	4.7039	4.9206	PE-Nr
	Non-renewable, nuclear	MJ	0.0618382	0.0180373	3.37083e-05	1.62609e-05	0.00888776	0.00118525	0.00592627	0.00395084	0.000618312	0.0268626	0.0536274	0.180984					Non-renewable, nuclear	MJ	0.0618382	0.0180373	3.37083e-05	1.62609e-05	0.00888776	0.00118525	0.00592627	0.0395084	0.000618312	0.0268626	0.0536274	0.216541
	Non-renewable, biomass	MJ	2.59786e-05	0	1.30025e-07	5.79669e-08	3.94544e-05	1.46786e-06	7.33931e-06	4.89287e-06	9.16231e-08	2.72832e-05	0	0.000106696					Non-renewable, biomass	MJ	2.59786e-05	0	1.30025e-07	5.79669e-08	3.94544e-05	1.46786e-06	7.33931e-06	4.89287e-05	9.16231e-08	2.72832e-05	0	0.000150732
	Renewable, biomass	MJ	0.0307156	2.21709e-07	9.54816e-06	5.15515e-06	0.216821	0.000281919	0.0014096	0.000939731	6.56601e-05	0.0106926	0	0.260941	0.450701	PE-Re			Renewable, biomass	MJ	0.0307156	2.21709e-07	9.54816e-06	5.15515e-06	0.216821	0.000281919	0.0014096	0.00939731	6.56601e-05	0.0106926	0	0.269399	0.475661	PE-Re
	Renewable, wind, solar, geothe	MJ	0.00939979	8.8283e-05	3.75769e-06	1.3538e-06	0.000936089	0.00011831	0.000591549	0.000394366	6.27699e-05	0.0119045	0.0200632	0.043564					Renewable, wind, solar, geothe	MJ	0.00939979	8.8283e-05	3.75769e-06	1.3538e-06	0.000936089	0.00011831	0.000591549	0.00394366	6.27699e-05	0.0119045	0.0200632	0.0471133
	Renewable, water	MJ	0.0514778	0.00221042	2.56538e-05	1.02732e-05	0.00302298	0.00043175	0.00215875	0.00143917	0.000117592	0.023599	0.0617028	0.146196					Renewable, water	MJ	0.0514778	0.00221042	2.56538e-05	1.02732e-05	0.00302298	0.00043175	0.00215875	0.0143917	0.000117592	0.023599	0.0617028	0.159149
								Scenario SB-1A																		Scenario SB-1A
	Calculation:	Analizza					Trasporto	RIF											Calculation:	Analizza					Trasporto	RIF
	Results:	Valutazione dell'impatto					Cemento	60											Results:	Valutazione dell'impatto					Cemento	60
	Product:	1 l 0. RIF - Mortar {Europe without Switzerland}| production | APOS, U - A1-A5 (del progetto					Sabbia	200											Product:	1 l 0. RIF - Mortar {Europe without Switzerland}| production | APOS, U - A1-A5 (del progetto					Sabbia	200
	Metodo:	Cumulative Energy Demand V1.11 / Cumulative energy demand						-											Metodo:	Cumulative Energy Demand V1.11 / Cumulative energy demand					0	-
	Indicatore:	Caratterizzazione						-											Indicatore:	Caratterizzazione					0	-
	Skip categories:	Mai					Fabbrica-cantiere	50											Skip categories:	Mai					Fabbrica-cantiere	500
	Esclude processi di infrastrutture:	No						-											Esclude processi di infrastrutture:	No					0	-
	Esclude le emissioni di lungo termine:	No																	Esclude le emissioni di lungo termine:	No
	Sorted on item:	Categoria d'impatto																	Sorted on item:	Categoria d'impatto
	Sort order:	Ascendente																	Sort order:	Ascendente
	Categoria d'impatto	Unità	Cement, limestone 6-20% {RoW}| cement production, limestone 6-20% | Cut-off, U	Sand 0/2 mm, wet and dry quarry, production mix, at plant, undried RER S -	Conveyor belt {GLO}| market for | APOS, U	Industrial machine, heavy, unspecified {RoW}| market for industrial machine, heavy, unspecified | APOS, U	Packing, cement {RoW}| processing | APOS, U	T. Cemento_ Transport, freight, lorry, unspecified {RER}| market for transport, freight, lorry, unspecified | APOS, U	T. Sabbia_ Transport, freight, lorry, unspecified {RER}| market for transport, freight, lorry, unspecified | APOS, U	A4_ Transport, freight, lorry, unspecified {RER}| market for transport, freight, lorry, unspecified | APOS, U	A5 - Tap water {Europe without Switzerland}| market for | APOS, U	Electricity, medium voltage {IT}| market for | APOS, U	A5 - Electricity grid mix, AC, consumption mix, at consumer, 230V IT S	Totale					Categoria d'impatto	Unità	Cement, limestone 6-20% {RoW}| cement production, limestone 6-20% | Cut-off, U	Sand 0/2 mm, wet and dry quarry, production mix, at plant, undried RER S -	Conveyor belt {GLO}| market for | APOS, U	Industrial machine, heavy, unspecified {RoW}| market for industrial machine, heavy, unspecified | APOS, U	Packing, cement {RoW}| processing | APOS, U	T. Cemento_ Transport, freight, lorry, unspecified {RER}| market for transport, freight, lorry, unspecified | APOS, U	T. Sabbia_ Transport, freight, lorry, unspecified {RER}| market for transport, freight, lorry, unspecified | APOS, U	A4_ Transport, freight, lorry, unspecified {RER}| market for transport, freight, lorry, unspecified | APOS, U	A5 - Tap water {Europe without Switzerland}| market for | APOS, U	Electricity, medium voltage {IT}| market for | APOS, U	A5 - Electricity grid mix, AC, consumption mix, at consumer, 230V IT S	Totale	0	0
	Non renewable, fossil	MJ	1.58397	0.0420042	0.000401129	0.0001531	0.0827064	0.0566579	0.566579	0.18886	0.0012122	0.174648	0.590263	3.28746	3.47448	PE-Nr			Non renewable, fossil	MJ	1.58397	0.0420042	0.000401129	0.0001531	0.0827064	0.0566579	0.566579	1.8886	0.0012122	0.174648	0.590263	4.98719	5.20982	PE-Nr
	Non-renewable, nuclear	MJ	0.0618382	0.0180373	3.37083e-05	1.62609e-05	0.00888776	0.00118525	0.0118525	0.00395084	0.000618312	0.0268626	0.0536274	0.18691					Non-renewable, nuclear	MJ	0.0618382	0.0180373	3.37083e-05	1.62609e-05	0.00888776	0.00118525	0.0118525	0.0395084	0.000618312	0.0268626	0.0536274	0.222468
	Non-renewable, biomass	MJ	2.59786e-05	0	1.30025e-07	5.79669e-08	3.94544e-05	1.46786e-06	1.46786e-05	4.89287e-06	9.16231e-08	2.72832e-05	0	0.000114035					Non-renewable, biomass	MJ	2.59786e-05	0	1.30025e-07	5.79669e-08	3.94544e-05	1.46786e-06	1.46786e-05	4.89287e-05	9.16231e-08	2.72832e-05	0	0.000158071
	Renewable, biomass	MJ	0.0307156	2.21709e-07	9.54816e-06	5.15515e-06	0.216821	0.000281919	0.00281919	0.000939731	6.56601e-05	0.0106926	0	0.262351	0.454861	PE-Re			Renewable, biomass	MJ	0.0307156	2.21709e-07	9.54816e-06	5.15515e-06	0.216821	0.000281919	0.00281919	0.00939731	6.56601e-05	0.0106926	0	0.270808	0.47982	PE-Re
	Renewable, wind, solar, geothe	MJ	0.00939979	8.8283e-05	3.75769e-06	1.3538e-06	0.000936089	0.00011831	0.0011831	0.000394366	6.27699e-05	0.0119045	0.0200632	0.0441555					Renewable, wind, solar, geothe	MJ	0.00939979	8.8283e-05	3.75769e-06	1.3538e-06	0.000936089	0.00011831	0.0011831	0.00394366	6.27699e-05	0.0119045	0.0200632	0.0477048
	Renewable, water	MJ	0.0514778	0.00221042	2.56538e-05	1.02732e-05	0.00302298	0.00043175	0.0043175	0.00143917	0.000117592	0.023599	0.0617028	0.148355					Renewable, water	MJ	0.0514778	0.00221042	2.56538e-05	1.02732e-05	0.00302298	0.00043175	0.0043175	0.0143917	0.000117592	0.023599	0.0617028	0.161307
	Calculation:	Analizza																	Calculation:	Analizza					0	0
	Results:	Valutazione dell'impatto						Scenario SB-1A											Results:	Valutazione dell'impatto					0	Scenario SB-1A
	Product:	1 l 0. RIF - Mortar {Europe without Switzerland}| production | APOS, U - A1-A5 (del progetto					Trasporto	RIF											Product:	1 l 0. RIF - Mortar {Europe without Switzerland}| production | APOS, U - A1-A5 (del progetto					Trasporto	RIF
	Metodo:	Cumulative Energy Demand V1.11 / Cumulative energy demand					Cemento	60											Metodo:	Cumulative Energy Demand V1.11 / Cumulative energy demand					Cemento	60
	Indicatore:	Caratterizzazione					Sabbia	300											Indicatore:	Caratterizzazione					Sabbia	300
	Skip categories:	Mai						-											Skip categories:	Mai					0	-
	Esclude processi di infrastrutture:	No						-											Esclude processi di infrastrutture:	No					0	-
	Esclude le emissioni di lungo termine:	No					Fabbrica-cantiere	50											Esclude le emissioni di lungo termine:	No					Fabbrica-cantiere	500
	Sorted on item:	Categoria d'impatto						-											Sorted on item:	Categoria d'impatto					0	-
	Sort order:	Ascendente																	Sort order:	Ascendente					0	0
																									0	0
	Categoria d'impatto	Unità	Cement, limestone 6-20% {RoW}| cement production, limestone 6-20% | Cut-off, U	Sand 0/2 mm, wet and dry quarry, production mix, at plant, undried RER S -	Conveyor belt {GLO}| market for | APOS, U	Industrial machine, heavy, unspecified {RoW}| market for industrial machine, heavy, unspecified | APOS, U	Packing, cement {RoW}| processing | APOS, U	T. Cemento_ Transport, freight, lorry, unspecified {RER}| market for transport, freight, lorry, unspecified | APOS, U	T. Sabbia_ Transport, freight, lorry, unspecified {RER}| market for transport, freight, lorry, unspecified | APOS, U	A4_ Transport, freight, lorry, unspecified {RER}| market for transport, freight, lorry, unspecified | APOS, U	A5 - Tap water {Europe without Switzerland}| market for | APOS, U	Electricity, medium voltage {IT}| market for | APOS, U	A5 - Electricity grid mix, AC, consumption mix, at consumer, 230V IT S	Totale					Categoria d'impatto	Unità	Cement, limestone 6-20% {RoW}| cement production, limestone 6-20% | Cut-off, U	Sand 0/2 mm, wet and dry quarry, production mix, at plant, undried RER S -	Conveyor belt {GLO}| market for | APOS, U	Industrial machine, heavy, unspecified {RoW}| market for industrial machine, heavy, unspecified | APOS, U	Packing, cement {RoW}| processing | APOS, U	T. Cemento_ Transport, freight, lorry, unspecified {RER}| market for transport, freight, lorry, unspecified | APOS, U	T. Sabbia_ Transport, freight, lorry, unspecified {RER}| market for transport, freight, lorry, unspecified | APOS, U	A4_ Transport, freight, lorry, unspecified {RER}| market for transport, freight, lorry, unspecified | APOS, U	A5 - Tap water {Europe without Switzerland}| market for | APOS, U	Electricity, medium voltage {IT}| market for | APOS, U	A5 - Electricity grid mix, AC, consumption mix, at consumer, 230V IT S	Totale	0	0
	Non renewable, fossil	MJ	1.58397	0.0420042	0.000401129	0.0001531	0.0827064	0.0566579	0.849868	0.18886	0.0012122	0.174648	0.590263	3.57075	3.7637	PE-Nr			Non renewable, fossil	MJ	1.58397	0.0420042	0.000401129	0.0001531	0.0827064	0.0566579	0.849868	1.8886	0.0012122	0.174648	0.590263	5.27048	5.49904	PE-Nr
	Non-renewable, nuclear	MJ	0.0618382	0.0180373	3.37083e-05	1.62609e-05	0.00888776	0.00118525	0.0177788	0.00395084	0.000618312	0.0268626	0.0536274	0.192836					Non-renewable, nuclear	MJ	0.0618382	0.0180373	3.37083e-05	1.62609e-05	0.00888776	0.00118525	0.0177788	0.0395084	0.000618312	0.0268626	0.0536274	0.228394
	Non-renewable, biomass	MJ	2.59786e-05	0	1.30025e-07	5.79669e-08	3.94544e-05	1.46786e-06	2.20179e-05	4.89287e-06	9.16231e-08	2.72832e-05	0	0.000121375					Non-renewable, biomass	MJ	2.59786e-05	0	1.30025e-07	5.79669e-08	3.94544e-05	1.46786e-06	2.20179e-05	4.89287e-05	9.16231e-08	2.72832e-05	0	0.00016541
	Renewable, biomass	MJ	0.0307156	2.21709e-07	9.54816e-06	5.15515e-06	0.216821	0.000281919	0.00422879	0.000939731	6.56601e-05	0.0106926	0	0.26376	0.459021	PE-Re			Renewable, biomass	MJ	0.0307156	2.21709e-07	9.54816e-06	5.15515e-06	0.216821	0.000281919	0.00422879	0.00939731	6.56601e-05	0.0106926	0	0.272218	0.48398	PE-Re
	Renewable, wind, solar, geothe	MJ	0.00939979	8.8283e-05	3.75769e-06	1.3538e-06	0.000936089	0.00011831	0.00177465	0.000394366	6.27699e-05	0.0119045	0.0200632	0.0447471					Renewable, wind, solar, geothe	MJ	0.00939979	8.8283e-05	3.75769e-06	1.3538e-06	0.000936089	0.00011831	0.00177465	0.00394366	6.27699e-05	0.0119045	0.0200632	0.0482964
	Renewable, water	MJ	0.0514778	0.00221042	2.56538e-05	1.02732e-05	0.00302298	0.00043175	0.00647624	0.00143917	0.000117592	0.023599	0.0617028	0.150514					Renewable, water	MJ	0.0514778	0.00221042	2.56538e-05	1.02732e-05	0.00302298	0.00043175	0.00647624	0.0143917	0.000117592	0.023599	0.0617028	0.163466
	Calculation:	Analizza																	Calculation:	Analizza
	Results:	Valutazione dell'impatto						Scenario SB-1A											Results:	Valutazione dell'impatto					0	Scenario SB-1A
	Product:	1 l 0. RIF - Mortar {Europe without Switzerland}| production | APOS, U - A1-A5 (del progetto					Trasporto	RIF											Product:	1 l 0. RIF - Mortar {Europe without Switzerland}| production | APOS, U - A1-A5 (del progetto					Trasporto	RIF
	Metodo:	Cumulative Energy Demand V1.11 / Cumulative energy demand					Cemento	60											Metodo:	Cumulative Energy Demand V1.11 / Cumulative energy demand					Cemento	60
	Indicatore:	Caratterizzazione					Sabbia	400											Indicatore:	Caratterizzazione					Sabbia	400
	Skip categories:	Mai						-											Skip categories:	Mai					0	-
	Esclude processi di infrastrutture:	No						-											Esclude processi di infrastrutture:	No					0	-
	Esclude le emissioni di lungo termine:	No					Fabbrica-cantiere	50											Esclude le emissioni di lungo termine:	No					Fabbrica-cantiere	500
	Sorted on item:	Categoria d'impatto						-											Sorted on item:	Categoria d'impatto					0	-
	Sort order:	Ascendente																	Sort order:	Ascendente
																			0	0
	Categoria d'impatto	Unità	Cement, limestone 6-20% {RoW}| cement production, limestone 6-20% | Cut-off, U	Sand 0/2 mm, wet and dry quarry, production mix, at plant, undried RER S -	Conveyor belt {GLO}| market for | APOS, U	Industrial machine, heavy, unspecified {RoW}| market for industrial machine, heavy, unspecified | APOS, U	Packing, cement {RoW}| processing | APOS, U	T. Cemento_ Transport, freight, lorry, unspecified {RER}| market for transport, freight, lorry, unspecified | APOS, U	T. Sabbia_ Transport, freight, lorry, unspecified {RER}| market for transport, freight, lorry, unspecified | APOS, U	A4_ Transport, freight, lorry, unspecified {RER}| market for transport, freight, lorry, unspecified | APOS, U	A5 - Tap water {Europe without Switzerland}| market for | APOS, U	Electricity, medium voltage {IT}| market for | APOS, U	A5 - Electricity grid mix, AC, consumption mix, at consumer, 230V IT S	Totale					Categoria d'impatto	Unità	Cement, limestone 6-20% {RoW}| cement production, limestone 6-20% | Cut-off, U	Sand 0/2 mm, wet and dry quarry, production mix, at plant, undried RER S -	Conveyor belt {GLO}| market for | APOS, U	Industrial machine, heavy, unspecified {RoW}| market for industrial machine, heavy, unspecified | APOS, U	Packing, cement {RoW}| processing | APOS, U	T. Cemento_ Transport, freight, lorry, unspecified {RER}| market for transport, freight, lorry, unspecified | APOS, U	T. Sabbia_ Transport, freight, lorry, unspecified {RER}| market for transport, freight, lorry, unspecified | APOS, U	A4_ Transport, freight, lorry, unspecified {RER}| market for transport, freight, lorry, unspecified | APOS, U	A5 - Tap water {Europe without Switzerland}| market for | APOS, U	Electricity, medium voltage {IT}| market for | APOS, U	A5 - Electricity grid mix, AC, consumption mix, at consumer, 230V IT S	Totale	0	0
	Non renewable, fossil	MJ	1.58397	0.0420042	0.000401129	0.0001531	0.0827064	0.0566579	1.13316	0.18886	0.0012122	0.174648	0.590263	3.85404	4.05293	PE-Nr			Non renewable, fossil	MJ	1.58397	0.0420042	0.000401129	0.0001531	0.0827064	0.0566579	1.13316	1.8886	0.0012122	0.174648	0.590263	5.55377	5.78827	PE-Nr
	Non-renewable, nuclear	MJ	0.0618382	0.0180373	3.37083e-05	1.62609e-05	0.00888776	0.00118525	0.0237051	0.00395084	0.000618312	0.0268626	0.0536274	0.198763					Non-renewable, nuclear	MJ	0.0618382	0.0180373	3.37083e-05	1.62609e-05	0.00888776	0.00118525	0.0237051	0.0395084	0.000618312	0.0268626	0.0536274	0.23432
	Non-renewable, biomass	MJ	2.59786e-05	0	1.30025e-07	5.79669e-08	3.94544e-05	1.46786e-06	2.93572e-05	4.89287e-06	9.16231e-08	2.72832e-05	0	0.000128714					Non-renewable, biomass	MJ	2.59786e-05	0	1.30025e-07	5.79669e-08	3.94544e-05	1.46786e-06	2.93572e-05	4.89287e-05	9.16231e-08	2.72832e-05	0	0.00017275
	Renewable, biomass	MJ	0.0307156	2.21709e-07	9.54816e-06	5.15515e-06	0.216821	0.000281919	0.00563839	0.000939731	6.56601e-05	0.0106926	0	0.26517	0.463181	PE-Re			Renewable, biomass	MJ	0.0307156	2.21709e-07	9.54816e-06	5.15515e-06	0.216821	0.000281919	0.00563839	0.00939731	6.56601e-05	0.0106926	0	0.273627	0.48814	PE-Re
	Renewable, wind, solar, geothe	MJ	0.00939979	8.8283e-05	3.75769e-06	1.3538e-06	0.000936089	0.00011831	0.0023662	0.000394366	6.27699e-05	0.0119045	0.0200632	0.0453386					Renewable, wind, solar, geothe	MJ	0.00939979	8.8283e-05	3.75769e-06	1.3538e-06	0.000936089	0.00011831	0.0023662	0.00394366	6.27699e-05	0.0119045	0.0200632	0.0488879
	Renewable, water	MJ	0.0514778	0.00221042	2.56538e-05	1.02732e-05	0.00302298	0.00043175	0.00863499	0.00143917	0.000117592	0.023599	0.0617028	0.152673					Renewable, water	MJ	0.0514778	0.00221042	2.56538e-05	1.02732e-05	0.00302298	0.00043175	0.00863499	0.0143917	0.000117592	0.023599	0.0617028	0.165625
	Calculation:	Analizza																	Calculation:	Analizza
	Results:	Valutazione dell'impatto						Scenario SB-1A											Results:	Valutazione dell'impatto					0	Scenario SB-1A
	Product:	1 l 0. RIF - Mortar {Europe without Switzerland}| production | APOS, U - A1-A5 (del progetto					Trasporto	RIF											Product:	1 l 0. RIF - Mortar {Europe without Switzerland}| production | APOS, U - A1-A5 (del progetto					Trasporto	RIF
	Metodo:	Cumulative Energy Demand V1.11 / Cumulative energy demand					Cemento	60											Metodo:	Cumulative Energy Demand V1.11 / Cumulative energy demand					Cemento	60
	Indicatore:	Caratterizzazione					Sabbia	500											Indicatore:	Caratterizzazione					Sabbia	500
	Skip categories:	Mai						-											Skip categories:	Mai					0	-
	Esclude processi di infrastrutture:	No						-											Esclude processi di infrastrutture:	No					0	-
	Esclude le emissioni di lungo termine:	No					Fabbrica-cantiere	50											Esclude le emissioni di lungo termine:	No					Fabbrica-cantiere	500
	Sorted on item:	Categoria d'impatto						-											Sorted on item:	Categoria d'impatto					0	-
	Sort order:	Ascendente																	Sort order:	Ascendente
	Categoria d'impatto	Unità	Cement, limestone 6-20% {RoW}| cement production, limestone 6-20% | Cut-off, U	Sand 0/2 mm, wet and dry quarry, production mix, at plant, undried RER S -	Conveyor belt {GLO}| market for | APOS, U	Industrial machine, heavy, unspecified {RoW}| market for industrial machine, heavy, unspecified | APOS, U	Packing, cement {RoW}| processing | APOS, U	T. Cemento_ Transport, freight, lorry, unspecified {RER}| market for transport, freight, lorry, unspecified | APOS, U	T. Sabbia_ Transport, freight, lorry, unspecified {RER}| market for transport, freight, lorry, unspecified | APOS, U	A4_ Transport, freight, lorry, unspecified {RER}| market for transport, freight, lorry, unspecified | APOS, U	A5 - Tap water {Europe without Switzerland}| market for | APOS, U	Electricity, medium voltage {IT}| market for | APOS, U	A5 - Electricity grid mix, AC, consumption mix, at consumer, 230V IT S	Totale					Categoria d'impatto	Unità	Cement, limestone 6-20% {RoW}| cement production, limestone 6-20% | Cut-off, U	Sand 0/2 mm, wet and dry quarry, production mix, at plant, undried RER S -	Conveyor belt {GLO}| market for | APOS, U	Industrial machine, heavy, unspecified {RoW}| market for industrial machine, heavy, unspecified | APOS, U	Packing, cement {RoW}| processing | APOS, U	T. Cemento_ Transport, freight, lorry, unspecified {RER}| market for transport, freight, lorry, unspecified | APOS, U	T. Sabbia_ Transport, freight, lorry, unspecified {RER}| market for transport, freight, lorry, unspecified | APOS, U	A4_ Transport, freight, lorry, unspecified {RER}| market for transport, freight, lorry, unspecified | APOS, U	A5 - Tap water {Europe without Switzerland}| market for | APOS, U	Electricity, medium voltage {IT}| market for | APOS, U	A5 - Electricity grid mix, AC, consumption mix, at consumer, 230V IT S	Totale	0	0
	Non renewable, fossil	MJ	1.58397	0.0420042	0.000401129	0.0001531	0.0827064	0.0566579	1.41645	0.18886	0.0012122	0.174648	0.590263	4.13732	4.34215	PE-Nr			Non renewable, fossil	MJ	1.58397	0.0420042	0.000401129	0.0001531	0.0827064	0.0566579	1.41645	1.8886	0.0012122	0.174648	0.590263	5.83706	6.07749	PE-Nr
	Non-renewable, nuclear	MJ	0.0618382	0.0180373	3.37083e-05	1.62609e-05	0.00888776	0.00118525	0.0296313	0.00395084	0.000618312	0.0268626	0.0536274	0.204689					Non-renewable, nuclear	MJ	0.0618382	0.0180373	3.37083e-05	1.62609e-05	0.00888776	0.00118525	0.0296313	0.0395084	0.000618312	0.0268626	0.0536274	0.240247
	Non-renewable, biomass	MJ	2.59786e-05	0	1.30025e-07	5.79669e-08	3.94544e-05	1.46786e-06	3.66965e-05	4.89287e-06	9.16231e-08	2.72832e-05	0	0.000136053					Non-renewable, biomass	MJ	2.59786e-05	0	1.30025e-07	5.79669e-08	3.94544e-05	1.46786e-06	3.66965e-05	4.89287e-05	9.16231e-08	2.72832e-05	0	0.000180089
	Renewable, biomass	MJ	0.0307156	2.21709e-07	9.54816e-06	5.15515e-06	0.216821	0.000281919	0.00704799	0.000939731	6.56601e-05	0.0106926	0	0.266579	0.467341	PE-Re			Renewable, biomass	MJ	0.0307156	2.21709e-07	9.54816e-06	5.15515e-06	0.216821	0.000281919	0.00704799	0.00939731	6.56601e-05	0.0106926	0	0.275037	0.4923	PE-Re
	Renewable, wind, solar, geothe	MJ	0.00939979	8.8283e-05	3.75769e-06	1.3538e-06	0.000936089	0.00011831	0.00295775	0.000394366	6.27699e-05	0.0119045	0.0200632	0.0459302					Renewable, wind, solar, geothe	MJ	0.00939979	8.8283e-05	3.75769e-06	1.3538e-06	0.000936089	0.00011831	0.00295775	0.00394366	6.27699e-05	0.0119045	0.0200632	0.0494795
	Renewable, water	MJ	0.0514778	0.00221042	2.56538e-05	1.02732e-05	0.00302298	0.00043175	0.0107937	0.00143917	0.000117592	0.023599	0.0617028	0.154831					Renewable, water	MJ	0.0514778	0.00221042	2.56538e-05	1.02732e-05	0.00302298	0.00043175	0.0107937	0.0143917	0.000117592	0.023599	0.0617028	0.167784
[truncated: 2 more columns]

## Sheet: RIF1
	Calculation:	Analizza														Calculation:	Analizza
	Results:	Valutazione dell'impatto							Scenario SB-1A							Results:	Valutazione dell'impatto							Scenario SB-1A
	Product:	1 l 0. RIF - Mortar {Europe without Switzerland}| production | APOS, U - A1-A5 (del progetto						Trasporto	RIF							Product:	1 l 0. RIF - Mortar {Europe without Switzerland}| production | APOS, U - A1-A5 (del progetto						Trasporto	RIF
	Metodo:	EN 15804 +A2 Method V1.00 / EF 3.0 normalization and weighting set						Cemento	60							Metodo:	EN 15804 +A2 Method V1.00 / EF 3.0 normalization and weighting set						Cemento	60
	Indicatore:	Caratterizzazione						Sabbia	0							Indicatore:	Caratterizzazione						Sabbia	0
	Skip categories:	Mai							-							Skip categories:	Mai							-
	Esclude processi di infrastrutture:	No							-							Esclude processi di infrastrutture:	No							-
	Esclude le emissioni di lungo termine:	No						Fabbrica-cantiere	50							Esclude le emissioni di lungo termine:	No						Fabbrica-cantiere	500
	Sorted on item:	Categoria d'impatto							-							Sorted on item:	Categoria d'impatto							-
	Sort order:	Ascendente														Sort order:	Ascendente
	0. RIF - Mortar {Europe without Switzerland}| production | APOS, U - A1-A5		A1		A2		A3				A4	A5		TOT		0. RIF - Mortar {Europe without Switzerland}| production | APOS, U - A1-A5		A1		A2		A3				A4	A5		TOT
	Categoria d'impatto	Unità	Cement, limestone 6-20% {RoW}| cement production, limestone 6-20% | Cut-off, U	Sand 0/2 mm, wet and dry quarry, production mix, at plant, undried RER S -	T. Cemento_ Transport, freight, lorry, unspecified {RER}| market for transport, freight, lorry, unspecified | APOS, U	T. Sabbia_ Transport, freight, lorry, unspecified {RER}| market for transport, freight, lorry, unspecified | APOS, U	Conveyor belt {GLO}| market for | APOS, U	Industrial machine, heavy, unspecified {RoW}| market for industrial machine, heavy, unspecified | APOS, U	Packing, cement {RoW}| processing | APOS, U	Electricity, medium voltage {IT}| market for | APOS, U	A4_ Transport, freight, lorry, unspecified {RER}| market for transport, freight, lorry, unspecified | APOS, U	A5 - Tap water {Europe without Switzerland}| market for | APOS, U	A5 - Electricity grid mix, AC, consumption mix, at consumer, 230V IT S	Totale		Categoria d'impatto	Unità	Cement, limestone 6-20% {RoW}| cement production, limestone 6-20% | Cut-off, U	Sand 0/2 mm, wet and dry quarry, production mix, at plant, undried RER S -	T. Cemento_ Transport, freight, lorry, unspecified {RER}| market for transport, freight, lorry, unspecified | APOS, U	T. Sabbia_ Transport, freight, lorry, unspecified {RER}| market for transport, freight, lorry, unspecified | APOS, U	Conveyor belt {GLO}| market for | APOS, U	Industrial machine, heavy, unspecified {RoW}| market for industrial machine, heavy, unspecified | APOS, U	Packing, cement {RoW}| processing | APOS, U	Electricity, medium voltage {IT}| market for | APOS, U	A4_ Transport, freight, lorry, unspecified {RER}| market for transport, freight, lorry, unspecified | APOS, U	A5 - Tap water {Europe without Switzerland}| market for | APOS, U	A5 - Electricity grid mix, AC, consumption mix, at consumer, 230V IT S	Totale
	Climate change	kg CO2 eq	0.333981	0.00333406	0.00357402	0	4.25953e-05	1.60247e-05	0.0101208	0.0137938	0.0119134	0.000101031	0.0427702	0.419647		Climate change	kg CO2 eq	0.333981	0.00333406	0.00357402	0	4.25953e-05	1.60247e-05	0.0101208	0.0137938	0.119134	0.000101031	0.0427702	0.526868
	Ozone depletion	kg CFC11 eq	1.13597e-08	3.96353e-10	8.20615e-10	0	2.40923e-12	1.03759e-12	5.34012e-10	1.91019e-09	2.73538e-09	9.05527e-12	3.75595e-10	1.81444e-08		Ozone depletion	kg CFC11 eq	1.13597e-08	3.96353e-10	8.20615e-10	0	2.40923e-12	1.03759e-12	5.34012e-10	1.91019e-09	2.73538e-08	9.05527e-12	3.75595e-10	4.27628e-08
	Ionising radiation	kBq U-235 eq	0.00698221	0.000626499	0.000284624	0	2.43097e-06	1.09926e-06	0.000613941	0.0015694	0.000948747	3.38063e-05	0.00169879	0.0127615		Ionising radiation	kBq U-235 eq	0.00698221	0.000626499	0.000284624	0	2.43097e-06	1.09926e-06	0.000613941	0.0015694	0.00948747	3.38063e-05	0.00169879	0.0213003
	Photochemical ozone formation	kg NMVOC eq	0.000797007	2.35428e-05	2.27668e-05	0	1.60315e-07	7.20811e-08	3.8188e-05	2.92679e-05	7.58893e-05	3.12745e-07	5.92739e-05	0.00104648		Photochemical ozone formation	kg NMVOC eq	0.000797007	2.35428e-05	2.27668e-05	0	1.60315e-07	7.20811e-08	3.8188e-05	2.92679e-05	0.000758893	3.12745e-07	5.92739e-05	0.00172948
	Particulate matter	disease inc.	6.91278e-09	3.57624e-10	3.23241e-10	0	3.39854e-12	1.42359e-12	2.47316e-09	2.44889e-10	1.07747e-09	5.17146e-12	8.61566e-10	1.22607e-08		Particulate matter	disease inc.	6.91278e-09	3.57624e-10	3.23241e-10	0	3.39854e-12	1.42359e-12	2.47316e-09	2.44889e-10	1.07747e-08	5.17146e-12	8.61566e-10	2.1958e-08
	Human toxicity, non-cancer	CTUh	2.55769e-09	1.22523e-11	5.22336e-11	0	3.37519e-12	1.94015e-12	2.07622e-10	7.86455e-11	1.74112e-10	5.85426e-12	6.37921e-11	3.15752e-09		Human toxicity, non-cancer	CTUh	2.55769e-09	1.22523e-11	5.22336e-11	0	3.37519e-12	1.94015e-12	2.07622e-10	7.86455e-11	1.74112e-09	5.85426e-12	6.37921e-11	4.72453e-09
	Human toxicity, cancer	CTUh	6.65378e-11	2.13253e-13	1.42809e-12	0	2.5824e-13	1.0341e-13	1.94695e-11	2.78301e-12	4.76028e-12	2.30874e-13	3.71755e-12	9.9502e-11		Human toxicity, cancer	CTUh	6.65378e-11	2.13253e-13	1.42809e-12	0	2.5824e-13	1.0341e-13	1.94695e-11	2.78301e-12	4.76028e-11	2.30874e-13	3.71755e-12	1.42345e-10
	Acidification	mol H+ eq	0.000993823	3.20036e-05	2.02544e-05	0	1.87976e-07	1.26133e-07	3.88234e-05	6.39752e-05	6.75148e-05	5.57177e-07	0.000107222	0.00132449		Acidification	mol H+ eq	0.000993823	3.20036e-05	2.02544e-05	0	1.87976e-07	1.26133e-07	3.88234e-05	6.39752e-05	0.000675148	5.57177e-07	0.000107222	0.00193212
	Eutrophication, freshwater	kg P eq	4.20676e-05	7.46529e-10	2.6806e-07	0	2.32083e-08	1.44762e-08	2.36462e-06	3.56998e-06	8.93532e-07	7.06142e-08	2.02095e-09	4.92748e-05		Eutrophication, freshwater	kg P eq	4.20676e-05	7.46529e-10	2.6806e-07	0	2.32083e-08	1.44762e-08	2.36462e-06	3.56998e-06	8.93532e-06	7.06142e-08	2.02095e-09	5.73166e-05
	Eutrophication, marine	kg N eq	0.000283873	8.00089e-06	7.30762e-06	0	4.25411e-08	1.96117e-08	1.7325e-05	1.00239e-05	2.43587e-05	1.08177e-07	1.90314e-05	0.000370091		Eutrophication, marine	kg N eq	0.000283873	8.00089e-06	7.30762e-06	0	4.25411e-08	1.96117e-08	1.7325e-05	1.00239e-05	0.000243587	1.08177e-07	1.90314e-05	0.00058932
	Eutrophication, terrestrial	mol N eq	0.00321064	8.75376e-05	7.98747e-05	0	4.16343e-07	2.05008e-07	0.00011213	0.000110331	0.000266249	1.01406e-06	0.000209191	0.00407759		Eutrophication, terrestrial	mol N eq	0.00321064	8.75376e-05	7.98747e-05	0	4.16343e-07	2.05008e-07	0.00011213	0.000110331	0.00266249	1.01406e-06	0.000209191	0.00647383
	Ecotoxicity, freshwater	CTUe	4.60969	0.0128769	0.0443323	0	0.00145446	0.00105349	2.80096	0.2143	0.147774	0.00191437	0.168116	8.00247		Ecotoxicity, freshwater	CTUe	4.60969	0.0128769	0.0443323	0	0.00145446	0.00105349	2.80096	0.2143	1.47774	0.00191437	0.168116	9.33244
	Land use	Pt	1.02996	0	0.0628542	0	0.00112114	0.000676069	1.5399	0.340344	0.209514	0.00158429	0.0032731	3.18922		Land use	Pt	1.02996	0	0.0628542	0	0.00112114	0.000676069	1.5399	0.340344	2.09514	0.00158429	0.0032731	5.07485
	Water use	m3 depriv.	0.0155889	0.000242583	0.000180976	0	1.86864e-05	7.06333e-06	0.00683902	0.0100199	0.000603252	0.0120691	0.0286051	0.0741745		Water use	m3 depriv.	0.0155889	0.000242583	0.000180976	0	1.86864e-05	7.06333e-06	0.00683902	0.0100199	0.00603252	0.0120691	0.0286051	0.0796038
	Resource use, fossils	MJ	1.55101	0.0570464	0.0544854	0	0.000408843	0.000159496	0.0859621	0.187158	0.181618	0.00162161	0.595339	2.71481		Resource use, fossils	MJ	1.55101	0.0570464	0.0544854	0	0.000408843	0.000159496	0.0859621	0.187158	1.81618	0.00162161	0.595339	4.34937
	Resource use, minerals and metals	kg Sb eq	2.31856e-05	9.86731e-11	8.37666e-08	0	1.5435e-09	8.13928e-10	9.75947e-08	3.94865e-08	2.79222e-07	2.881e-09	3.73648e-09	2.36948e-05		Resource use, minerals and metals	kg Sb eq	2.31856e-05	9.86731e-11	8.37666e-08	0	1.5435e-09	8.13928e-10	9.75947e-08	3.94865e-08	2.79222e-06	2.881e-09	3.73648e-09	2.62078e-05
	Climate change - Fossil	kg CO2 eq	0.330701	0.00337243	0.00357078	0	4.24758e-05	1.59886e-05	0.00556468	0.0125335	0.0119026	9.85918e-05	0.0428314	0.410634		Climate change - Fossil	kg CO2 eq	0.330701	0.00337243	0.00357078	0	4.24758e-05	1.59886e-05	0.00556468	0.0125335	0.119026	9.85918e-05	0.0428314	0.517757
	Climate change - Biogenic	kg CO2 eq	0.00317501	-3.8366e-05	1.83661e-06	0	1.25274e-08	-7.11704e-09	0.00452275	0.00124799	6.12204e-06	2.25578e-06	-6.12064e-05	0.00885639		Climate change - Biogenic	kg CO2 eq	0.00317501	-3.8366e-05	1.83661e-06	0	1.25274e-08	-7.11704e-09	0.00452275	0.00124799	6.12204e-05	2.25578e-06	-6.12064e-05	0.00891149
	Climate change - Land use and LU change	kg CO2 eq	0.000105076	0	1.39574e-06	0	1.07024e-07	4.31495e-08	3.34016e-05	1.22948e-05	4.65248e-06	1.83538e-07	0	0.000157154		Climate change - Land use and LU change	kg CO2 eq	0.000105076	0	1.39574e-06	0	1.07024e-07	4.31495e-08	3.34016e-05	1.22948e-05	4.65248e-05	1.83538e-07	0	0.000199027
	Human toxicity, non-cancer - organics	CTUh	3.75683e-11	1.24483e-13	5.90864e-12	0	5.95903e-14	5.63053e-14	2.06811e-11	2.65288e-12	1.96955e-11	2.95315e-14	3.42499e-13	8.71188e-11		Human toxicity, non-cancer - organics	CTUh	3.75683e-11	1.24483e-13	5.90864e-12	0	5.95903e-14	5.63053e-14	2.06811e-11	2.65288e-12	1.96955e-10	2.95315e-14	3.42499e-13	2.64378e-10
	Human toxicity, non-cancer - inorganics	CTUh	3.84349e-10	4.08815e-12	1.00641e-11	0	4.65776e-13	1.78073e-13	6.33743e-11	1.13768e-11	3.35469e-11	5.27865e-13	2.16605e-11	5.29631e-10		Human toxicity, non-cancer - inorganics	CTUh	3.84349e-10	4.08815e-12	1.00641e-11	0	4.65776e-13	1.78073e-13	6.33743e-11	1.13768e-11	3.35469e-10	5.27865e-13	2.16605e-11	8.31554e-10
	Human toxicity, non-cancer - metals	CTUh	2.14731e-09	8.0397e-12	3.63706e-11	0	2.85397e-12	1.70737e-12	1.24214e-10	6.60075e-11	1.21235e-10	5.30519e-12	4.1789e-11	2.55483e-09		Human toxicity, non-cancer - metals	CTUh	2.14731e-09	8.0397e-12	3.63706e-11	0	2.85397e-12	1.70737e-12	1.24214e-10	6.60075e-11	1.21235e-09	5.30519e-12	4.1789e-11	3.64595e-09
	Human toxicity, cancer - organics	CTUh	3.3895e-11	1.04426e-13	8.40716e-13	0	6.84336e-14	2.63517e-14	1.64289e-11	1.09191e-12	2.80239e-12	7.80713e-14	2.09663e-12	5.74328e-11		Human toxicity, cancer - organics	CTUh	3.3895e-11	1.04426e-13	8.40716e-13	0	6.84336e-14	2.63517e-14	1.64289e-11	1.09191e-12	2.80239e-11	7.80713e-14	2.09663e-12	8.26543e-11
	Human toxicity, cancer - inorganics	CTUh	0	0	7.28961e-21	0	2.18973e-22	8.35363e-23	5.36536e-20	2.52748e-20	2.42987e-20	4.37779e-22	0	1.11257e-19		Human toxicity, cancer - inorganics	CTUh	0	0	7.28961e-21	0	2.18973e-22	8.35363e-23	5.36536e-20	2.52748e-20	2.42987e-19	4.37779e-22	0	3.29945e-19
	Human toxicity, cancer - metals	CTUh	3.26428e-11	1.08827e-13	5.87369e-13	0	1.89807e-13	7.70585e-14	3.04065e-12	1.6911e-12	1.9579e-12	1.52803e-13	1.62092e-12	4.20692e-11		Human toxicity, cancer - metals	CTUh	3.26428e-11	1.08827e-13	5.87369e-13	0	1.89807e-13	7.70585e-14	3.04065e-12	1.6911e-12	1.9579e-11	1.52803e-13	1.62092e-12	5.96903e-11
	Ecotoxicity, freshwater - organics	CTUe	0.0413495	9.88623e-05	0.00325729	0	1.46986e-05	8.96591e-06	0.00859909	0.0022292	0.0108576	3.29099e-05	0.000426527	0.0668747		Ecotoxicity, freshwater - organics	CTUe	0.0413495	9.88623e-05	0.00325729	0	1.46986e-05	8.96591e-06	0.00859909	0.0022292	0.108576	3.29099e-05	0.000426527	0.164593
	Ecotoxicity, freshwater - inorganics	CTUe	0.267384	0.00361191	0.0114607	0	0.00011231	8.2116e-05	0.0200225	0.0130356	0.0382023	0.000170706	0.13538	0.489462		Ecotoxicity, freshwater - inorganics	CTUe	0.267384	0.00361191	0.0114607	0	0.00011231	8.2116e-05	0.0200225	0.0130356	0.382023	0.000170706	0.13538	0.833283
	Ecotoxicity, freshwater - metals	CTUe	4.30095	0.00916618	0.0296143	0	0.00132745	0.000962412	2.77234	0.199035	0.0987143	0.00171075	0.0323089	7.44614		Ecotoxicity, freshwater - metals	CTUe	4.30095	0.00916618	0.0296143	0	0.00132745	0.000962412	2.77234	0.199035	0.987143	0.00171075	0.0323089	8.33456
	Calculation:	Analizza														Calculation:	Analizza								Scenario SB-1A
	Results:	Valutazione dell'impatto							Scenario SB-1A							Results:	Valutazione dell'impatto							Trasporto	RIF
	Product:	1 l 0. RIF - Mortar {Europe without Switzerland}| production | APOS, U - A1-A5 (del progetto						Trasporto	RIF							Product:	1 l 0. RIF - Mortar {Europe without Switzerland}| production | APOS, U - A1-A5 (del progetto							Cemento	60
	Metodo:	EN 15804 +A2 Method V1.00 / EF 3.0 normalization and weighting set						Cemento	60							Metodo:	EN 15804 +A2 Method V1.00 / EF 3.0 normalization and weighting set							Sabbia	100
	Indicatore:	Caratterizzazione						Sabbia	100							Indicatore:	Caratterizzazione								-
	Skip categories:	Mai							-							Skip categories:	Mai								-
	Esclude processi di infrastrutture:	No							-							Esclude processi di infrastrutture:	No							Fabbrica-cantiere	500
	Esclude le emissioni di lungo termine:	No						Fabbrica-cantiere	50							Esclude le emissioni di lungo termine:	No								-
	Sorted on item:	Categoria d'impatto							-							Sorted on item:	Categoria d'impatto
	Sort order:	Ascendente														Sort order:	Ascendente
	0. RIF - Mortar {Europe without Switzerland}| production | APOS, U - A1-A5		A1		A2		A3				A4	A5		TOT		0. RIF - Mortar {Europe without Switzerland}| production | APOS, U - A1-A5		A1		A2		A3				A4	A5		TOT
	Categoria d'impatto	Unità	Cement, limestone 6-20% {RoW}| cement production, limestone 6-20% | Cut-off, U	Sand 0/2 mm, wet and dry quarry, production mix, at plant, undried RER S -	T. Cemento_ Transport, freight, lorry, unspecified {RER}| market for transport, freight, lorry, unspecified | APOS, U	T. Sabbia_ Transport, freight, lorry, unspecified {RER}| market for transport, freight, lorry, unspecified | APOS, U	Conveyor belt {GLO}| market for | APOS, U	Industrial machine, heavy, unspecified {RoW}| market for industrial machine, heavy, unspecified | APOS, U	Packing, cement {RoW}| processing | APOS, U	Electricity, medium voltage {IT}| market for | APOS, U	A4_ Transport, freight, lorry, unspecified {RER}| market for transport, freight, lorry, unspecified | APOS, U	A5 - Tap water {Europe without Switzerland}| market for | APOS, U	A5 - Electricity grid mix, AC, consumption mix, at consumer, 230V IT S	Totale		Categoria d'impatto	Unità	Cement, limestone 6-20% {RoW}| cement production, limestone 6-20% | Cut-off, U	Sand 0/2 mm, wet and dry quarry, production mix, at plant, undried RER S -	T. Cemento_ Transport, freight, lorry, unspecified {RER}| market for transport, freight, lorry, unspecified | APOS, U	T. Sabbia_ Transport, freight, lorry, unspecified {RER}| market for transport, freight, lorry, unspecified | APOS, U	Conveyor belt {GLO}| market for | APOS, U	Industrial machine, heavy, unspecified {RoW}| market for industrial machine, heavy, unspecified | APOS, U	Packing, cement {RoW}| processing | APOS, U	Electricity, medium voltage {IT}| market for | APOS, U	A4_ Transport, freight, lorry, unspecified {RER}| market for transport, freight, lorry, unspecified | APOS, U	A5 - Tap water {Europe without Switzerland}| market for | APOS, U	A5 - Electricity grid mix, AC, consumption mix, at consumer, 230V IT S	Totale
	Climate change	kg CO2 eq	0.333981	0.00333406	0.00357402	0.0178701	4.25953e-05	1.60247e-05	0.0101208	0.0137938	0.0119134	0.000101031	0.0427702	0.437517		Climate change	kg CO2 eq	0.333981	0.00333406	0.00357402	0.0178701	4.25953e-05	1.60247e-05	0.0101208	0.0137938	0.119134	0.000101031	0.0427702	0.544738
	Ozone depletion	kg CFC11 eq	1.13597e-08	3.96353e-10	8.20615e-10	4.10308e-09	2.40923e-12	1.03759e-12	5.34012e-10	1.91019e-09	2.73538e-09	9.05527e-12	3.75595e-10	2.22475e-08		Ozone depletion	kg CFC11 eq	1.13597e-08	3.96353e-10	8.20615e-10	4.10308e-09	2.40923e-12	1.03759e-12	5.34012e-10	1.91019e-09	2.73538e-08	9.05527e-12	3.75595e-10	4.68659e-08
	Ionising radiation	kBq U-235 eq	0.00698221	0.000626499	0.000284624	0.00142312	2.43097e-06	1.09926e-06	0.000613941	0.0015694	0.000948747	3.38063e-05	0.00169879	0.0141847		Ionising radiation	kBq U-235 eq	0.00698221	0.000626499	0.000284624	0.00142312	2.43097e-06	1.09926e-06	0.000613941	0.0015694	0.00948747	3.38063e-05	0.00169879	0.0227234
	Photochemical ozone formation	kg NMVOC eq	0.000797007	2.35428e-05	2.27668e-05	0.000113834	1.60315e-07	7.20811e-08	3.8188e-05	2.92679e-05	7.58893e-05	3.12745e-07	5.92739e-05	0.00116031		Photochemical ozone formation	kg NMVOC eq	0.000797007	2.35428e-05	2.27668e-05	0.000113834	1.60315e-07	7.20811e-08	3.8188e-05	2.92679e-05	0.000758893	3.12745e-07	5.92739e-05	0.00184332
	Particulate matter	disease inc.	6.91278e-09	3.57624e-10	3.23241e-10	1.61621e-09	3.39854e-12	1.42359e-12	2.47316e-09	2.44889e-10	1.07747e-09	5.17146e-12	8.61566e-10	1.38769e-08		Particulate matter	disease inc.	6.91278e-09	3.57624e-10	3.23241e-10	1.61621e-09	3.39854e-12	1.42359e-12	2.47316e-09	2.44889e-10	1.07747e-08	5.17146e-12	8.61566e-10	2.35742e-08
	Human toxicity, non-cancer	CTUh	2.55769e-09	1.22523e-11	5.22336e-11	2.61168e-10	3.37519e-12	1.94015e-12	2.07622e-10	7.86455e-11	1.74112e-10	5.85426e-12	6.37921e-11	3.41869e-09		Human toxicity, non-cancer	CTUh	2.55769e-09	1.22523e-11	5.22336e-11	2.61168e-10	3.37519e-12	1.94015e-12	2.07622e-10	7.86455e-11	1.74112e-09	5.85426e-12	6.37921e-11	4.98569e-09
	Human toxicity, cancer	CTUh	6.65378e-11	2.13253e-13	1.42809e-12	7.14043e-12	2.5824e-13	1.0341e-13	1.94695e-11	2.78301e-12	4.76028e-12	2.30874e-13	3.71755e-12	1.06642e-10		Human toxicity, cancer	CTUh	6.65378e-11	2.13253e-13	1.42809e-12	7.14043e-12	2.5824e-13	1.0341e-13	1.94695e-11	2.78301e-12	4.76028e-11	2.30874e-13	3.71755e-12	1.49485e-10
	Acidification	mol H+ eq	0.000993823	3.20036e-05	2.02544e-05	0.000101272	1.87976e-07	1.26133e-07	3.88234e-05	6.39752e-05	6.75148e-05	5.57177e-07	0.000107222	0.00142576		Acidification	mol H+ eq	0.000993823	3.20036e-05	2.02544e-05	0.000101272	1.87976e-07	1.26133e-07	3.88234e-05	6.39752e-05	0.000675148	5.57177e-07	0.000107222	0.00203339
	Eutrophication, freshwater	kg P eq	4.20676e-05	7.46529e-10	2.6806e-07	1.3403e-06	2.32083e-08	1.44762e-08	2.36462e-06	3.56998e-06	8.93532e-07	7.06142e-08	2.02095e-09	5.06151e-05		Eutrophication, freshwater	kg P eq	4.20676e-05	7.46529e-10	2.6806e-07	1.3403e-06	2.32083e-08	1.44762e-08	2.36462e-06	3.56998e-06	8.93532e-06	7.06142e-08	2.02095e-09	5.86569e-05
	Eutrophication, marine	kg N eq	0.000283873	8.00089e-06	7.30762e-06	3.65381e-05	4.25411e-08	1.96117e-08	1.7325e-05	1.00239e-05	2.43587e-05	1.08177e-07	1.90314e-05	0.000406629		Eutrophication, marine	kg N eq	0.000283873	8.00089e-06	7.30762e-06	3.65381e-05	4.25411e-08	1.96117e-08	1.7325e-05	1.00239e-05	0.000243587	1.08177e-07	1.90314e-05	0.000625858
	Eutrophication, terrestrial	mol N eq	0.00321064	8.75376e-05	7.98747e-05	0.000399373	4.16343e-07	2.05008e-07	0.00011213	0.000110331	0.000266249	1.01406e-06	0.000209191	0.00447696		Eutrophication, terrestrial	mol N eq	0.00321064	8.75376e-05	7.98747e-05	0.000399373	4.16343e-07	2.05008e-07	0.00011213	0.000110331	0.00266249	1.01406e-06	0.000209191	0.0068732
	Ecotoxicity, freshwater	CTUe	4.60969	0.0128769	0.0443323	0.221661	0.00145446	0.00105349	2.80096	0.2143	0.147774	0.00191437	0.168116	8.22413		Ecotoxicity, freshwater	CTUe	4.60969	0.0128769	0.0443323	0.221661	0.00145446	0.00105349	2.80096	0.2143	1.47774	0.00191437	0.168116	9.5541
	Land use	Pt	1.02996	0	0.0628542	0.314271	0.00112114	0.000676069	1.5399	0.340344	0.209514	0.00158429	0.0032731	3.5035		Land use	Pt	1.02996	0	0.0628542	0.314271	0.00112114	0.000676069	1.5399	0.340344	2.09514	0.00158429	0.0032731	5.38912
	Water use	m3 depriv.	0.0155889	0.000242583	0.000180976	0.000904878	1.86864e-05	7.06333e-06	0.00683902	0.0100199	0.000603252	0.0120691	0.0286051	0.0750794		Water use	m3 depriv.	0.0155889	0.000242583	0.000180976	0.000904878	1.86864e-05	7.06333e-06	0.00683902	0.0100199	0.00603252	0.0120691	0.0286051	0.0805087
	Resource use, fossils	MJ	1.55101	0.0570464	0.0544854	0.272427	0.000408843	0.000159496	0.0859621	0.187158	0.181618	0.00162161	0.595339	2.98724		Resource use, fossils	MJ	1.55101	0.0570464	0.0544854	0.272427	0.000408843	0.000159496	0.0859621	0.187158	1.81618	0.00162161	0.595339	4.6218
	Resource use, minerals and metals	kg Sb eq	2.31856e-05	9.86731e-11	8.37666e-08	4.18833e-07	1.5435e-09	8.13928e-10	9.75947e-08	3.94865e-08	2.79222e-07	2.881e-09	3.73648e-09	2.41136e-05		Resource use, minerals and metals	kg Sb eq	2.31856e-05	9.86731e-11	8.37666e-08	4.18833e-07	1.5435e-09	8.13928e-10	9.75947e-08	3.94865e-08	2.79222e-06	2.881e-09	3.73648e-09	2.66266e-05
	Climate change - Fossil	kg CO2 eq	0.330701	0.00337243	0.00357078	0.0178539	4.24758e-05	1.59886e-05	0.00556468	0.0125335	0.0119026	9.85918e-05	0.0428314	0.428488		Climate change - Fossil	kg CO2 eq	0.330701	0.00337243	0.00357078	0.0178539	4.24758e-05	1.59886e-05	0.00556468	0.0125335	0.119026	9.85918e-05	0.0428314	0.535611
	Climate change - Biogenic	kg CO2 eq	0.00317501	-3.8366e-05	1.83661e-06	9.18306e-06	1.25274e-08	-7.11704e-09	0.00452275	0.00124799	6.12204e-06	2.25578e-06	-6.12064e-05	0.00886558		Climate change - Biogenic	kg CO2 eq	0.00317501	-3.8366e-05	1.83661e-06	9.18306e-06	1.25274e-08	-7.11704e-09	0.00452275	0.00124799	6.12204e-05	2.25578e-06	-6.12064e-05	0.00892068
	Climate change - Land use and LU change	kg CO2 eq	0.000105076	0	1.39574e-06	6.97872e-06	1.07024e-07	4.31495e-08	3.34016e-05	1.22948e-05	4.65248e-06	1.83538e-07	0	0.000164133		Climate change - Land use and LU change	kg CO2 eq	0.000105076	0	1.39574e-06	6.97872e-06	1.07024e-07	4.31495e-08	3.34016e-05	1.22948e-05	4.65248e-05	1.83538e-07	0	0.000206005
	Human toxicity, non-cancer - organics	CTUh	3.75683e-11	1.24483e-13	5.90864e-12	2.95432e-11	5.95903e-14	5.63053e-14	2.06811e-11	2.65288e-12	1.96955e-11	2.95315e-14	3.42499e-13	1.16662e-10		Human toxicity, non-cancer - organics	CTUh	3.75683e-11	1.24483e-13	5.90864e-12	2.95432e-11	5.95903e-14	5.63053e-14	2.06811e-11	2.65288e-12	1.96955e-10	2.95315e-14	3.42499e-13	2.93921e-10
	Human toxicity, non-cancer - inorganics	CTUh	3.84349e-10	4.08815e-12	1.00641e-11	5.03203e-11	4.65776e-13	1.78073e-13	6.33743e-11	1.13768e-11	3.35469e-11	5.27865e-13	2.16605e-11	5.79952e-10		Human toxicity, non-cancer - inorganics	CTUh	3.84349e-10	4.08815e-12	1.00641e-11	5.03203e-11	4.65776e-13	1.78073e-13	6.33743e-11	1.13768e-11	3.35469e-10	5.27865e-13	2.16605e-11	8.81874e-10
	Human toxicity, non-cancer - metals	CTUh	2.14731e-09	8.0397e-12	3.63706e-11	1.81853e-10	2.85397e-12	1.70737e-12	1.24214e-10	6.60075e-11	1.21235e-10	5.30519e-12	4.1789e-11	2.73668e-09		Human toxicity, non-cancer - metals	CTUh	2.14731e-09	8.0397e-12	3.63706e-11	1.81853e-10	2.85397e-12	1.70737e-12	1.24214e-10	6.60075e-11	1.21235e-09	5.30519e-12	4.1789e-11	3.8278e-09
	Human toxicity, cancer - organics	CTUh	3.3895e-11	1.04426e-13	8.40716e-13	4.20358e-12	6.84336e-14	2.63517e-14	1.64289e-11	1.09191e-12	2.80239e-12	7.80713e-14	2.09663e-12	6.16363e-11		Human toxicity, cancer - organics	CTUh	3.3895e-11	1.04426e-13	8.40716e-13	4.20358e-12	6.84336e-14	2.63517e-14	1.64289e-11	1.09191e-12	2.80239e-11	7.80713e-14	2.09663e-12	8.68578e-11
	Human toxicity, cancer - inorganics	CTUh	0	0	7.28961e-21	3.6448e-20	2.18973e-22	8.35363e-23	5.36536e-20	2.52748e-20	2.42987e-20	4.37779e-22	0	1.47705e-19		Human toxicity, cancer - inorganics	CTUh	0	0	7.28961e-21	3.6448e-20	2.18973e-22	8.35363e-23	5.36536e-20	2.52748e-20	2.42987e-19	4.37779e-22	0	3.66393e-19
	Human toxicity, cancer - metals	CTUh	3.26428e-11	1.08827e-13	5.87369e-13	2.93684e-12	1.89807e-13	7.70585e-14	3.04065e-12	1.6911e-12	1.9579e-12	1.52803e-13	1.62092e-12	4.50061e-11		Human toxicity, cancer - metals	CTUh	3.26428e-11	1.08827e-13	5.87369e-13	2.93684e-12	1.89807e-13	7.70585e-14	3.04065e-12	1.6911e-12	1.9579e-11	1.52803e-13	1.62092e-12	6.26271e-11
	Ecotoxicity, freshwater - organics	CTUe	0.0413495	9.88623e-05	0.00325729	0.0162864	1.46986e-05	8.96591e-06	0.00859909	0.0022292	0.0108576	3.29099e-05	0.000426527	0.0831611		Ecotoxicity, freshwater - organics	CTUe	0.0413495	9.88623e-05	0.00325729	0.0162864	1.46986e-05	8.96591e-06	0.00859909	0.0022292	0.108576	3.29099e-05	0.000426527	0.18088
	Ecotoxicity, freshwater - inorganics	CTUe	0.267384	0.00361191	0.0114607	0.0573035	0.00011231	8.2116e-05	0.0200225	0.0130356	0.0382023	0.000170706	0.13538	0.546766		Ecotoxicity, freshwater - inorganics	CTUe	0.267384	0.00361191	0.0114607	0.0573035	0.00011231	8.2116e-05	0.0200225	0.0130356	0.382023	0.000170706	0.13538	0.890587
	Ecotoxicity, freshwater - metals	CTUe	4.30095	0.00916618	0.0296143	0.148071	0.00132745	0.000962412	2.77234	0.199035	0.0987143	0.00171075	0.0323089	7.59421		Ecotoxicity, freshwater - metals	CTUe	4.30095	0.00916618	0.0296143	0.148071	0.00132745	0.000962412	2.77234	0.199035	0.987143	0.00171075	0.0323089	8.48264
	Calculation:	Analizza														Calculation:	Analizza
	Results:	Valutazione dell'impatto							Scenario SB-1A							Results:	Valutazione dell'impatto							Scenario SB-1A
	Product:	1 l 0. RIF - Mortar {Europe without Switzerland}| production | APOS, U - A1-A5 (del progetto						Trasporto	RIF							Product:	1 l 0. RIF - Mortar {Europe without Switzerland}| production | APOS, U - A1-A5 (del progetto						Trasporto	RIF
	Metodo:	EN 15804 +A2 Method V1.00 / EF 3.0 normalization and weighting set						Cemento	60							Metodo:	EN 15804 +A2 Method V1.00 / EF 3.0 normalization and weighting set						Cemento	60
	Indicatore:	Caratterizzazione						Sabbia	200							Indicatore:	Caratterizzazione						Sabbia	200
	Skip categories:	Mai							-							Skip categories:	Mai							-
	Esclude processi di infrastrutture:	No							-							Esclude processi di infrastrutture:	No							-
	Esclude le emissioni di lungo termine:	No						Fabbrica-cantiere	50							Esclude le emissioni di lungo termine:	No						Fabbrica-cantiere	500
	Sorted on item:	Categoria d'impatto							-							Sorted on item:	Categoria d'impatto							-
	Sort order:	Ascendente														Sort order:	Ascendente
	0. RIF - Mortar {Europe without Switzerland}| production | APOS, U - A1-A5		A1		A2		A3				A4	A5		TOT		0. RIF - Mortar {Europe without Switzerland}| production | APOS, U - A1-A5		A1		A2		A3				A4	A5		TOT
	Categoria d'impatto	Unità	Cement, limestone 6-20% {RoW}| cement production, limestone 6-20% | Cut-off, U	Sand 0/2 mm, wet and dry quarry, production mix, at plant, undried RER S -	T. Cemento_ Transport, freight, lorry, unspecified {RER}| market for transport, freight, lorry, unspecified | APOS, U	T. Sabbia_ Transport, freight, lorry, unspecified {RER}| market for transport, freight, lorry, unspecified | APOS, U	Conveyor belt {GLO}| market for | APOS, U	Industrial machine, heavy, unspecified {RoW}| market for industrial machine, heavy, unspecified | APOS, U	Packing, cement {RoW}| processing | APOS, U	Electricity, medium voltage {IT}| market for | APOS, U	A4_ Transport, freight, lorry, unspecified {RER}| market for transport, freight, lorry, unspecified | APOS, U	A5 - Tap water {Europe without Switzerland}| market for | APOS, U	A5 - Electricity grid mix, AC, consumption mix, at consumer, 230V IT S	Totale		Categoria d'impatto	Unità	Cement, limestone 6-20% {RoW}| cement production, limestone 6-20% | Cut-off, U	Sand 0/2 mm, wet and dry quarry, production mix, at plant, undried RER S -	T. Cemento_ Transport, freight, lorry, unspecified {RER}| market for transport, freight, lorry, unspecified | APOS, U	T. Sabbia_ Transport, freight, lorry, unspecified {RER}| market for transport, freight, lorry, unspecified | APOS, U	Conveyor belt {GLO}| market for | APOS, U	Industrial machine, heavy, unspecified {RoW}| market for industrial machine, heavy, unspecified | APOS, U	Packing, cement {RoW}| processing | APOS, U	Electricity, medium voltage {IT}| market for | APOS, U	A4_ Transport, freight, lorry, unspecified {RER}| market for transport, freight, lorry, unspecified | APOS, U	A5 - Tap water {Europe without Switzerland}| market for | APOS, U	A5 - Electricity grid mix, AC, consumption mix, at consumer, 230V IT S	Totale
	Climate change	kg CO2 eq	0.333981	0.00333406	0.00357402	0.0357402	4.25953e-05	1.60247e-05	0.0101208	0.0137938	0.0119134	0.000101031	0.0427702	0.455387		Climate change	kg CO2 eq	0.333981	0.00333406	0.00357402	0.0357402	4.25953e-05	1.60247e-05	0.0101208	0.0137938	0.119134	0.000101031	0.0427702	0.562608
	Ozone depletion	kg CFC11 eq	1.13597e-08	3.96353e-10	8.20615e-10	8.20615e-09	2.40923e-12	1.03759e-12	5.34012e-10	1.91019e-09	2.73538e-09	9.05527e-12	3.75595e-10	2.63505e-08		Ozone depletion	kg CFC11 eq	1.13597e-08	3.96353e-10	8.20615e-10	8.20615e-09	2.40923e-12	1.03759e-12	5.34012e-10	1.91019e-09	2.73538e-08	9.05527e-12	3.75595e-10	5.0969e-08
	Ionising radiation	kBq U-235 eq	0.00698221	0.000626499	0.000284624	0.00284624	2.43097e-06	1.09926e-06	0.000613941	0.0015694	0.000948747	3.38063e-05	0.00169879	0.0156078		Ionising radiation	kBq U-235 eq	0.00698221	0.000626499	0.000284624	0.00284624	2.43097e-06	1.09926e-06	0.000613941	0.0015694	0.00948747	3.38063e-05	0.00169879	0.0241465
	Photochemical ozone formation	kg NMVOC eq	0.000797007	2.35428e-05	2.27668e-05	0.000227668	1.60315e-07	7.20811e-08	3.8188e-05	2.92679e-05	7.58893e-05	3.12745e-07	5.92739e-05	0.00127415		Photochemical ozone formation	kg NMVOC eq	0.000797007	2.35428e-05	2.27668e-05	0.000227668	1.60315e-07	7.20811e-08	3.8188e-05	2.92679e-05	0.000758893	3.12745e-07	5.92739e-05	0.00195715
	Particulate matter	disease inc.	6.91278e-09	3.57624e-10	3.23241e-10	3.23241e-09	3.39854e-12	1.42359e-12	2.47316e-09	2.44889e-10	1.07747e-09	5.17146e-12	8.61566e-10	1.54931e-08		Particulate matter	disease inc.	6.91278e-09	3.57624e-10	3.23241e-10	3.23241e-09	3.39854e-12	1.42359e-12	2.47316e-09	2.44889e-10	1.07747e-08	5.17146e-12	8.61566e-10	2.51904e-08
	Human toxicity, non-cancer	CTUh	2.55769e-09	1.22523e-11	5.22336e-11	5.22336e-10	3.37519e-12	1.94015e-12	2.07622e-10	7.86455e-11	1.74112e-10	5.85426e-12	6.37921e-11	3.67985e-09		Human toxicity, non-cancer	CTUh	2.55769e-09	1.22523e-11	5.22336e-11	5.22336e-10	3.37519e-12	1.94015e-12	2.07622e-10	7.86455e-11	1.74112e-09	5.85426e-12	6.37921e-11	5.24686e-09
	Human toxicity, cancer	CTUh	6.65378e-11	2.13253e-13	1.42809e-12	1.42809e-11	2.5824e-13	1.0341e-13	1.94695e-11	2.78301e-12	4.76028e-12	2.30874e-13	3.71755e-12	1.13783e-10		Human toxicity, cancer	CTUh	6.65378e-11	2.13253e-13	1.42809e-12	1.42809e-11	2.5824e-13	1.0341e-13	1.94695e-11	2.78301e-12	4.76028e-11	2.30874e-13	3.71755e-12	1.56625e-10
	Acidification	mol H+ eq	0.000993823	3.20036e-05	2.02544e-05	0.000202544	1.87976e-07	1.26133e-07	3.88234e-05	6.39752e-05	6.75148e-05	5.57177e-07	0.000107222	0.00152703		Acidification	mol H+ eq	0.000993823	3.20036e-05	2.02544e-05	0.000202544	1.87976e-07	1.26133e-07	3.88234e-05	6.39752e-05	0.000675148	5.57177e-07	0.000107222	0.00213467
	Eutrophication, freshwater	kg P eq	4.20676e-05	7.46529e-10	2.6806e-07	2.6806e-06	2.32083e-08	1.44762e-08	2.36462e-06	3.56998e-06	8.93532e-07	7.06142e-08	2.02095e-09	5.19554e-05		Eutrophication, freshwater	kg P eq	4.20676e-05	7.46529e-10	2.6806e-07	2.6806e-06	2.32083e-08	1.44762e-08	2.36462e-06	3.56998e-06	8.93532e-06	7.06142e-08	2.02095e-09	5.99972e-05
	Eutrophication, marine	kg N eq	0.000283873	8.00089e-06	7.30762e-06	7.30762e-05	4.25411e-08	1.96117e-08	1.7325e-05	1.00239e-05	2.43587e-05	1.08177e-07	1.90314e-05	0.000443167		Eutrophication, marine	kg N eq	0.000283873	8.00089e-06	7.30762e-06	7.30762e-05	4.25411e-08	1.96117e-08	1.7325e-05	1.00239e-05	0.000243587	1.08177e-07	1.90314e-05	0.000662396
	Eutrophication, terrestrial	mol N eq	0.00321064	8.75376e-05	7.98747e-05	0.000798747	4.16343e-07	2.05008e-07	0.00011213	0.000110331	0.000266249	1.01406e-06	0.000209191	0.00487634		Eutrophication, terrestrial	mol N eq	0.00321064	8.75376e-05	7.98747e-05	0.000798747	4.16343e-07	2.05008e-07	0.00011213	0.000110331	0.00266249	1.01406e-06	0.000209191	0.00727258
	Ecotoxicity, freshwater	CTUe	4.60969	0.0128769	0.0443323	0.443323	0.00145446	0.00105349	2.80096	0.2143	0.147774	0.00191437	0.168116	8.4458		Ecotoxicity, freshwater	CTUe	4.60969	0.0128769	0.0443323	0.443323	0.00145446	0.00105349	2.80096	0.2143	1.47774	0.00191437	0.168116	9.77576
	Land use	Pt	1.02996	0	0.0628542	0.628542	0.00112114	0.000676069	1.5399	0.340344	0.209514	0.00158429	0.0032731	3.81777		Land use	Pt	1.02996	0	0.0628542	0.628542	0.00112114	0.000676069	1.5399	0.340344	2.09514	0.00158429	0.0032731	5.70339
	Water use	m3 depriv.	0.0155889	0.000242583	0.000180976	0.00180976	1.86864e-05	7.06333e-06	0.00683902	0.0100199	0.000603252	0.0120691	0.0286051	0.0759843		Water use	m3 depriv.	0.0155889	0.000242583	0.000180976	0.00180976	1.86864e-05	7.06333e-06	0.00683902	0.0100199	0.00603252	0.0120691	0.0286051	0.0814136
	Resource use, fossils	MJ	1.55101	0.0570464	0.0544854	0.544854	0.000408843	0.000159496	0.0859621	0.187158	0.181618	0.00162161	0.595339	3.25967		Resource use, fossils	MJ	1.55101	0.0570464	0.0544854	0.544854	0.000408843	0.000159496	0.0859621	0.187158	1.81618	0.00162161	0.595339	4.89423
	Resource use, minerals and metals	kg Sb eq	2.31856e-05	9.86731e-11	8.37666e-08	8.37666e-07	1.5435e-09	8.13928e-10	9.75947e-08	3.94865e-08	2.79222e-07	2.881e-09	3.73648e-09	2.45324e-05		Resource use, minerals and metals	kg Sb eq	2.31856e-05	9.86731e-11	8.37666e-08	8.37666e-07	1.5435e-09	8.13928e-10	9.75947e-08	3.94865e-08	2.79222e-06	2.881e-09	3.73648e-09	2.70454e-05
	Climate change - Fossil	kg CO2 eq	0.330701	0.00337243	0.00357078	0.0357078	4.24758e-05	1.59886e-05	0.00556468	0.0125335	0.0119026	9.85918e-05	0.0428314	0.446342		Climate change - Fossil	kg CO2 eq	0.330701	0.00337243	0.00357078	0.0357078	4.24758e-05	1.59886e-05	0.00556468	0.0125335	0.119026	9.85918e-05	0.0428314	0.553465
	Climate change - Biogenic	kg CO2 eq	0.00317501	-3.8366e-05	1.83661e-06	1.83661e-05	1.25274e-08	-7.11704e-09	0.00452275	0.00124799	6.12204e-06	2.25578e-06	-6.12064e-05	0.00887476		Climate change - Biogenic	kg CO2 eq	0.00317501	-3.8366e-05	1.83661e-06	1.83661e-05	1.25274e-08	-7.11704e-09	0.00452275	0.00124799	6.12204e-05	2.25578e-06	-6.12064e-05	0.00892986
	Climate change - Land use and LU change	kg CO2 eq	0.000105076	0	1.39574e-06	1.39574e-05	1.07024e-07	4.31495e-08	3.34016e-05	1.22948e-05	4.65248e-06	1.83538e-07	0	0.000171112		Climate change - Land use and LU change	kg CO2 eq	0.000105076	0	1.39574e-06	1.39574e-05	1.07024e-07	4.31495e-08	3.34016e-05	1.22948e-05	4.65248e-05	1.83538e-07	0	0.000212984
	Human toxicity, non-cancer - organics	CTUh	3.75683e-11	1.24483e-13	5.90864e-12	5.90864e-11	5.95903e-14	5.63053e-14	2.06811e-11	2.65288e-12	1.96955e-11	2.95315e-14	3.42499e-13	1.46205e-10		Human toxicity, non-cancer - organics	CTUh	3.75683e-11	1.24483e-13	5.90864e-12	5.90864e-11	5.95903e-14	5.63053e-14	2.06811e-11	2.65288e-12	1.96955e-10	2.95315e-14	3.42499e-13	3.23464e-10
	Human toxicity, non-cancer - inorganics	CTUh	3.84349e-10	4.08815e-12	1.00641e-11	1.00641e-10	4.65776e-13	1.78073e-13	6.33743e-11	1.13768e-11	3.35469e-11	5.27865e-13	2.16605e-11	6.30272e-10		Human toxicity, non-cancer - inorganics	CTUh	3.84349e-10	4.08815e-12	1.00641e-11	1.00641e-10	4.65776e-13	1.78073e-13	6.33743e-11	1.13768e-11	3.35469e-10	5.27865e-13	2.16605e-11	9.32194e-10
	Human toxicity, non-cancer - metals	CTUh	2.14731e-09	8.0397e-12	3.63706e-11	3.63706e-10	2.85397e-12	1.70737e-12	1.24214e-10	6.60075e-11	1.21235e-10	5.30519e-12	4.1789e-11	2.91854e-09		Human toxicity, non-cancer - metals	CTUh	2.14731e-09	8.0397e-12	3.63706e-11	3.63706e-10	2.85397e-12	1.70737e-12	1.24214e-10	6.60075e-11	1.21235e-09	5.30519e-12	4.1789e-11	4.00965e-09
	Human toxicity, cancer - organics	CTUh	3.3895e-11	1.04426e-13	8.40716e-13	8.40716e-12	6.84336e-14	2.63517e-14	1.64289e-11	1.09191e-12	2.80239e-12	7.80713e-14	2.09663e-12	6.58399e-11		Human toxicity, cancer - organics	CTUh	3.3895e-11	1.04426e-13	8.40716e-13	8.40716e-12	6.84336e-14	2.63517e-14	1.64289e-11	1.09191e-12	2.80239e-11	7.80713e-14	2.09663e-12	9.10614e-11
	Human toxicity, cancer - inorganics	CTUh	0	0	7.28961e-21	7.28961e-20	2.18973e-22	8.35363e-23	5.36536e-20	2.52748e-20	2.42987e-20	4.37779e-22	0	1.84153e-19		Human toxicity, cancer - inorganics	CTUh	0	0	7.28961e-21	7.28961e-20	2.18973e-22	8.35363e-23	5.36536e-20	2.52748e-20	2.42987e-19	4.37779e-22	0	4.02841e-19
	Human toxicity, cancer - metals	CTUh	3.26428e-11	1.08827e-13	5.87369e-13	5.87369e-12	1.89807e-13	7.70585e-14	3.04065e-12	1.6911e-12	1.9579e-12	1.52803e-13	1.62092e-12	4.79429e-11		Human toxicity, cancer - metals	CTUh	3.26428e-11	1.08827e-13	5.87369e-13	5.87369e-12	1.89807e-13	7.70585e-14	3.04065e-12	1.6911e-12	1.9579e-11	1.52803e-13	1.62092e-12	6.5564e-11
	Ecotoxicity, freshwater - organics	CTUe	0.0413495	9.88623e-05	0.00325729	0.0325729	1.46986e-05	8.96591e-06	0.00859909	0.0022292	0.0108576	3.29099e-05	0.000426527	0.0994476		Ecotoxicity, freshwater - organics	CTUe	0.0413495	9.88623e-05	0.00325729	0.0325729	1.46986e-05	8.96591e-06	0.00859909	0.0022292	0.108576	3.29099e-05	0.000426527	0.197166
	Ecotoxicity, freshwater - inorganics	CTUe	0.267384	0.00361191	0.0114607	0.114607	0.00011231	8.2116e-05	0.0200225	0.0130356	0.0382023	0.000170706	0.13538	0.604069		Ecotoxicity, freshwater - inorganics	CTUe	0.267384	0.00361191	0.0114607	0.114607	0.00011231	8.2116e-05	0.0200225	0.0130356	0.382023	0.000170706	0.13538	0.94789
	Ecotoxicity, freshwater - metals	CTUe	4.30095	0.00916618	0.0296143	0.296143	0.00132745	0.000962412	2.77234	0.199035	0.0987143	0.00171075	0.0323089	7.74228		Ecotoxicity, freshwater - metals	CTUe	4.30095	0.00916618	0.0296143	0.296143	0.00132745	0.000962412	2.77234	0.199035	0.987143	0.00171075	0.0323089	8.63071
	Calculation:	Analizza														Calculation:	Analizza
	Results:	Valutazione dell'impatto							Scenario SB-1A							Results:	Valutazione dell'impatto							Scenario SB-1A
	Product:	1 l 0. RIF - Mortar {Europe without Switzerland}| production | APOS, U - A1-A5 (del progetto						Trasporto	RIF							Product:	1 l 0. RIF - Mortar {Europe without Switzerland}| production | APOS, U - A1-A5 (del progetto						Trasporto	RIF
	Metodo:	EN 15804 +A2 Method V1.00 / EF 3.0 normalization and weighting set						Cemento	60							Metodo:	EN 15804 +A2 Method V1.00 / EF 3.0 normalization and weighting set						Cemento	60
	Indicatore:	Caratterizzazione						Sabbia	300							Indicatore:	Caratterizzazione						Sabbia	300
	Skip categories:	Mai							-							Skip categories:	Mai							-
	Esclude processi di infrastrutture:	No							-							Esclude processi di infrastrutture:	No							-
	Esclude le emissioni di lungo termine:	No						Fabbrica-cantiere	50							Esclude le emissioni di lungo termine:	No						Fabbrica-cantiere	500
	Sorted on item:	Categoria d'impatto							-							Sorted on item:	Categoria d'impatto							-
	Sort order:	Ascendente														Sort order:	Ascendente
	0. RIF - Mortar {Europe without Switzerland}| production | APOS, U - A1-A5		A1		A2		A3				A4	A5		TOT		0. RIF - Mortar {Europe without Switzerland}| production | APOS, U - A1-A5		A1		A2		A3				A4	A5		TOT
	Categoria d'impatto	Unità	Cement, limestone 6-20% {RoW}| cement production, limestone 6-20% | Cut-off, U	Sand 0/2 mm, wet and dry quarry, production mix, at plant, undried RER S -	T. Cemento_ Transport, freight, lorry, unspecified {RER}| market for transport, freight, lorry, unspecified | APOS, U	T. Sabbia_ Transport, freight, lorry, unspecified {RER}| market for transport, freight, lorry, unspecified | APOS, U	Conveyor belt {GLO}| market for | APOS, U	Industrial machine, heavy, unspecified {RoW}| market for industrial machine, heavy, unspecified | APOS, U	Packing, cement {RoW}| processing | APOS, U	Electricity, medium voltage {IT}| market for | APOS, U	A4_ Transport, freight, lorry, unspecified {RER}| market for transport, freight, lorry, unspecified | APOS, U	A5 - Tap water {Europe without Switzerland}| market for | APOS, U	A5 - Electricity grid mix, AC, consumption mix, at consumer, 230V IT S	Totale		Categoria d'impatto	Unità	Cement, limestone 6-20% {RoW}| cement production, limestone 6-20% | Cut-off, U	Sand 0/2 mm, wet and dry quarry, production mix, at plant, undried RER S -	T. Cemento_ Transport, freight, lorry, unspecified {RER}| market for transport, freight, lorry, unspecified | APOS, U	T. Sabbia_ Transport, freight, lorry, unspecified {RER}| market for transport, freight, lorry, unspecified | APOS, U	Conveyor belt {GLO}| market for | APOS, U	Industrial machine, heavy, unspecified {RoW}| market for industrial machine, heavy, unspecified | APOS, U	Packing, cement {RoW}| processing | APOS, U	Electricity, medium voltage {IT}| market for | APOS, U	A4_ Transport, freight, lorry, unspecified {RER}| market for transport, freight, lorry, unspecified | APOS, U	A5 - Tap water {Europe without Switzerland}| market for | APOS, U	A5 - Electricity grid mix, AC, consumption mix, at consumer, 230V IT S	Totale
	Climate change	kg CO2 eq	0.333981	0.00333406	0.00357402	0.0536103	4.25953e-05	1.60247e-05	0.0101208	0.0137938	0.0119134	0.000101031	0.0427702	0.473258		Climate change	kg CO2 eq	0.333981	0.00333406	0.00357402	0.0536103	4.25953e-05	1.60247e-05	0.0101208	0.0137938	0.119134	0.000101031	0.0427702	0.580478
	Ozone depletion	kg CFC11 eq	1.13597e-08	3.96353e-10	8.20615e-10	1.23092e-08	2.40923e-12	1.03759e-12	5.34012e-10	1.91019e-09	2.73538e-09	9.05527e-12	3.75595e-10	3.04536e-08		Ozone depletion	kg CFC11 eq	1.13597e-08	3.96353e-10	8.20615e-10	1.23092e-08	2.40923e-12	1.03759e-12	5.34012e-10	1.91019e-09	2.73538e-08	9.05527e-12	3.75595e-10	5.50721e-08
	Ionising radiation	kBq U-235 eq	0.00698221	0.000626499	0.000284624	0.00426936	2.43097e-06	1.09926e-06	0.000613941	0.0015694	0.000948747	3.38063e-05	0.00169879	0.0170309		Ionising radiation	kBq U-235 eq	0.00698221	0.000626499	0.000284624	0.00426936	2.43097e-06	1.09926e-06	0.000613941	0.0015694	0.00948747	3.38063e-05	0.00169879	0.0255696
	Photochemical ozone formation	kg NMVOC eq	0.000797007	2.35428e-05	2.27668e-05	0.000341502	1.60315e-07	7.20811e-08	3.8188e-05	2.92679e-05	7.58893e-05	3.12745e-07	5.92739e-05	0.00138798		Photochemical ozone formation	kg NMVOC eq	0.000797007	2.35428e-05	2.27668e-05	0.000341502	1.60315e-07	7.20811e-08	3.8188e-05	2.92679e-05	0.000758893	3.12745e-07	5.92739e-05	0.00207099
	Particulate matter	disease inc.	6.91278e-09	3.57624e-10	3.23241e-10	4.84862e-09	3.39854e-12	1.42359e-12	2.47316e-09	2.44889e-10	1.07747e-09	5.17146e-12	8.61566e-10	1.71093e-08		Particulate matter	disease inc.	6.91278e-09	3.57624e-10	3.23241e-10	4.84862e-09	3.39854e-12	1.42359e-12	2.47316e-09	2.44889e-10	1.07747e-08	5.17146e-12	8.61566e-10	2.68066e-08
	Human toxicity, non-cancer	CTUh	2.55769e-09	1.22523e-11	5.22336e-11	7.83503e-10	3.37519e-12	1.94015e-12	2.07622e-10	7.86455e-11	1.74112e-10	5.85426e-12	6.37921e-11	3.94102e-09		Human toxicity, non-cancer	CTUh	2.55769e-09	1.22523e-11	5.22336e-11	7.83503e-10	3.37519e-12	1.94015e-12	2.07622e-10	7.86455e-11	1.74112e-09	5.85426e-12	6.37921e-11	5.50803e-09
	Human toxicity, cancer	CTUh	6.65378e-11	2.13253e-13	1.42809e-12	2.14213e-11	2.5824e-13	1.0341e-13	1.94695e-11	2.78301e-12	4.76028e-12	2.30874e-13	3.71755e-12	1.20923e-10		Human toxicity, cancer	CTUh	6.65378e-11	2.13253e-13	1.42809e-12	2.14213e-11	2.5824e-13	1.0341e-13	1.94695e-11	2.78301e-12	4.76028e-11	2.30874e-13	3.71755e-12	1.63766e-10
	Acidification	mol H+ eq	0.000993823	3.20036e-05	2.02544e-05	0.000303817	1.87976e-07	1.26133e-07	3.88234e-05	6.39752e-05	6.75148e-05	5.57177e-07	0.000107222	0.00162831		Acidification	mol H+ eq	0.000993823	3.20036e-05	2.02544e-05	0.000303817	1.87976e-07	1.26133e-07	3.88234e-05	6.39752e-05	0.000675148	5.57177e-07	0.000107222	0.00223594
	Eutrophication, freshwater	kg P eq	4.20676e-05	7.46529e-10	2.6806e-07	4.0209e-06	2.32083e-08	1.44762e-08	2.36462e-06	3.56998e-06	8.93532e-07	7.06142e-08	2.02095e-09	5.32957e-05		Eutrophication, freshwater	kg P eq	4.20676e-05	7.46529e-10	2.6806e-07	4.0209e-06	2.32083e-08	1.44762e-08	2.36462e-06	3.56998e-06	8.93532e-06	7.06142e-08	2.02095e-09	6.13375e-05
	Eutrophication, marine	kg N eq	0.000283873	8.00089e-06	7.30762e-06	0.000109614	4.25411e-08	1.96117e-08	1.7325e-05	1.00239e-05	2.43587e-05	1.08177e-07	1.90314e-05	0.000479706		Eutrophication, marine	kg N eq	0.000283873	8.00089e-06	7.30762e-06	0.000109614	4.25411e-08	1.96117e-08	1.7325e-05	1.00239e-05	0.000243587	1.08177e-07	1.90314e-05	0.000698934
	Eutrophication, terrestrial	mol N eq	0.00321064	8.75376e-05	7.98747e-05	0.00119812	4.16343e-07	2.05008e-07	0.00011213	0.000110331	0.000266249	1.01406e-06	0.000209191	0.00527571		Eutrophication, terrestrial	mol N eq	0.00321064	8.75376e-05	7.98747e-05	0.00119812	4.16343e-07	2.05008e-07	0.00011213	0.000110331	0.00266249	1.01406e-06	0.000209191	0.00767195
	Ecotoxicity, freshwater	CTUe	4.60969	0.0128769	0.0443323	0.664984	0.00145446	0.00105349	2.80096	0.2143	0.147774	0.00191437	0.168116	8.66746		Ecotoxicity, freshwater	CTUe	4.60969	0.0128769	0.0443323	0.664984	0.00145446	0.00105349	2.80096	0.2143	1.47774	0.00191437	0.168116	9.99742
	Land use	Pt	1.02996	0	0.0628542	0.942814	0.00112114	0.000676069	1.5399	0.340344	0.209514	0.00158429	0.0032731	4.13204		Land use	Pt	1.02996	0	0.0628542	0.942814	0.00112114	0.000676069	1.5399	0.340344	2.09514	0.00158429	0.0032731	6.01767
	Water use	m3 depriv.	0.0155889	0.000242583	0.000180976	0.00271463	1.86864e-05	7.06333e-06	0.00683902	0.0100199	0.000603252	0.0120691	0.0286051	0.0768892		Water use	m3 depriv.	0.0155889	0.000242583	0.000180976	0.00271463	1.86864e-05	7.06333e-06	0.00683902	0.0100199	0.00603252	0.0120691	0.0286051	0.0823184
	Resource use, fossils	MJ	1.55101	0.0570464	0.0544854	0.817281	0.000408843	0.000159496	0.0859621	0.187158	0.181618	0.00162161	0.595339	3.53209		Resource use, fossils	MJ	1.55101	0.0570464	0.0544854	0.817281	0.000408843	0.000159496	0.0859621	0.187158	1.81618	0.00162161	0.595339	5.16665
	Resource use, minerals and metals	kg Sb eq	2.31856e-05	9.86731e-11	8.37666e-08	1.2565e-06	1.5435e-09	8.13928e-10	9.75947e-08	3.94865e-08	2.79222e-07	2.881e-09	3.73648e-09	2.49513e-05		Resource use, minerals and metals	kg Sb eq	2.31856e-05	9.86731e-11	8.37666e-08	1.2565e-06	1.5435e-09	8.13928e-10	9.75947e-08	3.94865e-08	2.79222e-06	2.881e-09	3.73648e-09	2.74643e-05
	Climate change - Fossil	kg CO2 eq	0.330701	0.00337243	0.00357078	0.0535618	4.24758e-05	1.59886e-05	0.00556468	0.0125335	0.0119026	9.85918e-05	0.0428314	0.464195		Climate change - Fossil	kg CO2 eq	0.330701	0.00337243	0.00357078	0.0535618	4.24758e-05	1.59886e-05	0.00556468	0.0125335	0.119026	9.85918e-05	0.0428314	0.571319
	Climate change - Biogenic	kg CO2 eq	0.00317501	-3.8366e-05	1.83661e-06	2.75492e-05	1.25274e-08	-7.11704e-09	0.00452275	0.00124799	6.12204e-06	2.25578e-06	-6.12064e-05	0.00888394		Climate change - Biogenic	kg CO2 eq	0.00317501	-3.8366e-05	1.83661e-06	2.75492e-05	1.25274e-08	-7.11704e-09	0.00452275	0.00124799	6.12204e-05	2.25578e-06	-6.12064e-05	0.00893904
	Climate change - Land use and LU change	kg CO2 eq	0.000105076	0	1.39574e-06	2.09362e-05	1.07024e-07	4.31495e-08	3.34016e-05	1.22948e-05	4.65248e-06	1.83538e-07	0	0.00017809		Climate change - Land use and LU change	kg CO2 eq	0.000105076	0	1.39574e-06	2.09362e-05	1.07024e-07	4.31495e-08	3.34016e-05	1.22948e-05	4.65248e-05	1.83538e-07	0	0.000219963
	Human toxicity, non-cancer - organics	CTUh	3.75683e-11	1.24483e-13	5.90864e-12	8.86295e-11	5.95903e-14	5.63053e-14	2.06811e-11	2.65288e-12	1.96955e-11	2.95315e-14	3.42499e-13	1.75748e-10		Human toxicity, non-cancer - organics	CTUh	3.75683e-11	1.24483e-13	5.90864e-12	8.86295e-11	5.95903e-14	5.63053e-14	2.06811e-11	2.65288e-12	1.96955e-10	2.95315e-14	3.42499e-13	3.53007e-10
	Human toxicity, non-cancer - inorganics	CTUh	3.84349e-10	4.08815e-12	1.00641e-11	1.50961e-10	4.65776e-13	1.78073e-13	6.33743e-11	1.13768e-11	3.35469e-11	5.27865e-13	2.16605e-11	6.80592e-10		Human toxicity, non-cancer - inorganics	CTUh	3.84349e-10	4.08815e-12	1.00641e-11	1.50961e-10	4.65776e-13	1.78073e-13	6.33743e-11	1.13768e-11	3.35469e-10	5.27865e-13	2.16605e-11	9.82515e-10
	Human toxicity, non-cancer - metals	CTUh	2.14731e-09	8.0397e-12	3.63706e-11	5.45559e-10	2.85397e-12	1.70737e-12	1.24214e-10	6.60075e-11	1.21235e-10	5.30519e-12	4.1789e-11	3.10039e-09		Human toxicity, non-cancer - metals	CTUh	2.14731e-09	8.0397e-12	3.63706e-11	5.45559e-10	2.85397e-12	1.70737e-12	1.24214e-10	6.60075e-11	1.21235e-09	5.30519e-12	4.1789e-11	4.19151e-09
	Human toxicity, cancer - organics	CTUh	3.3895e-11	1.04426e-13	8.40716e-13	1.26107e-11	6.84336e-14	2.63517e-14	1.64289e-11	1.09191e-12	2.80239e-12	7.80713e-14	2.09663e-12	7.00435e-11		Human toxicity, cancer - organics	CTUh	3.3895e-11	1.04426e-13	8.40716e-13	1.26107e-11	6.84336e-14	2.63517e-14	1.64289e-11	1.09191e-12	2.80239e-11	7.80713e-14	2.09663e-12	9.5265e-11
	Human toxicity, cancer - inorganics	CTUh	0	0	7.28961e-21	1.09344e-19	2.18973e-22	8.35363e-23	5.36536e-20	2.52748e-20	2.42987e-20	4.37779e-22	0	2.20601e-19		Human toxicity, cancer - inorganics	CTUh	0	0	7.28961e-21	1.09344e-19	2.18973e-22	8.35363e-23	5.36536e-20	2.52748e-20	2.42987e-19	4.37779e-22	0	4.39289e-19
	Human toxicity, cancer - metals	CTUh	3.26428e-11	1.08827e-13	5.87369e-13	8.81053e-12	1.89807e-13	7.70585e-14	3.04065e-12	1.6911e-12	1.9579e-12	1.52803e-13	1.62092e-12	5.08798e-11		Human toxicity, cancer - metals	CTUh	3.26428e-11	1.08827e-13	5.87369e-13	8.81053e-12	1.89807e-13	7.70585e-14	3.04065e-12	1.6911e-12	1.9579e-11	1.52803e-13	1.62092e-12	6.85008e-11
	Ecotoxicity, freshwater - organics	CTUe	0.0413495	9.88623e-05	0.00325729	0.0488593	1.46986e-05	8.96591e-06	0.00859909	0.0022292	0.0108576	3.29099e-05	0.000426527	0.115734		Ecotoxicity, freshwater - organics	CTUe	0.0413495	9.88623e-05	0.00325729	0.0488593	1.46986e-05	8.96591e-06	0.00859909	0.0022292	0.108576	3.29099e-05	0.000426527	0.213453
	Ecotoxicity, freshwater - inorganics	CTUe	0.267384	0.00361191	0.0114607	0.17191	0.00011231	8.2116e-05	0.0200225	0.0130356	0.0382023	0.000170706	0.13538	0.661373		Ecotoxicity, freshwater - inorganics	CTUe	0.267384	0.00361191	0.0114607	0.17191	0.00011231	8.2116e-05	0.0200225	0.0130356	0.382023	0.000170706	0.13538	1.00519
	Ecotoxicity, freshwater - metals	CTUe	4.30095	0.00916618	0.0296143	0.444214	0.00132745	0.000962412	2.77234	0.199035	0.0987143	0.00171075	0.0323089	7.89035		Ecotoxicity, freshwater - metals	CTUe	4.30095	0.00916618	0.0296143	0.444214	0.00132745	0.000962412	2.77234	0.199035	0.987143	0.00171075	0.0323089	8.77878
	Calculation:	Analizza														Calculation:	Analizza
	Results:	Valutazione dell'impatto							Scenario SB-1A							Results:	Valutazione dell'impatto							Scenario SB-1A
	Product:	1 l 0. RIF - Mortar {Europe without Switzerland}| production | APOS, U - A1-A5 (del progetto						Trasporto	RIF							Product:	1 l 0. RIF - Mortar {Europe without Switzerland}| production | APOS, U - A1-A5 (del progetto						Trasporto	RIF
	Metodo:	EN 15804 +A2 Method V1.00 / EF 3.0 normalization and weighting set						Cemento	60							Metodo:	EN 15804 +A2 Method V1.00 / EF 3.0 normalization and weighting set						Cemento	60
	Indicatore:	Caratterizzazione						Sabbia	400							Indicatore:	Caratterizzazione						Sabbia	400
	Skip categories:	Mai							-							Skip categories:	Mai							-
	Esclude processi di infrastrutture:	No							-							Esclude processi di infrastrutture:	No							-
	Esclude le emissioni di lungo termine:	No						Fabbrica-cantiere	50							Esclude le emissioni di lungo termine:	No						Fabbrica-cantiere	500
	Sorted on item:	Categoria d'impatto							-							Sorted on item:	Categoria d'impatto							-
	Sort order:	Ascendente														Sort order:	Ascendente
	0. RIF - Mortar {Europe without Switzerland}| production | APOS, U - A1-A5		A1		A2		A3				A4	A5		TOT		0. RIF - Mortar {Europe without Switzerland}| production | APOS, U - A1-A5		A1		A2		A3				A4	A5		TOT
	Categoria d'impatto	Unità	Cement, limestone 6-20% {RoW}| cement production, limestone 6-20% | Cut-off, U	Sand 0/2 mm, wet and dry quarry, production mix, at plant, undried RER S -	T. Cemento_ Transport, freight, lorry, unspecified {RER}| market for transport, freight, lorry, unspecified | APOS, U	T. Sabbia_ Transport, freight, lorry, unspecified {RER}| market for transport, freight, lorry, unspecified | APOS, U	Conveyor belt {GLO}| market for | APOS, U	Industrial machine, heavy, unspecified {RoW}| market for industrial machine, heavy, unspecified | APOS, U	Packing, cement {RoW}| processing | APOS, U	Electricity, medium voltage {IT}| market for | APOS, U	A4_ Transport, freight, lorry, unspecified {RER}| market for transport, freight, lorry, unspecified | APOS, U	A5 - Tap water {Europe without Switzerland}| market for | APOS, U	A5 - Electricity grid mix, AC, consumption mix, at consumer, 230V IT S	Totale		Categoria d'impatto	Unità	Cement, limestone 6-20% {RoW}| cement production, limestone 6-20% | Cut-off, U	Sand 0/2 mm, wet and dry quarry, production mix, at plant, undried RER S -	T. Cemento_ Transport, freight, lorry, unspecified {RER}| market for transport, freight, lorry, unspecified | APOS, U	T. Sabbia_ Transport, freight, lorry, unspecified {RER}| market for transport, freight, lorry, unspecified | APOS, U	Conveyor belt {GLO}| market for | APOS, U	Industrial machine, heavy, unspecified {RoW}| market for industrial machine, heavy, unspecified | APOS, U	Packing, cement {RoW}| processing | APOS, U	Electricity, medium voltage {IT}| market for | APOS, U	A4_ Transport, freight, lorry, unspecified {RER}| market for transport, freight, lorry, unspecified | APOS, U	A5 - Tap water {Europe without Switzerland}| market for | APOS, U	A5 - Electricity grid mix, AC, consumption mix, at consumer, 230V IT S	Totale
	Climate change	kg CO2 eq	0.333981	0.00333406	0.00357402	0.0714803	4.25953e-05	1.60247e-05	0.0101208	0.0137938	0.0119134	0.000101031	0.0427702	0.491128		Climate change	kg CO2 eq	0.333981	0.00333406	0.00357402	0.0714803	4.25953e-05	1.60247e-05	0.0101208	0.0137938	0.119134	0.000101031	0.0427702	0.598348
	Ozone depletion	kg CFC11 eq	1.13597e-08	3.96353e-10	8.20615e-10	1.64123e-08	2.40923e-12	1.03759e-12	5.34012e-10	1.91019e-09	2.73538e-09	9.05527e-12	3.75595e-10	3.45567e-08		Ozone depletion	kg CFC11 eq	1.13597e-08	3.96353e-10	8.20615e-10	1.64123e-08	2.40923e-12	1.03759e-12	5.34012e-10	1.91019e-09	2.73538e-08	9.05527e-12	3.75595e-10	5.91752e-08
	Ionising radiation	kBq U-235 eq	0.00698221	0.000626499	0.000284624	0.00569248	2.43097e-06	1.09926e-06	0.000613941	0.0015694	0.000948747	3.38063e-05	0.00169879	0.018454		Ionising radiation	kBq U-235 eq	0.00698221	0.000626499	0.000284624	0.00569248	2.43097e-06	1.09926e-06	0.000613941	0.0015694	0.00948747	3.38063e-05	0.00169879	0.0269928
	Photochemical ozone formation	kg NMVOC eq	0.000797007	2.35428e-05	2.27668e-05	0.000455336	1.60315e-07	7.20811e-08	3.8188e-05	2.92679e-05	7.58893e-05	3.12745e-07	5.92739e-05	0.00150182		Photochemical ozone formation	kg NMVOC eq	0.000797007	2.35428e-05	2.27668e-05	0.000455336	1.60315e-07	7.20811e-08	3.8188e-05	2.92679e-05	0.000758893	3.12745e-07	5.92739e-05	0.00218482
	Particulate matter	disease inc.	6.91278e-09	3.57624e-10	3.23241e-10	6.46482e-09	3.39854e-12	1.42359e-12	2.47316e-09	2.44889e-10	1.07747e-09	5.17146e-12	8.61566e-10	1.87256e-08		Particulate matter	disease inc.	6.91278e-09	3.57624e-10	3.23241e-10	6.46482e-09	3.39854e-12	1.42359e-12	2.47316e-09	2.44889e-10	1.07747e-08	5.17146e-12	8.61566e-10	2.84228e-08
	Human toxicity, non-cancer	CTUh	2.55769e-09	1.22523e-11	5.22336e-11	1.04467e-09	3.37519e-12	1.94015e-12	2.07622e-10	7.86455e-11	1.74112e-10	5.85426e-12	6.37921e-11	4.20219e-09		Human toxicity, non-cancer	CTUh	2.55769e-09	1.22523e-11	5.22336e-11	1.04467e-09	3.37519e-12	1.94015e-12	2.07622e-10	7.86455e-11	1.74112e-09	5.85426e-12	6.37921e-11	5.7692e-09
	Human toxicity, cancer	CTUh	6.65378e-11	2.13253e-13	1.42809e-12	2.85617e-11	2.5824e-13	1.0341e-13	1.94695e-11	2.78301e-12	4.76028e-12	2.30874e-13	3.71755e-12	1.28064e-10		Human toxicity, cancer	CTUh	6.65378e-11	2.13253e-13	1.42809e-12	2.85617e-11	2.5824e-13	1.0341e-13	1.94695e-11	2.78301e-12	4.76028e-11	2.30874e-13	3.71755e-12	1.70906e-10
	Acidification	mol H+ eq	0.000993823	3.20036e-05	2.02544e-05	0.000405089	1.87976e-07	1.26133e-07	3.88234e-05	6.39752e-05	6.75148e-05	5.57177e-07	0.000107222	0.00172958		Acidification	mol H+ eq	0.000993823	3.20036e-05	2.02544e-05	0.000405089	1.87976e-07	1.26133e-07	3.88234e-05	6.39752e-05	0.000675148	5.57177e-07	0.000107222	0.00233721
	Eutrophication, freshwater	kg P eq	4.20676e-05	7.46529e-10	2.6806e-07	5.36119e-06	2.32083e-08	1.44762e-08	2.36462e-06	3.56998e-06	8.93532e-07	7.06142e-08	2.02095e-09	5.4636e-05		Eutrophication, freshwater	kg P eq	4.20676e-05	7.46529e-10	2.6806e-07	5.36119e-06	2.32083e-08	1.44762e-08	2.36462e-06	3.56998e-06	8.93532e-06	7.06142e-08	2.02095e-09	6.26778e-05
	Eutrophication, marine	kg N eq	0.000283873	8.00089e-06	7.30762e-06	0.000146152	4.25411e-08	1.96117e-08	1.7325e-05	1.00239e-05	2.43587e-05	1.08177e-07	1.90314e-05	0.000516244		Eutrophication, marine	kg N eq	0.000283873	8.00089e-06	7.30762e-06	0.000146152	4.25411e-08	1.96117e-08	1.7325e-05	1.00239e-05	0.000243587	1.08177e-07	1.90314e-05	0.000735472
	Eutrophication, terrestrial	mol N eq	0.00321064	8.75376e-05	7.98747e-05	0.00159749	4.16343e-07	2.05008e-07	0.00011213	0.000110331	0.000266249	1.01406e-06	0.000209191	0.00567508		Eutrophication, terrestrial	mol N eq	0.00321064	8.75376e-05	7.98747e-05	0.00159749	4.16343e-07	2.05008e-07	0.00011213	0.000110331	0.00266249	1.01406e-06	0.000209191	0.00807132
	Ecotoxicity, freshwater	CTUe	4.60969	0.0128769	0.0443323	0.886646	0.00145446	0.00105349	2.80096	0.2143	0.147774	0.00191437	0.168116	8.88912		Ecotoxicity, freshwater	CTUe	4.60969	0.0128769	0.0443323	0.886646	0.00145446	0.00105349	2.80096	0.2143	1.47774	0.00191437	0.168116	10.2191
	Land use	Pt	1.02996	0	0.0628542	1.25709	0.00112114	0.000676069	1.5399	0.340344	0.209514	0.00158429	0.0032731	4.44631		Land use	Pt	1.02996	0	0.0628542	1.25709	0.00112114	0.000676069	1.5399	0.340344	2.09514	0.00158429	0.0032731	6.33194
	Water use	m3 depriv.	0.0155889	0.000242583	0.000180976	0.00361951	1.86864e-05	7.06333e-06	0.00683902	0.0100199	0.000603252	0.0120691	0.0286051	0.077794		Water use	m3 depriv.	0.0155889	0.000242583	0.000180976	0.00361951	1.86864e-05	7.06333e-06	0.00683902	0.0100199	0.00603252	0.0120691	0.0286051	0.0832233
	Resource use, fossils	MJ	1.55101	0.0570464	0.0544854	1.08971	0.000408843	0.000159496	0.0859621	0.187158	0.181618	0.00162161	0.595339	3.80452		Resource use, fossils	MJ	1.55101	0.0570464	0.0544854	1.08971	0.000408843	0.000159496	0.0859621	0.187158	1.81618	0.00162161	0.595339	5.43908
	Resource use, minerals and metals	kg Sb eq	2.31856e-05	9.86731e-11	8.37666e-08	1.67533e-06	1.5435e-09	8.13928e-10	9.75947e-08	3.94865e-08	2.79222e-07	2.881e-09	3.73648e-09	2.53701e-05		Resource use, minerals and metals	kg Sb eq	2.31856e-05	9.86731e-11	8.37666e-08	1.67533e-06	1.5435e-09	8.13928e-10	9.75947e-08	3.94865e-08	2.79222e-06	2.881e-09	3.73648e-09	2.78831e-05
	Climate change - Fossil	kg CO2 eq	0.330701	0.00337243	0.00357078	0.0714157	4.24758e-05	1.59886e-05	0.00556468	0.0125335	0.0119026	9.85918e-05	0.0428314	0.482049		Climate change - Fossil	kg CO2 eq	0.330701	0.00337243	0.00357078	0.0714157	4.24758e-05	1.59886e-05	0.00556468	0.0125335	0.119026	9.85918e-05	0.0428314	0.589173
	Climate change - Biogenic	kg CO2 eq	0.00317501	-3.8366e-05	1.83661e-06	3.67322e-05	1.25274e-08	-7.11704e-09	0.00452275	0.00124799	6.12204e-06	2.25578e-06	-6.12064e-05	0.00889313		Climate change - Biogenic	kg CO2 eq	0.00317501	-3.8366e-05	1.83661e-06	3.67322e-05	1.25274e-08	-7.11704e-09	0.00452275	0.00124799	6.12204e-05	2.25578e-06	-6.12064e-05	0.00894823
	Climate change - Land use and LU change	kg CO2 eq	0.000105076	0	1.39574e-06	2.79149e-05	1.07024e-07	4.31495e-08	3.34016e-05	1.22948e-05	4.65248e-06	1.83538e-07	0	0.000185069		Climate change - Land use and LU change	kg CO2 eq	0.000105076	0	1.39574e-06	2.79149e-05	1.07024e-07	4.31495e-08	3.34016e-05	1.22948e-05	4.65248e-05	1.83538e-07	0	0.000226941
	Human toxicity, non-cancer - organics	CTUh	3.75683e-11	1.24483e-13	5.90864e-12	1.18173e-10	5.95903e-14	5.63053e-14	2.06811e-11	2.65288e-12	1.96955e-11	2.95315e-14	3.42499e-13	2.05292e-10		Human toxicity, non-cancer - organics	CTUh	3.75683e-11	1.24483e-13	5.90864e-12	1.18173e-10	5.95903e-14	5.63053e-14	2.06811e-11	2.65288e-12	1.96955e-10	2.95315e-14	3.42499e-13	3.82551e-10
	Human toxicity, non-cancer - inorganics	CTUh	3.84349e-10	4.08815e-12	1.00641e-11	2.01281e-10	4.65776e-13	1.78073e-13	6.33743e-11	1.13768e-11	3.35469e-11	5.27865e-13	2.16605e-11	7.30913e-10		Human toxicity, non-cancer - inorganics	CTUh	3.84349e-10	4.08815e-12	1.00641e-11	2.01281e-10	4.65776e-13	1.78073e-13	6.33743e-11	1.13768e-11	3.35469e-10	5.27865e-13	2.16605e-11	1.03283e-09
	Human toxicity, non-cancer - metals	CTUh	2.14731e-09	8.0397e-12	3.63706e-11	7.27411e-10	2.85397e-12	1.70737e-12	1.24214e-10	6.60075e-11	1.21235e-10	5.30519e-12	4.1789e-11	3.28224e-09		Human toxicity, non-cancer - metals	CTUh	2.14731e-09	8.0397e-12	3.63706e-11	7.27411e-10	2.85397e-12	1.70737e-12	1.24214e-10	6.60075e-11	1.21235e-09	5.30519e-12	4.1789e-11	4.37336e-09
	Human toxicity, cancer - organics	CTUh	3.3895e-11	1.04426e-13	8.40716e-13	1.68143e-11	6.84336e-14	2.63517e-14	1.64289e-11	1.09191e-12	2.80239e-12	7.80713e-14	2.09663e-12	7.42471e-11		Human toxicity, cancer - organics	CTUh	3.3895e-11	1.04426e-13	8.40716e-13	1.68143e-11	6.84336e-14	2.63517e-14	1.64289e-11	1.09191e-12	2.80239e-11	7.80713e-14	2.09663e-12	9.94686e-11
	Human toxicity, cancer - inorganics	CTUh	0	0	7.28961e-21	1.45792e-19	2.18973e-22	8.35363e-23	5.36536e-20	2.52748e-20	2.42987e-20	4.37779e-22	0	2.57049e-19		Human toxicity, cancer - inorganics	CTUh	0	0	7.28961e-21	1.45792e-19	2.18973e-22	8.35363e-23	5.36536e-20	2.52748e-20	2.42987e-19	4.37779e-22	0	4.75737e-19
	Human toxicity, cancer - metals	CTUh	3.26428e-11	1.08827e-13	5.87369e-13	1.17474e-11	1.89807e-13	7.70585e-14	3.04065e-12	1.6911e-12	1.9579e-12	1.52803e-13	1.62092e-12	5.38166e-11		Human toxicity, cancer - metals	CTUh	3.26428e-11	1.08827e-13	5.87369e-13	1.17474e-11	1.89807e-13	7.70585e-14	3.04065e-12	1.6911e-12	1.9579e-11	1.52803e-13	1.62092e-12	7.14377e-11
	Ecotoxicity, freshwater - organics	CTUe	0.0413495	9.88623e-05	0.00325729	0.0651458	1.46986e-05	8.96591e-06	0.00859909	0.0022292	0.0108576	3.29099e-05	0.000426527	0.13202		Ecotoxicity, freshwater - organics	CTUe	0.0413495	9.88623e-05	0.00325729	0.0651458	1.46986e-05	8.96591e-06	0.00859909	0.0022292	0.108576	3.29099e-05	0.000426527	0.229739
	Ecotoxicity, freshwater - inorganics	CTUe	0.267384	0.00361191	0.0114607	0.229214	0.00011231	8.2116e-05	0.0200225	0.0130356	0.0382023	0.000170706	0.13538	0.718676		Ecotoxicity, freshwater - inorganics	CTUe	0.267384	0.00361191	0.0114607	0.229214	0.00011231	8.2116e-05	0.0200225	0.0130356	0.382023	0.000170706	0.13538	1.0625
	Ecotoxicity, freshwater - metals	CTUe	4.30095	0.00916618	0.0296143	0.592286	0.00132745	0.000962412	2.77234	0.199035	0.0987143	0.00171075	0.0323089	8.03842		Ecotoxicity, freshwater - metals	CTUe	4.30095	0.00916618	0.0296143	0.592286	0.00132745	0.000962412	2.77234	0.199035	0.987143	0.00171075	0.0323089	8.92685
	Calculation:	Analizza														Calculation:	Analizza
	Results:	Valutazione dell'impatto							Scenario SB-1A							Results:	Valutazione dell'impatto							Scenario SB-1A
	Product:	1 l 0. RIF - Mortar {Europe without Switzerland}| production | APOS, U - A1-A5 (del progetto						Trasporto	RIF							Product:	1 l 0. RIF - Mortar {Europe without Switzerland}| production | APOS, U - A1-A5 (del progetto						Trasporto	RIF
	Metodo:	EN 15804 +A2 Method V1.00 / EF 3.0 normalization and weighting set						Cemento	60							Metodo:	EN 15804 +A2 Method V1.00 / EF 3.0 normalization and weighting set						Cemento	60
	Indicatore:	Caratterizzazione						Sabbia	500							Indicatore:	Caratterizzazione						Sabbia	500
	Skip categories:	Mai							-							Skip categories:	Mai							-
	Esclude processi di infrastrutture:	No							-							Esclude processi di infrastrutture:	No							-
	Esclude le emissioni di lungo termine:	No						Fabbrica-cantiere	50							Esclude le emissioni di lungo termine:	No						Fabbrica-cantiere	500
	Sorted on item:	Categoria d'impatto							-							Sorted on item:	Categoria d'impatto							-
	Sort order:	Ascendente														Sort order:	Ascendente
	0. RIF - Mortar {Europe without Switzerland}| production | APOS, U - A1-A5		A1		A2		A3				A4	A5		TOT		0. RIF - Mortar {Europe without Switzerland}| production | APOS, U - A1-A5		A1		A2		A3				A4	A5		TOT
	Categoria d'impatto	Unità	Cement, limestone 6-20% {RoW}| cement production, limestone 6-20% | Cut-off, U	Sand 0/2 mm, wet and dry quarry, production mix, at plant, undried RER S -	T. Cemento_ Transport, freight, lorry, unspecified {RER}| market for transport, freight, lorry, unspecified | APOS, U	T. Sabbia_ Transport, freight, lorry, unspecified {RER}| market for transport, freight, lorry, unspecified | APOS, U	Conveyor belt {GLO}| market for | APOS, U	Industrial machine, heavy, unspecified {RoW}| market for industrial machine, heavy, unspecified | APOS, U	Packing, cement {RoW}| processing | APOS, U	Electricity, medium voltage {IT}| market for | APOS, U	A4_ Transport, freight, lorry, unspecified {RER}| market for transport, freight, lorry, unspecified | APOS, U	A5 - Tap water {Europe without Switzerland}| market for | APOS, U	A5 - Electricity grid mix, AC, consumption mix, at consumer, 230V IT S	Totale		Categoria d'impatto	Unità	Cement, limestone 6-20% {RoW}| cement production, limestone 6-20% | Cut-off, U	Sand 0/2 mm, wet and dry quarry, production mix, at plant, undried RER S -	T. Cemento_ Transport, freight, lorry, unspecified {RER}| market for transport, freight, lorry, unspecified | APOS, U	T. Sabbia_ Transport, freight, lorry, unspecified {RER}| market for transport, freight, lorry, unspecified | APOS, U	Conveyor belt {GLO}| market for | APOS, U	Industrial machine, heavy, unspecified {RoW}| market for industrial machine, heavy, unspecified | APOS, U	Packing, cement {RoW}| processing | APOS, U	Electricity, medium voltage {IT}| market for | APOS, U	A4_ Transport, freight, lorry, unspecified {RER}| market for transport, freight, lorry, unspecified | APOS, U	A5 - Tap water {Europe without Switzerland}| market for | APOS, U	A5 - Electricity grid mix, AC, consumption mix, at consumer, 230V IT S	Totale
	Climate change	kg CO2 eq	0.333981	0.00333406	0.00357402	0.0893504	4.25953e-05	1.60247e-05	0.0101208	0.0137938	0.0119134	0.000101031	0.0427702	0.508998		Climate change	kg CO2 eq	0.333981	0.00333406	0.00357402	0.0893504	4.25953e-05	1.60247e-05	0.0101208	0.0137938	0.119134	0.000101031	0.0427702	0.616218
	Ozone depletion	kg CFC11 eq	1.13597e-08	3.96353e-10	8.20615e-10	2.05154e-08	2.40923e-12	1.03759e-12	5.34012e-10	1.91019e-09	2.73538e-09	9.05527e-12	3.75595e-10	3.86598e-08		Ozone depletion	kg CFC11 eq	1.13597e-08	3.96353e-10	8.20615e-10	2.05154e-08	2.40923e-12	1.03759e-12	5.34012e-10	1.91019e-09	2.73538e-08	9.05527e-12	3.75595e-10	6.32782e-08
	Ionising radiation	kBq U-235 eq	0.00698221	0.000626499	0.000284624	0.00711561	2.43097e-06	1.09926e-06	0.000613941	0.0015694	0.000948747	3.38063e-05	0.00169879	0.0198772		Ionising radiation	kBq U-235 eq	0.00698221	0.000626499	0.000284624	0.00711561	2.43097e-06	1.09926e-06	0.000613941	0.0015694	0.00948747	3.38063e-05	0.00169879	0.0284159
	Photochemical ozone formation	kg NMVOC eq	0.000797007	2.35428e-05	2.27668e-05	0.000569169	1.60315e-07	7.20811e-08	3.8188e-05	2.92679e-05	7.58893e-05	3.12745e-07	5.92739e-05	0.00161565		Photochemical ozone formation	kg NMVOC eq	0.000797007	2.35428e-05	2.27668e-05	0.000569169	1.60315e-07	7.20811e-08	3.8188e-05	2.92679e-05	0.000758893	3.12745e-07	5.92739e-05	0.00229865
	Particulate matter	disease inc.	6.91278e-09	3.57624e-10	3.23241e-10	8.08103e-09	3.39854e-12	1.42359e-12	2.47316e-09	2.44889e-10	1.07747e-09	5.17146e-12	8.61566e-10	2.03418e-08		Particulate matter	disease inc.	6.91278e-09	3.57624e-10	3.23241e-10	8.08103e-09	3.39854e-12	1.42359e-12	2.47316e-09	2.44889e-10	1.07747e-08	5.17146e-12	8.61566e-10	3.0039e-08
	Human toxicity, non-cancer	CTUh	2.55769e-09	1.22523e-11	5.22336e-11	1.30584e-09	3.37519e-12	1.94015e-12	2.07622e-10	7.86455e-11	1.74112e-10	5.85426e-12	6.37921e-11	4.46336e-09		Human toxicity, non-cancer	CTUh	2.55769e-09	1.22523e-11	5.22336e-11	1.30584e-09	3.37519e-12	1.94015e-12	2.07622e-10	7.86455e-11	1.74112e-09	5.85426e-12	6.37921e-11	6.03036e-09
	Human toxicity, cancer	CTUh	6.65378e-11	2.13253e-13	1.42809e-12	3.57021e-11	2.5824e-13	1.0341e-13	1.94695e-11	2.78301e-12	4.76028e-12	2.30874e-13	3.71755e-12	1.35204e-10		Human toxicity, cancer	CTUh	6.65378e-11	2.13253e-13	1.42809e-12	3.57021e-11	2.5824e-13	1.0341e-13	1.94695e-11	2.78301e-12	4.76028e-11	2.30874e-13	3.71755e-12	1.78047e-10
	Acidification	mol H+ eq	0.000993823	3.20036e-05	2.02544e-05	0.000506361	1.87976e-07	1.26133e-07	3.88234e-05	6.39752e-05	6.75148e-05	5.57177e-07	0.000107222	0.00183085		Acidification	mol H+ eq	0.000993823	3.20036e-05	2.02544e-05	0.000506361	1.87976e-07	1.26133e-07	3.88234e-05	6.39752e-05	0.000675148	5.57177e-07	0.000107222	0.00243848
	Eutrophication, freshwater	kg P eq	4.20676e-05	7.46529e-10	2.6806e-07	6.70149e-06	2.32083e-08	1.44762e-08	2.36462e-06	3.56998e-06	8.93532e-07	7.06142e-08	2.02095e-09	5.59763e-05		Eutrophication, freshwater	kg P eq	4.20676e-05	7.46529e-10	2.6806e-07	6.70149e-06	2.32083e-08	1.44762e-08	2.36462e-06	3.56998e-06	8.93532e-06	7.06142e-08	2.02095e-09	6.40181e-05
	Eutrophication, marine	kg N eq	0.000283873	8.00089e-06	7.30762e-06	0.000182691	4.25411e-08	1.96117e-08	1.7325e-05	1.00239e-05	2.43587e-05	1.08177e-07	1.90314e-05	0.000552782		Eutrophication, marine	kg N eq	0.000283873	8.00089e-06	7.30762e-06	0.000182691	4.25411e-08	1.96117e-08	1.7325e-05	1.00239e-05	0.000243587	1.08177e-07	1.90314e-05	0.000772011
	Eutrophication, terrestrial	mol N eq	0.00321064	8.75376e-05	7.98747e-05	0.00199687	4.16343e-07	2.05008e-07	0.00011213	0.000110331	0.000266249	1.01406e-06	0.000209191	0.00607446		Eutrophication, terrestrial	mol N eq	0.00321064	8.75376e-05	7.98747e-05	0.00199687	4.16343e-07	2.05008e-07	0.00011213	0.000110331	0.00266249	1.01406e-06	0.000209191	0.0084707
	Ecotoxicity, freshwater	CTUe	4.60969	0.0128769	0.0443323	1.10831	0.00145446	0.00105349	2.80096	0.2143	0.147774	0.00191437	0.168116	9.11078		Ecotoxicity, freshwater	CTUe	4.60969	0.0128769	0.0443323	1.10831	0.00145446	0.00105349	2.80096	0.2143	1.47774	0.00191437	0.168116	10.4407
	Land use	Pt	1.02996	0	0.0628542	1.57136	0.00112114	0.000676069	1.5399	0.340344	0.209514	0.00158429	0.0032731	4.76058		Land use	Pt	1.02996	0	0.0628542	1.57136	0.00112114	0.000676069	1.5399	0.340344	2.09514	0.00158429	0.0032731	6.64621
	Water use	m3 depriv.	0.0155889	0.000242583	0.000180976	0.00452439	1.86864e-05	7.06333e-06	0.00683902	0.0100199	0.000603252	0.0120691	0.0286051	0.0786989		Water use	m3 depriv.	0.0155889	0.000242583	0.000180976	0.00452439	1.86864e-05	7.06333e-06	0.00683902	0.0100199	0.00603252	0.0120691	0.0286051	0.0841282
	Resource use, fossils	MJ	1.55101	0.0570464	0.0544854	1.36213	0.000408843	0.000159496	0.0859621	0.187158	0.181618	0.00162161	0.595339	4.07695		Resource use, fossils	MJ	1.55101	0.0570464	0.0544854	1.36213	0.000408843	0.000159496	0.0859621	0.187158	1.81618	0.00162161	0.595339	5.71151
	Resource use, minerals and metals	kg Sb eq	2.31856e-05	9.86731e-11	8.37666e-08	2.09417e-06	1.5435e-09	8.13928e-10	9.75947e-08	3.94865e-08	2.79222e-07	2.881e-09	3.73648e-09	2.57889e-05		Resource use, minerals and metals	kg Sb eq	2.31856e-05	9.86731e-11	8.37666e-08	2.09417e-06	1.5435e-09	8.13928e-10	9.75947e-08	3.94865e-08	2.79222e-06	2.881e-09	3.73648e-09	2.83019e-05
	Climate change - Fossil	kg CO2 eq	0.330701	0.00337243	0.00357078	0.0892696	4.24758e-05	1.59886e-05	0.00556468	0.0125335	0.0119026	9.85918e-05	0.0428314	0.499903		Climate change - Fossil	kg CO2 eq	0.330701	0.00337243	0.00357078	0.0892696	4.24758e-05	1.59886e-05	0.00556468	0.0125335	0.119026	9.85918e-05	0.0428314	0.607027
	Climate change - Biogenic	kg CO2 eq	0.00317501	-3.8366e-05	1.83661e-06	4.59153e-05	1.25274e-08	-7.11704e-09	0.00452275	0.00124799	6.12204e-06	2.25578e-06	-6.12064e-05	0.00890231		Climate change - Biogenic	kg CO2 eq	0.00317501	-3.8366e-05	1.83661e-06	4.59153e-05	1.25274e-08	-7.11704e-09	0.00452275	0.00124799	6.12204e-05	2.25578e-06	-6.12064e-05	0.00895741
	Climate change - Land use and LU change	kg CO2 eq	0.000105076	0	1.39574e-06	3.48936e-05	1.07024e-07	4.31495e-08	3.34016e-05	1.22948e-05	4.65248e-06	1.83538e-07	0	0.000192048		Climate change - Land use and LU change	kg CO2 eq	0.000105076	0	1.39574e-06	3.48936e-05	1.07024e-07	4.31495e-08	3.34016e-05	1.22948e-05	4.65248e-05	1.83538e-07	0	0.00023392
	Human toxicity, non-cancer - organics	CTUh	3.75683e-11	1.24483e-13	5.90864e-12	1.47716e-10	5.95903e-14	5.63053e-14	2.06811e-11	2.65288e-12	1.96955e-11	2.95315e-14	3.42499e-13	2.34835e-10		Human toxicity, non-cancer - organics	CTUh	3.75683e-11	1.24483e-13	5.90864e-12	1.47716e-10	5.95903e-14	5.63053e-14	2.06811e-11	2.65288e-12	1.96955e-10	2.95315e-14	3.42499e-13	4.12094e-10
	Human toxicity, non-cancer - inorganics	CTUh	3.84349e-10	4.08815e-12	1.00641e-11	2.51602e-10	4.65776e-13	1.78073e-13	6.33743e-11	1.13768e-11	3.35469e-11	5.27865e-13	2.16605e-11	7.81233e-10		Human toxicity, non-cancer - inorganics	CTUh	3.84349e-10	4.08815e-12	1.00641e-11	2.51602e-10	4.65776e-13	1.78073e-13	6.33743e-11	1.13768e-11	3.35469e-10	5.27865e-13	2.16605e-11	1.08316e-09
	Human toxicity, non-cancer - metals	CTUh	2.14731e-09	8.0397e-12	3.63706e-11	9.09264e-10	2.85397e-12	1.70737e-12	1.24214e-10	6.60075e-11	1.21235e-10	5.30519e-12	4.1789e-11	3.46409e-09		Human toxicity, non-cancer - metals	CTUh	2.14731e-09	8.0397e-12	3.63706e-11	9.09264e-10	2.85397e-12	1.70737e-12	1.24214e-10	6.60075e-11	1.21235e-09	5.30519e-12	4.1789e-11	4.55521e-09
	Human toxicity, cancer - organics	CTUh	3.3895e-11	1.04426e-13	8.40716e-13	2.10179e-11	6.84336e-14	2.63517e-14	1.64289e-11	1.09191e-12	2.80239e-12	7.80713e-14	2.09663e-12	7.84507e-11		Human toxicity, cancer - organics	CTUh	3.3895e-11	1.04426e-13	8.40716e-13	2.10179e-11	6.84336e-14	2.63517e-14	1.64289e-11	1.09191e-12	2.80239e-11	7.80713e-14	2.09663e-12	1.03672e-10
	Human toxicity, cancer - inorganics	CTUh	0	0	7.28961e-21	1.8224e-19	2.18973e-22	8.35363e-23	5.36536e-20	2.52748e-20	2.42987e-20	4.37779e-22	0	2.93497e-19		Human toxicity, cancer - inorganics	CTUh	0	0	7.28961e-21	1.8224e-19	2.18973e-22	8.35363e-23	5.36536e-20	2.52748e-20	2.42987e-19	4.37779e-22	0	5.12185e-19
	Human toxicity, cancer - metals	CTUh	3.26428e-11	1.08827e-13	5.87369e-13	1.46842e-11	1.89807e-13	7.70585e-14	3.04065e-12	1.6911e-12	1.9579e-12	1.52803e-13	1.62092e-12	5.67535e-11		Human toxicity, cancer - metals	CTUh	3.26428e-11	1.08827e-13	5.87369e-13	1.46842e-11	1.89807e-13	7.70585e-14	3.04065e-12	1.6911e-12	1.9579e-11	1.52803e-13	1.62092e-12	7.43745e-11
	Ecotoxicity, freshwater - organics	CTUe	0.0413495	9.88623e-05	0.00325729	0.0814322	1.46986e-05	8.96591e-06	0.00859909	0.0022292	0.0108576	3.29099e-05	0.000426527	0.148307		Ecotoxicity, freshwater - organics	CTUe	0.0413495	9.88623e-05	0.00325729	0.0814322	1.46986e-05	8.96591e-06	0.00859909	0.0022292	0.108576	3.29099e-05	0.000426527	0.246026
	Ecotoxicity, freshwater - inorganics	CTUe	0.267384	0.00361191	0.0114607	0.286517	0.00011231	8.2116e-05	0.0200225	0.0130356	0.0382023	0.000170706	0.13538	0.77598		Ecotoxicity, freshwater - inorganics	CTUe	0.267384	0.00361191	0.0114607	0.286517	0.00011231	8.2116e-05	0.0200225	0.0130356	0.382023	0.000170706	0.13538	1.1198
	Ecotoxicity, freshwater - metals	CTUe	4.30095	0.00916618	0.0296143	0.740357	0.00132745	0.000962412	2.77234	0.199035	0.0987143	0.00171075	0.0323089	8.18649		Ecotoxicity, freshwater - metals	CTUe	4.30095	0.00916618	0.0296143	0.740357	0.00132745	0.000962412	2.77234	0.199035	0.987143	0.00171075	0.0323089	9.07492
	RIF1
	Categoria d'impatto	Unità	INVARIANTE	T. Sabbia_ Transport, freight, lorry, unspecified {RER}| market for transport, freight, lorry, unspecified | APOS, U	km distanza fabbrica malta - azienda HP	A4_ Transport, freight, lorry, unspecified {RER}| market for transport, freight, lorry, unspecified | APOS, U	km distanza tra fabbrica malta e cantiere	SOMMA
	Climate change	kg CO2 eq	0.407734	0.000178701	0	0.000238268	0	0.407734
	Ozone depletion	kg CFC11 eq	1.5409e-08	4.10308e-11	0	5.47077e-11	0	1.5409e-08
	Ionising radiation	kBq U-235 eq	0.0118128	1.42312e-05	0	1.89749e-05	0	0.0118128
	Photochemical ozone formation	kg NMVOC eq	0.000970592	1.13834e-06	0	1.51779e-06	0	0.000970592
	Particulate matter	disease inc.	1.11833e-08	1.61621e-11	0	2.15494e-11	0	1.11833e-08
	Human toxicity, non-cancer	CTUh	2.98341e-09	2.61168e-12	0	3.48224e-12	0	2.98341e-09
	Human toxicity, cancer	CTUh	9.47417e-11	7.14043e-14	0	9.52057e-14	0	9.47417e-11
	Acidification	mol H+ eq	0.00125697	1.01272e-06	0	1.3503e-06	0	0.00125697
	Eutrophication, freshwater	kg P eq	4.83813e-05	1.3403e-08	0	1.78706e-08	0	4.83813e-05
	Eutrophication, marine	kg N eq	0.000345732	3.65381e-07	0	4.87175e-07	0	0.000345732
	Eutrophication, terrestrial	mol N eq	0.00381134	3.99374e-06	0	5.32498e-06	0	0.00381134
	Ecotoxicity, freshwater	CTUe	7.8547	0.00221661	0	0.00295548	0	7.8547
	Land use	Pt	2.97971	0.00314271	0	0.00419028	0	2.97971
	Water use	m3 depriv.	0.0735713	9.04878e-06	0	1.2065e-05	0	0.0735713
	Resource use, fossils	MJ	2.53319	0.00272427	0	0.00363236	0	2.53319
	Resource use, minerals and metals	kg Sb eq	2.34156e-05	4.18833e-09	0	5.58444e-09	0	2.34156e-05
	Climate change - Fossil	kg CO2 eq	0.398731	0.000178539	0	0.000238052	0	0.398731
	Climate change - Biogenic	kg CO2 eq	0.00885027	9.18306e-08	0	1.22441e-07	0	0.00885027
	Climate change - Land use and LU change	kg CO2 eq	0.000152502	6.97872e-08	0	9.30496e-08	0	0.000152502
	Human toxicity, non-cancer - organics	CTUh	6.74234e-11	2.95432e-13	0	3.93909e-13	0	6.74234e-11
	Human toxicity, non-cancer - inorganics	CTUh	4.96085e-10	5.03203e-13	0	6.70938e-13	0	4.96085e-10
	Human toxicity, non-cancer - metals	CTUh	2.43359e-09	1.81853e-12	0	2.42471e-12	0	2.43359e-09
	Human toxicity, cancer - organics	CTUh	5.46304e-11	4.20358e-14	0	5.60478e-14	0	5.46304e-11
	Human toxicity, cancer - inorganics	CTUh	8.69583e-20	3.6448e-22	0	4.85974e-22	0	8.69583e-20
	Human toxicity, cancer - metals	CTUh	4.01113e-11	2.93684e-14	0	3.91579e-14	0	4.01113e-11
	Ecotoxicity, freshwater - organics	CTUe	0.0560171	0.000162864	0	0.000217153	0	0.0560171
	Ecotoxicity, freshwater - inorganics	CTUe	0.45126	0.000573035	0	0.000764047	0	0.45126
	Ecotoxicity, freshwater - metals	CTUe	7.34742	0.00148071	0	0.00197429	0	7.34742
	Non rinnovabile	MJ	2.7031	0.00289223	0	0.00385631	0	2.7031
	Rinnovabile	MJ	0.443752	4.15989e-05	0	5.54653e-05	0	0.443752
	Calculation:	Analizza
	Results:	Valutazione dell'impatto
	Product:	1 l 0. RIF - Mortar {Europe without Switzerland}| production | APOS, U - A1-A5 (del progetto
	Metodo:	EN 15804 +A2 Method V1.00 / EF 3.0 normalization and weighting set
	Indicatore:	Caratterizzazione
	Skip categories:	Mai
	Esclude processi di infrastrutture:	No
	Esclude le emissioni di lungo termine:	No
	Sorted on item:	Categoria d'impatto
	Sort order:	Ascendente
	Categoria d'impatto	Unità	Cement, limestone 6-20% {RoW}| cement production, limestone 6-20% | Cut-off, U	Sand 0/2 mm, wet and dry quarry, production mix, at plant, undried RER S -	T. Cemento_ Transport, freight, lorry, unspecified {RER}| market for transport, freight, lorry, unspecified | APOS, U		Conveyor belt {GLO}| market for | APOS, U	Industrial machine, heavy, unspecified {RoW}| market for industrial machine, heavy, unspecified | APOS, U	Packing, cement {RoW}| processing | APOS, U	Electricity, medium voltage {IT}| market for | APOS, U	A4_ Transport, freight, lorry, unspecified {RER}| market for transport, freight, lorry, unspecified | APOS, U	A5 - Tap water {Europe without Switzerland}| market for | APOS, U		A5 - Electricity grid mix, AC, consumption mix, at consumer, 230V IT S	Totale
	Climate change	kg CO2 eq	0.333981	0.00333406	0.00357402		4.25953e-05	1.60247e-05	0.0101208	0.0137938	0.119134	0.000101031		0.0427702	0.526868
	Ozone depletion	kg CFC11 eq	1.13597e-08	3.96353e-10	8.20615e-10		2.40923e-12	1.03759e-12	5.34012e-10	1.91019e-09	2.73538e-08	9.05527e-12		3.75595e-10	4.27628e-08
	Ionising radiation	kBq U-235 eq	0.00698221	0.000626499	0.000284624		2.43097e-06	1.09926e-06	0.000613941	0.0015694	0.00948747	3.38063e-05		0.00169879	0.0213003
	Photochemical ozone formation	kg NMVOC eq	0.000797007	2.35428e-05	2.27668e-05		1.60315e-07	7.20811e-08	3.8188e-05	2.92679e-05	0.000758893	3.12745e-07		5.92739e-05	0.00172948
	Particulate matter	disease inc.	6.91278e-09	3.57624e-10	3.23241e-10		3.39854e-12	1.42359e-12	2.47316e-09	2.44889e-10	1.07747e-08	5.17146e-12		8.61566e-10	2.1958e-08
	Human toxicity, non-cancer	CTUh	2.55769e-09	1.22523e-11	5.22336e-11		3.37519e-12	1.94015e-12	2.07622e-10	7.86455e-11	1.74112e-09	5.85426e-12		6.37921e-11	4.72453e-09
	Human toxicity, cancer	CTUh	6.65378e-11	2.13253e-13	1.42809e-12		2.5824e-13	1.0341e-13	1.94695e-11	2.78301e-12	4.76028e-11	2.30874e-13		3.71755e-12	1.42345e-10
	Acidification	mol H+ eq	0.000993823	3.20036e-05	2.02544e-05		1.87976e-07	1.26133e-07	3.88234e-05	6.39752e-05	0.000675148	5.57177e-07		0.000107222	0.00193212
	Eutrophication, freshwater	kg P eq	4.20676e-05	7.46529e-10	2.6806e-07		2.32083e-08	1.44762e-08	2.36462e-06	3.56998e-06	8.93532e-06	7.06142e-08		2.02095e-09	5.73166e-05
	Eutrophication, marine	kg N eq	0.000283873	8.00089e-06	7.30762e-06		4.25411e-08	1.96117e-08	1.7325e-05	1.00239e-05	0.000243587	1.08177e-07		1.90314e-05	0.00058932
	Eutrophication, terrestrial	mol N eq	0.00321064	8.75376e-05	7.98747e-05		4.16343e-07	2.05008e-07	0.00011213	0.000110331	0.00266249	1.01406e-06		0.000209191	0.00647383
	Ecotoxicity, freshwater	CTUe	4.60969	0.0128769	0.0443323		0.00145446	0.00105349	2.80096	0.2143	1.47774	0.00191437		0.168116	9.33244
	Land use	Pt	1.02996	0	0.0628542		0.00112114	0.000676069	1.5399	0.340344	2.09514	0.00158429		0.0032731	5.07485
	Water use	m3 depriv.	0.0155889	0.000242583	0.000180976		1.86864e-05	7.06333e-06	0.00683902	0.0100199	0.00603252	0.0120691		0.0286051	0.0796038
	Resource use, fossils	MJ	1.55101	0.0570464	0.0544854		0.000408843	0.000159496	0.0859621	0.187158	1.81618	0.00162161		0.595339	4.34937
	Resource use, minerals and metals	kg Sb eq	2.31856e-05	9.86731e-11	8.37666e-08		1.5435e-09	8.13928e-10	9.75947e-08	3.94865e-08	2.79222e-06	2.881e-09		3.73648e-09	2.62078e-05
	Climate change - Fossil	kg CO2 eq	0.330701	0.00337243	0.00357078		4.24758e-05	1.59886e-05	0.00556468	0.0125335	0.119026	9.85918e-05		0.0428314	0.517757
	Climate change - Biogenic	kg CO2 eq	0.00317501	-3.8366e-05	1.83661e-06		1.25274e-08	-7.11704e-09	0.00452275	0.00124799	6.12204e-05	2.25578e-06		-6.12064e-05	0.00891149
	Climate change - Land use and LU change	kg CO2 eq	0.000105076	0	1.39574e-06		1.07024e-07	4.31495e-08	3.34016e-05	1.22948e-05	4.65248e-05	1.83538e-07		0	0.000199027
	Human toxicity, non-cancer - organics	CTUh	3.75683e-11	1.24483e-13	5.90864e-12		5.95903e-14	5.63053e-14	2.06811e-11	2.65288e-12	1.96955e-10	2.95315e-14		3.42499e-13	2.64378e-10
	Human toxicity, non-cancer - inorganics	CTUh	3.84349e-10	4.08815e-12	1.00641e-11		4.65776e-13	1.78073e-13	6.33743e-11	1.13768e-11	3.35469e-10	5.27865e-13		2.16605e-11	8.31554e-10
	Human toxicity, non-cancer - metals	CTUh	2.14731e-09	8.0397e-12	3.63706e-11		2.85397e-12	1.70737e-12	1.24214e-10	6.60075e-11	1.21235e-09	5.30519e-12		4.1789e-11	3.64595e-09
	Human toxicity, cancer - organics	CTUh	3.3895e-11	1.04426e-13	8.40716e-13		6.84336e-14	2.63517e-14	1.64289e-11	1.09191e-12	2.80239e-11	7.80713e-14		2.09663e-12	8.26543e-11
	Human toxicity, cancer - inorganics	CTUh	0	0	7.28961e-21		2.18973e-22	8.35363e-23	5.36536e-20	2.52748e-20	2.42987e-19	4.37779e-22		0	3.29945e-19
	Human toxicity, cancer - metals	CTUh	3.26428e-11	1.08827e-13	5.87369e-13		1.89807e-13	7.70585e-14	3.04065e-12	1.6911e-12	1.9579e-11	1.52803e-13		1.62092e-12	5.96903e-11
	Ecotoxicity, freshwater - organics	CTUe	0.0413495	9.88623e-05	0.00325729		1.46986e-05	8.96591e-06	0.00859909	0.0022292	0.108576	3.29099e-05		0.000426527	0.164593
	Ecotoxicity, freshwater - inorganics	CTUe	0.267384	0.00361191	0.0114607		0.00011231	8.2116e-05	0.0200225	0.0130356	0.382023	0.000170706		0.13538	0.833283
	Ecotoxicity, freshwater - metals	CTUe	4.30095	0.00916618	0.0296143		0.00132745	0.000962412	2.77234	0.199035	0.987143	0.00171075		0.0323089	8.33456

## Sheet: RIF1 (CED)
								Scenario SB-1A
	Calculation:	Analizza					Trasporto	RIF											Calculation:	Analizza					Trasporto	RIF
	Results:	Valutazione dell'impatto					Cemento	60											Results:	Valutazione dell'impatto					Cemento	60
	Product:	1 l 0. RIF - Mortar {Europe without Switzerland}| production | APOS, U - A1-A5 (del progetto					Sabbia	0											Product:	1 l 0. RIF - Mortar {Europe without Switzerland}| production | APOS, U - A1-A5 (del progetto					Sabbia	0
	Metodo:	Cumulative Energy Demand V1.11 / Cumulative energy demand						-											Metodo:	Cumulative Energy Demand V1.11 / Cumulative energy demand					0	-
	Indicatore:	Caratterizzazione						-											Indicatore:	Caratterizzazione					0	-
	Skip categories:	Mai					Fabbrica-cantiere	50											Skip categories:	Mai					Fabbrica-cantiere	500
	Esclude processi di infrastrutture:	No						-											Esclude processi di infrastrutture:	No					0	-
	Esclude le emissioni di lungo termine:	No																	Esclude le emissioni di lungo termine:	No
	Sorted on item:	Categoria d'impatto																	Sorted on item:	Categoria d'impatto
	Sort order:	Ascendente																	Sort order:	Ascendente
	Categoria d'impatto	Unità	Cement, limestone 6-20% {RoW}| cement production, limestone 6-20% | Cut-off, U	Sand 0/2 mm, wet and dry quarry, production mix, at plant, undried RER S -	Conveyor belt {GLO}| market for | APOS, U	Industrial machine, heavy, unspecified {RoW}| market for industrial machine, heavy, unspecified | APOS, U	Packing, cement {RoW}| processing | APOS, U	T. Cemento_ Transport, freight, lorry, unspecified {RER}| market for transport, freight, lorry, unspecified | APOS, U	T. Sabbia_ Transport, freight, lorry, unspecified {RER}| market for transport, freight, lorry, unspecified | APOS, U	A4_ Transport, freight, lorry, unspecified {RER}| market for transport, freight, lorry, unspecified | APOS, U	A5 - Tap water {Europe without Switzerland}| market for | APOS, U	Electricity, medium voltage {IT}| market for | APOS, U	A5 - Electricity grid mix, AC, consumption mix, at consumer, 230V IT S	Totale					Categoria d'impatto	Unità	Cement, limestone 6-20% {RoW}| cement production, limestone 6-20% | Cut-off, U	Sand 0/2 mm, wet and dry quarry, production mix, at plant, undried RER S -	Conveyor belt {GLO}| market for | APOS, U	Industrial machine, heavy, unspecified {RoW}| market for industrial machine, heavy, unspecified | APOS, U	Packing, cement {RoW}| processing | APOS, U	T. Cemento_ Transport, freight, lorry, unspecified {RER}| market for transport, freight, lorry, unspecified | APOS, U	T. Sabbia_ Transport, freight, lorry, unspecified {RER}| market for transport, freight, lorry, unspecified | APOS, U	A4_ Transport, freight, lorry, unspecified {RER}| market for transport, freight, lorry, unspecified | APOS, U	A5 - Tap water {Europe without Switzerland}| market for | APOS, U	Electricity, medium voltage {IT}| market for | APOS, U	A5 - Electricity grid mix, AC, consumption mix, at consumer, 230V IT S	Totale	0	0
	Non renewable, fossil	MJ	1.58397	0.0420042	0.000401129	0.0001531	0.0827064	0.0566579	0	0.18886	0.00109098	0.174648	0.590263	2.72076	2.89585	PE-Nr			Non renewable, fossil	MJ	1.58397	0.0420042	0.000401129	0.0001531	0.0827064	0.0566579	0	1.8886	0.00113138	0.174648	0.590263	4.42053	4.63125	PE-Nr
	Non-renewable, nuclear	MJ	0.0618382	0.0180373	3.37083e-05	1.62609e-05	0.00888776	0.00118525	0	0.00395084	0.000556481	0.0268626	0.0536274	0.174996					Non-renewable, nuclear	MJ	0.0618382	0.0180373	3.37083e-05	1.62609e-05	0.00888776	0.00118525	0	0.0395084	0.000577091	0.0268626	0.0536274	0.210574
	Non-renewable, biomass	MJ	2.59786e-05	0	1.30025e-07	5.79669e-08	3.94544e-05	1.46786e-06	0	4.89287e-06	8.24608e-08	2.72832e-05	0	9.93475e-05					Non-renewable, biomass	MJ	2.59786e-05	0	1.30025e-07	5.79669e-08	3.94544e-05	1.46786e-06	0	4.89287e-05	8.55149e-08	2.72832e-05	0	0.000143386
	Renewable, biomass	MJ	0.0307156	2.21709e-07	9.54816e-06	5.15515e-06	0.216821	0.000281919	0	0.000939731	5.90941e-05	0.0106926	0	0.259525	0.446517	PE-Re			Renewable, biomass	MJ	0.0307156	2.21709e-07	9.54816e-06	5.15515e-06	0.216821	0.000281919	0	0.00939731	6.12828e-05	0.0106926	0	0.267985	0.471484	PE-Re
	Renewable, wind, solar, geothe	MJ	0.00939979	8.8283e-05	3.75769e-06	1.3538e-06	0.000936089	0.00011831	0	0.000394366	5.64929e-05	0.0119045	0.0200632	0.0429662					Renewable, wind, solar, geothe	MJ	0.00939979	8.8283e-05	3.75769e-06	1.3538e-06	0.000936089	0.00011831	0	0.00394366	5.85852e-05	0.0119045	0.0200632	0.0465175
	Renewable, water	MJ	0.0514778	0.00221042	2.56538e-05	1.02732e-05	0.00302298	0.00043175	0	0.00143917	0.000105833	0.023599	0.0617028	0.144026					Renewable, water	MJ	0.0514778	0.00221042	2.56538e-05	1.02732e-05	0.00302298	0.00043175	0	0.0143917	0.000109753	0.023599	0.0617028	0.156982
	Non rinnovabile	MJ	1.64584	0.0600415	0.000434967	0.000169419	0.0916336	0.0578446	0	0.192815	0.00164754	0.201537	0.64389	2.89585					Non rinnovabile	MJ	1.64584	0.0600415	0.000434967	0.000169419	0.0916336	0.0578446	0	1.92815	0.00170856	0.201537	0.64389	4.63125
	Rinnovabile	MJ	0.0915932	0.00229893	3.89597e-05	1.67822e-05	0.22078	0.000831979	0	0.00277326	0.00022142	0.0461961	0.0817661	0.446517					Rinnovabile	MJ	0.0915932	0.00229893	3.89597e-05	1.67822e-05	0.22078	0.000831979	0	0.0277326	0.000229621	0.0461961	0.0817661	0.471484
	Calculation:	Analizza						Scenario SB-1A
	Results:	Valutazione dell'impatto					Trasporto	RIF
	Product:	1 l 0. RIF - Mortar {Europe without Switzerland}| production | APOS, U - A1-A5 (del progetto					Cemento	60
	Metodo:	Cumulative Energy Demand V1.11 / Cumulative energy demand					Sabbia	100																		100
		Caratterizzazione						-
	Skip categories:	Mai						-
	Esclude processi di infrastrutture:	No					Fabbrica-cantiere	50																		500
	Esclude le emissioni di lungo termine:	No						-
	Sorted on item:	Categoria d'impatto
	Sort order:	Ascendente
	Categoria d'impatto	Unità	Cement, limestone 6-20% {RoW}| cement production, limestone 6-20% | Cut-off, U	Sand 0/2 mm, wet and dry quarry, production mix, at plant, undried RER S -	Conveyor belt {GLO}| market for | APOS, U	Industrial machine, heavy, unspecified {RoW}| market for industrial machine, heavy, unspecified | APOS, U	Packing, cement {RoW}| processing | APOS, U	T. Cemento_ Transport, freight, lorry, unspecified {RER}| market for transport, freight, lorry, unspecified | APOS, U	T. Sabbia_ Transport, freight, lorry, unspecified {RER}| market for transport, freight, lorry, unspecified | APOS, U	A4_ Transport, freight, lorry, unspecified {RER}| market for transport, freight, lorry, unspecified | APOS, U	A5 - Tap water {Europe without Switzerland}| market for | APOS, U	Electricity, medium voltage {IT}| market for | APOS, U	A5 - Electricity grid mix, AC, consumption mix, at consumer, 230V IT S	Totale					Categoria d'impatto	Unità	Cement, limestone 6-20% {RoW}| cement production, limestone 6-20% | Cut-off, U	Sand 0/2 mm, wet and dry quarry, production mix, at plant, undried RER S -	Conveyor belt {GLO}| market for | APOS, U	Industrial machine, heavy, unspecified {RoW}| market for industrial machine, heavy, unspecified | APOS, U	Packing, cement {RoW}| processing | APOS, U	T. Cemento_ Transport, freight, lorry, unspecified {RER}| market for transport, freight, lorry, unspecified | APOS, U	T. Sabbia_ Transport, freight, lorry, unspecified {RER}| market for transport, freight, lorry, unspecified | APOS, U	A4_ Transport, freight, lorry, unspecified {RER}| market for transport, freight, lorry, unspecified | APOS, U	A5 - Tap water {Europe without Switzerland}| market for | APOS, U	Electricity, medium voltage {IT}| market for | APOS, U	A5 - Electricity grid mix, AC, consumption mix, at consumer, 230V IT S	Totale	0	0
	Non renewable, fossil	MJ	1.58397	0.0420042	0.000401129	0.0001531	0.0827064	0.0566579	0.283289	0.18886	0.00113138	0.174648	0.590263	3.00409	3.18514	PE-Nr			Non renewable, fossil	MJ	1.58397	0.0420042	0.000401129	0.0001531	0.0827064	0.0566579	0.283289	1.8886	0.00113138	0.174648	0.590263	4.70382	4.92047	PE-Nr
	Non-renewable, nuclear	MJ	0.0618382	0.0180373	3.37083e-05	1.62609e-05	0.00888776	0.00118525	0.00592627	0.00395084	0.000577091	0.0268626	0.0536274	0.180943					Non-renewable, nuclear	MJ	0.0618382	0.0180373	3.37083e-05	1.62609e-05	0.00888776	0.00118525	0.00592627	0.0395084	0.000577091	0.0268626	0.0536274	0.2165
	Non-renewable, biomass	MJ	2.59786e-05	0	1.30025e-07	5.79669e-08	3.94544e-05	1.46786e-06	7.33931e-06	4.89287e-06	8.55149e-08	2.72832e-05	0	0.00010669					Non-renewable, biomass	MJ	2.59786e-05	0	1.30025e-07	5.79669e-08	3.94544e-05	1.46786e-06	7.33931e-06	4.89287e-05	8.55149e-08	2.72832e-05	0	0.000150726
	Renewable, biomass	MJ	0.0307156	2.21709e-07	9.54816e-06	5.15515e-06	0.216821	0.000281919	0.0014096	0.000939731	6.12828e-05	0.0106926	0	0.260937	0.450685	PE-Re			Renewable, biomass	MJ	0.0307156	2.21709e-07	9.54816e-06	5.15515e-06	0.216821	0.000281919	0.0014096	0.00939731	6.12828e-05	0.0106926	0	0.269394	0.475644	PE-Re
	Renewable, wind, solar, geothe	MJ	0.00939979	8.8283e-05	3.75769e-06	1.3538e-06	0.000936089	0.00011831	0.000591549	0.000394366	5.85852e-05	0.0119045	0.0200632	0.0435598					Renewable, wind, solar, geothe	MJ	0.00939979	8.8283e-05	3.75769e-06	1.3538e-06	0.000936089	0.00011831	0.000591549	0.00394366	5.85852e-05	0.0119045	0.0200632	0.0471091
	Renewable, water	MJ	0.0514778	0.00221042	2.56538e-05	1.02732e-05	0.00302298	0.00043175	0.00215875	0.00143917	0.000109753	0.023599	0.0617028	0.146188					Renewable, water	MJ	0.0514778	0.00221042	2.56538e-05	1.02732e-05	0.00302298	0.00043175	0.00215875	0.0143917	0.000109753	0.023599	0.0617028	0.159141
								Scenario SB-1A																		Scenario SB-1A
	Calculation:	Analizza					Trasporto	RIF											Calculation:	Analizza					Trasporto	RIF
	Results:	Valutazione dell'impatto					Cemento	60											Results:	Valutazione dell'impatto					Cemento	60
	Product:	1 l 0. RIF - Mortar {Europe without Switzerland}| production | APOS, U - A1-A5 (del progetto					Sabbia	200											Product:	1 l 0. RIF - Mortar {Europe without Switzerland}| production | APOS, U - A1-A5 (del progetto					Sabbia	200
	Metodo:	Cumulative Energy Demand V1.11 / Cumulative energy demand						-											Metodo:	Cumulative Energy Demand V1.11 / Cumulative energy demand					0	-
	Indicatore:	Caratterizzazione						-											Indicatore:	Caratterizzazione					0	-
	Skip categories:	Mai					Fabbrica-cantiere	50											Skip categories:	Mai					Fabbrica-cantiere	500
	Esclude processi di infrastrutture:	No						-											Esclude processi di infrastrutture:	No					0	-
	Esclude le emissioni di lungo termine:	No																	Esclude le emissioni di lungo termine:	No
	Sorted on item:	Categoria d'impatto																	Sorted on item:	Categoria d'impatto
	Sort order:	Ascendente																	Sort order:	Ascendente
	Categoria d'impatto	Unità	Cement, limestone 6-20% {RoW}| cement production, limestone 6-20% | Cut-off, U	Sand 0/2 mm, wet and dry quarry, production mix, at plant, undried RER S -	Conveyor belt {GLO}| market for | APOS, U	Industrial machine, heavy, unspecified {RoW}| market for industrial machine, heavy, unspecified | APOS, U	Packing, cement {RoW}| processing | APOS, U	T. Cemento_ Transport, freight, lorry, unspecified {RER}| market for transport, freight, lorry, unspecified | APOS, U	T. Sabbia_ Transport, freight, lorry, unspecified {RER}| market for transport, freight, lorry, unspecified | APOS, U	A4_ Transport, freight, lorry, unspecified {RER}| market for transport, freight, lorry, unspecified | APOS, U	A5 - Tap water {Europe without Switzerland}| market for | APOS, U	Electricity, medium voltage {IT}| market for | APOS, U	A5 - Electricity grid mix, AC, consumption mix, at consumer, 230V IT S	Totale					Categoria d'impatto	Unità	Cement, limestone 6-20% {RoW}| cement production, limestone 6-20% | Cut-off, U	Sand 0/2 mm, wet and dry quarry, production mix, at plant, undried RER S -	Conveyor belt {GLO}| market for | APOS, U	Industrial machine, heavy, unspecified {RoW}| market for industrial machine, heavy, unspecified | APOS, U	Packing, cement {RoW}| processing | APOS, U	T. Cemento_ Transport, freight, lorry, unspecified {RER}| market for transport, freight, lorry, unspecified | APOS, U	T. Sabbia_ Transport, freight, lorry, unspecified {RER}| market for transport, freight, lorry, unspecified | APOS, U	A4_ Transport, freight, lorry, unspecified {RER}| market for transport, freight, lorry, unspecified | APOS, U	A5 - Tap water {Europe without Switzerland}| market for | APOS, U	Electricity, medium voltage {IT}| market for | APOS, U	A5 - Electricity grid mix, AC, consumption mix, at consumer, 230V IT S	Totale	0	0
	Non renewable, fossil	MJ	1.58397	0.0420042	0.000401129	0.0001531	0.0827064	0.0566579	0.566579	0.18886	0.00113138	0.174648	0.590263	3.28738	3.47436	PE-Nr			Non renewable, fossil	MJ	1.58397	0.0420042	0.000401129	0.0001531	0.0827064	0.0566579	0.566579	1.8886	0.00113138	0.174648	0.590263	4.98711	5.2097	PE-Nr
	Non-renewable, nuclear	MJ	0.0618382	0.0180373	3.37083e-05	1.62609e-05	0.00888776	0.00118525	0.0118525	0.00395084	0.000577091	0.0268626	0.0536274	0.186869					Non-renewable, nuclear	MJ	0.0618382	0.0180373	3.37083e-05	1.62609e-05	0.00888776	0.00118525	0.0118525	0.0395084	0.000577091	0.0268626	0.0536274	0.222427
	Non-renewable, biomass	MJ	2.59786e-05	0	1.30025e-07	5.79669e-08	3.94544e-05	1.46786e-06	1.46786e-05	4.89287e-06	8.55149e-08	2.72832e-05	0	0.000114029					Non-renewable, biomass	MJ	2.59786e-05	0	1.30025e-07	5.79669e-08	3.94544e-05	1.46786e-06	1.46786e-05	4.89287e-05	8.55149e-08	2.72832e-05	0	0.000158065
	Renewable, biomass	MJ	0.0307156	2.21709e-07	9.54816e-06	5.15515e-06	0.216821	0.000281919	0.00281919	0.000939731	6.12828e-05	0.0106926	0	0.262346	0.454845	PE-Re			Renewable, biomass	MJ	0.0307156	2.21709e-07	9.54816e-06	5.15515e-06	0.216821	0.000281919	0.00281919	0.00939731	6.12828e-05	0.0106926	0	0.270804	0.479804	PE-Re
	Renewable, wind, solar, geothe	MJ	0.00939979	8.8283e-05	3.75769e-06	1.3538e-06	0.000936089	0.00011831	0.0011831	0.000394366	5.85852e-05	0.0119045	0.0200632	0.0441513					Renewable, wind, solar, geothe	MJ	0.00939979	8.8283e-05	3.75769e-06	1.3538e-06	0.000936089	0.00011831	0.0011831	0.00394366	5.85852e-05	0.0119045	0.0200632	0.0477006
	Renewable, water	MJ	0.0514778	0.00221042	2.56538e-05	1.02732e-05	0.00302298	0.00043175	0.0043175	0.00143917	0.000109753	0.023599	0.0617028	0.148347					Renewable, water	MJ	0.0514778	0.00221042	2.56538e-05	1.02732e-05	0.00302298	0.00043175	0.0043175	0.0143917	0.000109753	0.023599	0.0617028	0.1613
	Calculation:	Analizza																	Calculation:	Analizza					0	0
	Results:	Valutazione dell'impatto						Scenario SB-1A											Results:	Valutazione dell'impatto					0	Scenario SB-1A
	Product:	1 l 0. RIF - Mortar {Europe without Switzerland}| production | APOS, U - A1-A5 (del progetto					Trasporto	RIF											Product:	1 l 0. RIF - Mortar {Europe without Switzerland}| production | APOS, U - A1-A5 (del progetto					Trasporto	RIF
	Metodo:	Cumulative Energy Demand V1.11 / Cumulative energy demand					Cemento	60											Metodo:	Cumulative Energy Demand V1.11 / Cumulative energy demand					Cemento	60
	Indicatore:	Caratterizzazione					Sabbia	300											Indicatore:	Caratterizzazione					Sabbia	300
	Skip categories:	Mai						-											Skip categories:	Mai					0	-
	Esclude processi di infrastrutture:	No						-											Esclude processi di infrastrutture:	No					0	-
	Esclude le emissioni di lungo termine:	No					Fabbrica-cantiere	50											Esclude le emissioni di lungo termine:	No					Fabbrica-cantiere	500
	Sorted on item:	Categoria d'impatto						-											Sorted on item:	Categoria d'impatto					0	-
	Sort order:	Ascendente																	Sort order:	Ascendente					0	0
																									0	0
	Categoria d'impatto	Unità	Cement, limestone 6-20% {RoW}| cement production, limestone 6-20% | Cut-off, U	Sand 0/2 mm, wet and dry quarry, production mix, at plant, undried RER S -	Conveyor belt {GLO}| market for | APOS, U	Industrial machine, heavy, unspecified {RoW}| market for industrial machine, heavy, unspecified | APOS, U	Packing, cement {RoW}| processing | APOS, U	T. Cemento_ Transport, freight, lorry, unspecified {RER}| market for transport, freight, lorry, unspecified | APOS, U	T. Sabbia_ Transport, freight, lorry, unspecified {RER}| market for transport, freight, lorry, unspecified | APOS, U	A4_ Transport, freight, lorry, unspecified {RER}| market for transport, freight, lorry, unspecified | APOS, U	A5 - Tap water {Europe without Switzerland}| market for | APOS, U	Electricity, medium voltage {IT}| market for | APOS, U	A5 - Electricity grid mix, AC, consumption mix, at consumer, 230V IT S	Totale					Categoria d'impatto	Unità	Cement, limestone 6-20% {RoW}| cement production, limestone 6-20% | Cut-off, U	Sand 0/2 mm, wet and dry quarry, production mix, at plant, undried RER S -	Conveyor belt {GLO}| market for | APOS, U	Industrial machine, heavy, unspecified {RoW}| market for industrial machine, heavy, unspecified | APOS, U	Packing, cement {RoW}| processing | APOS, U	T. Cemento_ Transport, freight, lorry, unspecified {RER}| market for transport, freight, lorry, unspecified | APOS, U	T. Sabbia_ Transport, freight, lorry, unspecified {RER}| market for transport, freight, lorry, unspecified | APOS, U	A4_ Transport, freight, lorry, unspecified {RER}| market for transport, freight, lorry, unspecified | APOS, U	A5 - Tap water {Europe without Switzerland}| market for | APOS, U	Electricity, medium voltage {IT}| market for | APOS, U	A5 - Electricity grid mix, AC, consumption mix, at consumer, 230V IT S	Totale	0	0
	Non renewable, fossil	MJ	1.58397	0.0420042	0.000401129	0.0001531	0.0827064	0.0566579	0.849868	0.18886	0.00113138	0.174648	0.590263	3.57067	3.76358	PE-Nr			Non renewable, fossil	MJ	1.58397	0.0420042	0.000401129	0.0001531	0.0827064	0.0566579	0.849868	1.8886	0.00113138	0.174648	0.590263	5.2704	5.49892	PE-Nr
	Non-renewable, nuclear	MJ	0.0618382	0.0180373	3.37083e-05	1.62609e-05	0.00888776	0.00118525	0.0177788	0.00395084	0.000577091	0.0268626	0.0536274	0.192795					Non-renewable, nuclear	MJ	0.0618382	0.0180373	3.37083e-05	1.62609e-05	0.00888776	0.00118525	0.0177788	0.0395084	0.000577091	0.0268626	0.0536274	0.228353
	Non-renewable, biomass	MJ	2.59786e-05	0	1.30025e-07	5.79669e-08	3.94544e-05	1.46786e-06	2.20179e-05	4.89287e-06	8.55149e-08	2.72832e-05	0	0.000121368					Non-renewable, biomass	MJ	2.59786e-05	0	1.30025e-07	5.79669e-08	3.94544e-05	1.46786e-06	2.20179e-05	4.89287e-05	8.55149e-08	2.72832e-05	0	0.000165404
	Renewable, biomass	MJ	0.0307156	2.21709e-07	9.54816e-06	5.15515e-06	0.216821	0.000281919	0.00422879	0.000939731	6.12828e-05	0.0106926	0	0.263756	0.459005	PE-Re			Renewable, biomass	MJ	0.0307156	2.21709e-07	9.54816e-06	5.15515e-06	0.216821	0.000281919	0.00422879	0.00939731	6.12828e-05	0.0106926	0	0.272213	0.483964	PE-Re
	Renewable, wind, solar, geothe	MJ	0.00939979	8.8283e-05	3.75769e-06	1.3538e-06	0.000936089	0.00011831	0.00177465	0.000394366	5.85852e-05	0.0119045	0.0200632	0.0447429					Renewable, wind, solar, geothe	MJ	0.00939979	8.8283e-05	3.75769e-06	1.3538e-06	0.000936089	0.00011831	0.00177465	0.00394366	5.85852e-05	0.0119045	0.0200632	0.0482922
	Renewable, water	MJ	0.0514778	0.00221042	2.56538e-05	1.02732e-05	0.00302298	0.00043175	0.00647624	0.00143917	0.000109753	0.023599	0.0617028	0.150506					Renewable, water	MJ	0.0514778	0.00221042	2.56538e-05	1.02732e-05	0.00302298	0.00043175	0.00647624	0.0143917	0.000109753	0.023599	0.0617028	0.163458
	Calculation:	Analizza																	Calculation:	Analizza
	Results:	Valutazione dell'impatto						Scenario SB-1A											Results:	Valutazione dell'impatto					0	Scenario SB-1A
	Product:	1 l 0. RIF - Mortar {Europe without Switzerland}| production | APOS, U - A1-A5 (del progetto					Trasporto	RIF											Product:	1 l 0. RIF - Mortar {Europe without Switzerland}| production | APOS, U - A1-A5 (del progetto					Trasporto	RIF
	Metodo:	Cumulative Energy Demand V1.11 / Cumulative energy demand					Cemento	60											Metodo:	Cumulative Energy Demand V1.11 / Cumulative energy demand					Cemento	60
	Indicatore:	Caratterizzazione					Sabbia	400											Indicatore:	Caratterizzazione					Sabbia	400
	Skip categories:	Mai						-											Skip categories:	Mai					0	-
	Esclude processi di infrastrutture:	No						-											Esclude processi di infrastrutture:	No					0	-
	Esclude le emissioni di lungo termine:	No					Fabbrica-cantiere	50											Esclude le emissioni di lungo termine:	No					Fabbrica-cantiere	500
	Sorted on item:	Categoria d'impatto						-											Sorted on item:	Categoria d'impatto					0	-
	Sort order:	Ascendente																	Sort order:	Ascendente
																			0	0
	Categoria d'impatto	Unità	Cement, limestone 6-20% {RoW}| cement production, limestone 6-20% | Cut-off, U	Sand 0/2 mm, wet and dry quarry, production mix, at plant, undried RER S -	Conveyor belt {GLO}| market for | APOS, U	Industrial machine, heavy, unspecified {RoW}| market for industrial machine, heavy, unspecified | APOS, U	Packing, cement {RoW}| processing | APOS, U	T. Cemento_ Transport, freight, lorry, unspecified {RER}| market for transport, freight, lorry, unspecified | APOS, U	T. Sabbia_ Transport, freight, lorry, unspecified {RER}| market for transport, freight, lorry, unspecified | APOS, U	A4_ Transport, freight, lorry, unspecified {RER}| market for transport, freight, lorry, unspecified | APOS, U	A5 - Tap water {Europe without Switzerland}| market for | APOS, U	Electricity, medium voltage {IT}| market for | APOS, U	A5 - Electricity grid mix, AC, consumption mix, at consumer, 230V IT S	Totale					Categoria d'impatto	Unità	Cement, limestone 6-20% {RoW}| cement production, limestone 6-20% | Cut-off, U	Sand 0/2 mm, wet and dry quarry, production mix, at plant, undried RER S -	Conveyor belt {GLO}| market for | APOS, U	Industrial machine, heavy, unspecified {RoW}| market for industrial machine, heavy, unspecified | APOS, U	Packing, cement {RoW}| processing | APOS, U	T. Cemento_ Transport, freight, lorry, unspecified {RER}| market for transport, freight, lorry, unspecified | APOS, U	T. Sabbia_ Transport, freight, lorry, unspecified {RER}| market for transport, freight, lorry, unspecified | APOS, U	A4_ Transport, freight, lorry, unspecified {RER}| market for transport, freight, lorry, unspecified | APOS, U	A5 - Tap water {Europe without Switzerland}| market for | APOS, U	Electricity, medium voltage {IT}| market for | APOS, U	A5 - Electricity grid mix, AC, consumption mix, at consumer, 230V IT S	Totale	0	0
	Non renewable, fossil	MJ	1.58397	0.0420042	0.000401129	0.0001531	0.0827064	0.0566579	1.13316	0.18886	0.00113138	0.174648	0.590263	3.85395	4.0528	PE-Nr			Non renewable, fossil	MJ	1.58397	0.0420042	0.000401129	0.0001531	0.0827064	0.0566579	1.13316	1.8886	0.00113138	0.174648	0.590263	5.55369	5.78814	PE-Nr
	Non-renewable, nuclear	MJ	0.0618382	0.0180373	3.37083e-05	1.62609e-05	0.00888776	0.00118525	0.0237051	0.00395084	0.000577091	0.0268626	0.0536274	0.198721					Non-renewable, nuclear	MJ	0.0618382	0.0180373	3.37083e-05	1.62609e-05	0.00888776	0.00118525	0.0237051	0.0395084	0.000577091	0.0268626	0.0536274	0.234279
	Non-renewable, biomass	MJ	2.59786e-05	0	1.30025e-07	5.79669e-08	3.94544e-05	1.46786e-06	2.93572e-05	4.89287e-06	8.55149e-08	2.72832e-05	0	0.000128708					Non-renewable, biomass	MJ	2.59786e-05	0	1.30025e-07	5.79669e-08	3.94544e-05	1.46786e-06	2.93572e-05	4.89287e-05	8.55149e-08	2.72832e-05	0	0.000172744
	Renewable, biomass	MJ	0.0307156	2.21709e-07	9.54816e-06	5.15515e-06	0.216821	0.000281919	0.00563839	0.000939731	6.12828e-05	0.0106926	0	0.265165	0.463164	PE-Re			Renewable, biomass	MJ	0.0307156	2.21709e-07	9.54816e-06	5.15515e-06	0.216821	0.000281919	0.00563839	0.00939731	6.12828e-05	0.0106926	0	0.273623	0.488124	PE-Re
	Renewable, wind, solar, geothe	MJ	0.00939979	8.8283e-05	3.75769e-06	1.3538e-06	0.000936089	0.00011831	0.0023662	0.000394366	5.85852e-05	0.0119045	0.0200632	0.0453344					Renewable, wind, solar, geothe	MJ	0.00939979	8.8283e-05	3.75769e-06	1.3538e-06	0.000936089	0.00011831	0.0023662	0.00394366	5.85852e-05	0.0119045	0.0200632	0.0488837
	Renewable, water	MJ	0.0514778	0.00221042	2.56538e-05	1.02732e-05	0.00302298	0.00043175	0.00863499	0.00143917	0.000109753	0.023599	0.0617028	0.152665					Renewable, water	MJ	0.0514778	0.00221042	2.56538e-05	1.02732e-05	0.00302298	0.00043175	0.00863499	0.0143917	0.000109753	0.023599	0.0617028	0.165617
	Calculation:	Analizza																	Calculation:	Analizza
	Results:	Valutazione dell'impatto						Scenario SB-1A											Results:	Valutazione dell'impatto					0	Scenario SB-1A
	Product:	1 l 0. RIF - Mortar {Europe without Switzerland}| production | APOS, U - A1-A5 (del progetto					Trasporto	RIF											Product:	1 l 0. RIF - Mortar {Europe without Switzerland}| production | APOS, U - A1-A5 (del progetto					Trasporto	RIF
	Metodo:	Cumulative Energy Demand V1.11 / Cumulative energy demand					Cemento	60											Metodo:	Cumulative Energy Demand V1.11 / Cumulative energy demand					Cemento	60
	Indicatore:	Caratterizzazione					Sabbia	500											Indicatore:	Caratterizzazione					Sabbia	500
	Skip categories:	Mai						-											Skip categories:	Mai					0	-
	Esclude processi di infrastrutture:	No						-											Esclude processi di infrastrutture:	No					0	-
	Esclude le emissioni di lungo termine:	No					Fabbrica-cantiere	50											Esclude le emissioni di lungo termine:	No					Fabbrica-cantiere	500
	Sorted on item:	Categoria d'impatto						-											Sorted on item:	Categoria d'impatto					0	-
	Sort order:	Ascendente																	Sort order:	Ascendente
	Categoria d'impatto	Unità	Cement, limestone 6-20% {RoW}| cement production, limestone 6-20% | Cut-off, U	Sand 0/2 mm, wet and dry quarry, production mix, at plant, undried RER S -	Conveyor belt {GLO}| market for | APOS, U	Industrial machine, heavy, unspecified {RoW}| market for industrial machine, heavy, unspecified | APOS, U	Packing, cement {RoW}| processing | APOS, U	T. Cemento_ Transport, freight, lorry, unspecified {RER}| market for transport, freight, lorry, unspecified | APOS, U	T. Sabbia_ Transport, freight, lorry, unspecified {RER}| market for transport, freight, lorry, unspecified | APOS, U	A4_ Transport, freight, lorry, unspecified {RER}| market for transport, freight, lorry, unspecified | APOS, U	A5 - Tap water {Europe without Switzerland}| market for | APOS, U	Electricity, medium voltage {IT}| market for | APOS, U	A5 - Electricity grid mix, AC, consumption mix, at consumer, 230V IT S	Totale					Categoria d'impatto	Unità	Cement, limestone 6-20% {RoW}| cement production, limestone 6-20% | Cut-off, U	Sand 0/2 mm, wet and dry quarry, production mix, at plant, undried RER S -	Conveyor belt {GLO}| market for | APOS, U	Industrial machine, heavy, unspecified {RoW}| market for industrial machine, heavy, unspecified | APOS, U	Packing, cement {RoW}| processing | APOS, U	T. Cemento_ Transport, freight, lorry, unspecified {RER}| market for transport, freight, lorry, unspecified | APOS, U	T. Sabbia_ Transport, freight, lorry, unspecified {RER}| market for transport, freight, lorry, unspecified | APOS, U	A4_ Transport, freight, lorry, unspecified {RER}| market for transport, freight, lorry, unspecified | APOS, U	A5 - Tap water {Europe without Switzerland}| market for | APOS, U	Electricity, medium voltage {IT}| market for | APOS, U	A5 - Electricity grid mix, AC, consumption mix, at consumer, 230V IT S	Totale	0	0
	Non renewable, fossil	MJ	1.58397	0.0420042	0.000401129	0.0001531	0.0827064	0.0566579	1.41645	0.18886	0.00113138	0.174648	0.590263	4.13724	4.34203	PE-Nr			Non renewable, fossil	MJ	1.58397	0.0420042	0.000401129	0.0001531	0.0827064	0.0566579	1.41645	1.8886	0.00113138	0.174648	0.590263	5.83698	6.07737	PE-Nr
	Non-renewable, nuclear	MJ	0.0618382	0.0180373	3.37083e-05	1.62609e-05	0.00888776	0.00118525	0.0296313	0.00395084	0.000577091	0.0268626	0.0536274	0.204648					Non-renewable, nuclear	MJ	0.0618382	0.0180373	3.37083e-05	1.62609e-05	0.00888776	0.00118525	0.0296313	0.0395084	0.000577091	0.0268626	0.0536274	0.240205
	Non-renewable, biomass	MJ	2.59786e-05	0	1.30025e-07	5.79669e-08	3.94544e-05	1.46786e-06	3.66965e-05	4.89287e-06	8.55149e-08	2.72832e-05	0	0.000136047					Non-renewable, biomass	MJ	2.59786e-05	0	1.30025e-07	5.79669e-08	3.94544e-05	1.46786e-06	3.66965e-05	4.89287e-05	8.55149e-08	2.72832e-05	0	0.000180083
	Renewable, biomass	MJ	0.0307156	2.21709e-07	9.54816e-06	5.15515e-06	0.216821	0.000281919	0.00704799	0.000939731	6.12828e-05	0.0106926	0	0.266575	0.467324	PE-Re			Renewable, biomass	MJ	0.0307156	2.21709e-07	9.54816e-06	5.15515e-06	0.216821	0.000281919	0.00704799	0.00939731	6.12828e-05	0.0106926	0	0.275033	0.492284	PE-Re
	Renewable, wind, solar, geothe	MJ	0.00939979	8.8283e-05	3.75769e-06	1.3538e-06	0.000936089	0.00011831	0.00295775	0.000394366	5.85852e-05	0.0119045	0.0200632	0.045926					Renewable, wind, solar, geothe	MJ	0.00939979	8.8283e-05	3.75769e-06	1.3538e-06	0.000936089	0.00011831	0.00295775	0.00394366	5.85852e-05	0.0119045	0.0200632	0.0494753
	Renewable, water	MJ	0.0514778	0.00221042	2.56538e-05	1.02732e-05	0.00302298	0.00043175	0.0107937	0.00143917	0.000109753	0.023599	0.0617028	0.154823					Renewable, water	MJ	0.0514778	0.00221042	2.56538e-05	1.02732e-05	0.00302298	0.00043175	0.0107937	0.0143917	0.000109753	0.023599	0.0617028	0.167776

## Sheet: DELTA
	Calculation:	Analizza																		Calculation:	Analizza
	Results:	Valutazione dell'impatto							DELTA (SB)											Results:	Valutazione dell'impatto							DELTA (SB)
	Product:	1 l 0. DELTA - Mortar {Europe without Switzerland}| production | APOS, U - A1-A5 (del progetto						Trasporto	RIF											Product:	1 l 0. DELTA - Mortar {Europe without Switzerland}| production | APOS, U - A1-A5 (del progetto						Trasporto	RIF
	Metodo:	EN 15804 +A2 Method V1.00 / EF 3.0 normalization and weighting set						Cemento	60											Metodo:	EN 15804 +A2 Method V1.00 / EF 3.0 normalization and weighting set						Cemento	60
	Indicatore:	Caratterizzazione							-											Indicatore:	Caratterizzazione							-
	Skip categories:	Mai						DELTA	53											Skip categories:	Mai						DELTA	53
	Esclude processi di infrastrutture:	No							-											Esclude processi di infrastrutture:	No							-
	Esclude le emissioni di lungo termine:	No						Fabbrica-cantiere	50											Esclude le emissioni di lungo termine:	No						Fabbrica-cantiere	500
	Sorted on item:	Categoria d'impatto							-											Sorted on item:	Categoria d'impatto							-
	Sort order:	Ascendente																		Sort order:	Ascendente
	1 l 0. DELTA - Mortar {Europe without Switzerland}| production | APOS, U - A1-A5 (del progetto		A1	A2		A3					A4	A5		Benefici mancato smaltimento		TOT				1 l 0. DELTA - Mortar {Europe without Switzerland}| production | APOS, U - A1-A5 (del progetto		A1	A2		A3					A4	A5		Benefici mancato smaltimento		TOT
	Categoria d'impatto	Unità	Cement, limestone 6-20% {RoW}| cement production, limestone 6-20% | Cut-off, U	T. Cemento_ Transport, freight, lorry, unspecified {RER}| market for transport, freight, lorry, unspecified | APOS, U	T. DELTA _ Transport, freight, lorry, unspecified {RER}| market for transport, freight, lorry, unspecified | APOS, U	Conveyor belt {GLO}| market for | APOS, U	Industrial machine, heavy, unspecified {RoW}| market for industrial machine, heavy, unspecified | APOS, U	Packing, cement {RoW}| processing | APOS, U	Rock crushing {RER}| processing | APOS, U	Electricity, medium voltage {IT}| market for | APOS, U	A4_ Transport, freight, lorry, unspecified {RER}| market for transport, freight, lorry, unspecified | APOS, U	A5 - Tap water {Europe without Switzerland}| market for | APOS, U	A5 - Electricity grid mix, AC, consumption mix, at consumer, 230V IT S	Benefici - Transport, freight, lorry, unspecified {RER}| market for transport, freight, lorry, unspecified | APOS, U	Benefici - Waste plastic, mixture {RoW}| treatment of waste plastic, mixture, sanitary landfill | APOS, U	Totale				Categoria d'impatto	Unità	Cement, limestone 6-20% {RoW}| cement production, limestone 6-20% | Cut-off, U	T. Cemento_ Transport, freight, lorry, unspecified {RER}| market for transport, freight, lorry, unspecified | APOS, U	T. DELTA _ Transport, freight, lorry, unspecified {RER}| market for transport, freight, lorry, unspecified | APOS, U	Conveyor belt {GLO}| market for | APOS, U	Industrial machine, heavy, unspecified {RoW}| market for industrial machine, heavy, unspecified | APOS, U	Packing, cement {RoW}| processing | APOS, U	Rock crushing {RER}| processing | APOS, U	Electricity, medium voltage {IT}| market for | APOS, U	A4_ Transport, freight, lorry, unspecified {RER}| market for transport, freight, lorry, unspecified | APOS, U	A5 - Tap water {Europe without Switzerland}| market for | APOS, U	A5 - Electricity grid mix, AC, consumption mix, at consumer, 230V IT S	Benefici - Transport, freight, lorry, unspecified {RER}| market for transport, freight, lorry, unspecified | APOS, U	Benefici - Waste plastic, mixture {RoW}| treatment of waste plastic, mixture, sanitary landfill | APOS, U	Totale
	Climate change	kg CO2 eq	0.333981	0.00357402	0.0063141	4.25953e-05	1.60247e-05	0.00759062	0.000292848	0.0137938	0.00893504	0.000104639	0.0427702	-0.00238268	-0.105548	0.309484				Climate change	kg CO2 eq	0.333981	0.00357402	0.0063141	4.25953e-05	1.60247e-05	0.00759062	0.000292848	0.0137938	0.0893504	0.000104639	0.0427702	-0.00238268	-0.105548	0.3899
	Ozone depletion	kg CFC11 eq	1.13597e-08	8.20615e-10	1.44975e-09	2.40923e-12	1.03759e-12	4.00509e-10	2.6624e-11	1.91019e-09	2.05154e-09	9.37867e-12	3.75595e-10	-5.47077e-10	-2.97208e-09	1.48882e-08				Ozone depletion	kg CFC11 eq	1.13597e-08	8.20615e-10	1.44975e-09	2.40923e-12	1.03759e-12	4.00509e-10	2.6624e-11	1.91019e-09	2.05154e-08	9.37867e-12	3.75595e-10	-5.47077e-10	-2.97208e-09	3.33521e-08
	Ionising radiation	kBq U-235 eq	0.00698221	0.000284624	0.000502836	2.43097e-06	1.09926e-06	0.000460456	0.000150154	0.0015694	0.000711561	3.50137e-05	0.00169879	-0.000189749	-0.00114176	0.0110671				Ionising radiation	kBq U-235 eq	0.00698221	0.000284624	0.000502836	2.43097e-06	1.09926e-06	0.000460456	0.000150154	0.0015694	0.00711561	3.50137e-05	0.00169879	-0.000189749	-0.00114176	0.0174711
	Photochemical ozone formation	kg NMVOC eq	0.000797007	2.27668e-05	4.02213e-05	1.60315e-07	7.20811e-08	2.8641e-05	6.80282e-07	2.92679e-05	5.69169e-05	3.23915e-07	5.92739e-05	-1.51779e-05	-0.000112194	0.00090796				Photochemical ozone formation	kg NMVOC eq	0.000797007	2.27668e-05	4.02213e-05	1.60315e-07	7.20811e-08	2.8641e-05	6.80282e-07	2.92679e-05	0.000569169	3.23915e-07	5.92739e-05	-1.51779e-05	-0.000112194	0.00142021
	Particulate matter	disease inc.	6.91278e-09	3.23241e-10	5.71059e-10	3.39854e-12	1.42359e-12	1.85487e-09	5.58212e-12	2.44889e-10	8.08103e-10	5.35616e-12	8.61566e-10	-2.15494e-10	-1.58724e-09	9.78954e-09				Particulate matter	disease inc.	6.91278e-09	3.23241e-10	5.71059e-10	3.39854e-12	1.42359e-12	1.85487e-09	5.58212e-12	2.44889e-10	8.08103e-09	5.35616e-12	8.61566e-10	-2.15494e-10	-1.58724e-09	1.70625e-08
	Human toxicity, non-cancer	CTUh	2.55769e-09	5.22336e-11	9.22793e-11	3.37519e-12	1.94015e-12	1.55717e-10	4.94185e-12	7.86455e-11	1.30584e-10	6.06334e-12	6.37921e-11	-3.48224e-11	-2.19512e-10	2.89293e-09				Human toxicity, non-cancer	CTUh	2.55769e-09	5.22336e-11	9.22793e-11	3.37519e-12	1.94015e-12	1.55717e-10	4.94185e-12	7.86455e-11	1.30584e-09	6.06334e-12	6.37921e-11	-3.48224e-11	-2.19512e-10	4.06818e-09
	Human toxicity, cancer	CTUh	6.65378e-11	1.42809e-12	2.52295e-12	2.5824e-13	1.0341e-13	1.46021e-11	1.64823e-13	2.78301e-12	3.57021e-12	2.3912e-13	3.71755e-12	-9.52057e-13	-6.20715e-12	8.87681e-11				Human toxicity, cancer	CTUh	6.65378e-11	1.42809e-12	2.52295e-12	2.5824e-13	1.0341e-13	1.46021e-11	1.64823e-13	2.78301e-12	3.57021e-11	2.3912e-13	3.71755e-12	-9.52057e-13	-6.20715e-12	1.209e-10
	Acidification	mol H+ eq	0.000993823	2.02544e-05	3.57829e-05	1.87976e-07	1.26133e-07	2.91175e-05	1.55547e-06	6.39752e-05	5.06361e-05	5.77076e-07	0.000107222	-1.3503e-05	-8.75994e-05	0.00120216				Acidification	mol H+ eq	0.000993823	2.02544e-05	3.57829e-05	1.87976e-07	1.26133e-07	2.91175e-05	1.55547e-06	6.39752e-05	0.000506361	5.77076e-07	0.000107222	-1.3503e-05	-8.75994e-05	0.00165788
	Eutrophication, freshwater	kg P eq	4.20676e-05	2.6806e-07	4.73572e-07	2.32083e-08	1.44762e-08	1.77347e-06	2.74256e-07	3.56998e-06	6.70149e-07	7.31361e-08	2.02095e-09	-1.78706e-07	-1.75032e-06	4.72809e-05				Eutrophication, freshwater	kg P eq	4.20676e-05	2.6806e-07	4.73572e-07	2.32083e-08	1.44762e-08	1.77347e-06	2.74256e-07	3.56998e-06	6.70149e-06	7.31361e-08	2.02095e-09	-1.78706e-07	-1.75032e-06	5.33122e-05
	Eutrophication, marine	kg N eq	0.000283873	7.30762e-06	1.29101e-05	4.25411e-08	1.96117e-08	1.29937e-05	2.75453e-07	1.00239e-05	1.82691e-05	1.12041e-07	1.90314e-05	-4.87175e-06	-0.00192533	-0.00156534				Eutrophication, marine	kg N eq	0.000283873	7.30762e-06	1.29101e-05	4.25411e-08	1.96117e-08	1.29937e-05	2.75453e-07	1.00239e-05	0.000182691	1.12041e-07	1.90314e-05	-4.87175e-06	-0.00192533	-0.00140092
	Eutrophication, terrestrial	mol N eq	0.00321064	7.98747e-05	0.000141112	4.16343e-07	2.05008e-07	8.40974e-05	2.44947e-06	0.000110331	0.000199687	1.05028e-06	0.000209191	-5.32498e-05	-0.00031506	0.00367074				Eutrophication, terrestrial	mol N eq	0.00321064	7.98747e-05	0.000141112	4.16343e-07	2.05008e-07	8.40974e-05	2.44947e-06	0.000110331	0.00199687	1.05028e-06	0.000209191	-5.32498e-05	-0.00031506	0.00546792
	Ecotoxicity, freshwater	CTUe	4.60969	0.0443323	0.0783204	0.00145446	0.00105349	2.10072	0.00426773	0.2143	0.110831	0.00198274	0.168116	-0.0295549	-0.487935	6.81758				Ecotoxicity, freshwater	CTUe	4.60969	0.0443323	0.0783204	0.00145446	0.00105349	2.10072	0.00426773	0.2143	1.10831	0.00198274	0.168116	-0.0295549	-0.487935	7.81505
	Land use	Pt	1.02996	0.0628542	0.111043	0.00112114	0.000676069	1.15493	0.0047623	0.340344	0.157136	0.00164087	0.0032731	-0.0419028	-0.578601	2.24723				Land use	Pt	1.02996	0.0628542	0.111043	0.00112114	0.000676069	1.15493	0.0047623	0.340344	1.57136	0.00164087	0.0032731	-0.0419028	-0.578601	3.66145
	Water use	m3 depriv.	0.0155889	0.000180976	0.000319723	1.86864e-05	7.06333e-06	0.00512927	8.34229e-05	0.0100199	0.000452439	0.0125001	0.0286051	-0.00012065	-0.0097948	0.0629901				Water use	m3 depriv.	0.0155889	0.000180976	0.000319723	1.86864e-05	7.06333e-06	0.00512927	8.34229e-05	0.0100199	0.00452439	0.0125001	0.0286051	-0.00012065	-0.0097948	0.0670621
	Resource use, fossils	MJ	1.55101	0.0544854	0.0962575	0.000408843	0.000159496	0.0644715	0.00577662	0.187158	0.136213	0.00167952	0.595339	-0.0363236	-0.2303	2.42634				Resource use, fossils	MJ	1.55101	0.0544854	0.0962575	0.000408843	0.000159496	0.0644715	0.00577662	0.187158	1.36213	0.00167952	0.595339	-0.0363236	-0.2303	3.65226
	Resource use, minerals and metals	kg Sb eq	2.31856e-05	8.37666e-08	1.47988e-07	1.5435e-09	8.13928e-10	7.3196e-08	1.28335e-09	3.94865e-08	2.09417e-07	2.98389e-09	3.73648e-09	-5.58444e-08	-1.17685e-07	2.35763e-05				Resource use, minerals and metals	kg Sb eq	2.31856e-05	8.37666e-08	1.47988e-07	1.5435e-09	8.13928e-10	7.3196e-08	1.28335e-09	3.94865e-08	2.09417e-06	2.98389e-09	3.73648e-09	-5.58444e-08	-1.17685e-07	2.54611e-05
	Climate change - Fossil	kg CO2 eq	0.330701	0.00357078	0.00630839	4.24758e-05	1.59886e-05	0.00417351	0.000282382	0.0125335	0.00892696	0.000102113	0.0428314	-0.00238052	-0.105485	0.301624				Climate change - Fossil	kg CO2 eq	0.330701	0.00357078	0.00630839	4.24758e-05	1.59886e-05	0.00417351	0.000282382	0.0125335	0.0892696	0.000102113	0.0428314	-0.00238052	-0.105485	0.381966
	Climate change - Biogenic	kg CO2 eq	0.00317501	1.83661e-06	3.24468e-06	1.25274e-08	-7.11704e-09	0.00339206	9.7275e-06	0.00124799	4.59153e-06	2.33634e-06	-6.12064e-05	-1.22441e-06	-5.74701e-05	0.0077169				Climate change - Biogenic	kg CO2 eq	0.00317501	1.83661e-06	3.24468e-06	1.25274e-08	-7.11704e-09	0.00339206	9.7275e-06	0.00124799	4.59153e-05	2.33634e-06	-6.12064e-05	-1.22441e-06	-5.74701e-05	0.00775822
	Climate change - Land use and LU change	kg CO2 eq	0.000105076	1.39574e-06	2.46582e-06	1.07024e-07	4.31495e-08	2.50512e-05	7.38199e-07	1.22948e-05	3.48936e-06	1.90093e-07	0	-9.30496e-07	-6.11337e-06	0.000143807				Climate change - Land use and LU change	kg CO2 eq	0.000105076	1.39574e-06	2.46582e-06	1.07024e-07	4.31495e-08	2.50512e-05	7.38199e-07	1.22948e-05	3.48936e-05	1.90093e-07	0	-9.30496e-07	-6.11337e-06	0.000175212
	Human toxicity, non-cancer - organics	CTUh	3.75683e-11	5.90864e-12	1.04386e-11	5.95903e-14	5.63053e-14	1.55108e-11	5.17015e-14	2.65288e-12	1.47716e-11	3.05862e-14	3.42499e-13	-3.93909e-12	-1.07067e-10	-2.36145e-11				Human toxicity, non-cancer - organics	CTUh	3.75683e-11	5.90864e-12	1.04386e-11	5.95903e-14	5.63053e-14	1.55108e-11	5.17015e-14	2.65288e-12	1.47716e-10	3.05862e-14	3.42499e-13	-3.93909e-12	-1.07067e-10	1.0933e-10
	Human toxicity, non-cancer - inorganics	CTUh	3.84349e-10	1.00641e-11	1.77799e-11	4.65776e-13	1.78073e-13	4.75308e-11	3.97272e-13	1.13768e-11	2.51602e-11	5.46717e-13	2.16605e-11	-6.70938e-12	-7.33072e-11	4.39492e-10				Human toxicity, non-cancer - inorganics	CTUh	3.84349e-10	1.00641e-11	1.77799e-11	4.65776e-13	1.78073e-13	4.75308e-11	3.97272e-13	1.13768e-11	2.51602e-10	5.46717e-13	2.16605e-11	-6.70938e-12	-7.33072e-11	6.65934e-10
	Human toxicity, non-cancer - metals	CTUh	2.14731e-09	3.63706e-11	6.42547e-11	2.85397e-12	1.70737e-12	9.31608e-11	4.51352e-12	6.60075e-11	9.09264e-11	5.49466e-12	4.1789e-11	-2.4247e-11	-1.42758e-10	2.38738e-09				Human toxicity, non-cancer - metals	CTUh	2.14731e-09	3.63706e-11	6.42547e-11	2.85397e-12	1.70737e-12	9.31608e-11	4.51352e-12	6.60075e-11	9.09264e-10	5.49466e-12	4.1789e-11	-2.4247e-11	-1.42758e-10	3.20572e-09
	Human toxicity, cancer - organics	CTUh	3.3895e-11	8.40716e-13	1.48527e-12	6.84336e-14	2.63517e-14	1.23216e-11	5.16149e-14	1.09191e-12	2.10179e-12	8.08595e-14	2.09663e-12	-5.60478e-13	-2.13486e-12	5.13649e-11				Human toxicity, cancer - organics	CTUh	3.3895e-11	8.40716e-13	1.48527e-12	6.84336e-14	2.63517e-14	1.23216e-11	5.16149e-14	1.09191e-12	2.10179e-11	8.08595e-14	2.09663e-12	-5.60478e-13	-2.13486e-12	7.0281e-11
	Human toxicity, cancer - inorganics	CTUh	0	7.28961e-21	1.28783e-20	2.18973e-22	8.35363e-23	4.02402e-20	2.3319e-21	2.52748e-20	1.8224e-20	4.53414e-22	0	-4.85974e-21	-2.80337e-20	7.41013e-20				Human toxicity, cancer - inorganics	CTUh	0	7.28961e-21	1.28783e-20	2.18973e-22	8.35363e-23	4.02402e-20	2.3319e-21	2.52748e-20	1.8224e-19	4.53414e-22	0	-4.85974e-21	-2.80337e-20	2.38117e-19
	Human toxicity, cancer - metals	CTUh	3.26428e-11	5.87369e-13	1.03768e-12	1.89807e-13	7.70585e-14	2.28048e-12	1.13209e-13	1.6911e-12	1.46842e-12	1.5826e-13	1.62092e-12	-3.91579e-13	-4.07228e-12	3.74033e-11				Human toxicity, cancer - metals	CTUh	3.26428e-11	5.87369e-13	1.03768e-12	1.89807e-13	7.70585e-14	2.28048e-12	1.13209e-13	1.6911e-12	1.46842e-11	1.5826e-13	1.62092e-12	-3.91579e-13	-4.07228e-12	5.06191e-11
	Ecotoxicity, freshwater - organics	CTUe	0.0413495	0.00325729	0.00575454	1.46986e-05	8.96591e-06	0.00644932	2.90202e-05	0.0022292	0.00814322	3.40852e-05	0.000426527	-0.00217153	-0.012736	0.0527888				Ecotoxicity, freshwater - organics	CTUe	0.0413495	0.00325729	0.00575454	1.46986e-05	8.96591e-06	0.00644932	2.90202e-05	0.0022292	0.0814322	3.40852e-05	0.000426527	-0.00217153	-0.012736	0.126078
	Ecotoxicity, freshwater - inorganics	CTUe	0.267384	0.0114607	0.0202472	0.00011231	8.2116e-05	0.0150168	0.000230669	0.0130356	0.0286517	0.000176803	0.13538	-0.00764047	-0.329888	0.154249				Ecotoxicity, freshwater - inorganics	CTUe	0.267384	0.0114607	0.0202472	0.00011231	8.2116e-05	0.0150168	0.000230669	0.0130356	0.286517	0.000176803	0.13538	-0.00764047	-0.329888	0.412115
	Ecotoxicity, freshwater - metals	CTUe	4.30095	0.0296143	0.0523186	0.00132745	0.000962412	2.07926	0.00400804	0.199035	0.0740357	0.00177185	0.0323089	-0.0197429	-0.145311	6.61054				Ecotoxicity, freshwater - metals	CTUe	4.30095	0.0296143	0.0523186	0.00132745	0.000962412	2.07926	0.00400804	0.199035	0.740357	0.00177185	0.0323089	-0.0197429	-0.145311	7.27686
	Calculation:	Analizza																		Calculation:	Analizza
	Results:	Valutazione dell'impatto							DELTA (SB)											Results:	Valutazione dell'impatto							DELTA (SB)
	Product:	1 l 0. DELTA - Mortar {Europe without Switzerland}| production | APOS, U - A1-A5 (del progetto						Trasporto	RIF											Product:	1 l 0. DELTA - Mortar {Europe without Switzerland}| production | APOS, U - A1-A5 (del progetto						Trasporto	RIF
	Metodo:	EN 15804 +A2 Method V1.00 / EF 3.0 normalization and weighting set						Cemento	60											Metodo:	EN 15804 +A2 Method V1.00 / EF 3.0 normalization and weighting set						Cemento	60
	Indicatore:	Caratterizzazione							-											Indicatore:	Caratterizzazione							-
	Skip categories:	Mai						DELTA	0											Skip categories:	Mai						DELTA	0
	Esclude processi di infrastrutture:	No							-											Esclude processi di infrastrutture:	No							-
	Esclude le emissioni di lungo termine:	No						Fabbrica-cantiere	50											Esclude le emissioni di lungo termine:	No						Fabbrica-cantiere	500
	Sorted on item:	Categoria d'impatto							-											Sorted on item:	Categoria d'impatto							-
	Sort order:	Ascendente																		Sort order:	Ascendente
	0. DELTA - Mortar {Europe without Switzerland}| production | APOS, U - A1-A5		A1	A2		A3					A4	A5		Benefici mancato smaltimento		TOT				0. DELTA - Mortar {Europe without Switzerland}| production | APOS, U - A1-A5		A1	A2		A3					A4	A5		Benefici mancato smaltimento		TOT
	Categoria d'impatto	Unità	Cement, limestone 6-20% {RoW}| cement production, limestone 6-20% | Cut-off, U	T. Cemento_ Transport, freight, lorry, unspecified {RER}| market for transport, freight, lorry, unspecified | APOS, U	T. DELTA _ Transport, freight, lorry, unspecified {RER}| market for transport, freight, lorry, unspecified | APOS, U	Conveyor belt {GLO}| market for | APOS, U	Industrial machine, heavy, unspecified {RoW}| market for industrial machine, heavy, unspecified | APOS, U	Packing, cement {RoW}| processing | APOS, U	Rock crushing {RER}| processing | APOS, U	Electricity, medium voltage {IT}| market for | APOS, U	A4_ Transport, freight, lorry, unspecified {RER}| market for transport, freight, lorry, unspecified | APOS, U	A5 - Tap water {Europe without Switzerland}| market for | APOS, U	A5 - Electricity grid mix, AC, consumption mix, at consumer, 230V IT S	Benefici - Transport, freight, lorry, unspecified {RER}| market for transport, freight, lorry, unspecified | APOS, U	Benefici - Waste plastic, mixture {RoW}| treatment of waste plastic, mixture, sanitary landfill | APOS, U	Totale				Categoria d'impatto	Unità	Cement, limestone 6-20% {RoW}| cement production, limestone 6-20% | Cut-off, U	T. Cemento_ Transport, freight, lorry, unspecified {RER}| market for transport, freight, lorry, unspecified | APOS, U	T. DELTA _ Transport, freight, lorry, unspecified {RER}| market for transport, freight, lorry, unspecified | APOS, U	Conveyor belt {GLO}| market for | APOS, U	Industrial machine, heavy, unspecified {RoW}| market for industrial machine, heavy, unspecified | APOS, U	Packing, cement {RoW}| processing | APOS, U	Rock crushing {RER}| processing | APOS, U	Electricity, medium voltage {IT}| market for | APOS, U	A4_ Transport, freight, lorry, unspecified {RER}| market for transport, freight, lorry, unspecified | APOS, U	A5 - Tap water {Europe without Switzerland}| market for | APOS, U	A5 - Electricity grid mix, AC, consumption mix, at consumer, 230V IT S	Benefici - Transport, freight, lorry, unspecified {RER}| market for transport, freight, lorry, unspecified | APOS, U	Benefici - Waste plastic, mixture {RoW}| treatment of waste plastic, mixture, sanitary landfill | APOS, U	Totale
	Climate change	kg CO2 eq	0.333981	0.00357402	0	4.25953e-05	1.60247e-05	0.00759062	0.000292848	0.0137938	0.00893504	0.000104639	0.0427702	-0.00238268	-0.105548	0.30317				Climate change	kg CO2 eq	0.333981	0.00357402	0	4.25953e-05	1.60247e-05	0.00759062	0.000292848	0.0137938	0.0893504	0.000104639	0.0427702	-0.00238268	-0.105548	0.383586
	Ozone depletion	kg CFC11 eq	1.13597e-08	8.20615e-10	0	2.40923e-12	1.03759e-12	4.00509e-10	2.6624e-11	1.91019e-09	2.05154e-09	9.37867e-12	3.75595e-10	-5.47077e-10	-2.97208e-09	1.34385e-08				Ozone depletion	kg CFC11 eq	1.13597e-08	8.20615e-10	0	2.40923e-12	1.03759e-12	4.00509e-10	2.6624e-11	1.91019e-09	2.05154e-08	9.37867e-12	3.75595e-10	-5.47077e-10	-2.97208e-09	3.19023e-08
	Ionising radiation	kBq U-235 eq	0.00698221	0.000284624	0	2.43097e-06	1.09926e-06	0.000460456	0.000150154	0.0015694	0.000711561	3.50137e-05	0.00169879	-0.000189749	-0.00114176	0.0105642				Ionising radiation	kBq U-235 eq	0.00698221	0.000284624	0	2.43097e-06	1.09926e-06	0.000460456	0.000150154	0.0015694	0.00711561	3.50137e-05	0.00169879	-0.000189749	-0.00114176	0.0169683
	Photochemical ozone formation	kg NMVOC eq	0.000797007	2.27668e-05	0	1.60315e-07	7.20811e-08	2.8641e-05	6.80282e-07	2.92679e-05	5.69169e-05	3.23915e-07	5.92739e-05	-1.51779e-05	-0.000112194	0.000867739				Photochemical ozone formation	kg NMVOC eq	0.000797007	2.27668e-05	0	1.60315e-07	7.20811e-08	2.8641e-05	6.80282e-07	2.92679e-05	0.000569169	3.23915e-07	5.92739e-05	-1.51779e-05	-0.000112194	0.00137999
	Particulate matter	disease inc.	6.91278e-09	3.23241e-10	0	3.39854e-12	1.42359e-12	1.85487e-09	5.58212e-12	2.44889e-10	8.08103e-10	5.35616e-12	8.61566e-10	-2.15494e-10	-1.58724e-09	9.21848e-09				Particulate matter	disease inc.	6.91278e-09	3.23241e-10	0	3.39854e-12	1.42359e-12	1.85487e-09	5.58212e-12	2.44889e-10	8.08103e-09	5.35616e-12	8.61566e-10	-2.15494e-10	-1.58724e-09	1.64914e-08
	Human toxicity, non-cancer	CTUh	2.55769e-09	5.22336e-11	0	3.37519e-12	1.94015e-12	1.55717e-10	4.94185e-12	7.86455e-11	1.30584e-10	6.06334e-12	6.37921e-11	-3.48224e-11	-2.19512e-10	2.80065e-09				Human toxicity, non-cancer	CTUh	2.55769e-09	5.22336e-11	0	3.37519e-12	1.94015e-12	1.55717e-10	4.94185e-12	7.86455e-11	1.30584e-09	6.06334e-12	6.37921e-11	-3.48224e-11	-2.19512e-10	3.9759e-09
	Human toxicity, cancer	CTUh	6.65378e-11	1.42809e-12	0	2.5824e-13	1.0341e-13	1.46021e-11	1.64823e-13	2.78301e-12	3.57021e-12	2.3912e-13	3.71755e-12	-9.52057e-13	-6.20715e-12	8.62452e-11				Human toxicity, cancer	CTUh	6.65378e-11	1.42809e-12	0	2.5824e-13	1.0341e-13	1.46021e-11	1.64823e-13	2.78301e-12	3.57021e-11	2.3912e-13	3.71755e-12	-9.52057e-13	-6.20715e-12	1.18377e-10
	Acidification	mol H+ eq	0.000993823	2.02544e-05	0	1.87976e-07	1.26133e-07	2.91175e-05	1.55547e-06	6.39752e-05	5.06361e-05	5.77076e-07	0.000107222	-1.3503e-05	-8.75994e-05	0.00116637				Acidification	mol H+ eq	0.000993823	2.02544e-05	0	1.87976e-07	1.26133e-07	2.91175e-05	1.55547e-06	6.39752e-05	0.000506361	5.77076e-07	0.000107222	-1.3503e-05	-8.75994e-05	0.0016221
	Eutrophication, freshwater	kg P eq	4.20676e-05	2.6806e-07	0	2.32083e-08	1.44762e-08	1.77347e-06	2.74256e-07	3.56998e-06	6.70149e-07	7.31361e-08	2.02095e-09	-1.78706e-07	-1.75032e-06	4.68073e-05				Eutrophication, freshwater	kg P eq	4.20676e-05	2.6806e-07	0	2.32083e-08	1.44762e-08	1.77347e-06	2.74256e-07	3.56998e-06	6.70149e-06	7.31361e-08	2.02095e-09	-1.78706e-07	-1.75032e-06	5.28386e-05
	Eutrophication, marine	kg N eq	0.000283873	7.30762e-06	0	4.25411e-08	1.96117e-08	1.29937e-05	2.75453e-07	1.00239e-05	1.82691e-05	1.12041e-07	1.90314e-05	-4.87175e-06	-0.00192533	-0.00157825				Eutrophication, marine	kg N eq	0.000283873	7.30762e-06	0	4.25411e-08	1.96117e-08	1.29937e-05	2.75453e-07	1.00239e-05	0.000182691	1.12041e-07	1.90314e-05	-4.87175e-06	-0.00192533	-0.00141383
	Eutrophication, terrestrial	mol N eq	0.00321064	7.98747e-05	0	4.16343e-07	2.05008e-07	8.40974e-05	2.44947e-06	0.000110331	0.000199687	1.05028e-06	0.000209191	-5.32498e-05	-0.00031506	0.00352963				Eutrophication, terrestrial	mol N eq	0.00321064	7.98747e-05	0	4.16343e-07	2.05008e-07	8.40974e-05	2.44947e-06	0.000110331	0.00199687	1.05028e-06	0.000209191	-5.32498e-05	-0.00031506	0.00532681
	Ecotoxicity, freshwater	CTUe	4.60969	0.0443323	0	0.00145446	0.00105349	2.10072	0.00426773	0.2143	0.110831	0.00198274	0.168116	-0.0295549	-0.487935	6.73926				Ecotoxicity, freshwater	CTUe	4.60969	0.0443323	0	0.00145446	0.00105349	2.10072	0.00426773	0.2143	1.10831	0.00198274	0.168116	-0.0295549	-0.487935	7.73673
	Land use	Pt	1.02996	0.0628542	0	0.00112114	0.000676069	1.15493	0.0047623	0.340344	0.157136	0.00164087	0.0032731	-0.0419028	-0.578601	2.13619				Land use	Pt	1.02996	0.0628542	0	0.00112114	0.000676069	1.15493	0.0047623	0.340344	1.57136	0.00164087	0.0032731	-0.0419028	-0.578601	3.55041
	Water use	m3 depriv.	0.0155889	0.000180976	0	1.86864e-05	7.06333e-06	0.00512927	8.34229e-05	0.0100199	0.000452439	0.0125001	0.0286051	-0.00012065	-0.0097948	0.0626704				Water use	m3 depriv.	0.0155889	0.000180976	0	1.86864e-05	7.06333e-06	0.00512927	8.34229e-05	0.0100199	0.00452439	0.0125001	0.0286051	-0.00012065	-0.0097948	0.0667423
	Resource use, fossils	MJ	1.55101	0.0544854	0	0.000408843	0.000159496	0.0644715	0.00577662	0.187158	0.136213	0.00167952	0.595339	-0.0363236	-0.2303	2.33008				Resource use, fossils	MJ	1.55101	0.0544854	0	0.000408843	0.000159496	0.0644715	0.00577662	0.187158	1.36213	0.00167952	0.595339	-0.0363236	-0.2303	3.556
	Resource use, minerals and metals	kg Sb eq	2.31856e-05	8.37666e-08	0	1.5435e-09	8.13928e-10	7.3196e-08	1.28335e-09	3.94865e-08	2.09417e-07	2.98389e-09	3.73648e-09	-5.58444e-08	-1.17685e-07	2.34283e-05				Resource use, minerals and metals	kg Sb eq	2.31856e-05	8.37666e-08	0	1.5435e-09	8.13928e-10	7.3196e-08	1.28335e-09	3.94865e-08	2.09417e-06	2.98389e-09	3.73648e-09	-5.58444e-08	-1.17685e-07	2.53131e-05
	Climate change - Fossil	kg CO2 eq	0.330701	0.00357078	0	4.24758e-05	1.59886e-05	0.00417351	0.000282382	0.0125335	0.00892696	0.000102113	0.0428314	-0.00238052	-0.105485	0.295315				Climate change - Fossil	kg CO2 eq	0.330701	0.00357078	0	4.24758e-05	1.59886e-05	0.00417351	0.000282382	0.0125335	0.0892696	0.000102113	0.0428314	-0.00238052	-0.105485	0.375658
	Climate change - Biogenic	kg CO2 eq	0.00317501	1.83661e-06	0	1.25274e-08	-7.11704e-09	0.00339206	9.7275e-06	0.00124799	4.59153e-06	2.33634e-06	-6.12064e-05	-1.22441e-06	-5.74701e-05	0.00771366				Climate change - Biogenic	kg CO2 eq	0.00317501	1.83661e-06	0	1.25274e-08	-7.11704e-09	0.00339206	9.7275e-06	0.00124799	4.59153e-05	2.33634e-06	-6.12064e-05	-1.22441e-06	-5.74701e-05	0.00775498
	Climate change - Land use and LU change	kg CO2 eq	0.000105076	1.39574e-06	0	1.07024e-07	4.31495e-08	2.50512e-05	7.38199e-07	1.22948e-05	3.48936e-06	1.90093e-07	0	-9.30496e-07	-6.11337e-06	0.000141342				Climate change - Land use and LU change	kg CO2 eq	0.000105076	1.39574e-06	0	1.07024e-07	4.31495e-08	2.50512e-05	7.38199e-07	1.22948e-05	3.48936e-05	1.90093e-07	0	-9.30496e-07	-6.11337e-06	0.000172746
	Human toxicity, non-cancer - organics	CTUh	3.75683e-11	5.90864e-12	0	5.95903e-14	5.63053e-14	1.55108e-11	5.17015e-14	2.65288e-12	1.47716e-11	3.05862e-14	3.42499e-13	-3.93909e-12	-1.07067e-10	-3.40531e-11				Human toxicity, non-cancer - organics	CTUh	3.75683e-11	5.90864e-12	0	5.95903e-14	5.63053e-14	1.55108e-11	5.17015e-14	2.65288e-12	1.47716e-10	3.05862e-14	3.42499e-13	-3.93909e-12	-1.07067e-10	9.88912e-11
	Human toxicity, non-cancer - inorganics	CTUh	3.84349e-10	1.00641e-11	0	4.65776e-13	1.78073e-13	4.75308e-11	3.97272e-13	1.13768e-11	2.51602e-11	5.46717e-13	2.16605e-11	-6.70938e-12	-7.33072e-11	4.21712e-10				Human toxicity, non-cancer - inorganics	CTUh	3.84349e-10	1.00641e-11	0	4.65776e-13	1.78073e-13	4.75308e-11	3.97272e-13	1.13768e-11	2.51602e-10	5.46717e-13	2.16605e-11	-6.70938e-12	-7.33072e-11	6.48154e-10
	Human toxicity, non-cancer - metals	CTUh	2.14731e-09	3.63706e-11	0	2.85397e-12	1.70737e-12	9.31608e-11	4.51352e-12	6.60075e-11	9.09264e-11	5.49466e-12	4.1789e-11	-2.4247e-11	-1.42758e-10	2.32312e-09				Human toxicity, non-cancer - metals	CTUh	2.14731e-09	3.63706e-11	0	2.85397e-12	1.70737e-12	9.31608e-11	4.51352e-12	6.60075e-11	9.09264e-10	5.49466e-12	4.1789e-11	-2.4247e-11	-1.42758e-10	3.14146e-09
	Human toxicity, cancer - organics	CTUh	3.3895e-11	8.40716e-13	0	6.84336e-14	2.63517e-14	1.23216e-11	5.16149e-14	1.09191e-12	2.10179e-12	8.08595e-14	2.09663e-12	-5.60478e-13	-2.13486e-12	4.98796e-11				Human toxicity, cancer - organics	CTUh	3.3895e-11	8.40716e-13	0	6.84336e-14	2.63517e-14	1.23216e-11	5.16149e-14	1.09191e-12	2.10179e-11	8.08595e-14	2.09663e-12	-5.60478e-13	-2.13486e-12	6.87957e-11
	Human toxicity, cancer - inorganics	CTUh	0	7.28961e-21	0	2.18973e-22	8.35363e-23	4.02402e-20	2.3319e-21	2.52748e-20	1.8224e-20	4.53414e-22	0	-4.85974e-21	-2.80337e-20	6.1223e-20				Human toxicity, cancer - inorganics	CTUh	0	7.28961e-21	0	2.18973e-22	8.35363e-23	4.02402e-20	2.3319e-21	2.52748e-20	1.8224e-19	4.53414e-22	0	-4.85974e-21	-2.80337e-20	2.25239e-19
	Human toxicity, cancer - metals	CTUh	3.26428e-11	5.87369e-13	0	1.89807e-13	7.70585e-14	2.28048e-12	1.13209e-13	1.6911e-12	1.46842e-12	1.5826e-13	1.62092e-12	-3.91579e-13	-4.07228e-12	3.63656e-11				Human toxicity, cancer - metals	CTUh	3.26428e-11	5.87369e-13	0	1.89807e-13	7.70585e-14	2.28048e-12	1.13209e-13	1.6911e-12	1.46842e-11	1.5826e-13	1.62092e-12	-3.91579e-13	-4.07228e-12	4.95814e-11
	Ecotoxicity, freshwater - organics	CTUe	0.0413495	0.00325729	0	1.46986e-05	8.96591e-06	0.00644932	2.90202e-05	0.0022292	0.00814322	3.40852e-05	0.000426527	-0.00217153	-0.012736	0.0470343				Ecotoxicity, freshwater - organics	CTUe	0.0413495	0.00325729	0	1.46986e-05	8.96591e-06	0.00644932	2.90202e-05	0.0022292	0.0814322	3.40852e-05	0.000426527	-0.00217153	-0.012736	0.120323
	Ecotoxicity, freshwater - inorganics	CTUe	0.267384	0.0114607	0	0.00011231	8.2116e-05	0.0150168	0.000230669	0.0130356	0.0286517	0.000176803	0.13538	-0.00764047	-0.329888	0.134002				Ecotoxicity, freshwater - inorganics	CTUe	0.267384	0.0114607	0	0.00011231	8.2116e-05	0.0150168	0.000230669	0.0130356	0.286517	0.000176803	0.13538	-0.00764047	-0.329888	0.391868
	Ecotoxicity, freshwater - metals	CTUe	4.30095	0.0296143	0	0.00132745	0.000962412	2.07926	0.00400804	0.199035	0.0740357	0.00177185	0.0323089	-0.0197429	-0.145311	6.55822				Ecotoxicity, freshwater - metals	CTUe	4.30095	0.0296143	0	0.00132745	0.000962412	2.07926	0.00400804	0.199035	0.740357	0.00177185	0.0323089	-0.0197429	-0.145311	7.22454
	Calculation:	Analizza																		Calculation:	Analizza
	Results:	Valutazione dell'impatto							DELTA (SB)											Results:	Valutazione dell'impatto							DELTA (SB)
	Product:	1 l 0. DELTA - Mortar {Europe without Switzerland}| production | APOS, U - A1-A5 (del progetto						Trasporto	RIF											Product:	1 l 0. DELTA - Mortar {Europe without Switzerland}| production | APOS, U - A1-A5 (del progetto						Trasporto	RIF
	Metodo:	EN 15804 +A2 Method V1.00 / EF 3.0 normalization and weighting set						Cemento	60											Metodo:	EN 15804 +A2 Method V1.00 / EF 3.0 normalization and weighting set						Cemento	60
	Indicatore:	Caratterizzazione							-											Indicatore:	Caratterizzazione							-
	Skip categories:	Mai						DELTA	100											Skip categories:	Mai						DELTA	100
	Esclude processi di infrastrutture:	No							-											Esclude processi di infrastrutture:	No							-
	Esclude le emissioni di lungo termine:	No						Fabbrica-cantiere	50											Esclude le emissioni di lungo termine:	No						Fabbrica-cantiere	500
	Sorted on item:	Categoria d'impatto							-											Sorted on item:	Categoria d'impatto							-
	Sort order:	Ascendente																		Sort order:	Ascendente
	0. DELTA - Mortar {Europe without Switzerland}| production | APOS, U - A1-A5		A1	A2		A3					A4	A5		Benefici mancato smaltimento		TOT				0. DELTA - Mortar {Europe without Switzerland}| production | APOS, U - A1-A5		A1	A2		A3					A4	A5		Benefici mancato smaltimento		TOT
	Categoria d'impatto	Unità	Cement, limestone 6-20% {RoW}| cement production, limestone 6-20% | Cut-off, U	T. Cemento_ Transport, freight, lorry, unspecified {RER}| market for transport, freight, lorry, unspecified | APOS, U	T. DELTA _ Transport, freight, lorry, unspecified {RER}| market for transport, freight, lorry, unspecified | APOS, U	Conveyor belt {GLO}| market for | APOS, U	Industrial machine, heavy, unspecified {RoW}| market for industrial machine, heavy, unspecified | APOS, U	Packing, cement {RoW}| processing | APOS, U	Rock crushing {RER}| processing | APOS, U	Electricity, medium voltage {IT}| market for | APOS, U	A4_ Transport, freight, lorry, unspecified {RER}| market for transport, freight, lorry, unspecified | APOS, U	A5 - Tap water {Europe without Switzerland}| market for | APOS, U	A5 - Electricity grid mix, AC, consumption mix, at consumer, 230V IT S	Benefici - Transport, freight, lorry, unspecified {RER}| market for transport, freight, lorry, unspecified | APOS, U	Benefici - Waste plastic, mixture {RoW}| treatment of waste plastic, mixture, sanitary landfill | APOS, U	Totale				Categoria d'impatto	Unità	Cement, limestone 6-20% {RoW}| cement production, limestone 6-20% | Cut-off, U	T. Cemento_ Transport, freight, lorry, unspecified {RER}| market for transport, freight, lorry, unspecified | APOS, U	T. DELTA _ Transport, freight, lorry, unspecified {RER}| market for transport, freight, lorry, unspecified | APOS, U	Conveyor belt {GLO}| market for | APOS, U	Industrial machine, heavy, unspecified {RoW}| market for industrial machine, heavy, unspecified | APOS, U	Packing, cement {RoW}| processing | APOS, U	Rock crushing {RER}| processing | APOS, U	Electricity, medium voltage {IT}| market for | APOS, U	A4_ Transport, freight, lorry, unspecified {RER}| market for transport, freight, lorry, unspecified | APOS, U	A5 - Tap water {Europe without Switzerland}| market for | APOS, U	A5 - Electricity grid mix, AC, consumption mix, at consumer, 230V IT S	Benefici - Transport, freight, lorry, unspecified {RER}| market for transport, freight, lorry, unspecified | APOS, U	Benefici - Waste plastic, mixture {RoW}| treatment of waste plastic, mixture, sanitary landfill | APOS, U	Totale
	Climate change	kg CO2 eq	0.333981	0.00357402	0.0119134	4.25953e-05	1.60247e-05	0.00759062	0.000292848	0.0137938	0.00893504	0.000104639	0.0427702	-0.00238268	-0.105548	0.315084				Climate change	kg CO2 eq	0.333981	0.00357402	0.0119134	4.25953e-05	1.60247e-05	0.00759062	0.000292848	0.0137938	0.0893504	0.000104639	0.0427702	-0.00238268	-0.105548	0.395499
	Ozone depletion	kg CFC11 eq	1.13597e-08	8.20615e-10	2.73538e-09	2.40923e-12	1.03759e-12	4.00509e-10	2.6624e-11	1.91019e-09	2.05154e-09	9.37867e-12	3.75595e-10	-5.47077e-10	-2.97208e-09	1.61739e-08				Ozone depletion	kg CFC11 eq	1.13597e-08	8.20615e-10	2.73538e-09	2.40923e-12	1.03759e-12	4.00509e-10	2.6624e-11	1.91019e-09	2.05154e-08	9.37867e-12	3.75595e-10	-5.47077e-10	-2.97208e-09	3.46377e-08
	Ionising radiation	kBq U-235 eq	0.00698221	0.000284624	0.000948747	2.43097e-06	1.09926e-06	0.000460456	0.000150154	0.0015694	0.000711561	3.50137e-05	0.00169879	-0.000189749	-0.00114176	0.011513				Ionising radiation	kBq U-235 eq	0.00698221	0.000284624	0.000948747	2.43097e-06	1.09926e-06	0.000460456	0.000150154	0.0015694	0.00711561	3.50137e-05	0.00169879	-0.000189749	-0.00114176	0.017917
	Photochemical ozone formation	kg NMVOC eq	0.000797007	2.27668e-05	7.58893e-05	1.60315e-07	7.20811e-08	2.8641e-05	6.80282e-07	2.92679e-05	5.69169e-05	3.23915e-07	5.92739e-05	-1.51779e-05	-0.000112194	0.000943628				Photochemical ozone formation	kg NMVOC eq	0.000797007	2.27668e-05	7.58893e-05	1.60315e-07	7.20811e-08	2.8641e-05	6.80282e-07	2.92679e-05	0.000569169	3.23915e-07	5.92739e-05	-1.51779e-05	-0.000112194	0.00145588
	Particulate matter	disease inc.	6.91278e-09	3.23241e-10	1.07747e-09	3.39854e-12	1.42359e-12	1.85487e-09	5.58212e-12	2.44889e-10	8.08103e-10	5.35616e-12	8.61566e-10	-2.15494e-10	-1.58724e-09	1.0296e-08				Particulate matter	disease inc.	6.91278e-09	3.23241e-10	1.07747e-09	3.39854e-12	1.42359e-12	1.85487e-09	5.58212e-12	2.44889e-10	8.08103e-09	5.35616e-12	8.61566e-10	-2.15494e-10	-1.58724e-09	1.75689e-08
	Human toxicity, non-cancer	CTUh	2.55769e-09	5.22336e-11	1.74112e-10	3.37519e-12	1.94015e-12	1.55717e-10	4.94185e-12	7.86455e-11	1.30584e-10	6.06334e-12	6.37921e-11	-3.48224e-11	-2.19512e-10	2.97476e-09				Human toxicity, non-cancer	CTUh	2.55769e-09	5.22336e-11	1.74112e-10	3.37519e-12	1.94015e-12	1.55717e-10	4.94185e-12	7.86455e-11	1.30584e-09	6.06334e-12	6.37921e-11	-3.48224e-11	-2.19512e-10	4.15002e-09
	Human toxicity, cancer	CTUh	6.65378e-11	1.42809e-12	4.76028e-12	2.5824e-13	1.0341e-13	1.46021e-11	1.64823e-13	2.78301e-12	3.57021e-12	2.3912e-13	3.71755e-12	-9.52057e-13	-6.20715e-12	9.10055e-11				Human toxicity, cancer	CTUh	6.65378e-11	1.42809e-12	4.76028e-12	2.5824e-13	1.0341e-13	1.46021e-11	1.64823e-13	2.78301e-12	3.57021e-11	2.3912e-13	3.71755e-12	-9.52057e-13	-6.20715e-12	1.23137e-10
	Acidification	mol H+ eq	0.000993823	2.02544e-05	6.75148e-05	1.87976e-07	1.26133e-07	2.91175e-05	1.55547e-06	6.39752e-05	5.06361e-05	5.77076e-07	0.000107222	-1.3503e-05	-8.75994e-05	0.00123389				Acidification	mol H+ eq	0.000993823	2.02544e-05	6.75148e-05	1.87976e-07	1.26133e-07	2.91175e-05	1.55547e-06	6.39752e-05	0.000506361	5.77076e-07	0.000107222	-1.3503e-05	-8.75994e-05	0.00168961
	Eutrophication, freshwater	kg P eq	4.20676e-05	2.6806e-07	8.93532e-07	2.32083e-08	1.44762e-08	1.77347e-06	2.74256e-07	3.56998e-06	6.70149e-07	7.31361e-08	2.02095e-09	-1.78706e-07	-1.75032e-06	4.77008e-05				Eutrophication, freshwater	kg P eq	4.20676e-05	2.6806e-07	8.93532e-07	2.32083e-08	1.44762e-08	1.77347e-06	2.74256e-07	3.56998e-06	6.70149e-06	7.31361e-08	2.02095e-09	-1.78706e-07	-1.75032e-06	5.37322e-05
	Eutrophication, marine	kg N eq	0.000283873	7.30762e-06	2.43587e-05	4.25411e-08	1.96117e-08	1.29937e-05	2.75453e-07	1.00239e-05	1.82691e-05	1.12041e-07	1.90314e-05	-4.87175e-06	-0.00192533	-0.00155389				Eutrophication, marine	kg N eq	0.000283873	7.30762e-06	2.43587e-05	4.25411e-08	1.96117e-08	1.29937e-05	2.75453e-07	1.00239e-05	0.000182691	1.12041e-07	1.90314e-05	-4.87175e-06	-0.00192533	-0.00138947
	Eutrophication, terrestrial	mol N eq	0.00321064	7.98747e-05	0.000266249	4.16343e-07	2.05008e-07	8.40974e-05	2.44947e-06	0.000110331	0.000199687	1.05028e-06	0.000209191	-5.32498e-05	-0.00031506	0.00379588				Eutrophication, terrestrial	mol N eq	0.00321064	7.98747e-05	0.000266249	4.16343e-07	2.05008e-07	8.40974e-05	2.44947e-06	0.000110331	0.00199687	1.05028e-06	0.000209191	-5.32498e-05	-0.00031506	0.00559306
	Ecotoxicity, freshwater	CTUe	4.60969	0.0443323	0.147774	0.00145446	0.00105349	2.10072	0.00426773	0.2143	0.110831	0.00198274	0.168116	-0.0295549	-0.487935	6.88703				Ecotoxicity, freshwater	CTUe	4.60969	0.0443323	0.147774	0.00145446	0.00105349	2.10072	0.00426773	0.2143	1.10831	0.00198274	0.168116	-0.0295549	-0.487935	7.88451
	Land use	Pt	1.02996	0.0628542	0.209514	0.00112114	0.000676069	1.15493	0.0047623	0.340344	0.157136	0.00164087	0.0032731	-0.0419028	-0.578601	2.3457				Land use	Pt	1.02996	0.0628542	0.209514	0.00112114	0.000676069	1.15493	0.0047623	0.340344	1.57136	0.00164087	0.0032731	-0.0419028	-0.578601	3.75992
	Water use	m3 depriv.	0.0155889	0.000180976	0.000603252	1.86864e-05	7.06333e-06	0.00512927	8.34229e-05	0.0100199	0.000452439	0.0125001	0.0286051	-0.00012065	-0.0097948	0.0632737				Water use	m3 depriv.	0.0155889	0.000180976	0.000603252	1.86864e-05	7.06333e-06	0.00512927	8.34229e-05	0.0100199	0.00452439	0.0125001	0.0286051	-0.00012065	-0.0097948	0.0673456
	Resource use, fossils	MJ	1.55101	0.0544854	0.181618	0.000408843	0.000159496	0.0644715	0.00577662	0.187158	0.136213	0.00167952	0.595339	-0.0363236	-0.2303	2.5117				Resource use, fossils	MJ	1.55101	0.0544854	0.181618	0.000408843	0.000159496	0.0644715	0.00577662	0.187158	1.36213	0.00167952	0.595339	-0.0363236	-0.2303	3.73762
	Resource use, minerals and metals	kg Sb eq	2.31856e-05	8.37666e-08	2.79222e-07	1.5435e-09	8.13928e-10	7.3196e-08	1.28335e-09	3.94865e-08	2.09417e-07	2.98389e-09	3.73648e-09	-5.58444e-08	-1.17685e-07	2.37076e-05				Resource use, minerals and metals	kg Sb eq	2.31856e-05	8.37666e-08	2.79222e-07	1.5435e-09	8.13928e-10	7.3196e-08	1.28335e-09	3.94865e-08	2.09417e-06	2.98389e-09	3.73648e-09	-5.58444e-08	-1.17685e-07	2.55923e-05
	Climate change - Fossil	kg CO2 eq	0.330701	0.00357078	0.0119026	4.24758e-05	1.59886e-05	0.00417351	0.000282382	0.0125335	0.00892696	0.000102113	0.0428314	-0.00238052	-0.105485	0.307218				Climate change - Fossil	kg CO2 eq	0.330701	0.00357078	0.0119026	4.24758e-05	1.59886e-05	0.00417351	0.000282382	0.0125335	0.0892696	0.000102113	0.0428314	-0.00238052	-0.105485	0.38756
	Climate change - Biogenic	kg CO2 eq	0.00317501	1.83661e-06	6.12204e-06	1.25274e-08	-7.11704e-09	0.00339206	9.7275e-06	0.00124799	4.59153e-06	2.33634e-06	-6.12064e-05	-1.22441e-06	-5.74701e-05	0.00771978				Climate change - Biogenic	kg CO2 eq	0.00317501	1.83661e-06	6.12204e-06	1.25274e-08	-7.11704e-09	0.00339206	9.7275e-06	0.00124799	4.59153e-05	2.33634e-06	-6.12064e-05	-1.22441e-06	-5.74701e-05	0.0077611
	Climate change - Land use and LU change	kg CO2 eq	0.000105076	1.39574e-06	4.65248e-06	1.07024e-07	4.31495e-08	2.50512e-05	7.38199e-07	1.22948e-05	3.48936e-06	1.90093e-07	0	-9.30496e-07	-6.11337e-06	0.000145994				Climate change - Land use and LU change	kg CO2 eq	0.000105076	1.39574e-06	4.65248e-06	1.07024e-07	4.31495e-08	2.50512e-05	7.38199e-07	1.22948e-05	3.48936e-05	1.90093e-07	0	-9.30496e-07	-6.11337e-06	0.000177398
	Human toxicity, non-cancer - organics	CTUh	3.75683e-11	5.90864e-12	1.96955e-11	5.95903e-14	5.63053e-14	1.55108e-11	5.17015e-14	2.65288e-12	1.47716e-11	3.05862e-14	3.42499e-13	-3.93909e-12	-1.07067e-10	-1.43576e-11				Human toxicity, non-cancer - organics	CTUh	3.75683e-11	5.90864e-12	1.96955e-11	5.95903e-14	5.63053e-14	1.55108e-11	5.17015e-14	2.65288e-12	1.47716e-10	3.05862e-14	3.42499e-13	-3.93909e-12	-1.07067e-10	1.18587e-10
	Human toxicity, non-cancer - inorganics	CTUh	3.84349e-10	1.00641e-11	3.35469e-11	4.65776e-13	1.78073e-13	4.75308e-11	3.97272e-13	1.13768e-11	2.51602e-11	5.46717e-13	2.16605e-11	-6.70938e-12	-7.33072e-11	4.55259e-10				Human toxicity, non-cancer - inorganics	CTUh	3.84349e-10	1.00641e-11	3.35469e-11	4.65776e-13	1.78073e-13	4.75308e-11	3.97272e-13	1.13768e-11	2.51602e-10	5.46717e-13	2.16605e-11	-6.70938e-12	-7.33072e-11	6.81701e-10
	Human toxicity, non-cancer - metals	CTUh	2.14731e-09	3.63706e-11	1.21235e-10	2.85397e-12	1.70737e-12	9.31608e-11	4.51352e-12	6.60075e-11	9.09264e-11	5.49466e-12	4.1789e-11	-2.4247e-11	-1.42758e-10	2.44436e-09				Human toxicity, non-cancer - metals	CTUh	2.14731e-09	3.63706e-11	1.21235e-10	2.85397e-12	1.70737e-12	9.31608e-11	4.51352e-12	6.60075e-11	9.09264e-10	5.49466e-12	4.1789e-11	-2.4247e-11	-1.42758e-10	3.2627e-09
	Human toxicity, cancer - organics	CTUh	3.3895e-11	8.40716e-13	2.80239e-12	6.84336e-14	2.63517e-14	1.23216e-11	5.16149e-14	1.09191e-12	2.10179e-12	8.08595e-14	2.09663e-12	-5.60478e-13	-2.13486e-12	5.2682e-11				Human toxicity, cancer - organics	CTUh	3.3895e-11	8.40716e-13	2.80239e-12	6.84336e-14	2.63517e-14	1.23216e-11	5.16149e-14	1.09191e-12	2.10179e-11	8.08595e-14	2.09663e-12	-5.60478e-13	-2.13486e-12	7.15981e-11
	Human toxicity, cancer - inorganics	CTUh	0	7.28961e-21	2.42987e-20	2.18973e-22	8.35363e-23	4.02402e-20	2.3319e-21	2.52748e-20	1.8224e-20	4.53414e-22	0	-4.85974e-21	-2.80337e-20	8.55217e-20				Human toxicity, cancer - inorganics	CTUh	0	7.28961e-21	2.42987e-20	2.18973e-22	8.35363e-23	4.02402e-20	2.3319e-21	2.52748e-20	1.8224e-19	4.53414e-22	0	-4.85974e-21	-2.80337e-20	2.49538e-19
	Human toxicity, cancer - metals	CTUh	3.26428e-11	5.87369e-13	1.9579e-12	1.89807e-13	7.70585e-14	2.28048e-12	1.13209e-13	1.6911e-12	1.46842e-12	1.5826e-13	1.62092e-12	-3.91579e-13	-4.07228e-12	3.83235e-11				Human toxicity, cancer - metals	CTUh	3.26428e-11	5.87369e-13	1.9579e-12	1.89807e-13	7.70585e-14	2.28048e-12	1.13209e-13	1.6911e-12	1.46842e-11	1.5826e-13	1.62092e-12	-3.91579e-13	-4.07228e-12	5.15393e-11
	Ecotoxicity, freshwater - organics	CTUe	0.0413495	0.00325729	0.0108576	1.46986e-05	8.96591e-06	0.00644932	2.90202e-05	0.0022292	0.00814322	3.40852e-05	0.000426527	-0.00217153	-0.012736	0.0578919				Ecotoxicity, freshwater - organics	CTUe	0.0413495	0.00325729	0.0108576	1.46986e-05	8.96591e-06	0.00644932	2.90202e-05	0.0022292	0.0814322	3.40852e-05	0.000426527	-0.00217153	-0.012736	0.131181
	Ecotoxicity, freshwater - inorganics	CTUe	0.267384	0.0114607	0.0382023	0.00011231	8.2116e-05	0.0150168	0.000230669	0.0130356	0.0286517	0.000176803	0.13538	-0.00764047	-0.329888	0.172205				Ecotoxicity, freshwater - inorganics	CTUe	0.267384	0.0114607	0.0382023	0.00011231	8.2116e-05	0.0150168	0.000230669	0.0130356	0.286517	0.000176803	0.13538	-0.00764047	-0.329888	0.43007
	Ecotoxicity, freshwater - metals	CTUe	4.30095	0.0296143	0.0987143	0.00132745	0.000962412	2.07926	0.00400804	0.199035	0.0740357	0.00177185	0.0323089	-0.0197429	-0.145311	6.65693				Ecotoxicity, freshwater - metals	CTUe	4.30095	0.0296143	0.0987143	0.00132745	0.000962412	2.07926	0.00400804	0.199035	0.740357	0.00177185	0.0323089	-0.0197429	-0.145311	7.32326
	Calculation:	Analizza																		Calculation:	Analizza
	Results:	Valutazione dell'impatto							DELTA (SB)											Results:	Valutazione dell'impatto							DELTA (SB)
	Product:	1 l 0. DELTA - Mortar {Europe without Switzerland}| production | APOS, U - A1-A5 (del progetto						Trasporto	RIF											Product:	1 l 0. DELTA - Mortar {Europe without Switzerland}| production | APOS, U - A1-A5 (del progetto						Trasporto	RIF
	Metodo:	EN 15804 +A2 Method V1.00 / EF 3.0 normalization and weighting set						Cemento	60											Metodo:	EN 15804 +A2 Method V1.00 / EF 3.0 normalization and weighting set						Cemento	60
	Indicatore:	Caratterizzazione							-											Indicatore:	Caratterizzazione							-
	Skip categories:	Mai						DELTA	200											Skip categories:	Mai						DELTA	200
	Esclude processi di infrastrutture:	No							-											Esclude processi di infrastrutture:	No							-
	Esclude le emissioni di lungo termine:	No						Fabbrica-cantiere	50											Esclude le emissioni di lungo termine:	No						Fabbrica-cantiere	500
	Sorted on item:	Categoria d'impatto							-											Sorted on item:	Categoria d'impatto							-
	Sort order:	Ascendente																		Sort order:	Ascendente
	0. DELTA - Mortar {Europe without Switzerland}| production | APOS, U - A1-A5		A1	A2		A3					A4	A5		Benefici mancato smaltimento		TOT				0. DELTA - Mortar {Europe without Switzerland}| production | APOS, U - A1-A5		A1	A2		A3					A4	A5		Benefici mancato smaltimento		TOT
	Categoria d'impatto	Unità	Cement, limestone 6-20% {RoW}| cement production, limestone 6-20% | Cut-off, U	T. Cemento_ Transport, freight, lorry, unspecified {RER}| market for transport, freight, lorry, unspecified | APOS, U	T. DELTA _ Transport, freight, lorry, unspecified {RER}| market for transport, freight, lorry, unspecified | APOS, U	Conveyor belt {GLO}| market for | APOS, U	Industrial machine, heavy, unspecified {RoW}| market for industrial machine, heavy, unspecified | APOS, U	Packing, cement {RoW}| processing | APOS, U	Rock crushing {RER}| processing | APOS, U	Electricity, medium voltage {IT}| market for | APOS, U	A4_ Transport, freight, lorry, unspecified {RER}| market for transport, freight, lorry, unspecified | APOS, U	A5 - Tap water {Europe without Switzerland}| market for | APOS, U	A5 - Electricity grid mix, AC, consumption mix, at consumer, 230V IT S	Benefici - Transport, freight, lorry, unspecified {RER}| market for transport, freight, lorry, unspecified | APOS, U	Benefici - Waste plastic, mixture {RoW}| treatment of waste plastic, mixture, sanitary landfill | APOS, U	Totale				Categoria d'impatto	Unità	Cement, limestone 6-20% {RoW}| cement production, limestone 6-20% | Cut-off, U	T. Cemento_ Transport, freight, lorry, unspecified {RER}| market for transport, freight, lorry, unspecified | APOS, U	T. DELTA _ Transport, freight, lorry, unspecified {RER}| market for transport, freight, lorry, unspecified | APOS, U	Conveyor belt {GLO}| market for | APOS, U	Industrial machine, heavy, unspecified {RoW}| market for industrial machine, heavy, unspecified | APOS, U	Packing, cement {RoW}| processing | APOS, U	Rock crushing {RER}| processing | APOS, U	Electricity, medium voltage {IT}| market for | APOS, U	A4_ Transport, freight, lorry, unspecified {RER}| market for transport, freight, lorry, unspecified | APOS, U	A5 - Tap water {Europe without Switzerland}| market for | APOS, U	A5 - Electricity grid mix, AC, consumption mix, at consumer, 230V IT S	Benefici - Transport, freight, lorry, unspecified {RER}| market for transport, freight, lorry, unspecified | APOS, U	Benefici - Waste plastic, mixture {RoW}| treatment of waste plastic, mixture, sanitary landfill | APOS, U	Totale
	Climate change	kg CO2 eq	0.333981	0.00357402	0.0238268	4.25953e-05	1.60247e-05	0.00759062	0.000292848	0.0137938	0.00893504	0.000104639	0.0427702	-0.00238268	-0.105548	0.326997				Climate change	kg CO2 eq	0.333981	0.00357402	0.0238268	4.25953e-05	1.60247e-05	0.00759062	0.000292848	0.0137938	0.0893504	0.000104639	0.0427702	-0.00238268	-0.105548	0.407412
	Ozone depletion	kg CFC11 eq	1.13597e-08	8.20615e-10	5.47077e-09	2.40923e-12	1.03759e-12	4.00509e-10	2.6624e-11	1.91019e-09	2.05154e-09	9.37867e-12	3.75595e-10	-5.47077e-10	-2.97208e-09	1.89092e-08				Ozone depletion	kg CFC11 eq	1.13597e-08	8.20615e-10	5.47077e-09	2.40923e-12	1.03759e-12	4.00509e-10	2.6624e-11	1.91019e-09	2.05154e-08	9.37867e-12	3.75595e-10	-5.47077e-10	-2.97208e-09	3.73731e-08
	Ionising radiation	kBq U-235 eq	0.00698221	0.000284624	0.00189749	2.43097e-06	1.09926e-06	0.000460456	0.000150154	0.0015694	0.000711561	3.50137e-05	0.00169879	-0.000189749	-0.00114176	0.0124617				Ionising radiation	kBq U-235 eq	0.00698221	0.000284624	0.00189749	2.43097e-06	1.09926e-06	0.000460456	0.000150154	0.0015694	0.00711561	3.50137e-05	0.00169879	-0.000189749	-0.00114176	0.0188658
	Photochemical ozone formation	kg NMVOC eq	0.000797007	2.27668e-05	0.000151779	1.60315e-07	7.20811e-08	2.8641e-05	6.80282e-07	2.92679e-05	5.69169e-05	3.23915e-07	5.92739e-05	-1.51779e-05	-0.000112194	0.00101952				Photochemical ozone formation	kg NMVOC eq	0.000797007	2.27668e-05	0.000151779	1.60315e-07	7.20811e-08	2.8641e-05	6.80282e-07	2.92679e-05	0.000569169	3.23915e-07	5.92739e-05	-1.51779e-05	-0.000112194	0.00153177
	Particulate matter	disease inc.	6.91278e-09	3.23241e-10	2.15494e-09	3.39854e-12	1.42359e-12	1.85487e-09	5.58212e-12	2.44889e-10	8.08103e-10	5.35616e-12	8.61566e-10	-2.15494e-10	-1.58724e-09	1.13734e-08				Particulate matter	disease inc.	6.91278e-09	3.23241e-10	2.15494e-09	3.39854e-12	1.42359e-12	1.85487e-09	5.58212e-12	2.44889e-10	8.08103e-09	5.35616e-12	8.61566e-10	-2.15494e-10	-1.58724e-09	1.86464e-08
	Human toxicity, non-cancer	CTUh	2.55769e-09	5.22336e-11	3.48224e-10	3.37519e-12	1.94015e-12	1.55717e-10	4.94185e-12	7.86455e-11	1.30584e-10	6.06334e-12	6.37921e-11	-3.48224e-11	-2.19512e-10	3.14887e-09				Human toxicity, non-cancer	CTUh	2.55769e-09	5.22336e-11	3.48224e-10	3.37519e-12	1.94015e-12	1.55717e-10	4.94185e-12	7.86455e-11	1.30584e-09	6.06334e-12	6.37921e-11	-3.48224e-11	-2.19512e-10	4.32413e-09
	Human toxicity, cancer	CTUh	6.65378e-11	1.42809e-12	9.52057e-12	2.5824e-13	1.0341e-13	1.46021e-11	1.64823e-13	2.78301e-12	3.57021e-12	2.3912e-13	3.71755e-12	-9.52057e-13	-6.20715e-12	9.57657e-11				Human toxicity, cancer	CTUh	6.65378e-11	1.42809e-12	9.52057e-12	2.5824e-13	1.0341e-13	1.46021e-11	1.64823e-13	2.78301e-12	3.57021e-11	2.3912e-13	3.71755e-12	-9.52057e-13	-6.20715e-12	1.27898e-10
	Acidification	mol H+ eq	0.000993823	2.02544e-05	0.00013503	1.87976e-07	1.26133e-07	2.91175e-05	1.55547e-06	6.39752e-05	5.06361e-05	5.77076e-07	0.000107222	-1.3503e-05	-8.75994e-05	0.0013014				Acidification	mol H+ eq	0.000993823	2.02544e-05	0.00013503	1.87976e-07	1.26133e-07	2.91175e-05	1.55547e-06	6.39752e-05	0.000506361	5.77076e-07	0.000107222	-1.3503e-05	-8.75994e-05	0.00175713
	Eutrophication, freshwater	kg P eq	4.20676e-05	2.6806e-07	1.78706e-06	2.32083e-08	1.44762e-08	1.77347e-06	2.74256e-07	3.56998e-06	6.70149e-07	7.31361e-08	2.02095e-09	-1.78706e-07	-1.75032e-06	4.85944e-05				Eutrophication, freshwater	kg P eq	4.20676e-05	2.6806e-07	1.78706e-06	2.32083e-08	1.44762e-08	1.77347e-06	2.74256e-07	3.56998e-06	6.70149e-06	7.31361e-08	2.02095e-09	-1.78706e-07	-1.75032e-06	5.46257e-05
	Eutrophication, marine	kg N eq	0.000283873	7.30762e-06	4.87175e-05	4.25411e-08	1.96117e-08	1.29937e-05	2.75453e-07	1.00239e-05	1.82691e-05	1.12041e-07	1.90314e-05	-4.87175e-06	-0.00192533	-0.00152954				Eutrophication, marine	kg N eq	0.000283873	7.30762e-06	4.87175e-05	4.25411e-08	1.96117e-08	1.29937e-05	2.75453e-07	1.00239e-05	0.000182691	1.12041e-07	1.90314e-05	-4.87175e-06	-0.00192533	-0.00136511
	Eutrophication, terrestrial	mol N eq	0.00321064	7.98747e-05	0.000532498	4.16343e-07	2.05008e-07	8.40974e-05	2.44947e-06	0.000110331	0.000199687	1.05028e-06	0.000209191	-5.32498e-05	-0.00031506	0.00406213				Eutrophication, terrestrial	mol N eq	0.00321064	7.98747e-05	0.000532498	4.16343e-07	2.05008e-07	8.40974e-05	2.44947e-06	0.000110331	0.00199687	1.05028e-06	0.000209191	-5.32498e-05	-0.00031506	0.00585931
	Ecotoxicity, freshwater	CTUe	4.60969	0.0443323	0.295548	0.00145446	0.00105349	2.10072	0.00426773	0.2143	0.110831	0.00198274	0.168116	-0.0295549	-0.487935	7.03481				Ecotoxicity, freshwater	CTUe	4.60969	0.0443323	0.295548	0.00145446	0.00105349	2.10072	0.00426773	0.2143	1.10831	0.00198274	0.168116	-0.0295549	-0.487935	8.03228
	Land use	Pt	1.02996	0.0628542	0.419028	0.00112114	0.000676069	1.15493	0.0047623	0.340344	0.157136	0.00164087	0.0032731	-0.0419028	-0.578601	2.55521				Land use	Pt	1.02996	0.0628542	0.419028	0.00112114	0.000676069	1.15493	0.0047623	0.340344	1.57136	0.00164087	0.0032731	-0.0419028	-0.578601	3.96943
	Water use	m3 depriv.	0.0155889	0.000180976	0.0012065	1.86864e-05	7.06333e-06	0.00512927	8.34229e-05	0.0100199	0.000452439	0.0125001	0.0286051	-0.00012065	-0.0097948	0.0638769				Water use	m3 depriv.	0.0155889	0.000180976	0.0012065	1.86864e-05	7.06333e-06	0.00512927	8.34229e-05	0.0100199	0.00452439	0.0125001	0.0286051	-0.00012065	-0.0097948	0.0679489
	Resource use, fossils	MJ	1.55101	0.0544854	0.363236	0.000408843	0.000159496	0.0644715	0.00577662	0.187158	0.136213	0.00167952	0.595339	-0.0363236	-0.2303	2.69332				Resource use, fossils	MJ	1.55101	0.0544854	0.363236	0.000408843	0.000159496	0.0644715	0.00577662	0.187158	1.36213	0.00167952	0.595339	-0.0363236	-0.2303	3.91924
	Resource use, minerals and metals	kg Sb eq	2.31856e-05	8.37666e-08	5.58444e-07	1.5435e-09	8.13928e-10	7.3196e-08	1.28335e-09	3.94865e-08	2.09417e-07	2.98389e-09	3.73648e-09	-5.58444e-08	-1.17685e-07	2.39868e-05				Resource use, minerals and metals	kg Sb eq	2.31856e-05	8.37666e-08	5.58444e-07	1.5435e-09	8.13928e-10	7.3196e-08	1.28335e-09	3.94865e-08	2.09417e-06	2.98389e-09	3.73648e-09	-5.58444e-08	-1.17685e-07	2.58715e-05
	Climate change - Fossil	kg CO2 eq	0.330701	0.00357078	0.0238052	4.24758e-05	1.59886e-05	0.00417351	0.000282382	0.0125335	0.00892696	0.000102113	0.0428314	-0.00238052	-0.105485	0.31912				Climate change - Fossil	kg CO2 eq	0.330701	0.00357078	0.0238052	4.24758e-05	1.59886e-05	0.00417351	0.000282382	0.0125335	0.0892696	0.000102113	0.0428314	-0.00238052	-0.105485	0.399463
	Climate change - Biogenic	kg CO2 eq	0.00317501	1.83661e-06	1.22441e-05	1.25274e-08	-7.11704e-09	0.00339206	9.7275e-06	0.00124799	4.59153e-06	2.33634e-06	-6.12064e-05	-1.22441e-06	-5.74701e-05	0.0077259				Climate change - Biogenic	kg CO2 eq	0.00317501	1.83661e-06	1.22441e-05	1.25274e-08	-7.11704e-09	0.00339206	9.7275e-06	0.00124799	4.59153e-05	2.33634e-06	-6.12064e-05	-1.22441e-06	-5.74701e-05	0.00776722
	Climate change - Land use and LU change	kg CO2 eq	0.000105076	1.39574e-06	9.30496e-06	1.07024e-07	4.31495e-08	2.50512e-05	7.38199e-07	1.22948e-05	3.48936e-06	1.90093e-07	0	-9.30496e-07	-6.11337e-06	0.000150647				Climate change - Land use and LU change	kg CO2 eq	0.000105076	1.39574e-06	9.30496e-06	1.07024e-07	4.31495e-08	2.50512e-05	7.38199e-07	1.22948e-05	3.48936e-05	1.90093e-07	0	-9.30496e-07	-6.11337e-06	0.000182051
	Human toxicity, non-cancer - organics	CTUh	3.75683e-11	5.90864e-12	3.93909e-11	5.95903e-14	5.63053e-14	1.55108e-11	5.17015e-14	2.65288e-12	1.47716e-11	3.05862e-14	3.42499e-13	-3.93909e-12	-1.07067e-10	5.33784e-12				Human toxicity, non-cancer - organics	CTUh	3.75683e-11	5.90864e-12	3.93909e-11	5.95903e-14	5.63053e-14	1.55108e-11	5.17015e-14	2.65288e-12	1.47716e-10	3.05862e-14	3.42499e-13	-3.93909e-12	-1.07067e-10	1.38282e-10
	Human toxicity, non-cancer - inorganics	CTUh	3.84349e-10	1.00641e-11	6.70938e-11	4.65776e-13	1.78073e-13	4.75308e-11	3.97272e-13	1.13768e-11	2.51602e-11	5.46717e-13	2.16605e-11	-6.70938e-12	-7.33072e-11	4.88806e-10				Human toxicity, non-cancer - inorganics	CTUh	3.84349e-10	1.00641e-11	6.70938e-11	4.65776e-13	1.78073e-13	4.75308e-11	3.97272e-13	1.13768e-11	2.51602e-10	5.46717e-13	2.16605e-11	-6.70938e-12	-7.33072e-11	7.15248e-10
	Human toxicity, non-cancer - metals	CTUh	2.14731e-09	3.63706e-11	2.4247e-10	2.85397e-12	1.70737e-12	9.31608e-11	4.51352e-12	6.60075e-11	9.09264e-11	5.49466e-12	4.1789e-11	-2.4247e-11	-1.42758e-10	2.5656e-09				Human toxicity, non-cancer - metals	CTUh	2.14731e-09	3.63706e-11	2.4247e-10	2.85397e-12	1.70737e-12	9.31608e-11	4.51352e-12	6.60075e-11	9.09264e-10	5.49466e-12	4.1789e-11	-2.4247e-11	-1.42758e-10	3.38393e-09
	Human toxicity, cancer - organics	CTUh	3.3895e-11	8.40716e-13	5.60478e-12	6.84336e-14	2.63517e-14	1.23216e-11	5.16149e-14	1.09191e-12	2.10179e-12	8.08595e-14	2.09663e-12	-5.60478e-13	-2.13486e-12	5.54844e-11				Human toxicity, cancer - organics	CTUh	3.3895e-11	8.40716e-13	5.60478e-12	6.84336e-14	2.63517e-14	1.23216e-11	5.16149e-14	1.09191e-12	2.10179e-11	8.08595e-14	2.09663e-12	-5.60478e-13	-2.13486e-12	7.44005e-11
	Human toxicity, cancer - inorganics	CTUh	0	7.28961e-21	4.85974e-20	2.18973e-22	8.35363e-23	4.02402e-20	2.3319e-21	2.52748e-20	1.8224e-20	4.53414e-22	0	-4.85974e-21	-2.80337e-20	1.0982e-19				Human toxicity, cancer - inorganics	CTUh	0	7.28961e-21	4.85974e-20	2.18973e-22	8.35363e-23	4.02402e-20	2.3319e-21	2.52748e-20	1.8224e-19	4.53414e-22	0	-4.85974e-21	-2.80337e-20	2.73837e-19
	Human toxicity, cancer - metals	CTUh	3.26428e-11	5.87369e-13	3.91579e-12	1.89807e-13	7.70585e-14	2.28048e-12	1.13209e-13	1.6911e-12	1.46842e-12	1.5826e-13	1.62092e-12	-3.91579e-13	-4.07228e-12	4.02814e-11				Human toxicity, cancer - metals	CTUh	3.26428e-11	5.87369e-13	3.91579e-12	1.89807e-13	7.70585e-14	2.28048e-12	1.13209e-13	1.6911e-12	1.46842e-11	1.5826e-13	1.62092e-12	-3.91579e-13	-4.07228e-12	5.34972e-11
	Ecotoxicity, freshwater - organics	CTUe	0.0413495	0.00325729	0.0217153	1.46986e-05	8.96591e-06	0.00644932	2.90202e-05	0.0022292	0.00814322	3.40852e-05	0.000426527	-0.00217153	-0.012736	0.0687495				Ecotoxicity, freshwater - organics	CTUe	0.0413495	0.00325729	0.0217153	1.46986e-05	8.96591e-06	0.00644932	2.90202e-05	0.0022292	0.0814322	3.40852e-05	0.000426527	-0.00217153	-0.012736	0.142039
	Ecotoxicity, freshwater - inorganics	CTUe	0.267384	0.0114607	0.0764047	0.00011231	8.2116e-05	0.0150168	0.000230669	0.0130356	0.0286517	0.000176803	0.13538	-0.00764047	-0.329888	0.210407				Ecotoxicity, freshwater - inorganics	CTUe	0.267384	0.0114607	0.0764047	0.00011231	8.2116e-05	0.0150168	0.000230669	0.0130356	0.286517	0.000176803	0.13538	-0.00764047	-0.329888	0.468273
	Ecotoxicity, freshwater - metals	CTUe	4.30095	0.0296143	0.197429	0.00132745	0.000962412	2.07926	0.00400804	0.199035	0.0740357	0.00177185	0.0323089	-0.0197429	-0.145311	6.75565				Ecotoxicity, freshwater - metals	CTUe	4.30095	0.0296143	0.197429	0.00132745	0.000962412	2.07926	0.00400804	0.199035	0.740357	0.00177185	0.0323089	-0.0197429	-0.145311	7.42197
	Calculation:	Analizza																		Calculation:	Analizza
	Results:	Valutazione dell'impatto							DELTA (SB)											Results:	Valutazione dell'impatto							DELTA (SB)
	Product:	1 l 0. DELTA - Mortar {Europe without Switzerland}| production | APOS, U - A1-A5 (del progetto						Trasporto	RIF											Product:	1 l 0. DELTA - Mortar {Europe without Switzerland}| production | APOS, U - A1-A5 (del progetto						Trasporto	RIF
	Metodo:	EN 15804 +A2 Method V1.00 / EF 3.0 normalization and weighting set						Cemento	60											Metodo:	EN 15804 +A2 Method V1.00 / EF 3.0 normalization and weighting set						Cemento	60
	Indicatore:	Caratterizzazione							-											Indicatore:	Caratterizzazione							-
	Skip categories:	Mai						DELTA	300											Skip categories:	Mai						DELTA	300
	Esclude processi di infrastrutture:	No							-											Esclude processi di infrastrutture:	No							-
	Esclude le emissioni di lungo termine:	No						Fabbrica-cantiere	50											Esclude le emissioni di lungo termine:	No						Fabbrica-cantiere	500
	Sorted on item:	Categoria d'impatto							-											Sorted on item:	Categoria d'impatto							-
	Sort order:	Ascendente																		Sort order:	Ascendente
	0. DELTA - Mortar {Europe without Switzerland}| production | APOS, U - A1-A5		A1	A2		A3					A4	A5		Benefici mancato smaltimento		TOT				0. DELTA - Mortar {Europe without Switzerland}| production | APOS, U - A1-A5		A1	A2		A3					A4	A5		Benefici mancato smaltimento		TOT
	Categoria d'impatto	Unità	Cement, limestone 6-20% {RoW}| cement production, limestone 6-20% | Cut-off, U	T. Cemento_ Transport, freight, lorry, unspecified {RER}| market for transport, freight, lorry, unspecified | APOS, U	T. DELTA _ Transport, freight, lorry, unspecified {RER}| market for transport, freight, lorry, unspecified | APOS, U	Conveyor belt {GLO}| market for | APOS, U	Industrial machine, heavy, unspecified {RoW}| market for industrial machine, heavy, unspecified | APOS, U	Packing, cement {RoW}| processing | APOS, U	Rock crushing {RER}| processing | APOS, U	Electricity, medium voltage {IT}| market for | APOS, U	A4_ Transport, freight, lorry, unspecified {RER}| market for transport, freight, lorry, unspecified | APOS, U	A5 - Tap water {Europe without Switzerland}| market for | APOS, U	A5 - Electricity grid mix, AC, consumption mix, at consumer, 230V IT S	Benefici - Transport, freight, lorry, unspecified {RER}| market for transport, freight, lorry, unspecified | APOS, U	Benefici - Waste plastic, mixture {RoW}| treatment of waste plastic, mixture, sanitary landfill | APOS, U	Totale				Categoria d'impatto	Unità	Cement, limestone 6-20% {RoW}| cement production, limestone 6-20% | Cut-off, U	T. Cemento_ Transport, freight, lorry, unspecified {RER}| market for transport, freight, lorry, unspecified | APOS, U	T. DELTA _ Transport, freight, lorry, unspecified {RER}| market for transport, freight, lorry, unspecified | APOS, U	Conveyor belt {GLO}| market for | APOS, U	Industrial machine, heavy, unspecified {RoW}| market for industrial machine, heavy, unspecified | APOS, U	Packing, cement {RoW}| processing | APOS, U	Rock crushing {RER}| processing | APOS, U	Electricity, medium voltage {IT}| market for | APOS, U	A4_ Transport, freight, lorry, unspecified {RER}| market for transport, freight, lorry, unspecified | APOS, U	A5 - Tap water {Europe without Switzerland}| market for | APOS, U	A5 - Electricity grid mix, AC, consumption mix, at consumer, 230V IT S	Benefici - Transport, freight, lorry, unspecified {RER}| market for transport, freight, lorry, unspecified | APOS, U	Benefici - Waste plastic, mixture {RoW}| treatment of waste plastic, mixture, sanitary landfill | APOS, U	Totale
	Climate change	kg CO2 eq	0.333981	0.00357402	0.0357402	4.25953e-05	1.60247e-05	0.00759062	0.000292848	0.0137938	0.00893504	0.000104639	0.0427702	-0.00238268	-0.105548	0.33891				Climate change	kg CO2 eq	0.333981	0.00357402	0.0357402	4.25953e-05	1.60247e-05	0.00759062	0.000292848	0.0137938	0.0893504	0.000104639	0.0427702	-0.00238268	-0.105548	0.419326
	Ozone depletion	kg CFC11 eq	1.13597e-08	8.20615e-10	8.20615e-09	2.40923e-12	1.03759e-12	4.00509e-10	2.6624e-11	1.91019e-09	2.05154e-09	9.37867e-12	3.75595e-10	-5.47077e-10	-2.97208e-09	2.16446e-08				Ozone depletion	kg CFC11 eq	1.13597e-08	8.20615e-10	8.20615e-09	2.40923e-12	1.03759e-12	4.00509e-10	2.6624e-11	1.91019e-09	2.05154e-08	9.37867e-12	3.75595e-10	-5.47077e-10	-2.97208e-09	4.01085e-08
	Ionising radiation	kBq U-235 eq	0.00698221	0.000284624	0.00284624	2.43097e-06	1.09926e-06	0.000460456	0.000150154	0.0015694	0.000711561	3.50137e-05	0.00169879	-0.000189749	-0.00114176	0.0134105				Ionising radiation	kBq U-235 eq	0.00698221	0.000284624	0.00284624	2.43097e-06	1.09926e-06	0.000460456	0.000150154	0.0015694	0.00711561	3.50137e-05	0.00169879	-0.000189749	-0.00114176	0.0198145
	Photochemical ozone formation	kg NMVOC eq	0.000797007	2.27668e-05	0.000227668	1.60315e-07	7.20811e-08	2.8641e-05	6.80282e-07	2.92679e-05	5.69169e-05	3.23915e-07	5.92739e-05	-1.51779e-05	-0.000112194	0.00109541				Photochemical ozone formation	kg NMVOC eq	0.000797007	2.27668e-05	0.000227668	1.60315e-07	7.20811e-08	2.8641e-05	6.80282e-07	2.92679e-05	0.000569169	3.23915e-07	5.92739e-05	-1.51779e-05	-0.000112194	0.00160766
	Particulate matter	disease inc.	6.91278e-09	3.23241e-10	3.23241e-09	3.39854e-12	1.42359e-12	1.85487e-09	5.58212e-12	2.44889e-10	8.08103e-10	5.35616e-12	8.61566e-10	-2.15494e-10	-1.58724e-09	1.24509e-08				Particulate matter	disease inc.	6.91278e-09	3.23241e-10	3.23241e-09	3.39854e-12	1.42359e-12	1.85487e-09	5.58212e-12	2.44889e-10	8.08103e-09	5.35616e-12	8.61566e-10	-2.15494e-10	-1.58724e-09	1.97238e-08
	Human toxicity, non-cancer	CTUh	2.55769e-09	5.22336e-11	5.22336e-10	3.37519e-12	1.94015e-12	1.55717e-10	4.94185e-12	7.86455e-11	1.30584e-10	6.06334e-12	6.37921e-11	-3.48224e-11	-2.19512e-10	3.32299e-09				Human toxicity, non-cancer	CTUh	2.55769e-09	5.22336e-11	5.22336e-10	3.37519e-12	1.94015e-12	1.55717e-10	4.94185e-12	7.86455e-11	1.30584e-09	6.06334e-12	6.37921e-11	-3.48224e-11	-2.19512e-10	4.49824e-09
	Human toxicity, cancer	CTUh	6.65378e-11	1.42809e-12	1.42809e-11	2.5824e-13	1.0341e-13	1.46021e-11	1.64823e-13	2.78301e-12	3.57021e-12	2.3912e-13	3.71755e-12	-9.52057e-13	-6.20715e-12	1.00526e-10				Human toxicity, cancer	CTUh	6.65378e-11	1.42809e-12	1.42809e-11	2.5824e-13	1.0341e-13	1.46021e-11	1.64823e-13	2.78301e-12	3.57021e-11	2.3912e-13	3.71755e-12	-9.52057e-13	-6.20715e-12	1.32658e-10
	Acidification	mol H+ eq	0.000993823	2.02544e-05	0.000202544	1.87976e-07	1.26133e-07	2.91175e-05	1.55547e-06	6.39752e-05	5.06361e-05	5.77076e-07	0.000107222	-1.3503e-05	-8.75994e-05	0.00136892				Acidification	mol H+ eq	0.000993823	2.02544e-05	0.000202544	1.87976e-07	1.26133e-07	2.91175e-05	1.55547e-06	6.39752e-05	0.000506361	5.77076e-07	0.000107222	-1.3503e-05	-8.75994e-05	0.00182464
	Eutrophication, freshwater	kg P eq	4.20676e-05	2.6806e-07	2.6806e-06	2.32083e-08	1.44762e-08	1.77347e-06	2.74256e-07	3.56998e-06	6.70149e-07	7.31361e-08	2.02095e-09	-1.78706e-07	-1.75032e-06	4.94879e-05				Eutrophication, freshwater	kg P eq	4.20676e-05	2.6806e-07	2.6806e-06	2.32083e-08	1.44762e-08	1.77347e-06	2.74256e-07	3.56998e-06	6.70149e-06	7.31361e-08	2.02095e-09	-1.78706e-07	-1.75032e-06	5.55192e-05
	Eutrophication, marine	kg N eq	0.000283873	7.30762e-06	7.30762e-05	4.25411e-08	1.96117e-08	1.29937e-05	2.75453e-07	1.00239e-05	1.82691e-05	1.12041e-07	1.90314e-05	-4.87175e-06	-0.00192533	-0.00150518				Eutrophication, marine	kg N eq	0.000283873	7.30762e-06	7.30762e-05	4.25411e-08	1.96117e-08	1.29937e-05	2.75453e-07	1.00239e-05	0.000182691	1.12041e-07	1.90314e-05	-4.87175e-06	-0.00192533	-0.00134076
	Eutrophication, terrestrial	mol N eq	0.00321064	7.98747e-05	0.000798747	4.16343e-07	2.05008e-07	8.40974e-05	2.44947e-06	0.000110331	0.000199687	1.05028e-06	0.000209191	-5.32498e-05	-0.00031506	0.00432838				Eutrophication, terrestrial	mol N eq	0.00321064	7.98747e-05	0.000798747	4.16343e-07	2.05008e-07	8.40974e-05	2.44947e-06	0.000110331	0.00199687	1.05028e-06	0.000209191	-5.32498e-05	-0.00031506	0.00612556
	Ecotoxicity, freshwater	CTUe	4.60969	0.0443323	0.443323	0.00145446	0.00105349	2.10072	0.00426773	0.2143	0.110831	0.00198274	0.168116	-0.0295549	-0.487935	7.18258				Ecotoxicity, freshwater	CTUe	4.60969	0.0443323	0.443323	0.00145446	0.00105349	2.10072	0.00426773	0.2143	1.10831	0.00198274	0.168116	-0.0295549	-0.487935	8.18006
	Land use	Pt	1.02996	0.0628542	0.628542	0.00112114	0.000676069	1.15493	0.0047623	0.340344	0.157136	0.00164087	0.0032731	-0.0419028	-0.578601	2.76473				Land use	Pt	1.02996	0.0628542	0.628542	0.00112114	0.000676069	1.15493	0.0047623	0.340344	1.57136	0.00164087	0.0032731	-0.0419028	-0.578601	4.17895
	Water use	m3 depriv.	0.0155889	0.000180976	0.00180976	1.86864e-05	7.06333e-06	0.00512927	8.34229e-05	0.0100199	0.000452439	0.0125001	0.0286051	-0.00012065	-0.0097948	0.0644802				Water use	m3 depriv.	0.0155889	0.000180976	0.00180976	1.86864e-05	7.06333e-06	0.00512927	8.34229e-05	0.0100199	0.00452439	0.0125001	0.0286051	-0.00012065	-0.0097948	0.0685521
	Resource use, fossils	MJ	1.55101	0.0544854	0.544854	0.000408843	0.000159496	0.0644715	0.00577662	0.187158	0.136213	0.00167952	0.595339	-0.0363236	-0.2303	2.87494				Resource use, fossils	MJ	1.55101	0.0544854	0.544854	0.000408843	0.000159496	0.0644715	0.00577662	0.187158	1.36213	0.00167952	0.595339	-0.0363236	-0.2303	4.10086
	Resource use, minerals and metals	kg Sb eq	2.31856e-05	8.37666e-08	8.37666e-07	1.5435e-09	8.13928e-10	7.3196e-08	1.28335e-09	3.94865e-08	2.09417e-07	2.98389e-09	3.73648e-09	-5.58444e-08	-1.17685e-07	2.4266e-05				Resource use, minerals and metals	kg Sb eq	2.31856e-05	8.37666e-08	8.37666e-07	1.5435e-09	8.13928e-10	7.3196e-08	1.28335e-09	3.94865e-08	2.09417e-06	2.98389e-09	3.73648e-09	-5.58444e-08	-1.17685e-07	2.61507e-05
	Climate change - Fossil	kg CO2 eq	0.330701	0.00357078	0.0357078	4.24758e-05	1.59886e-05	0.00417351	0.000282382	0.0125335	0.00892696	0.000102113	0.0428314	-0.00238052	-0.105485	0.331023				Climate change - Fossil	kg CO2 eq	0.330701	0.00357078	0.0357078	4.24758e-05	1.59886e-05	0.00417351	0.000282382	0.0125335	0.0892696	0.000102113	0.0428314	-0.00238052	-0.105485	0.411366
	Climate change - Biogenic	kg CO2 eq	0.00317501	1.83661e-06	1.83661e-05	1.25274e-08	-7.11704e-09	0.00339206	9.7275e-06	0.00124799	4.59153e-06	2.33634e-06	-6.12064e-05	-1.22441e-06	-5.74701e-05	0.00773202				Climate change - Biogenic	kg CO2 eq	0.00317501	1.83661e-06	1.83661e-05	1.25274e-08	-7.11704e-09	0.00339206	9.7275e-06	0.00124799	4.59153e-05	2.33634e-06	-6.12064e-05	-1.22441e-06	-5.74701e-05	0.00777335
	Climate change - Land use and LU change	kg CO2 eq	0.000105076	1.39574e-06	1.39574e-05	1.07024e-07	4.31495e-08	2.50512e-05	7.38199e-07	1.22948e-05	3.48936e-06	1.90093e-07	0	-9.30496e-07	-6.11337e-06	0.000155299				Climate change - Land use and LU change	kg CO2 eq	0.000105076	1.39574e-06	1.39574e-05	1.07024e-07	4.31495e-08	2.50512e-05	7.38199e-07	1.22948e-05	3.48936e-05	1.90093e-07	0	-9.30496e-07	-6.11337e-06	0.000186703
	Human toxicity, non-cancer - organics	CTUh	3.75683e-11	5.90864e-12	5.90864e-11	5.95903e-14	5.63053e-14	1.55108e-11	5.17015e-14	2.65288e-12	1.47716e-11	3.05862e-14	3.42499e-13	-3.93909e-12	-1.07067e-10	2.50333e-11				Human toxicity, non-cancer - organics	CTUh	3.75683e-11	5.90864e-12	5.90864e-11	5.95903e-14	5.63053e-14	1.55108e-11	5.17015e-14	2.65288e-12	1.47716e-10	3.05862e-14	3.42499e-13	-3.93909e-12	-1.07067e-10	1.57978e-10
	Human toxicity, non-cancer - inorganics	CTUh	3.84349e-10	1.00641e-11	1.00641e-10	4.65776e-13	1.78073e-13	4.75308e-11	3.97272e-13	1.13768e-11	2.51602e-11	5.46717e-13	2.16605e-11	-6.70938e-12	-7.33072e-11	5.22353e-10				Human toxicity, non-cancer - inorganics	CTUh	3.84349e-10	1.00641e-11	1.00641e-10	4.65776e-13	1.78073e-13	4.75308e-11	3.97272e-13	1.13768e-11	2.51602e-10	5.46717e-13	2.16605e-11	-6.70938e-12	-7.33072e-11	7.48795e-10
	Human toxicity, non-cancer - metals	CTUh	2.14731e-09	3.63706e-11	3.63706e-10	2.85397e-12	1.70737e-12	9.31608e-11	4.51352e-12	6.60075e-11	9.09264e-11	5.49466e-12	4.1789e-11	-2.4247e-11	-1.42758e-10	2.68683e-09				Human toxicity, non-cancer - metals	CTUh	2.14731e-09	3.63706e-11	3.63706e-10	2.85397e-12	1.70737e-12	9.31608e-11	4.51352e-12	6.60075e-11	9.09264e-10	5.49466e-12	4.1789e-11	-2.4247e-11	-1.42758e-10	3.50517e-09
	Human toxicity, cancer - organics	CTUh	3.3895e-11	8.40716e-13	8.40716e-12	6.84336e-14	2.63517e-14	1.23216e-11	5.16149e-14	1.09191e-12	2.10179e-12	8.08595e-14	2.09663e-12	-5.60478e-13	-2.13486e-12	5.82868e-11				Human toxicity, cancer - organics	CTUh	3.3895e-11	8.40716e-13	8.40716e-12	6.84336e-14	2.63517e-14	1.23216e-11	5.16149e-14	1.09191e-12	2.10179e-11	8.08595e-14	2.09663e-12	-5.60478e-13	-2.13486e-12	7.72029e-11
	Human toxicity, cancer - inorganics	CTUh	0	7.28961e-21	7.28961e-20	2.18973e-22	8.35363e-23	4.02402e-20	2.3319e-21	2.52748e-20	1.8224e-20	4.53414e-22	0	-4.85974e-21	-2.80337e-20	1.34119e-19				Human toxicity, cancer - inorganics	CTUh	0	7.28961e-21	7.28961e-20	2.18973e-22	8.35363e-23	4.02402e-20	2.3319e-21	2.52748e-20	1.8224e-19	4.53414e-22	0	-4.85974e-21	-2.80337e-20	2.98135e-19
	Human toxicity, cancer - metals	CTUh	3.26428e-11	5.87369e-13	5.87369e-12	1.89807e-13	7.70585e-14	2.28048e-12	1.13209e-13	1.6911e-12	1.46842e-12	1.5826e-13	1.62092e-12	-3.91579e-13	-4.07228e-12	4.22393e-11				Human toxicity, cancer - metals	CTUh	3.26428e-11	5.87369e-13	5.87369e-12	1.89807e-13	7.70585e-14	2.28048e-12	1.13209e-13	1.6911e-12	1.46842e-11	1.5826e-13	1.62092e-12	-3.91579e-13	-4.07228e-12	5.54551e-11
	Ecotoxicity, freshwater - organics	CTUe	0.0413495	0.00325729	0.0325729	1.46986e-05	8.96591e-06	0.00644932	2.90202e-05	0.0022292	0.00814322	3.40852e-05	0.000426527	-0.00217153	-0.012736	0.0796072				Ecotoxicity, freshwater - organics	CTUe	0.0413495	0.00325729	0.0325729	1.46986e-05	8.96591e-06	0.00644932	2.90202e-05	0.0022292	0.0814322	3.40852e-05	0.000426527	-0.00217153	-0.012736	0.152896
	Ecotoxicity, freshwater - inorganics	CTUe	0.267384	0.0114607	0.114607	0.00011231	8.2116e-05	0.0150168	0.000230669	0.0130356	0.0286517	0.000176803	0.13538	-0.00764047	-0.329888	0.248609				Ecotoxicity, freshwater - inorganics	CTUe	0.267384	0.0114607	0.114607	0.00011231	8.2116e-05	0.0150168	0.000230669	0.0130356	0.286517	0.000176803	0.13538	-0.00764047	-0.329888	0.506475
	Ecotoxicity, freshwater - metals	CTUe	4.30095	0.0296143	0.296143	0.00132745	0.000962412	2.07926	0.00400804	0.199035	0.0740357	0.00177185	0.0323089	-0.0197429	-0.145311	6.85436				Ecotoxicity, freshwater - metals	CTUe	4.30095	0.0296143	0.296143	0.00132745	0.000962412	2.07926	0.00400804	0.199035	0.740357	0.00177185	0.0323089	-0.0197429	-0.145311	7.52068
	Calculation:	Analizza																		Calculation:	Analizza
	Results:	Valutazione dell'impatto							DELTA (SB)											Results:	Valutazione dell'impatto							DELTA (SB)
	Product:	1 l 0. DELTA - Mortar {Europe without Switzerland}| production | APOS, U - A1-A5 (del progetto						Trasporto	RIF											Product:	1 l 0. DELTA - Mortar {Europe without Switzerland}| production | APOS, U - A1-A5 (del progetto						Trasporto	RIF
	Metodo:	EN 15804 +A2 Method V1.00 / EF 3.0 normalization and weighting set						Cemento	60											Metodo:	EN 15804 +A2 Method V1.00 / EF 3.0 normalization and weighting set						Cemento	60
	Indicatore:	Caratterizzazione							-											Indicatore:	Caratterizzazione							-
	Skip categories:	Mai						DELTA	400											Skip categories:	Mai						DELTA	400
	Esclude processi di infrastrutture:	No							-											Esclude processi di infrastrutture:	No							-
	Esclude le emissioni di lungo termine:	No						Fabbrica-cantiere	50											Esclude le emissioni di lungo termine:	No						Fabbrica-cantiere	500
	Sorted on item:	Categoria d'impatto							-											Sorted on item:	Categoria d'impatto							-
	Sort order:	Ascendente																		Sort order:	Ascendente
	0. DELTA - Mortar {Europe without Switzerland}| production | APOS, U - A1-A5		A1	A2		A3					A4	A5		Benefici mancato smaltimento		TOT				0. DELTA - Mortar {Europe without Switzerland}| production | APOS, U - A1-A5		A1	A2		A3					A4	A5		Benefici mancato smaltimento		TOT
	Categoria d'impatto	Unità	Cement, limestone 6-20% {RoW}| cement production, limestone 6-20% | Cut-off, U	T. Cemento_ Transport, freight, lorry, unspecified {RER}| market for transport, freight, lorry, unspecified | APOS, U	T. DELTA _ Transport, freight, lorry, unspecified {RER}| market for transport, freight, lorry, unspecified | APOS, U	Conveyor belt {GLO}| market for | APOS, U	Industrial machine, heavy, unspecified {RoW}| market for industrial machine, heavy, unspecified | APOS, U	Packing, cement {RoW}| processing | APOS, U	Rock crushing {RER}| processing | APOS, U	Electricity, medium voltage {IT}| market for | APOS, U	A4_ Transport, freight, lorry, unspecified {RER}| market for transport, freight, lorry, unspecified | APOS, U	A5 - Tap water {Europe without Switzerland}| market for | APOS, U	A5 - Electricity grid mix, AC, consumption mix, at consumer, 230V IT S	Benefici - Transport, freight, lorry, unspecified {RER}| market for transport, freight, lorry, unspecified | APOS, U	Benefici - Waste plastic, mixture {RoW}| treatment of waste plastic, mixture, sanitary landfill | APOS, U	Totale				Categoria d'impatto	Unità	Cement, limestone 6-20% {RoW}| cement production, limestone 6-20% | Cut-off, U	T. Cemento_ Transport, freight, lorry, unspecified {RER}| market for transport, freight, lorry, unspecified | APOS, U	T. DELTA _ Transport, freight, lorry, unspecified {RER}| market for transport, freight, lorry, unspecified | APOS, U	Conveyor belt {GLO}| market for | APOS, U	Industrial machine, heavy, unspecified {RoW}| market for industrial machine, heavy, unspecified | APOS, U	Packing, cement {RoW}| processing | APOS, U	Rock crushing {RER}| processing | APOS, U	Electricity, medium voltage {IT}| market for | APOS, U	A4_ Transport, freight, lorry, unspecified {RER}| market for transport, freight, lorry, unspecified | APOS, U	A5 - Tap water {Europe without Switzerland}| market for | APOS, U	A5 - Electricity grid mix, AC, consumption mix, at consumer, 230V IT S	Benefici - Transport, freight, lorry, unspecified {RER}| market for transport, freight, lorry, unspecified | APOS, U	Benefici - Waste plastic, mixture {RoW}| treatment of waste plastic, mixture, sanitary landfill | APOS, U	Totale
	Climate change	kg CO2 eq	0.333981	0.00357402	0.0476536	4.25953e-05	1.60247e-05	0.00759062	0.000292848	0.0137938	0.00893504	0.000104639	0.0427702	-0.00238268	-0.105548	0.350824				Climate change	kg CO2 eq	0.333981	0.00357402	0.0476536	4.25953e-05	1.60247e-05	0.00759062	0.000292848	0.0137938	0.0893504	0.000104639	0.0427702	-0.00238268	-0.105548	0.431239
	Ozone depletion	kg CFC11 eq	1.13597e-08	8.20615e-10	1.09415e-08	2.40923e-12	1.03759e-12	4.00509e-10	2.6624e-11	1.91019e-09	2.05154e-09	9.37867e-12	3.75595e-10	-5.47077e-10	-2.97208e-09	2.438e-08				Ozone depletion	kg CFC11 eq	1.13597e-08	8.20615e-10	1.09415e-08	2.40923e-12	1.03759e-12	4.00509e-10	2.6624e-11	1.91019e-09	2.05154e-08	9.37867e-12	3.75595e-10	-5.47077e-10	-2.97208e-09	4.28439e-08
	Ionising radiation	kBq U-235 eq	0.00698221	0.000284624	0.00379499	2.43097e-06	1.09926e-06	0.000460456	0.000150154	0.0015694	0.000711561	3.50137e-05	0.00169879	-0.000189749	-0.00114176	0.0143592				Ionising radiation	kBq U-235 eq	0.00698221	0.000284624	0.00379499	2.43097e-06	1.09926e-06	0.000460456	0.000150154	0.0015694	0.00711561	3.50137e-05	0.00169879	-0.000189749	-0.00114176	0.0207633
	Photochemical ozone formation	kg NMVOC eq	0.000797007	2.27668e-05	0.000303557	1.60315e-07	7.20811e-08	2.8641e-05	6.80282e-07	2.92679e-05	5.69169e-05	3.23915e-07	5.92739e-05	-1.51779e-05	-0.000112194	0.0011713				Photochemical ozone formation	kg NMVOC eq	0.000797007	2.27668e-05	0.000303557	1.60315e-07	7.20811e-08	2.8641e-05	6.80282e-07	2.92679e-05	0.000569169	3.23915e-07	5.92739e-05	-1.51779e-05	-0.000112194	0.00168355
	Particulate matter	disease inc.	6.91278e-09	3.23241e-10	4.30988e-09	3.39854e-12	1.42359e-12	1.85487e-09	5.58212e-12	2.44889e-10	8.08103e-10	5.35616e-12	8.61566e-10	-2.15494e-10	-1.58724e-09	1.35284e-08				Particulate matter	disease inc.	6.91278e-09	3.23241e-10	4.30988e-09	3.39854e-12	1.42359e-12	1.85487e-09	5.58212e-12	2.44889e-10	8.08103e-09	5.35616e-12	8.61566e-10	-2.15494e-10	-1.58724e-09	2.08013e-08
	Human toxicity, non-cancer	CTUh	2.55769e-09	5.22336e-11	6.96447e-10	3.37519e-12	1.94015e-12	1.55717e-10	4.94185e-12	7.86455e-11	1.30584e-10	6.06334e-12	6.37921e-11	-3.48224e-11	-2.19512e-10	3.4971e-09				Human toxicity, non-cancer	CTUh	2.55769e-09	5.22336e-11	6.96447e-10	3.37519e-12	1.94015e-12	1.55717e-10	4.94185e-12	7.86455e-11	1.30584e-09	6.06334e-12	6.37921e-11	-3.48224e-11	-2.19512e-10	4.67235e-09
	Human toxicity, cancer	CTUh	6.65378e-11	1.42809e-12	1.90411e-11	2.5824e-13	1.0341e-13	1.46021e-11	1.64823e-13	2.78301e-12	3.57021e-12	2.3912e-13	3.71755e-12	-9.52057e-13	-6.20715e-12	1.05286e-10				Human toxicity, cancer	CTUh	6.65378e-11	1.42809e-12	1.90411e-11	2.5824e-13	1.0341e-13	1.46021e-11	1.64823e-13	2.78301e-12	3.57021e-11	2.3912e-13	3.71755e-12	-9.52057e-13	-6.20715e-12	1.37418e-10
	Acidification	mol H+ eq	0.000993823	2.02544e-05	0.000270059	1.87976e-07	1.26133e-07	2.91175e-05	1.55547e-06	6.39752e-05	5.06361e-05	5.77076e-07	0.000107222	-1.3503e-05	-8.75994e-05	0.00143643				Acidification	mol H+ eq	0.000993823	2.02544e-05	0.000270059	1.87976e-07	1.26133e-07	2.91175e-05	1.55547e-06	6.39752e-05	0.000506361	5.77076e-07	0.000107222	-1.3503e-05	-8.75994e-05	0.00189216
	Eutrophication, freshwater	kg P eq	4.20676e-05	2.6806e-07	3.57413e-06	2.32083e-08	1.44762e-08	1.77347e-06	2.74256e-07	3.56998e-06	6.70149e-07	7.31361e-08	2.02095e-09	-1.78706e-07	-1.75032e-06	5.03814e-05				Eutrophication, freshwater	kg P eq	4.20676e-05	2.6806e-07	3.57413e-06	2.32083e-08	1.44762e-08	1.77347e-06	2.74256e-07	3.56998e-06	6.70149e-06	7.31361e-08	2.02095e-09	-1.78706e-07	-1.75032e-06	5.64128e-05
	Eutrophication, marine	kg N eq	0.000283873	7.30762e-06	9.7435e-05	4.25411e-08	1.96117e-08	1.29937e-05	2.75453e-07	1.00239e-05	1.82691e-05	1.12041e-07	1.90314e-05	-4.87175e-06	-0.00192533	-0.00148082				Eutrophication, marine	kg N eq	0.000283873	7.30762e-06	9.7435e-05	4.25411e-08	1.96117e-08	1.29937e-05	2.75453e-07	1.00239e-05	0.000182691	1.12041e-07	1.90314e-05	-4.87175e-06	-0.00192533	-0.0013164
	Eutrophication, terrestrial	mol N eq	0.00321064	7.98747e-05	0.001065	4.16343e-07	2.05008e-07	8.40974e-05	2.44947e-06	0.000110331	0.000199687	1.05028e-06	0.000209191	-5.32498e-05	-0.00031506	0.00459463				Eutrophication, terrestrial	mol N eq	0.00321064	7.98747e-05	0.001065	4.16343e-07	2.05008e-07	8.40974e-05	2.44947e-06	0.000110331	0.00199687	1.05028e-06	0.000209191	-5.32498e-05	-0.00031506	0.00639181
	Ecotoxicity, freshwater	CTUe	4.60969	0.0443323	0.591097	0.00145446	0.00105349	2.10072	0.00426773	0.2143	0.110831	0.00198274	0.168116	-0.0295549	-0.487935	7.33035				Ecotoxicity, freshwater	CTUe	4.60969	0.0443323	0.591097	0.00145446	0.00105349	2.10072	0.00426773	0.2143	1.10831	0.00198274	0.168116	-0.0295549	-0.487935	8.32783
	Land use	Pt	1.02996	0.0628542	0.838057	0.00112114	0.000676069	1.15493	0.0047623	0.340344	0.157136	0.00164087	0.0032731	-0.0419028	-0.578601	2.97424				Land use	Pt	1.02996	0.0628542	0.838057	0.00112114	0.000676069	1.15493	0.0047623	0.340344	1.57136	0.00164087	0.0032731	-0.0419028	-0.578601	4.38846
	Water use	m3 depriv.	0.0155889	0.000180976	0.00241301	1.86864e-05	7.06333e-06	0.00512927	8.34229e-05	0.0100199	0.000452439	0.0125001	0.0286051	-0.00012065	-0.0097948	0.0650834				Water use	m3 depriv.	0.0155889	0.000180976	0.00241301	1.86864e-05	7.06333e-06	0.00512927	8.34229e-05	0.0100199	0.00452439	0.0125001	0.0286051	-0.00012065	-0.0097948	0.0691554
	Resource use, fossils	MJ	1.55101	0.0544854	0.726472	0.000408843	0.000159496	0.0644715	0.00577662	0.187158	0.136213	0.00167952	0.595339	-0.0363236	-0.2303	3.05655				Resource use, fossils	MJ	1.55101	0.0544854	0.726472	0.000408843	0.000159496	0.0644715	0.00577662	0.187158	1.36213	0.00167952	0.595339	-0.0363236	-0.2303	4.28247
	Resource use, minerals and metals	kg Sb eq	2.31856e-05	8.37666e-08	1.11689e-06	1.5435e-09	8.13928e-10	7.3196e-08	1.28335e-09	3.94865e-08	2.09417e-07	2.98389e-09	3.73648e-09	-5.58444e-08	-1.17685e-07	2.45452e-05				Resource use, minerals and metals	kg Sb eq	2.31856e-05	8.37666e-08	1.11689e-06	1.5435e-09	8.13928e-10	7.3196e-08	1.28335e-09	3.94865e-08	2.09417e-06	2.98389e-09	3.73648e-09	-5.58444e-08	-1.17685e-07	2.643e-05
	Climate change - Fossil	kg CO2 eq	0.330701	0.00357078	0.0476105	4.24758e-05	1.59886e-05	0.00417351	0.000282382	0.0125335	0.00892696	0.000102113	0.0428314	-0.00238052	-0.105485	0.342926				Climate change - Fossil	kg CO2 eq	0.330701	0.00357078	0.0476105	4.24758e-05	1.59886e-05	0.00417351	0.000282382	0.0125335	0.0892696	0.000102113	0.0428314	-0.00238052	-0.105485	0.423268
	Climate change - Biogenic	kg CO2 eq	0.00317501	1.83661e-06	2.44882e-05	1.25274e-08	-7.11704e-09	0.00339206	9.7275e-06	0.00124799	4.59153e-06	2.33634e-06	-6.12064e-05	-1.22441e-06	-5.74701e-05	0.00773814				Climate change - Biogenic	kg CO2 eq	0.00317501	1.83661e-06	2.44882e-05	1.25274e-08	-7.11704e-09	0.00339206	9.7275e-06	0.00124799	4.59153e-05	2.33634e-06	-6.12064e-05	-1.22441e-06	-5.74701e-05	0.00777947
	Climate change - Land use and LU change	kg CO2 eq	0.000105076	1.39574e-06	1.86099e-05	1.07024e-07	4.31495e-08	2.50512e-05	7.38199e-07	1.22948e-05	3.48936e-06	1.90093e-07	0	-9.30496e-07	-6.11337e-06	0.000159952				Climate change - Land use and LU change	kg CO2 eq	0.000105076	1.39574e-06	1.86099e-05	1.07024e-07	4.31495e-08	2.50512e-05	7.38199e-07	1.22948e-05	3.48936e-05	1.90093e-07	0	-9.30496e-07	-6.11337e-06	0.000191356
	Human toxicity, non-cancer - organics	CTUh	3.75683e-11	5.90864e-12	7.87818e-11	5.95903e-14	5.63053e-14	1.55108e-11	5.17015e-14	2.65288e-12	1.47716e-11	3.05862e-14	3.42499e-13	-3.93909e-12	-1.07067e-10	4.47287e-11				Human toxicity, non-cancer - organics	CTUh	3.75683e-11	5.90864e-12	7.87818e-11	5.95903e-14	5.63053e-14	1.55108e-11	5.17015e-14	2.65288e-12	1.47716e-10	3.05862e-14	3.42499e-13	-3.93909e-12	-1.07067e-10	1.77673e-10
	Human toxicity, non-cancer - inorganics	CTUh	3.84349e-10	1.00641e-11	1.34188e-10	4.65776e-13	1.78073e-13	4.75308e-11	3.97272e-13	1.13768e-11	2.51602e-11	5.46717e-13	2.16605e-11	-6.70938e-12	-7.33072e-11	5.559e-10				Human toxicity, non-cancer - inorganics	CTUh	3.84349e-10	1.00641e-11	1.34188e-10	4.65776e-13	1.78073e-13	4.75308e-11	3.97272e-13	1.13768e-11	2.51602e-10	5.46717e-13	2.16605e-11	-6.70938e-12	-7.33072e-11	7.82342e-10
	Human toxicity, non-cancer - metals	CTUh	2.14731e-09	3.63706e-11	4.84941e-10	2.85397e-12	1.70737e-12	9.31608e-11	4.51352e-12	6.60075e-11	9.09264e-11	5.49466e-12	4.1789e-11	-2.4247e-11	-1.42758e-10	2.80807e-09				Human toxicity, non-cancer - metals	CTUh	2.14731e-09	3.63706e-11	4.84941e-10	2.85397e-12	1.70737e-12	9.31608e-11	4.51352e-12	6.60075e-11	9.09264e-10	5.49466e-12	4.1789e-11	-2.4247e-11	-1.42758e-10	3.6264e-09
	Human toxicity, cancer - organics	CTUh	3.3895e-11	8.40716e-13	1.12096e-11	6.84336e-14	2.63517e-14	1.23216e-11	5.16149e-14	1.09191e-12	2.10179e-12	8.08595e-14	2.09663e-12	-5.60478e-13	-2.13486e-12	6.10891e-11				Human toxicity, cancer - organics	CTUh	3.3895e-11	8.40716e-13	1.12096e-11	6.84336e-14	2.63517e-14	1.23216e-11	5.16149e-14	1.09191e-12	2.10179e-11	8.08595e-14	2.09663e-12	-5.60478e-13	-2.13486e-12	8.00053e-11
	Human toxicity, cancer - inorganics	CTUh	0	7.28961e-21	9.71947e-20	2.18973e-22	8.35363e-23	4.02402e-20	2.3319e-21	2.52748e-20	1.8224e-20	4.53414e-22	0	-4.85974e-21	-2.80337e-20	1.58418e-19				Human toxicity, cancer - inorganics	CTUh	0	7.28961e-21	9.71947e-20	2.18973e-22	8.35363e-23	4.02402e-20	2.3319e-21	2.52748e-20	1.8224e-19	4.53414e-22	0	-4.85974e-21	-2.80337e-20	3.22434e-19
	Human toxicity, cancer - metals	CTUh	3.26428e-11	5.87369e-13	7.83158e-12	1.89807e-13	7.70585e-14	2.28048e-12	1.13209e-13	1.6911e-12	1.46842e-12	1.5826e-13	1.62092e-12	-3.91579e-13	-4.07228e-12	4.41972e-11				Human toxicity, cancer - metals	CTUh	3.26428e-11	5.87369e-13	7.83158e-12	1.89807e-13	7.70585e-14	2.28048e-12	1.13209e-13	1.6911e-12	1.46842e-11	1.5826e-13	1.62092e-12	-3.91579e-13	-4.07228e-12	5.7413e-11
	Ecotoxicity, freshwater - organics	CTUe	0.0413495	0.00325729	0.0434305	1.46986e-05	8.96591e-06	0.00644932	2.90202e-05	0.0022292	0.00814322	3.40852e-05	0.000426527	-0.00217153	-0.012736	0.0904648				Ecotoxicity, freshwater - organics	CTUe	0.0413495	0.00325729	0.0434305	1.46986e-05	8.96591e-06	0.00644932	2.90202e-05	0.0022292	0.0814322	3.40852e-05	0.000426527	-0.00217153	-0.012736	0.163754
	Ecotoxicity, freshwater - inorganics	CTUe	0.267384	0.0114607	0.152809	0.00011231	8.2116e-05	0.0150168	0.000230669	0.0130356	0.0286517	0.000176803	0.13538	-0.00764047	-0.329888	0.286812				Ecotoxicity, freshwater - inorganics	CTUe	0.267384	0.0114607	0.152809	0.00011231	8.2116e-05	0.0150168	0.000230669	0.0130356	0.286517	0.000176803	0.13538	-0.00764047	-0.329888	0.544677
	Ecotoxicity, freshwater - metals	CTUe	4.30095	0.0296143	0.394857	0.00132745	0.000962412	2.07926	0.00400804	0.199035	0.0740357	0.00177185	0.0323089	-0.0197429	-0.145311	6.95308				Ecotoxicity, freshwater - metals	CTUe	4.30095	0.0296143	0.394857	0.00132745	0.000962412	2.07926	0.00400804	0.199035	0.740357	0.00177185	0.0323089	-0.0197429	-0.145311	7.6194
	Calculation:	Analizza																		Calculation:	Analizza
	Results:	Valutazione dell'impatto							DELTA (SB)											Results:	Valutazione dell'impatto							DELTA (SB)
	Product:	1 l 0. DELTA - Mortar {Europe without Switzerland}| production | APOS, U - A1-A5 (del progetto						Trasporto	RIF											Product:	1 l 0. DELTA - Mortar {Europe without Switzerland}| production | APOS, U - A1-A5 (del progetto						Trasporto	RIF
	Metodo:	EN 15804 +A2 Method V1.00 / EF 3.0 normalization and weighting set						Cemento	60											Metodo:	EN 15804 +A2 Method V1.00 / EF 3.0 normalization and weighting set						Cemento	60
	Indicatore:	Caratterizzazione							-											Indicatore:	Caratterizzazione							-
	Skip categories:	Mai						DELTA	500											Skip categories:	Mai						DELTA	500
	Esclude processi di infrastrutture:	No							-											Esclude processi di infrastrutture:	No							-
	Esclude le emissioni di lungo termine:	No						Fabbrica-cantiere	50											Esclude le emissioni di lungo termine:	No						Fabbrica-cantiere	500
	Sorted on item:	Categoria d'impatto							-											Sorted on item:	Categoria d'impatto							-
	Sort order:	Ascendente																		Sort order:	Ascendente
	0. DELTA - Mortar {Europe without Switzerland}| production | APOS, U - A1-A5		A1	A2		A3					A4	A5		Benefici mancato smaltimento		TOT				0. DELTA - Mortar {Europe without Switzerland}| production | APOS, U - A1-A5		A1	A2		A3					A4	A5		Benefici mancato smaltimento		TOT
	Categoria d'impatto	Unità	Cement, limestone 6-20% {RoW}| cement production, limestone 6-20% | Cut-off, U	T. Cemento_ Transport, freight, lorry, unspecified {RER}| market for transport, freight, lorry, unspecified | APOS, U	T. DELTA _ Transport, freight, lorry, unspecified {RER}| market for transport, freight, lorry, unspecified | APOS, U	Conveyor belt {GLO}| market for | APOS, U	Industrial machine, heavy, unspecified {RoW}| market for industrial machine, heavy, unspecified | APOS, U	Packing, cement {RoW}| processing | APOS, U	Rock crushing {RER}| processing | APOS, U	Electricity, medium voltage {IT}| market for | APOS, U	A4_ Transport, freight, lorry, unspecified {RER}| market for transport, freight, lorry, unspecified | APOS, U	A5 - Tap water {Europe without Switzerland}| market for | APOS, U	A5 - Electricity grid mix, AC, consumption mix, at consumer, 230V IT S	Benefici - Transport, freight, lorry, unspecified {RER}| market for transport, freight, lorry, unspecified | APOS, U	Benefici - Waste plastic, mixture {RoW}| treatment of waste plastic, mixture, sanitary landfill | APOS, U	Totale				Categoria d'impatto	Unità	Cement, limestone 6-20% {RoW}| cement production, limestone 6-20% | Cut-off, U	T. Cemento_ Transport, freight, lorry, unspecified {RER}| market for transport, freight, lorry, unspecified | APOS, U	T. DELTA _ Transport, freight, lorry, unspecified {RER}| market for transport, freight, lorry, unspecified | APOS, U	Conveyor belt {GLO}| market for | APOS, U	Industrial machine, heavy, unspecified {RoW}| market for industrial machine, heavy, unspecified | APOS, U	Packing, cement {RoW}| processing | APOS, U	Rock crushing {RER}| processing | APOS, U	Electricity, medium voltage {IT}| market for | APOS, U	A4_ Transport, freight, lorry, unspecified {RER}| market for transport, freight, lorry, unspecified | APOS, U	A5 - Tap water {Europe without Switzerland}| market for | APOS, U	A5 - Electricity grid mix, AC, consumption mix, at consumer, 230V IT S	Benefici - Transport, freight, lorry, unspecified {RER}| market for transport, freight, lorry, unspecified | APOS, U	Benefici - Waste plastic, mixture {RoW}| treatment of waste plastic, mixture, sanitary landfill | APOS, U	Totale
	Climate change	kg CO2 eq	0.333981	0.00357402	0.0595669	4.25953e-05	1.60247e-05	0.00759062	0.000292848	0.0137938	0.00893504	0.000104639	0.0427702	-0.00238268	-0.105548	0.362737				Climate change	kg CO2 eq	0.333981	0.00357402	0.0595669	4.25953e-05	1.60247e-05	0.00759062	0.000292848	0.0137938	0.0893504	0.000104639	0.0427702	-0.00238268	-0.105548	0.443152
	Ozone depletion	kg CFC11 eq	1.13597e-08	8.20615e-10	1.36769e-08	2.40923e-12	1.03759e-12	4.00509e-10	2.6624e-11	1.91019e-09	2.05154e-09	9.37867e-12	3.75595e-10	-5.47077e-10	-2.97208e-09	2.71154e-08				Ozone depletion	kg CFC11 eq	1.13597e-08	8.20615e-10	1.36769e-08	2.40923e-12	1.03759e-12	4.00509e-10	2.6624e-11	1.91019e-09	2.05154e-08	9.37867e-12	3.75595e-10	-5.47077e-10	-2.97208e-09	4.55792e-08
	Ionising radiation	kBq U-235 eq	0.00698221	0.000284624	0.00474374	2.43097e-06	1.09926e-06	0.000460456	0.000150154	0.0015694	0.000711561	3.50137e-05	0.00169879	-0.000189749	-0.00114176	0.015308				Ionising radiation	kBq U-235 eq	0.00698221	0.000284624	0.00474374	2.43097e-06	1.09926e-06	0.000460456	0.000150154	0.0015694	0.00711561	3.50137e-05	0.00169879	-0.000189749	-0.00114176	0.021712
	Photochemical ozone formation	kg NMVOC eq	0.000797007	2.27668e-05	0.000379446	1.60315e-07	7.20811e-08	2.8641e-05	6.80282e-07	2.92679e-05	5.69169e-05	3.23915e-07	5.92739e-05	-1.51779e-05	-0.000112194	0.00124719				Photochemical ozone formation	kg NMVOC eq	0.000797007	2.27668e-05	0.000379446	1.60315e-07	7.20811e-08	2.8641e-05	6.80282e-07	2.92679e-05	0.000569169	3.23915e-07	5.92739e-05	-1.51779e-05	-0.000112194	0.00175944
	Particulate matter	disease inc.	6.91278e-09	3.23241e-10	5.38735e-09	3.39854e-12	1.42359e-12	1.85487e-09	5.58212e-12	2.44889e-10	8.08103e-10	5.35616e-12	8.61566e-10	-2.15494e-10	-1.58724e-09	1.46058e-08				Particulate matter	disease inc.	6.91278e-09	3.23241e-10	5.38735e-09	3.39854e-12	1.42359e-12	1.85487e-09	5.58212e-12	2.44889e-10	8.08103e-09	5.35616e-12	8.61566e-10	-2.15494e-10	-1.58724e-09	2.18788e-08
	Human toxicity, non-cancer	CTUh	2.55769e-09	5.22336e-11	8.70559e-10	3.37519e-12	1.94015e-12	1.55717e-10	4.94185e-12	7.86455e-11	1.30584e-10	6.06334e-12	6.37921e-11	-3.48224e-11	-2.19512e-10	3.67121e-09				Human toxicity, non-cancer	CTUh	2.55769e-09	5.22336e-11	8.70559e-10	3.37519e-12	1.94015e-12	1.55717e-10	4.94185e-12	7.86455e-11	1.30584e-09	6.06334e-12	6.37921e-11	-3.48224e-11	-2.19512e-10	4.84646e-09
	Human toxicity, cancer	CTUh	6.65378e-11	1.42809e-12	2.38014e-11	2.5824e-13	1.0341e-13	1.46021e-11	1.64823e-13	2.78301e-12	3.57021e-12	2.3912e-13	3.71755e-12	-9.52057e-13	-6.20715e-12	1.10047e-10				Human toxicity, cancer	CTUh	6.65378e-11	1.42809e-12	2.38014e-11	2.5824e-13	1.0341e-13	1.46021e-11	1.64823e-13	2.78301e-12	3.57021e-11	2.3912e-13	3.71755e-12	-9.52057e-13	-6.20715e-12	1.42179e-10
	Acidification	mol H+ eq	0.000993823	2.02544e-05	0.000337574	1.87976e-07	1.26133e-07	2.91175e-05	1.55547e-06	6.39752e-05	5.06361e-05	5.77076e-07	0.000107222	-1.3503e-05	-8.75994e-05	0.00150395				Acidification	mol H+ eq	0.000993823	2.02544e-05	0.000337574	1.87976e-07	1.26133e-07	2.91175e-05	1.55547e-06	6.39752e-05	0.000506361	5.77076e-07	0.000107222	-1.3503e-05	-8.75994e-05	0.00195967
	Eutrophication, freshwater	kg P eq	4.20676e-05	2.6806e-07	4.46766e-06	2.32083e-08	1.44762e-08	1.77347e-06	2.74256e-07	3.56998e-06	6.70149e-07	7.31361e-08	2.02095e-09	-1.78706e-07	-1.75032e-06	5.1275e-05				Eutrophication, freshwater	kg P eq	4.20676e-05	2.6806e-07	4.46766e-06	2.32083e-08	1.44762e-08	1.77347e-06	2.74256e-07	3.56998e-06	6.70149e-06	7.31361e-08	2.02095e-09	-1.78706e-07	-1.75032e-06	5.73063e-05
	Eutrophication, marine	kg N eq	0.000283873	7.30762e-06	0.000121794	4.25411e-08	1.96117e-08	1.29937e-05	2.75453e-07	1.00239e-05	1.82691e-05	1.12041e-07	1.90314e-05	-4.87175e-06	-0.00192533	-0.00145646				Eutrophication, marine	kg N eq	0.000283873	7.30762e-06	0.000121794	4.25411e-08	1.96117e-08	1.29937e-05	2.75453e-07	1.00239e-05	0.000182691	1.12041e-07	1.90314e-05	-4.87175e-06	-0.00192533	-0.00129204
	Eutrophication, terrestrial	mol N eq	0.00321064	7.98747e-05	0.00133124	4.16343e-07	2.05008e-07	8.40974e-05	2.44947e-06	0.000110331	0.000199687	1.05028e-06	0.000209191	-5.32498e-05	-0.00031506	0.00486088				Eutrophication, terrestrial	mol N eq	0.00321064	7.98747e-05	0.00133124	4.16343e-07	2.05008e-07	8.40974e-05	2.44947e-06	0.000110331	0.00199687	1.05028e-06	0.000209191	-5.32498e-05	-0.00031506	0.00665806
	Ecotoxicity, freshwater	CTUe	4.60969	0.0443323	0.738871	0.00145446	0.00105349	2.10072	0.00426773	0.2143	0.110831	0.00198274	0.168116	-0.0295549	-0.487935	7.47813				Ecotoxicity, freshwater	CTUe	4.60969	0.0443323	0.738871	0.00145446	0.00105349	2.10072	0.00426773	0.2143	1.10831	0.00198274	0.168116	-0.0295549	-0.487935	8.4756
	Land use	Pt	1.02996	0.0628542	1.04757	0.00112114	0.000676069	1.15493	0.0047623	0.340344	0.157136	0.00164087	0.0032731	-0.0419028	-0.578601	3.18376				Land use	Pt	1.02996	0.0628542	1.04757	0.00112114	0.000676069	1.15493	0.0047623	0.340344	1.57136	0.00164087	0.0032731	-0.0419028	-0.578601	4.59798
	Water use	m3 depriv.	0.0155889	0.000180976	0.00301626	1.86864e-05	7.06333e-06	0.00512927	8.34229e-05	0.0100199	0.000452439	0.0125001	0.0286051	-0.00012065	-0.0097948	0.0656867				Water use	m3 depriv.	0.0155889	0.000180976	0.00301626	1.86864e-05	7.06333e-06	0.00512927	8.34229e-05	0.0100199	0.00452439	0.0125001	0.0286051	-0.00012065	-0.0097948	0.0697586
	Resource use, fossils	MJ	1.55101	0.0544854	0.90809	0.000408843	0.000159496	0.0644715	0.00577662	0.187158	0.136213	0.00167952	0.595339	-0.0363236	-0.2303	3.23817				Resource use, fossils	MJ	1.55101	0.0544854	0.90809	0.000408843	0.000159496	0.0644715	0.00577662	0.187158	1.36213	0.00167952	0.595339	-0.0363236	-0.2303	4.46409
	Resource use, minerals and metals	kg Sb eq	2.31856e-05	8.37666e-08	1.39611e-06	1.5435e-09	8.13928e-10	7.3196e-08	1.28335e-09	3.94865e-08	2.09417e-07	2.98389e-09	3.73648e-09	-5.58444e-08	-1.17685e-07	2.48244e-05				Resource use, minerals and metals	kg Sb eq	2.31856e-05	8.37666e-08	1.39611e-06	1.5435e-09	8.13928e-10	7.3196e-08	1.28335e-09	3.94865e-08	2.09417e-06	2.98389e-09	3.73648e-09	-5.58444e-08	-1.17685e-07	2.67092e-05
	Climate change - Fossil	kg CO2 eq	0.330701	0.00357078	0.0595131	4.24758e-05	1.59886e-05	0.00417351	0.000282382	0.0125335	0.00892696	0.000102113	0.0428314	-0.00238052	-0.105485	0.354828				Climate change - Fossil	kg CO2 eq	0.330701	0.00357078	0.0595131	4.24758e-05	1.59886e-05	0.00417351	0.000282382	0.0125335	0.0892696	0.000102113	0.0428314	-0.00238052	-0.105485	0.435171
	Climate change - Biogenic	kg CO2 eq	0.00317501	1.83661e-06	3.06102e-05	1.25274e-08	-7.11704e-09	0.00339206	9.7275e-06	0.00124799	4.59153e-06	2.33634e-06	-6.12064e-05	-1.22441e-06	-5.74701e-05	0.00774427				Climate change - Biogenic	kg CO2 eq	0.00317501	1.83661e-06	3.06102e-05	1.25274e-08	-7.11704e-09	0.00339206	9.7275e-06	0.00124799	4.59153e-05	2.33634e-06	-6.12064e-05	-1.22441e-06	-5.74701e-05	0.00778559
	Climate change - Land use and LU change	kg CO2 eq	0.000105076	1.39574e-06	2.32624e-05	1.07024e-07	4.31495e-08	2.50512e-05	7.38199e-07	1.22948e-05	3.48936e-06	1.90093e-07	0	-9.30496e-07	-6.11337e-06	0.000164604				Climate change - Land use and LU change	kg CO2 eq	0.000105076	1.39574e-06	2.32624e-05	1.07024e-07	4.31495e-08	2.50512e-05	7.38199e-07	1.22948e-05	3.48936e-05	1.90093e-07	0	-9.30496e-07	-6.11337e-06	0.000196008
	Human toxicity, non-cancer - organics	CTUh	3.75683e-11	5.90864e-12	9.84773e-11	5.95903e-14	5.63053e-14	1.55108e-11	5.17015e-14	2.65288e-12	1.47716e-11	3.05862e-14	3.42499e-13	-3.93909e-12	-1.07067e-10	6.44242e-11				Human toxicity, non-cancer - organics	CTUh	3.75683e-11	5.90864e-12	9.84773e-11	5.95903e-14	5.63053e-14	1.55108e-11	5.17015e-14	2.65288e-12	1.47716e-10	3.05862e-14	3.42499e-13	-3.93909e-12	-1.07067e-10	1.97368e-10
	Human toxicity, non-cancer - inorganics	CTUh	3.84349e-10	1.00641e-11	1.67734e-10	4.65776e-13	1.78073e-13	4.75308e-11	3.97272e-13	1.13768e-11	2.51602e-11	5.46717e-13	2.16605e-11	-6.70938e-12	-7.33072e-11	5.89447e-10				Human toxicity, non-cancer - inorganics	CTUh	3.84349e-10	1.00641e-11	1.67734e-10	4.65776e-13	1.78073e-13	4.75308e-11	3.97272e-13	1.13768e-11	2.51602e-10	5.46717e-13	2.16605e-11	-6.70938e-12	-7.33072e-11	8.15889e-10
	Human toxicity, non-cancer - metals	CTUh	2.14731e-09	3.63706e-11	6.06176e-10	2.85397e-12	1.70737e-12	9.31608e-11	4.51352e-12	6.60075e-11	9.09264e-11	5.49466e-12	4.1789e-11	-2.4247e-11	-1.42758e-10	2.9293e-09				Human toxicity, non-cancer - metals	CTUh	2.14731e-09	3.63706e-11	6.06176e-10	2.85397e-12	1.70737e-12	9.31608e-11	4.51352e-12	6.60075e-11	9.09264e-10	5.49466e-12	4.1789e-11	-2.4247e-11	-1.42758e-10	3.74764e-09
	Human toxicity, cancer - organics	CTUh	3.3895e-11	8.40716e-13	1.40119e-11	6.84336e-14	2.63517e-14	1.23216e-11	5.16149e-14	1.09191e-12	2.10179e-12	8.08595e-14	2.09663e-12	-5.60478e-13	-2.13486e-12	6.38915e-11				Human toxicity, cancer - organics	CTUh	3.3895e-11	8.40716e-13	1.40119e-11	6.84336e-14	2.63517e-14	1.23216e-11	5.16149e-14	1.09191e-12	2.10179e-11	8.08595e-14	2.09663e-12	-5.60478e-13	-2.13486e-12	8.28077e-11
	Human toxicity, cancer - inorganics	CTUh	0	7.28961e-21	1.21493e-19	2.18973e-22	8.35363e-23	4.02402e-20	2.3319e-21	2.52748e-20	1.8224e-20	4.53414e-22	0	-4.85974e-21	-2.80337e-20	1.82716e-19				Human toxicity, cancer - inorganics	CTUh	0	7.28961e-21	1.21493e-19	2.18973e-22	8.35363e-23	4.02402e-20	2.3319e-21	2.52748e-20	1.8224e-19	4.53414e-22	0	-4.85974e-21	-2.80337e-20	3.46733e-19
	Human toxicity, cancer - metals	CTUh	3.26428e-11	5.87369e-13	9.78948e-12	1.89807e-13	7.70585e-14	2.28048e-12	1.13209e-13	1.6911e-12	1.46842e-12	1.5826e-13	1.62092e-12	-3.91579e-13	-4.07228e-12	4.61551e-11				Human toxicity, cancer - metals	CTUh	3.26428e-11	5.87369e-13	9.78948e-12	1.89807e-13	7.70585e-14	2.28048e-12	1.13209e-13	1.6911e-12	1.46842e-11	1.5826e-13	1.62092e-12	-3.91579e-13	-4.07228e-12	5.93709e-11
	Ecotoxicity, freshwater - organics	CTUe	0.0413495	0.00325729	0.0542881	1.46986e-05	8.96591e-06	0.00644932	2.90202e-05	0.0022292	0.00814322	3.40852e-05	0.000426527	-0.00217153	-0.012736	0.101322				Ecotoxicity, freshwater - organics	CTUe	0.0413495	0.00325729	0.0542881	1.46986e-05	8.96591e-06	0.00644932	2.90202e-05	0.0022292	0.0814322	3.40852e-05	0.000426527	-0.00217153	-0.012736	0.174611
	Ecotoxicity, freshwater - inorganics	CTUe	0.267384	0.0114607	0.191012	0.00011231	8.2116e-05	0.0150168	0.000230669	0.0130356	0.0286517	0.000176803	0.13538	-0.00764047	-0.329888	0.325014				Ecotoxicity, freshwater - inorganics	CTUe	0.267384	0.0114607	0.191012	0.00011231	8.2116e-05	0.0150168	0.000230669	0.0130356	0.286517	0.000176803	0.13538	-0.00764047	-0.329888	0.58288
	Ecotoxicity, freshwater - metals	CTUe	4.30095	0.0296143	0.493572	0.00132745	0.000962412	2.07926	0.00400804	0.199035	0.0740357	0.00177185	0.0323089	-0.0197429	-0.145311	7.05179				Ecotoxicity, freshwater - metals	CTUe	4.30095	0.0296143	0.493572	0.00132745	0.000962412	2.07926	0.00400804	0.199035	0.740357	0.00177185	0.0323089	-0.0197429	-0.145311	7.71811
	DELTA
	Categoria d'impatto	Unità	INVARIANTE	T. DELTA _ Transport, freight, lorry, unspecified {RER}| market for transport, freight, lorry, unspecified | APOS, U	km distanza fabbrica malta - sabbia	A4_ Transport, freight, lorry, unspecified {RER}| market for transport, freight, lorry, unspecified | APOS, U	km distanza tra fabbrica malta e cantiere	SOMMA
	Climate change	kg CO2 eq	0.294235	0.000119134	0	0.000178701	0	0.294235
	Ozone depletion	kg CFC11 eq	1.13869e-08	2.73538e-11	0	4.10308e-11	0	1.13869e-08
	Ionising radiation	kBq U-235 eq	0.00985266	9.48747e-06	0	1.42312e-05	0	0.00985266
	Photochemical ozone formation	kg NMVOC eq	0.000810822	7.58893e-07	0	1.13834e-06	0	0.000810822
	Particulate matter	disease inc.	8.41038e-09	1.07747e-11	0	1.61621e-11	0	8.41038e-09
	Human toxicity, non-cancer	CTUh	2.67007e-09	1.74112e-12	0	2.61168e-12	0	2.67007e-09
	Human toxicity, cancer	CTUh	8.2675e-11	4.76028e-14	0	7.14043e-14	0	8.2675e-11
	Acidification	mol H+ eq	0.00111574	6.75148e-07	0	1.01272e-06	0	0.00111574
	Eutrophication, freshwater	kg P eq	4.61371e-05	8.93532e-09	0	1.3403e-08	0	4.61371e-05
	Eutrophication, marine	kg N eq	-0.00159652	2.43587e-07	0	3.65381e-07	0	-0.00159652
	Eutrophication, terrestrial	mol N eq	0.00332995	2.66249e-06	0	3.99374e-06	0	0.00332995
	Ecotoxicity, freshwater	CTUe	6.62843	0.00147774	0	0.00221661	0	6.62843
	Land use	Pt	1.97905	0.00209514	0	0.00314271	0	1.97905
	Water use	m3 depriv.	0.062218	6.03252e-06	0	9.04878e-06	0	0.062218
	Resource use, fossils	MJ	2.19387	0.00181618	0	0.00272427	0	2.19387
	Resource use, minerals and metals	kg Sb eq	2.32189e-05	2.79222e-09	0	4.18833e-09	0	2.32189e-05
	Climate change - Fossil	kg CO2 eq	0.286388	0.000119026	0	0.000178539	0	0.286388
	Climate change - Biogenic	kg CO2 eq	0.00770906	6.12204e-08	0	9.18306e-08	0	0.00770906
	Climate change - Land use and LU change	kg CO2 eq	0.000137852	4.65248e-08	0	6.97872e-08	0	0.000137852
	Human toxicity, non-cancer - organics	CTUh	-4.88247e-11	1.96955e-13	0	2.95432e-13	0	-4.88247e-11
	Human toxicity, non-cancer - inorganics	CTUh	3.96552e-10	3.35469e-13	0	5.03203e-13	0	3.96552e-10
	Human toxicity, non-cancer - metals	CTUh	2.2322e-09	1.21235e-12	0	1.81853e-12	0	2.2322e-09
	Human toxicity, cancer - organics	CTUh	4.77778e-11	2.80239e-14	0	4.20358e-14	0	4.77778e-11
	Human toxicity, cancer - inorganics	CTUh	4.2999e-20	2.42987e-22	0	3.6448e-22	0	4.2999e-20
	Human toxicity, cancer - metals	CTUh	3.48972e-11	1.9579e-14	0	2.93684e-14	0	3.48972e-11
	Ecotoxicity, freshwater - organics	CTUe	0.0388911	0.000108576	0	0.000162864	0	0.0388911
	Ecotoxicity, freshwater - inorganics	CTUe	0.10535	0.000382023	0	0.000573035	0	0.10535
	Ecotoxicity, freshwater - metals	CTUe	6.48418	0.000987143	0	0.00148071	0	6.48418
	Non rinnovabile	MJ	2.34294	0.00192815	0	0.00289223	0	2.34294
	Rinnovabile	MJ	0.381909	2.77326e-05	0	4.15989e-05	0	0.381909

## Sheet: DELTA (CED)
	Calculation:	Analizza								Scenario SB-1A										Calculation:	Analizza								Scenario SB-1A
	Results:	Valutazione dell'impatto							Trasporto	RIF										Results:	Valutazione dell'impatto							Trasporto	RIF
	Product:	1 l 0. DELTA - Mortar {Europe without Switzerland}| production | APOS, U - A1-A5 (del progetto							Cemento	60										Product:	1 l 0. DELTA - Mortar {Europe without Switzerland}| production | APOS, U - A1-A5 (del progetto							Cemento	60
	Metodo:	Cumulative Energy Demand V1.11 / Cumulative energy demand							DELTA	0										Metodo:	Cumulative Energy Demand V1.11 / Cumulative energy demand							DELTA	0
	Indicatore:	Caratterizzazione								-										Indicatore:	Caratterizzazione								-
	Skip categories:	Mai								-										Skip categories:	Mai								-
	Esclude processi di infrastrutture:	No							Fabbrica-cantiere	50										Esclude processi di infrastrutture:	No							Fabbrica-cantiere	500
	Esclude le emissioni di lungo termine:	No								-										Esclude le emissioni di lungo termine:	No								-
	Sorted on item:	Categoria d'impatto																		Sorted on item:	Categoria d'impatto
	Sort order:	Ascendente																		Sort order:	Ascendente
	Categoria d'impatto	Unità	Cement, limestone 6-20% {RoW}| cement production, limestone 6-20% | Cut-off, U	Conveyor belt {GLO}| market for | APOS, U	Industrial machine, heavy, unspecified {RoW}| market for industrial machine, heavy, unspecified | APOS, U	Packing, cement {RoW}| processing | APOS, U	Rock crushing {RER}| processing | APOS, U	T. Cemento_ Transport, freight, lorry, unspecified {RER}| market for transport, freight, lorry, unspecified | APOS, U	T. DELTA _ Transport, freight, lorry, unspecified {RER}| market for transport, freight, lorry, unspecified | APOS, U	A4_ Transport, freight, lorry, unspecified {RER}| market for transport, freight, lorry, unspecified | APOS, U	A5 - Tap water {Europe without Switzerland}| market for | APOS, U	Benefici - Transport, freight, lorry, unspecified {RER}| market for transport, freight, lorry, unspecified | APOS, U	Benefici - Waste plastic, mixture {RoW}| treatment of waste plastic, mixture, sanitary landfill | APOS, U	Electricity, medium voltage {IT}| market for | APOS, U	A5 - Electricity grid mix, AC, consumption mix, at consumer, 230V IT S	Totale				Categoria d'impatto	Unità	Cement, limestone 6-20% {RoW}| cement production, limestone 6-20% | Cut-off, U	Conveyor belt {GLO}| market for | APOS, U	Industrial machine, heavy, unspecified {RoW}| market for industrial machine, heavy, unspecified | APOS, U	Packing, cement {RoW}| processing | APOS, U	Rock crushing {RER}| processing | APOS, U	T. Cemento_ Transport, freight, lorry, unspecified {RER}| market for transport, freight, lorry, unspecified | APOS, U	T. DELTA _ Transport, freight, lorry, unspecified {RER}| market for transport, freight, lorry, unspecified | APOS, U	A4_ Transport, freight, lorry, unspecified {RER}| market for transport, freight, lorry, unspecified | APOS, U	A5 - Tap water {Europe without Switzerland}| market for | APOS, U	Benefici - Transport, freight, lorry, unspecified {RER}| market for transport, freight, lorry, unspecified | APOS, U	Benefici - Waste plastic, mixture {RoW}| treatment of waste plastic, mixture, sanitary landfill | APOS, U	Electricity, medium voltage {IT}| market for | APOS, U	A5 - Electricity grid mix, AC, consumption mix, at consumer, 230V IT S	Totale
	Non renewable, fossil	MJ	1.58397	0.000401129	0.0001531	0.0620298	0.00346823	0.0566579	0	0.141645	0.00117179	-0.0377719	-0.238319	0.174648	0.590263	2.33832	2.48755	PE-Nr		Non renewable, fossil	MJ	1.58397	0.000401129	0.0001531	0.0620298	0.00346823	0.0566579	0	1.41645	0.00117179	-0.0377719	-0.238319	0.174648	0.590263	3.61312	3.78905	PE-Nr
	Non-renewable, nuclear	MJ	0.0618382	3.37083e-05	1.62609e-05	0.00666582	0.0025944	0.00118525	0	0.00296313	0.000597702	-0.000790169	-0.00644737	0.0268626	0.0536274	0.149147				Non-renewable, nuclear	MJ	0.0618382	3.37083e-05	1.62609e-05	0.00666582	0.0025944	0.00118525	0	0.0296313	0.000597702	-0.000790169	-0.00644737	0.0268626	0.0536274	0.175815
	Non-renewable, biomass	MJ	2.59786e-05	1.30025e-07	5.79669e-08	2.95908e-05	2.80649e-07	1.46786e-06	0	3.66965e-06	8.8569e-08	-9.78575e-07	-4.07736e-06	2.72832e-05	0	8.34914e-05				Non-renewable, biomass	MJ	2.59786e-05	1.30025e-07	5.79669e-08	2.95908e-05	2.80649e-07	1.46786e-06	0	3.66965e-05	8.8569e-08	-9.78575e-07	-4.07736e-06	2.72832e-05	0	0.000116518
	Renewable, biomass	MJ	0.0307156	9.54816e-06	5.15515e-06	0.162616	0.000241421	0.000281919	0	0.000704799	6.34715e-05	-0.000187946	-0.00126301	0.0106926	0	0.203879	0.383989	PE-Re		Renewable, biomass	MJ	0.0307156	9.54816e-06	5.15515e-06	0.162616	0.000241421	0.000281919	0	0.00704799	6.34715e-05	-0.000187946	-0.00126301	0.0106926	0	0.210222	0.402708	PE-Re
	Renewable, wind, solar, geothe	MJ	0.00939979	3.75769e-06	1.3538e-06	0.000702067	0.000259901	0.00011831	0	0.000295775	6.06775e-05	-7.88732e-05	-0.000732319	0.0119045	0.0200632	0.0419981				Renewable, wind, solar, geothe	MJ	0.00939979	3.75769e-06	1.3538e-06	0.000702067	0.000259901	0.00011831	0	0.00295775	6.06775e-05	-7.88732e-05	-0.000732319	0.0119045	0.0200632	0.0446601
	Renewable, water	MJ	0.0514778	2.56538e-05	1.02732e-05	0.00226724	0.00048248	0.00043175	0	0.00107937	0.000113673	-0.000287833	-0.00279079	0.023599	0.0617028	0.138111				Renewable, water	MJ	0.0514778	2.56538e-05	1.02732e-05	0.00226724	0.00048248	0.00043175	0	0.0107937	0.000113673	-0.000287833	-0.00279079	0.023599	0.0617028	0.147826
	Calculation:	Analizza								Scenario SB-1A										Calculation:	Analizza								Scenario SB-1A
	Results:	Valutazione dell'impatto							Trasporto	RIF										Results:	Valutazione dell'impatto							Trasporto	RIF
	Product:	1 l 0. DELTA - Mortar {Europe without Switzerland}| production | APOS, U - A1-A5 (del progetto							Cemento	60										Product:	1 l 0. DELTA - Mortar {Europe without Switzerland}| production | APOS, U - A1-A5 (del progetto							Cemento	60
	Metodo:	Cumulative Energy Demand V1.11 / Cumulative energy demand							DELTA	53										Metodo:	Cumulative Energy Demand V1.11 / Cumulative energy demand							DELTA	53
	Indicatore:	Caratterizzazione								-										Indicatore:	Caratterizzazione								-
	Skip categories:	Mai								-										Skip categories:	Mai								-
	Esclude processi di infrastrutture:	No							Fabbrica-cantiere	50										Esclude processi di infrastrutture:	No							Fabbrica-cantiere	500
	Esclude le emissioni di lungo termine:	No								-										Esclude le emissioni di lungo termine:	No								-
	Sorted on item:	Categoria d'impatto																		Sorted on item:	Categoria d'impatto
	Sort order:	Ascendente																		Sort order:	Ascendente
	Categoria d'impatto	Unità	Cement, limestone 6-20% {RoW}| cement production, limestone 6-20% | Cut-off, U	Conveyor belt {GLO}| market for | APOS, U	Industrial machine, heavy, unspecified {RoW}| market for industrial machine, heavy, unspecified | APOS, U	Packing, cement {RoW}| processing | APOS, U	Rock crushing {RER}| processing | APOS, U	T. Cemento_ Transport, freight, lorry, unspecified {RER}| market for transport, freight, lorry, unspecified | APOS, U	T. DELTA _ Transport, freight, lorry, unspecified {RER}| market for transport, freight, lorry, unspecified | APOS, U	A4_ Transport, freight, lorry, unspecified {RER}| market for transport, freight, lorry, unspecified | APOS, U	A5 - Tap water {Europe without Switzerland}| market for | APOS, U	Benefici - Transport, freight, lorry, unspecified {RER}| market for transport, freight, lorry, unspecified | APOS, U	Benefici - Waste plastic, mixture {RoW}| treatment of waste plastic, mixture, sanitary landfill | APOS, U	Electricity, medium voltage {IT}| market for | APOS, U	A5 - Electricity grid mix, AC, consumption mix, at consumer, 230V IT S	Totale				Categoria d'impatto	Unità	Cement, limestone 6-20% {RoW}| cement production, limestone 6-20% | Cut-off, U	Conveyor belt {GLO}| market for | APOS, U	Industrial machine, heavy, unspecified {RoW}| market for industrial machine, heavy, unspecified | APOS, U	Packing, cement {RoW}| processing | APOS, U	Rock crushing {RER}| processing | APOS, U	T. Cemento_ Transport, freight, lorry, unspecified {RER}| market for transport, freight, lorry, unspecified | APOS, U	T. DELTA _ Transport, freight, lorry, unspecified {RER}| market for transport, freight, lorry, unspecified | APOS, U	A4_ Transport, freight, lorry, unspecified {RER}| market for transport, freight, lorry, unspecified | APOS, U	A5 - Tap water {Europe without Switzerland}| market for | APOS, U	Benefici - Transport, freight, lorry, unspecified {RER}| market for transport, freight, lorry, unspecified | APOS, U	Benefici - Waste plastic, mixture {RoW}| treatment of waste plastic, mixture, sanitary landfill | APOS, U	Electricity, medium voltage {IT}| market for | APOS, U	A5 - Electricity grid mix, AC, consumption mix, at consumer, 230V IT S	Totale
	Non renewable, fossil	MJ	1.58397	0.000401129	0.0001531	0.0620298	0.00346823	0.0566579	0.100096	0.141645	0.00117179	-0.0377719	-0.238319	0.174648	0.590263	2.43841	2.58974	PE-Nr		Non renewable, fossil	MJ	1.58397	0.000401129	0.0001531	0.0620298	0.00346823	0.0566579	0.100096	1.41645	0.00117179	-0.0377719	-0.238319	0.174648	0.590263	3.71322	3.89125	PE-Nr
	Non-renewable, nuclear	MJ	0.0618382	3.37083e-05	1.62609e-05	0.00666582	0.0025944	0.00118525	0.00209395	0.00296313	0.000597702	-0.000790169	-0.00644737	0.0268626	0.0536274	0.151241				Non-renewable, nuclear	MJ	0.0618382	3.37083e-05	1.62609e-05	0.00666582	0.0025944	0.00118525	0.00209395	0.0296313	0.000597702	-0.000790169	-0.00644737	0.0268626	0.0536274	0.177909
	Non-renewable, biomass	MJ	2.59786e-05	1.30025e-07	5.79669e-08	2.95908e-05	2.80649e-07	1.46786e-06	2.59322e-06	3.66965e-06	8.8569e-08	-9.78575e-07	-4.07736e-06	2.72832e-05	0	8.60847e-05				Non-renewable, biomass	MJ	2.59786e-05	1.30025e-07	5.79669e-08	2.95908e-05	2.80649e-07	1.46786e-06	2.59322e-06	3.66965e-05	8.8569e-08	-9.78575e-07	-4.07736e-06	2.72832e-05	0	0.000119112
	Renewable, biomass	MJ	0.0307156	9.54816e-06	5.15515e-06	0.162616	0.000241421	0.000281919	0.000498058	0.000704799	6.34715e-05	-0.000187946	-0.00126301	0.0106926	0	0.204377	0.385459	PE-Re		Renewable, biomass	MJ	0.0307156	9.54816e-06	5.15515e-06	0.162616	0.000241421	0.000281919	0.000498058	0.00704799	6.34715e-05	-0.000187946	-0.00126301	0.0106926	0	0.21072	0.404178	PE-Re
	Renewable, wind, solar, geothe	MJ	0.00939979	3.75769e-06	1.3538e-06	0.000702067	0.000259901	0.00011831	0.000209014	0.000295775	6.06775e-05	-7.88732e-05	-0.000732319	0.0119045	0.0200632	0.0422072				Renewable, wind, solar, geothe	MJ	0.00939979	3.75769e-06	1.3538e-06	0.000702067	0.000259901	0.00011831	0.000209014	0.00295775	6.06775e-05	-7.88732e-05	-0.000732319	0.0119045	0.0200632	0.0448691
	Renewable, water	MJ	0.0514778	2.56538e-05	1.02732e-05	0.00226724	0.00048248	0.00043175	0.000762758	0.00107937	0.000113673	-0.000287833	-0.00279079	0.023599	0.0617028	0.138874				Renewable, water	MJ	0.0514778	2.56538e-05	1.02732e-05	0.00226724	0.00048248	0.00043175	0.000762758	0.0107937	0.000113673	-0.000287833	-0.00279079	0.023599	0.0617028	0.148589
	Non rinnovabile	MJ	1.64584	0.000434967	0.000169419	0.0687252	0.0060629	0.0578446	0.102192	0.144612	0.00176958	-0.0385631	-0.24477	0.201537	0.64389	2.58974				Non rinnovabile	MJ	1.64584	0.000434967	0.000169419	0.0687252	0.0060629	0.0578446	0.102192	1.44612	0.00176958	-0.0385631	-0.24477	0.201537	0.64389	3.89125
	Rinnovabile	MJ	0.0915932	3.89597e-05	1.67822e-05	0.165585	0.000983802	0.000831979	0.00146983	0.00207995	0.000237822	-0.000554653	-0.00478612	0.0461961	0.0817661	0.385459				Rinnovabile	MJ	0.0915932	3.89597e-05	1.67822e-05	0.165585	0.000983802	0.000831979	0.00146983	0.0207995	0.000237822	-0.000554653	-0.00478612	0.0461961	0.0817661	0.404178
	Calculation:	Analizza																		Calculation:	Analizza
	Results:	Valutazione dell'impatto								Scenario SB-1A										Results:	Valutazione dell'impatto								Scenario SB-1A
	Product:	1 l 0. DELTA - Mortar {Europe without Switzerland}| production | APOS, U - A1-A5 (del progetto							Trasporto	RIF										Product:	1 l 0. DELTA - Mortar {Europe without Switzerland}| production | APOS, U - A1-A5 (del progetto							Trasporto	RIF
	Metodo:	Cumulative Energy Demand V1.11 / Cumulative energy demand							Cemento	60										Metodo:	Cumulative Energy Demand V1.11 / Cumulative energy demand							Cemento	60
	Indicatore:	Caratterizzazione							DELTA	100										Indicatore:	Caratterizzazione							DELTA	100
	Skip categories:	Mai								-										Skip categories:	Mai								-
	Esclude processi di infrastrutture:	No								-										Esclude processi di infrastrutture:	No								-
	Esclude le emissioni di lungo termine:	No							Fabbrica-cantiere	50										Esclude le emissioni di lungo termine:	No							Fabbrica-cantiere	500
	Sorted on item:	Categoria d'impatto								-										Sorted on item:	Categoria d'impatto								-
	Sort order:	Ascendente																		Sort order:	Ascendente
	Categoria d'impatto	Unità	Cement, limestone 6-20% {RoW}| cement production, limestone 6-20% | Cut-off, U	Conveyor belt {GLO}| market for | APOS, U	Industrial machine, heavy, unspecified {RoW}| market for industrial machine, heavy, unspecified | APOS, U	Packing, cement {RoW}| processing | APOS, U	Rock crushing {RER}| processing | APOS, U	T. Cemento_ Transport, freight, lorry, unspecified {RER}| market for transport, freight, lorry, unspecified | APOS, U	T. DELTA _ Transport, freight, lorry, unspecified {RER}| market for transport, freight, lorry, unspecified | APOS, U	A4_ Transport, freight, lorry, unspecified {RER}| market for transport, freight, lorry, unspecified | APOS, U	A5 - Tap water {Europe without Switzerland}| market for | APOS, U	Benefici - Transport, freight, lorry, unspecified {RER}| market for transport, freight, lorry, unspecified | APOS, U	Benefici - Waste plastic, mixture {RoW}| treatment of waste plastic, mixture, sanitary landfill | APOS, U	Electricity, medium voltage {IT}| market for | APOS, U	A5 - Electricity grid mix, AC, consumption mix, at consumer, 230V IT S	Totale				Categoria d'impatto	Unità	Cement, limestone 6-20% {RoW}| cement production, limestone 6-20% | Cut-off, U	Conveyor belt {GLO}| market for | APOS, U	Industrial machine, heavy, unspecified {RoW}| market for industrial machine, heavy, unspecified | APOS, U	Packing, cement {RoW}| processing | APOS, U	Rock crushing {RER}| processing | APOS, U	T. Cemento_ Transport, freight, lorry, unspecified {RER}| market for transport, freight, lorry, unspecified | APOS, U	T. DELTA _ Transport, freight, lorry, unspecified {RER}| market for transport, freight, lorry, unspecified | APOS, U	A4_ Transport, freight, lorry, unspecified {RER}| market for transport, freight, lorry, unspecified | APOS, U	A5 - Tap water {Europe without Switzerland}| market for | APOS, U	Benefici - Transport, freight, lorry, unspecified {RER}| market for transport, freight, lorry, unspecified | APOS, U	Benefici - Waste plastic, mixture {RoW}| treatment of waste plastic, mixture, sanitary landfill | APOS, U	Electricity, medium voltage {IT}| market for | APOS, U	A5 - Electricity grid mix, AC, consumption mix, at consumer, 230V IT S	Totale
	Non renewable, fossil	MJ	1.58397	0.000401129	0.0001531	0.0620298	0.00346823	0.0566579	0.18886	0.141645	0.00117179	-0.0377719	-0.238319	0.174648	0.590263	2.52718	2.68037	PE-Nr		Non renewable, fossil	MJ	1.58397	0.000401129	0.0001531	0.0620298	0.00346823	0.0566579	0.18886	1.41645	0.00117179	-0.0377719	-0.238319	0.174648	0.590263	3.80198	3.98187	PE-Nr
	Non-renewable, nuclear	MJ	0.0618382	3.37083e-05	1.62609e-05	0.00666582	0.0025944	0.00118525	0.00395084	0.00296313	0.000597702	-0.000790169	-0.00644737	0.0268626	0.0536274	0.153098				Non-renewable, nuclear	MJ	0.0618382	3.37083e-05	1.62609e-05	0.00666582	0.0025944	0.00118525	0.00395084	0.0296313	0.000597702	-0.000790169	-0.00644737	0.0268626	0.0536274	0.179766
	Non-renewable, biomass	MJ	2.59786e-05	1.30025e-07	5.79669e-08	2.95908e-05	2.80649e-07	1.46786e-06	4.89287e-06	3.66965e-06	8.8569e-08	-9.78575e-07	-4.07736e-06	2.72832e-05	0	8.83843e-05				Non-renewable, biomass	MJ	2.59786e-05	1.30025e-07	5.79669e-08	2.95908e-05	2.80649e-07	1.46786e-06	4.89287e-06	3.66965e-05	8.8569e-08	-9.78575e-07	-4.07736e-06	2.72832e-05	0	0.000121411
	Renewable, biomass	MJ	0.0307156	9.54816e-06	5.15515e-06	0.162616	0.000241421	0.000281919	0.000939731	0.000704799	6.34715e-05	-0.000187946	-0.00126301	0.0106926	0	0.204819	0.386762	PE-Re		Renewable, biomass	MJ	0.0307156	9.54816e-06	5.15515e-06	0.162616	0.000241421	0.000281919	0.000939731	0.00704799	6.34715e-05	-0.000187946	-0.00126301	0.0106926	0	0.211162	0.405482	PE-Re
	Renewable, wind, solar, geothe	MJ	0.00939979	3.75769e-06	1.3538e-06	0.000702067	0.000259901	0.00011831	0.000394366	0.000295775	6.06775e-05	-7.88732e-05	-0.000732319	0.0119045	0.0200632	0.0423925				Renewable, wind, solar, geothe	MJ	0.00939979	3.75769e-06	1.3538e-06	0.000702067	0.000259901	0.00011831	0.000394366	0.00295775	6.06775e-05	-7.88732e-05	-0.000732319	0.0119045	0.0200632	0.0450545
	Renewable, water	MJ	0.0514778	2.56538e-05	1.02732e-05	0.00226724	0.00048248	0.00043175	0.00143917	0.00107937	0.000113673	-0.000287833	-0.00279079	0.023599	0.0617028	0.139551				Renewable, water	MJ	0.0514778	2.56538e-05	1.02732e-05	0.00226724	0.00048248	0.00043175	0.00143917	0.0107937	0.000113673	-0.000287833	-0.00279079	0.023599	0.0617028	0.149265
	Calculation:	Analizza								Scenario SB-1A										Calculation:	Analizza								Scenario SB-1A
	Results:	Valutazione dell'impatto							Trasporto	RIF										Results:	Valutazione dell'impatto							Trasporto	RIF
	Product:	1 l 0. DELTA - Mortar {Europe without Switzerland}| production | APOS, U - A1-A5 (del progetto							Cemento	60										Product:	1 l 0. DELTA - Mortar {Europe without Switzerland}| production | APOS, U - A1-A5 (del progetto							Cemento	60
	Metodo:	Cumulative Energy Demand V1.11 / Cumulative energy demand							DELTA	200										Metodo:	Cumulative Energy Demand V1.11 / Cumulative energy demand							DELTA	200
	Indicatore:	Caratterizzazione								-										Indicatore:	Caratterizzazione								-
	Skip categories:	Mai								-										Skip categories:	Mai								-
	Esclude processi di infrastrutture:	No							Fabbrica-cantiere	50										Esclude processi di infrastrutture:	No							Fabbrica-cantiere	500
	Esclude le emissioni di lungo termine:	No								-										Esclude le emissioni di lungo termine:	No								-
	Sorted on item:	Categoria d'impatto																		Sorted on item:	Categoria d'impatto
	Sort order:	Ascendente																		Sort order:	Ascendente
	Categoria d'impatto	Unità	Cement, limestone 6-20% {RoW}| cement production, limestone 6-20% | Cut-off, U	Conveyor belt {GLO}| market for | APOS, U	Industrial machine, heavy, unspecified {RoW}| market for industrial machine, heavy, unspecified | APOS, U	Packing, cement {RoW}| processing | APOS, U	Rock crushing {RER}| processing | APOS, U	T. Cemento_ Transport, freight, lorry, unspecified {RER}| market for transport, freight, lorry, unspecified | APOS, U	T. DELTA _ Transport, freight, lorry, unspecified {RER}| market for transport, freight, lorry, unspecified | APOS, U	A4_ Transport, freight, lorry, unspecified {RER}| market for transport, freight, lorry, unspecified | APOS, U	A5 - Tap water {Europe without Switzerland}| market for | APOS, U	Benefici - Transport, freight, lorry, unspecified {RER}| market for transport, freight, lorry, unspecified | APOS, U	Benefici - Waste plastic, mixture {RoW}| treatment of waste plastic, mixture, sanitary landfill | APOS, U	Electricity, medium voltage {IT}| market for | APOS, U	A5 - Electricity grid mix, AC, consumption mix, at consumer, 230V IT S	Totale				Categoria d'impatto	Unità	Cement, limestone 6-20% {RoW}| cement production, limestone 6-20% | Cut-off, U	Conveyor belt {GLO}| market for | APOS, U	Industrial machine, heavy, unspecified {RoW}| market for industrial machine, heavy, unspecified | APOS, U	Packing, cement {RoW}| processing | APOS, U	Rock crushing {RER}| processing | APOS, U	T. Cemento_ Transport, freight, lorry, unspecified {RER}| market for transport, freight, lorry, unspecified | APOS, U	T. DELTA _ Transport, freight, lorry, unspecified {RER}| market for transport, freight, lorry, unspecified | APOS, U	A4_ Transport, freight, lorry, unspecified {RER}| market for transport, freight, lorry, unspecified | APOS, U	A5 - Tap water {Europe without Switzerland}| market for | APOS, U	Benefici - Transport, freight, lorry, unspecified {RER}| market for transport, freight, lorry, unspecified | APOS, U	Benefici - Waste plastic, mixture {RoW}| treatment of waste plastic, mixture, sanitary landfill | APOS, U	Electricity, medium voltage {IT}| market for | APOS, U	A5 - Electricity grid mix, AC, consumption mix, at consumer, 230V IT S	Totale
	Non renewable, fossil	MJ	1.58397	0.000401129	0.0001531	0.0620298	0.00346823	0.0566579	0.377719	0.141645	0.00117179	-0.0377719	-0.238319	0.174648	0.590263	2.71604	2.87318	PE-Nr		Non renewable, fossil	MJ	1.58397	0.000401129	0.0001531	0.0620298	0.00346823	0.0566579	0.377719	1.41645	0.00117179	-0.0377719	-0.238319	0.174648	0.590263	3.99084	4.17468	PE-Nr
	Non-renewable, nuclear	MJ	0.0618382	3.37083e-05	1.62609e-05	0.00666582	0.0025944	0.00118525	0.00790169	0.00296313	0.000597702	-0.000790169	-0.00644737	0.0268626	0.0536274	0.157049				Non-renewable, nuclear	MJ	0.0618382	3.37083e-05	1.62609e-05	0.00666582	0.0025944	0.00118525	0.00790169	0.0296313	0.000597702	-0.000790169	-0.00644737	0.0268626	0.0536274	0.183717
	Non-renewable, biomass	MJ	2.59786e-05	1.30025e-07	5.79669e-08	2.95908e-05	2.80649e-07	1.46786e-06	9.78575e-06	3.66965e-06	8.8569e-08	-9.78575e-07	-4.07736e-06	2.72832e-05	0	9.32772e-05				Non-renewable, biomass	MJ	2.59786e-05	1.30025e-07	5.79669e-08	2.95908e-05	2.80649e-07	1.46786e-06	9.78575e-06	3.66965e-05	8.8569e-08	-9.78575e-07	-4.07736e-06	2.72832e-05	0	0.000126304
	Renewable, biomass	MJ	0.0307156	9.54816e-06	5.15515e-06	0.162616	0.000241421	0.000281919	0.00187946	0.000704799	6.34715e-05	-0.000187946	-0.00126301	0.0106926	0	0.205759	0.389535	PE-Re		Renewable, biomass	MJ	0.0307156	9.54816e-06	5.15515e-06	0.162616	0.000241421	0.000281919	0.00187946	0.00704799	6.34715e-05	-0.000187946	-0.00126301	0.0106926	0	0.212102	0.408255	PE-Re
	Renewable, wind, solar, geothe	MJ	0.00939979	3.75769e-06	1.3538e-06	0.000702067	0.000259901	0.00011831	0.000788732	0.000295775	6.06775e-05	-7.88732e-05	-0.000732319	0.0119045	0.0200632	0.0427869				Renewable, wind, solar, geothe	MJ	0.00939979	3.75769e-06	1.3538e-06	0.000702067	0.000259901	0.00011831	0.000788732	0.00295775	6.06775e-05	-7.88732e-05	-0.000732319	0.0119045	0.0200632	0.0454489
	Renewable, water	MJ	0.0514778	2.56538e-05	1.02732e-05	0.00226724	0.00048248	0.00043175	0.00287833	0.00107937	0.000113673	-0.000287833	-0.00279079	0.023599	0.0617028	0.14099				Renewable, water	MJ	0.0514778	2.56538e-05	1.02732e-05	0.00226724	0.00048248	0.00043175	0.00287833	0.0107937	0.000113673	-0.000287833	-0.00279079	0.023599	0.0617028	0.150704
	Calculation:	Analizza								Scenario SB-1A										Calculation:	Analizza								Scenario SB-1A
	Results:	Valutazione dell'impatto							Trasporto	RIF										Results:	Valutazione dell'impatto							Trasporto	RIF
	Product:	1 l 0. DELTA - Mortar {Europe without Switzerland}| production | APOS, U - A1-A5 (del progetto							Cemento	60										Product:	1 l 0. DELTA - Mortar {Europe without Switzerland}| production | APOS, U - A1-A5 (del progetto							Cemento	60
	Metodo:	Cumulative Energy Demand V1.11 / Cumulative energy demand							DELTA	300										Metodo:	Cumulative Energy Demand V1.11 / Cumulative energy demand							DELTA	300
	Indicatore:	Caratterizzazione								-										Indicatore:	Caratterizzazione								-
	Skip categories:	Mai								-										Skip categories:	Mai								-
	Esclude processi di infrastrutture:	No							Fabbrica-cantiere	50										Esclude processi di infrastrutture:	No							Fabbrica-cantiere	500
	Esclude le emissioni di lungo termine:	No								-										Esclude le emissioni di lungo termine:	No								-
	Sorted on item:	Categoria d'impatto																		Sorted on item:	Categoria d'impatto
	Sort order:	Ascendente																		Sort order:	Ascendente
	Categoria d'impatto	Unità	Cement, limestone 6-20% {RoW}| cement production, limestone 6-20% | Cut-off, U	Conveyor belt {GLO}| market for | APOS, U	Industrial machine, heavy, unspecified {RoW}| market for industrial machine, heavy, unspecified | APOS, U	Packing, cement {RoW}| processing | APOS, U	Rock crushing {RER}| processing | APOS, U	T. Cemento_ Transport, freight, lorry, unspecified {RER}| market for transport, freight, lorry, unspecified | APOS, U	T. DELTA _ Transport, freight, lorry, unspecified {RER}| market for transport, freight, lorry, unspecified | APOS, U	A4_ Transport, freight, lorry, unspecified {RER}| market for transport, freight, lorry, unspecified | APOS, U	A5 - Tap water {Europe without Switzerland}| market for | APOS, U	Benefici - Transport, freight, lorry, unspecified {RER}| market for transport, freight, lorry, unspecified | APOS, U	Benefici - Waste plastic, mixture {RoW}| treatment of waste plastic, mixture, sanitary landfill | APOS, U	Electricity, medium voltage {IT}| market for | APOS, U	A5 - Electricity grid mix, AC, consumption mix, at consumer, 230V IT S	Totale				Categoria d'impatto	Unità	Cement, limestone 6-20% {RoW}| cement production, limestone 6-20% | Cut-off, U	Conveyor belt {GLO}| market for | APOS, U	Industrial machine, heavy, unspecified {RoW}| market for industrial machine, heavy, unspecified | APOS, U	Packing, cement {RoW}| processing | APOS, U	Rock crushing {RER}| processing | APOS, U	T. Cemento_ Transport, freight, lorry, unspecified {RER}| market for transport, freight, lorry, unspecified | APOS, U	T. DELTA _ Transport, freight, lorry, unspecified {RER}| market for transport, freight, lorry, unspecified | APOS, U	A4_ Transport, freight, lorry, unspecified {RER}| market for transport, freight, lorry, unspecified | APOS, U	A5 - Tap water {Europe without Switzerland}| market for | APOS, U	Benefici - Transport, freight, lorry, unspecified {RER}| market for transport, freight, lorry, unspecified | APOS, U	Benefici - Waste plastic, mixture {RoW}| treatment of waste plastic, mixture, sanitary landfill | APOS, U	Electricity, medium voltage {IT}| market for | APOS, U	A5 - Electricity grid mix, AC, consumption mix, at consumer, 230V IT S	Totale
	Non renewable, fossil	MJ	1.58397	0.000401129	0.0001531	0.0620298	0.00346823	0.0566579	0.566579	0.141645	0.00117179	-0.0377719	-0.238319	0.174648	0.590263	2.9049	3.066	PE-Nr		Non renewable, fossil	MJ	1.58397	0.000401129	0.0001531	0.0620298	0.00346823	0.0566579	0.566579	1.41645	0.00117179	-0.0377719	-0.238319	0.174648	0.590263	4.1797	4.3675	PE-Nr
	Non-renewable, nuclear	MJ	0.0618382	3.37083e-05	1.62609e-05	0.00666582	0.0025944	0.00118525	0.0118525	0.00296313	0.000597702	-0.000790169	-0.00644737	0.0268626	0.0536274	0.160999				Non-renewable, nuclear	MJ	0.0618382	3.37083e-05	1.62609e-05	0.00666582	0.0025944	0.00118525	0.0118525	0.0296313	0.000597702	-0.000790169	-0.00644737	0.0268626	0.0536274	0.187668
	Non-renewable, biomass	MJ	2.59786e-05	1.30025e-07	5.79669e-08	2.95908e-05	2.80649e-07	1.46786e-06	1.46786e-05	3.66965e-06	8.8569e-08	-9.78575e-07	-4.07736e-06	2.72832e-05	0	9.81701e-05				Non-renewable, biomass	MJ	2.59786e-05	1.30025e-07	5.79669e-08	2.95908e-05	2.80649e-07	1.46786e-06	1.46786e-05	3.66965e-05	8.8569e-08	-9.78575e-07	-4.07736e-06	2.72832e-05	0	0.000131197
	Renewable, biomass	MJ	0.0307156	9.54816e-06	5.15515e-06	0.162616	0.000241421	0.000281919	0.00281919	0.000704799	6.34715e-05	-0.000187946	-0.00126301	0.0106926	0	0.206698	0.392309	PE-Re		Renewable, biomass	MJ	0.0307156	9.54816e-06	5.15515e-06	0.162616	0.000241421	0.000281919	0.00281919	0.00704799	6.34715e-05	-0.000187946	-0.00126301	0.0106926	0	0.213042	0.411028	PE-Re
	Renewable, wind, solar, geothe	MJ	0.00939979	3.75769e-06	1.3538e-06	0.000702067	0.000259901	0.00011831	0.0011831	0.000295775	6.06775e-05	-7.88732e-05	-0.000732319	0.0119045	0.0200632	0.0431812				Renewable, wind, solar, geothe	MJ	0.00939979	3.75769e-06	1.3538e-06	0.000702067	0.000259901	0.00011831	0.0011831	0.00295775	6.06775e-05	-7.88732e-05	-0.000732319	0.0119045	0.0200632	0.0458432
	Renewable, water	MJ	0.0514778	2.56538e-05	1.02732e-05	0.00226724	0.00048248	0.00043175	0.0043175	0.00107937	0.000113673	-0.000287833	-0.00279079	0.023599	0.0617028	0.142429				Renewable, water	MJ	0.0514778	2.56538e-05	1.02732e-05	0.00226724	0.00048248	0.00043175	0.0043175	0.0107937	0.000113673	-0.000287833	-0.00279079	0.023599	0.0617028	0.152143
	Calculation:	Analizza								Scenario SB-1A										Calculation:	Analizza								Scenario SB-1A
	Results:	Valutazione dell'impatto							Trasporto	RIF										Results:	Valutazione dell'impatto							Trasporto	RIF
	Product:	1 l 0. DELTA - Mortar {Europe without Switzerland}| production | APOS, U - A1-A5 (del progetto							Cemento	60										Product:	1 l 0. DELTA - Mortar {Europe without Switzerland}| production | APOS, U - A1-A5 (del progetto							Cemento	60
	Metodo:	Cumulative Energy Demand V1.11 / Cumulative energy demand							DELTA	400										Metodo:	Cumulative Energy Demand V1.11 / Cumulative energy demand							DELTA	400
	Indicatore:	Caratterizzazione								-										Indicatore:	Caratterizzazione								-
	Skip categories:	Mai								-										Skip categories:	Mai								-
	Esclude processi di infrastrutture:	No							Fabbrica-cantiere	50										Esclude processi di infrastrutture:	No							Fabbrica-cantiere	500
	Esclude le emissioni di lungo termine:	No								-										Esclude le emissioni di lungo termine:	No								-
	Sorted on item:	Categoria d'impatto																		Sorted on item:	Categoria d'impatto
	Sort order:	Ascendente																		Sort order:	Ascendente
	Categoria d'impatto	Unità	Cement, limestone 6-20% {RoW}| cement production, limestone 6-20% | Cut-off, U	Conveyor belt {GLO}| market for | APOS, U	Industrial machine, heavy, unspecified {RoW}| market for industrial machine, heavy, unspecified | APOS, U	Packing, cement {RoW}| processing | APOS, U	Rock crushing {RER}| processing | APOS, U	T. Cemento_ Transport, freight, lorry, unspecified {RER}| market for transport, freight, lorry, unspecified | APOS, U	T. DELTA _ Transport, freight, lorry, unspecified {RER}| market for transport, freight, lorry, unspecified | APOS, U	A4_ Transport, freight, lorry, unspecified {RER}| market for transport, freight, lorry, unspecified | APOS, U	A5 - Tap water {Europe without Switzerland}| market for | APOS, U	Benefici - Transport, freight, lorry, unspecified {RER}| market for transport, freight, lorry, unspecified | APOS, U	Benefici - Waste plastic, mixture {RoW}| treatment of waste plastic, mixture, sanitary landfill | APOS, U	Electricity, medium voltage {IT}| market for | APOS, U	A5 - Electricity grid mix, AC, consumption mix, at consumer, 230V IT S	Totale				Categoria d'impatto	Unità	Cement, limestone 6-20% {RoW}| cement production, limestone 6-20% | Cut-off, U	Conveyor belt {GLO}| market for | APOS, U	Industrial machine, heavy, unspecified {RoW}| market for industrial machine, heavy, unspecified | APOS, U	Packing, cement {RoW}| processing | APOS, U	Rock crushing {RER}| processing | APOS, U	T. Cemento_ Transport, freight, lorry, unspecified {RER}| market for transport, freight, lorry, unspecified | APOS, U	T. DELTA _ Transport, freight, lorry, unspecified {RER}| market for transport, freight, lorry, unspecified | APOS, U	A4_ Transport, freight, lorry, unspecified {RER}| market for transport, freight, lorry, unspecified | APOS, U	A5 - Tap water {Europe without Switzerland}| market for | APOS, U	Benefici - Transport, freight, lorry, unspecified {RER}| market for transport, freight, lorry, unspecified | APOS, U	Benefici - Waste plastic, mixture {RoW}| treatment of waste plastic, mixture, sanitary landfill | APOS, U	Electricity, medium voltage {IT}| market for | APOS, U	A5 - Electricity grid mix, AC, consumption mix, at consumer, 230V IT S	Totale
	Non renewable, fossil	MJ	1.58397	0.000401129	0.0001531	0.0620298	0.00346823	0.0566579	0.755438	0.141645	0.00117179	-0.0377719	-0.238319	0.174648	0.590263	3.09376	3.25881	PE-Nr		Non renewable, fossil	MJ	1.58397	0.000401129	0.0001531	0.0620298	0.00346823	0.0566579	0.755438	1.41645	0.00117179	-0.0377719	-0.238319	0.174648	0.590263	4.36856	4.56031	PE-Nr
	Non-renewable, nuclear	MJ	0.0618382	3.37083e-05	1.62609e-05	0.00666582	0.0025944	0.00118525	0.0158034	0.00296313	0.000597702	-0.000790169	-0.00644737	0.0268626	0.0536274	0.16495				Non-renewable, nuclear	MJ	0.0618382	3.37083e-05	1.62609e-05	0.00666582	0.0025944	0.00118525	0.0158034	0.0296313	0.000597702	-0.000790169	-0.00644737	0.0268626	0.0536274	0.191618
	Non-renewable, biomass	MJ	2.59786e-05	1.30025e-07	5.79669e-08	2.95908e-05	2.80649e-07	1.46786e-06	1.95715e-05	3.66965e-06	8.8569e-08	-9.78575e-07	-4.07736e-06	2.72832e-05	0	0.000103063				Non-renewable, biomass	MJ	2.59786e-05	1.30025e-07	5.79669e-08	2.95908e-05	2.80649e-07	1.46786e-06	1.95715e-05	3.66965e-05	8.8569e-08	-9.78575e-07	-4.07736e-06	2.72832e-05	0	0.00013609
	Renewable, biomass	MJ	0.0307156	9.54816e-06	5.15515e-06	0.162616	0.000241421	0.000281919	0.00375893	0.000704799	6.34715e-05	-0.000187946	-0.00126301	0.0106926	0	0.207638	0.395082	PE-Re		Renewable, biomass	MJ	0.0307156	9.54816e-06	5.15515e-06	0.162616	0.000241421	0.000281919	0.00375893	0.00704799	6.34715e-05	-0.000187946	-0.00126301	0.0106926	0	0.213981	0.413801	PE-Re
	Renewable, wind, solar, geothe	MJ	0.00939979	3.75769e-06	1.3538e-06	0.000702067	0.000259901	0.00011831	0.00157746	0.000295775	6.06775e-05	-7.88732e-05	-0.000732319	0.0119045	0.0200632	0.0435756				Renewable, wind, solar, geothe	MJ	0.00939979	3.75769e-06	1.3538e-06	0.000702067	0.000259901	0.00011831	0.00157746	0.00295775	6.06775e-05	-7.88732e-05	-0.000732319	0.0119045	0.0200632	0.0462376
	Renewable, water	MJ	0.0514778	2.56538e-05	1.02732e-05	0.00226724	0.00048248	0.00043175	0.00575666	0.00107937	0.000113673	-0.000287833	-0.00279079	0.023599	0.0617028	0.143868				Renewable, water	MJ	0.0514778	2.56538e-05	1.02732e-05	0.00226724	0.00048248	0.00043175	0.00575666	0.0107937	0.000113673	-0.000287833	-0.00279079	0.023599	0.0617028	0.153583
	Calculation:	Analizza								Scenario SB-1A										Calculation:	Analizza								Scenario SB-1A
	Results:	Valutazione dell'impatto							Trasporto	RIF										Results:	Valutazione dell'impatto							Trasporto	RIF
	Product:	1 l 0. DELTA - Mortar {Europe without Switzerland}| production | APOS, U - A1-A5 (del progetto							Cemento	60										Product:	1 l 0. DELTA - Mortar {Europe without Switzerland}| production | APOS, U - A1-A5 (del progetto							Cemento	60
	Metodo:	Cumulative Energy Demand V1.11 / Cumulative energy demand							DELTA	500										Metodo:	Cumulative Energy Demand V1.11 / Cumulative energy demand							DELTA	500
	Indicatore:	Caratterizzazione								-										Indicatore:	Caratterizzazione								-
	Skip categories:	Mai								-										Skip categories:	Mai								-
	Esclude processi di infrastrutture:	No							Fabbrica-cantiere	50										Esclude processi di infrastrutture:	No							Fabbrica-cantiere	500
	Esclude le emissioni di lungo termine:	No								-										Esclude le emissioni di lungo termine:	No								-
	Sorted on item:	Categoria d'impatto																		Sorted on item:	Categoria d'impatto
	Sort order:	Ascendente																		Sort order:	Ascendente
	Categoria d'impatto	Unità	Cement, limestone 6-20% {RoW}| cement production, limestone 6-20% | Cut-off, U	Conveyor belt {GLO}| market for | APOS, U	Industrial machine, heavy, unspecified {RoW}| market for industrial machine, heavy, unspecified | APOS, U	Packing, cement {RoW}| processing | APOS, U	Rock crushing {RER}| processing | APOS, U	T. Cemento_ Transport, freight, lorry, unspecified {RER}| market for transport, freight, lorry, unspecified | APOS, U	T. DELTA _ Transport, freight, lorry, unspecified {RER}| market for transport, freight, lorry, unspecified | APOS, U	A4_ Transport, freight, lorry, unspecified {RER}| market for transport, freight, lorry, unspecified | APOS, U	A5 - Tap water {Europe without Switzerland}| market for | APOS, U	Benefici - Transport, freight, lorry, unspecified {RER}| market for transport, freight, lorry, unspecified | APOS, U	Benefici - Waste plastic, mixture {RoW}| treatment of waste plastic, mixture, sanitary landfill | APOS, U	Electricity, medium voltage {IT}| market for | APOS, U	A5 - Electricity grid mix, AC, consumption mix, at consumer, 230V IT S	Totale				Categoria d'impatto	Unità	Cement, limestone 6-20% {RoW}| cement production, limestone 6-20% | Cut-off, U	Conveyor belt {GLO}| market for | APOS, U	Industrial machine, heavy, unspecified {RoW}| market for industrial machine, heavy, unspecified | APOS, U	Packing, cement {RoW}| processing | APOS, U	Rock crushing {RER}| processing | APOS, U	T. Cemento_ Transport, freight, lorry, unspecified {RER}| market for transport, freight, lorry, unspecified | APOS, U	T. DELTA _ Transport, freight, lorry, unspecified {RER}| market for transport, freight, lorry, unspecified | APOS, U	A4_ Transport, freight, lorry, unspecified {RER}| market for transport, freight, lorry, unspecified | APOS, U	A5 - Tap water {Europe without Switzerland}| market for | APOS, U	Benefici - Transport, freight, lorry, unspecified {RER}| market for transport, freight, lorry, unspecified | APOS, U	Benefici - Waste plastic, mixture {RoW}| treatment of waste plastic, mixture, sanitary landfill | APOS, U	Electricity, medium voltage {IT}| market for | APOS, U	A5 - Electricity grid mix, AC, consumption mix, at consumer, 230V IT S	Totale
	Non renewable, fossil	MJ	1.58397	0.000401129	0.0001531	0.0620298	0.00346823	0.0566579	0.944298	0.141645	0.00117179	-0.0377719	-0.238319	0.174648	0.590263	3.28262	3.45163	PE-Nr		Non renewable, fossil	MJ	1.58397	0.000401129	0.0001531	0.0620298	0.00346823	0.0566579	0.944298	1.41645	0.00117179	-0.0377719	-0.238319	0.174648	0.590263	4.55742	4.75313	PE-Nr
	Non-renewable, nuclear	MJ	0.0618382	3.37083e-05	1.62609e-05	0.00666582	0.0025944	0.00118525	0.0197542	0.00296313	0.000597702	-0.000790169	-0.00644737	0.0268626	0.0536274	0.168901				Non-renewable, nuclear	MJ	0.0618382	3.37083e-05	1.62609e-05	0.00666582	0.0025944	0.00118525	0.0197542	0.0296313	0.000597702	-0.000790169	-0.00644737	0.0268626	0.0536274	0.195569
	Non-renewable, biomass	MJ	2.59786e-05	1.30025e-07	5.79669e-08	2.95908e-05	2.80649e-07	1.46786e-06	2.44644e-05	3.66965e-06	8.8569e-08	-9.78575e-07	-4.07736e-06	2.72832e-05	0	0.000107956				Non-renewable, biomass	MJ	2.59786e-05	1.30025e-07	5.79669e-08	2.95908e-05	2.80649e-07	1.46786e-06	2.44644e-05	3.66965e-05	8.8569e-08	-9.78575e-07	-4.07736e-06	2.72832e-05	0	0.000140983
	Renewable, biomass	MJ	0.0307156	9.54816e-06	5.15515e-06	0.162616	0.000241421	0.000281919	0.00469866	0.000704799	6.34715e-05	-0.000187946	-0.00126301	0.0106926	0	0.208578	0.397855	PE-Re		Renewable, biomass	MJ	0.0307156	9.54816e-06	5.15515e-06	0.162616	0.000241421	0.000281919	0.00469866	0.00704799	6.34715e-05	-0.000187946	-0.00126301	0.0106926	0	0.214921	0.416575	PE-Re
	Renewable, wind, solar, geothe	MJ	0.00939979	3.75769e-06	1.3538e-06	0.000702067	0.000259901	0.00011831	0.00197183	0.000295775	6.06775e-05	-7.88732e-05	-0.000732319	0.0119045	0.0200632	0.04397				Renewable, wind, solar, geothe	MJ	0.00939979	3.75769e-06	1.3538e-06	0.000702067	0.000259901	0.00011831	0.00197183	0.00295775	6.06775e-05	-7.88732e-05	-0.000732319	0.0119045	0.0200632	0.046632
	Renewable, water	MJ	0.0514778	2.56538e-05	1.02732e-05	0.00226724	0.00048248	0.00043175	0.00719583	0.00107937	0.000113673	-0.000287833	-0.00279079	0.023599	0.0617028	0.145307				Renewable, water	MJ	0.0514778	2.56538e-05	1.02732e-05	0.00226724	0.00048248	0.00043175	0.00719583	0.0107937	0.000113673	-0.000287833	-0.00279079	0.023599	0.0617028	0.155022

## Sheet: HP
	Calculation:	Analizza																		Calculation:	Analizza
	Results:	Valutazione dell'impatto								HP (SB) - A										Results:	Valutazione dell'impatto								HP (SB) - A
	Product:	1 l 0. HP - Mortar {Europe without Switzerland}| production | APOS, U - A1-A5 (del progetto							Cemento	60										Product:	1 l 0. HP - Mortar {Europe without Switzerland}| production | APOS, U - A1-A5 (del progetto							Cemento	60
	Metodo:	EN 15804 +A2 Method V1.00 / EF 3.0 normalization and weighting set							sabbia	0										Metodo:	EN 15804 +A2 Method V1.00 / EF 3.0 normalization and weighting set							sabbia	0
	Indicatore:	Caratterizzazione								-										Indicatore:	Caratterizzazione								-
	Skip categories:	Mai							Hp	150										Skip categories:	Mai							Hp	150
	Esclude processi di infrastrutture:	No							A4	50										Esclude processi di infrastrutture:	No							A4	500
	Esclude le emissioni di lungo termine:	No								-										Esclude le emissioni di lungo termine:	No								-
	Sorted on item:	Categoria d'impatto																		Sorted on item:	Categoria d'impatto
	Sort order:	Ascendente																		Sort order:	Ascendente
	1 l 0. HP - Mortar {Europe without Switzerland}| production | APOS, U - A1-A5 (del progetto		A1		A2			A3					A4	A5		BENEFICI		TOT		1 l 0. HP - Mortar {Europe without Switzerland}| production | APOS, U - A1-A5 (del progetto		A1		A2			A3					A4	A5		BENEFICI		TOT
	Categoria d'impatto	Unità	Cement, limestone 6-20% {RoW}| cement production, limestone 6-20% | Cut-off, U	Sand 0/2 mm, wet and dry quarry, production mix, at plant, undried RER S -	T. Cemento_ Transport, freight, lorry, unspecified {RER}| market for transport, freight, lorry, unspecified | APOS, U	T. Sabbia_ Transport, freight, lorry, unspecified {RER}| market for transport, freight, lorry, unspecified | APOS, U	T. HP _ Transport, freight, lorry, unspecified {RER}| market for transport, freight, lorry, unspecified | APOS, U	Conveyor belt {GLO}| market for | APOS, U	Industrial machine, heavy, unspecified {RoW}| market for industrial machine, heavy, unspecified | APOS, U	Packing, cement {RoW}| processing | APOS, U	Rock crushing {RER}| processing | APOS, U	Electricity, medium voltage {IT}| market for | APOS, U	A4_ Transport, freight, lorry, unspecified {RER}| market for transport, freight, lorry, unspecified | APOS, U	A5 - Tap water {Europe without Switzerland}| market for | APOS, U	A5 - Electricity grid mix, AC, consumption mix, at consumer, 230V IT S	Benefici - Transport, freight, lorry, unspecified {RER}| market for transport, freight, lorry, unspecified | APOS, U	Benefici - Waste plastic, mixture {RoW}| treatment of waste plastic, mixture, sanitary landfill | APOS, U	Totale		Categoria d'impatto	Unità	Cement, limestone 6-20% {RoW}| cement production, limestone 6-20% | Cut-off, U	Sand 0/2 mm, wet and dry quarry, production mix, at plant, undried RER S -	T. Cemento_ Transport, freight, lorry, unspecified {RER}| market for transport, freight, lorry, unspecified | APOS, U	T. Sabbia_ Transport, freight, lorry, unspecified {RER}| market for transport, freight, lorry, unspecified | APOS, U	T. HP _ Transport, freight, lorry, unspecified {RER}| market for transport, freight, lorry, unspecified | APOS, U	Conveyor belt {GLO}| market for | APOS, U	Industrial machine, heavy, unspecified {RoW}| market for industrial machine, heavy, unspecified | APOS, U	Packing, cement {RoW}| processing | APOS, U	Rock crushing {RER}| processing | APOS, U	Electricity, medium voltage {IT}| market for | APOS, U	A4_ Transport, freight, lorry, unspecified {RER}| market for transport, freight, lorry, unspecified | APOS, U	A5 - Tap water {Europe without Switzerland}| market for | APOS, U	A5 - Electricity grid mix, AC, consumption mix, at consumer, 230V IT S	Benefici - Transport, freight, lorry, unspecified {RER}| market for transport, freight, lorry, unspecified | APOS, U	Benefici - Waste plastic, mixture {RoW}| treatment of waste plastic, mixture, sanitary landfill | APOS, U	Totale
	Climate change	kg CO2 eq	0.333981	0.0016695	0.00357402	0	0.00595669	4.25953e-05	1.60247e-05	0.00801795	9.76159e-05	0.0137938	0.00943805	0.000104639	0.0427702	-0.000277979	-0.0351828	0.384002		Climate change	kg CO2 eq	0.333981	0.0016695	0.00357402	0	0.00595669	4.25953e-05	1.60247e-05	0.00801795	9.76159e-05	0.0137938	0.0943805	0.000104639	0.0427702	-0.000277979	-0.0351828	0.468944
	Ozone depletion	kg CFC11 eq	1.13597e-08	1.9847e-10	8.20615e-10	0	1.36769e-09	2.40923e-12	1.03759e-12	4.23056e-10	8.87467e-12	1.91019e-09	2.16703e-09	9.37867e-12	3.75595e-10	-6.38256e-11	-9.90693e-10	1.75896e-08		Ozone depletion	kg CFC11 eq	1.13597e-08	1.9847e-10	8.20615e-10	0	1.36769e-09	2.40923e-12	1.03759e-12	4.23056e-10	8.87467e-12	1.91019e-09	2.16703e-08	9.37867e-12	3.75595e-10	-6.38256e-11	-9.90693e-10	3.70929e-08
	Ionising radiation	kBq U-235 eq	0.00698221	0.000313714	0.000284624	0	0.000474374	2.43097e-06	1.09926e-06	0.000486377	5.00513e-05	0.0015694	0.000751619	3.50137e-05	0.00169879	-2.21374e-05	-0.000380588	0.012247		Ionising radiation	kBq U-235 eq	0.00698221	0.000313714	0.000284624	0	0.000474374	2.43097e-06	1.09926e-06	0.000486377	5.00513e-05	0.0015694	0.00751619	3.50137e-05	0.00169879	-2.21374e-05	-0.000380588	0.0190115
	Photochemical ozone formation	kg NMVOC eq	0.000797007	1.17888e-05	2.27668e-05	0	3.79446e-05	1.60315e-07	7.20811e-08	3.02534e-05	2.26761e-07	2.92679e-05	6.01212e-05	3.23915e-07	5.92739e-05	-1.77075e-06	-3.73979e-05	0.00101004		Photochemical ozone formation	kg NMVOC eq	0.000797007	1.17888e-05	2.27668e-05	0	3.79446e-05	1.60315e-07	7.20811e-08	3.02534e-05	2.26761e-07	2.92679e-05	0.000601212	3.23915e-07	5.92739e-05	-1.77075e-06	-3.73979e-05	0.00155113
	Particulate matter	disease inc.	6.91278e-09	1.79077e-10	3.23241e-10	0	5.38735e-10	3.39854e-12	1.42359e-12	1.95929e-09	1.86071e-12	2.44889e-10	8.53596e-10	5.35616e-12	8.61566e-10	-2.5141e-11	-5.29079e-10	1.1331e-08		Particulate matter	disease inc.	6.91278e-09	1.79077e-10	3.23241e-10	0	5.38735e-10	3.39854e-12	1.42359e-12	1.95929e-09	1.86071e-12	2.44889e-10	8.53596e-09	5.35616e-12	8.61566e-10	-2.5141e-11	-5.29079e-10	1.90134e-08
	Human toxicity, non-cancer	CTUh	2.55769e-09	6.13525e-12	5.22336e-11	0	8.70559e-11	3.37519e-12	1.94015e-12	1.64483e-10	1.64728e-12	7.86455e-11	1.37935e-10	6.06334e-12	6.37921e-11	-4.06261e-12	-7.31707e-11	3.08377e-09		Human toxicity, non-cancer	CTUh	2.55769e-09	6.13525e-12	5.22336e-11	0	8.70559e-11	3.37519e-12	1.94015e-12	1.64483e-10	1.64728e-12	7.86455e-11	1.37935e-09	6.06334e-12	6.37921e-11	-4.06261e-12	-7.31707e-11	4.32518e-09
	Human toxicity, cancer	CTUh	6.65378e-11	1.06785e-13	1.42809e-12	0	2.38014e-12	2.5824e-13	1.0341e-13	1.54242e-11	5.49412e-14	2.78301e-12	3.7712e-12	2.3912e-13	3.71755e-12	-1.11073e-13	-2.06905e-12	9.46243e-11		Human toxicity, cancer	CTUh	6.65378e-11	1.06785e-13	1.42809e-12	0	2.38014e-12	2.5824e-13	1.0341e-13	1.54242e-11	5.49412e-14	2.78301e-12	3.7712e-11	2.3912e-13	3.71755e-12	-1.11073e-13	-2.06905e-12	1.28565e-10
	Acidification	mol H+ eq	0.000993823	1.60255e-05	2.02544e-05	0	3.37574e-05	1.87976e-07	1.26133e-07	3.07567e-05	5.1849e-07	6.39752e-05	5.34868e-05	5.77076e-07	0.000107222	-1.57535e-06	-2.91998e-05	0.00128994		Acidification	mol H+ eq	0.000993823	1.60255e-05	2.02544e-05	0	3.37574e-05	1.87976e-07	1.26133e-07	3.07567e-05	5.1849e-07	6.39752e-05	0.000534868	5.77076e-07	0.000107222	-1.57535e-06	-2.91998e-05	0.00177132
	Eutrophication, freshwater	kg P eq	4.20676e-05	3.73817e-10	2.6806e-07	0	4.46766e-07	2.32083e-08	1.44762e-08	1.87331e-06	9.14187e-08	3.56998e-06	7.07876e-07	7.31361e-08	2.02095e-09	-2.08491e-08	-5.8344e-07	4.85339e-05		Eutrophication, freshwater	kg P eq	4.20676e-05	3.73817e-10	2.6806e-07	0	4.46766e-07	2.32083e-08	1.44762e-08	1.87331e-06	9.14187e-08	3.56998e-06	7.07876e-06	7.31361e-08	2.02095e-09	-2.08491e-08	-5.8344e-07	5.49048e-05
	Eutrophication, marine	kg N eq	0.000283873	4.00637e-06	7.30762e-06	0	1.21794e-05	4.25411e-08	1.96117e-08	1.37252e-05	9.18176e-08	1.00239e-05	1.92975e-05	1.12041e-07	1.90314e-05	-5.68371e-07	-0.000641777	-0.000272634		Eutrophication, marine	kg N eq	0.000283873	4.00637e-06	7.30762e-06	0	1.21794e-05	4.25411e-08	1.96117e-08	1.37252e-05	9.18176e-08	1.00239e-05	0.000192975	1.12041e-07	1.90314e-05	-5.68371e-07	-0.000641777	-9.89564e-05
	Eutrophication, terrestrial	mol N eq	0.00321064	4.38336e-05	7.98747e-05	0	0.000133124	4.16343e-07	2.05008e-07	8.88318e-05	8.1649e-07	0.000110331	0.000210928	1.05028e-06	0.000209191	-6.21248e-06	-0.00010502	0.00397801		Eutrophication, terrestrial	mol N eq	0.00321064	4.38336e-05	7.98747e-05	0	0.000133124	4.16343e-07	2.05008e-07	8.88318e-05	8.1649e-07	0.000110331	0.00210928	1.05028e-06	0.000209191	-6.21248e-06	-0.00010502	0.00587637
	Ecotoxicity, freshwater	CTUe	4.60969	0.00644801	0.0443323	0	0.0738871	0.00145446	0.00105349	2.21899	0.00142258	0.2143	0.11707	0.00198274	0.168116	-0.00344807	-0.162645	7.29265		Ecotoxicity, freshwater	CTUe	4.60969	0.00644801	0.0443323	0	0.0738871	0.00145446	0.00105349	2.21899	0.00142258	0.2143	1.1707	0.00198274	0.168116	-0.00344807	-0.162645	8.34628
	Land use	Pt	1.02996	0	0.0628542	0	0.104757	0.00112114	0.000676069	1.21994	0.00158743	0.340344	0.165982	0.00164087	0.0032731	-0.00488866	-0.192867	2.73438		Land use	Pt	1.02996	0	0.0628542	0	0.104757	0.00112114	0.000676069	1.21994	0.00158743	0.340344	1.65982	0.00164087	0.0032731	-0.00488866	-0.192867	4.22822
	Water use	m3 depriv.	0.0155889	0.000121471	0.000180976	0	0.000301626	1.86864e-05	7.06333e-06	0.00541803	2.78076e-05	0.0100199	0.00047791	0.0125001	0.0286051	-1.40759e-05	-0.00326493	0.0699885		Water use	m3 depriv.	0.0155889	0.000121471	0.000180976	0	0.000301626	1.86864e-05	7.06333e-06	0.00541803	2.78076e-05	0.0100199	0.00477909	0.0125001	0.0286051	-1.40759e-05	-0.00326493	0.0742897
	Resource use, fossils	MJ	1.55101	0.0285655	0.0544854	0	0.090809	0.000408843	0.000159496	0.0681011	0.00192554	0.187158	0.143882	0.00167952	0.595339	-0.00423775	-0.0767668	2.64252		Resource use, fossils	MJ	1.55101	0.0285655	0.0544854	0	0.090809	0.000408843	0.000159496	0.0681011	0.00192554	0.187158	1.43882	0.00167952	0.595339	-0.00423775	-0.0767668	3.93746
	Resource use, minerals and metals	kg Sb eq	2.31856e-05	4.94097e-11	8.37666e-08	0	1.39611e-07	1.5435e-09	8.13928e-10	7.73167e-08	4.27784e-10	3.94865e-08	2.21206e-07	2.98389e-09	3.73648e-09	-6.51518e-09	-3.92285e-08	2.37108e-05		Resource use, minerals and metals	kg Sb eq	2.31856e-05	4.94097e-11	8.37666e-08	0	1.39611e-07	1.5435e-09	8.13928e-10	7.73167e-08	4.27784e-10	3.94865e-08	2.21206e-06	2.98389e-09	3.73648e-09	-6.51518e-09	-3.92285e-08	2.57017e-05
	Climate change - Fossil	kg CO2 eq	0.330701	0.00168871	0.00357078	0	0.00595131	4.24758e-05	1.59886e-05	0.00440846	9.41273e-05	0.0125335	0.00942952	0.000102113	0.0428314	-0.000277728	-0.0351616	0.37593		Climate change - Fossil	kg CO2 eq	0.330701	0.00168871	0.00357078	0	0.00595131	4.24758e-05	1.59886e-05	0.00440846	9.41273e-05	0.0125335	0.0942952	0.000102113	0.0428314	-0.000277728	-0.0351616	0.460796
	Climate change - Biogenic	kg CO2 eq	0.00317501	-1.92114e-05	1.83661e-06	0	3.06102e-06	1.25274e-08	-7.11704e-09	0.00358303	3.2425e-06	0.00124799	4.85002e-06	2.33634e-06	-6.12064e-05	-1.42848e-07	-1.91567e-05	0.00792163		Climate change - Biogenic	kg CO2 eq	0.00317501	-1.92114e-05	1.83661e-06	0	3.06102e-06	1.25274e-08	-7.11704e-09	0.00358303	3.2425e-06	0.00124799	4.85002e-05	2.33634e-06	-6.12064e-05	-1.42848e-07	-1.91567e-05	0.00796528
	Climate change - Land use and LU change	kg CO2 eq	0.000105076	0	1.39574e-06	0	2.32624e-06	1.07024e-07	4.31495e-08	2.64615e-05	2.46066e-07	1.22948e-05	3.6858e-06	1.90093e-07	0	-1.08558e-07	-2.03779e-06	0.00014968		Climate change - Land use and LU change	kg CO2 eq	0.000105076	0	1.39574e-06	0	2.32624e-06	1.07024e-07	4.31495e-08	2.64615e-05	2.46066e-07	1.22948e-05	3.6858e-05	1.90093e-07	0	-1.08558e-07	-2.03779e-06	0.000182852
	Human toxicity, non-cancer - organics	CTUh	3.75683e-11	6.23339e-14	5.90864e-12	0	9.84773e-12	5.95903e-14	5.63053e-14	1.6384e-11	1.72338e-14	2.65288e-12	1.56032e-11	3.05862e-14	3.42499e-13	-4.59561e-13	-3.5689e-11	5.23848e-11		Human toxicity, non-cancer - organics	CTUh	3.75683e-11	6.23339e-14	5.90864e-12	0	9.84773e-12	5.95903e-14	5.63053e-14	1.6384e-11	1.72338e-14	2.65288e-12	1.56032e-10	3.05862e-14	3.42499e-13	-4.59561e-13	-3.5689e-11	1.92813e-10
	Human toxicity, non-cancer - inorganics	CTUh	3.84349e-10	2.04711e-12	1.00641e-11	0	1.67734e-11	4.65776e-13	1.78073e-13	5.02066e-11	1.32424e-13	1.13768e-11	2.65766e-11	5.46717e-13	2.16605e-11	-7.82761e-13	-2.44357e-11	4.99159e-10		Human toxicity, non-cancer - inorganics	CTUh	3.84349e-10	2.04711e-12	1.00641e-11	0	1.67734e-11	4.65776e-13	1.78073e-13	5.02066e-11	1.32424e-13	1.13768e-11	2.65766e-10	5.46717e-13	2.16605e-11	-7.82761e-13	-2.44357e-11	7.38348e-10
	Human toxicity, non-cancer - metals	CTUh	2.14731e-09	4.02581e-12	3.63706e-11	0	6.06176e-11	2.85397e-12	1.70737e-12	9.84054e-11	1.50451e-12	6.60075e-11	9.60453e-11	5.49466e-12	4.1789e-11	-2.82882e-12	-4.75861e-11	2.51171e-09		Human toxicity, non-cancer - metals	CTUh	2.14731e-09	4.02581e-12	3.63706e-11	0	6.06176e-11	2.85397e-12	1.70737e-12	9.84054e-11	1.50451e-12	6.60075e-11	9.60453e-10	5.49466e-12	4.1789e-11	-2.82882e-12	-4.75861e-11	3.37612e-09
	Human toxicity, cancer - organics	CTUh	3.3895e-11	5.22903e-14	8.40716e-13	0	1.40119e-12	6.84336e-14	2.63517e-14	1.30153e-11	1.7205e-14	1.09191e-12	2.22011e-12	8.08595e-14	2.09663e-12	-6.53891e-14	-7.11621e-13	5.4029e-11		Human toxicity, cancer - organics	CTUh	3.3895e-11	5.22903e-14	8.40716e-13	0	1.40119e-12	6.84336e-14	2.63517e-14	1.30153e-11	1.7205e-14	1.09191e-12	2.22011e-11	8.08595e-14	2.09663e-12	-6.53891e-14	-7.11621e-13	7.401e-11
	Human toxicity, cancer - inorganics	CTUh	0	0	7.28961e-21	0	1.21493e-20	2.18973e-22	8.35363e-23	4.25056e-20	7.773e-22	2.52748e-20	1.925e-20	4.53414e-22	0	-5.66969e-22	-9.34458e-21	9.8091e-20		Human toxicity, cancer - inorganics	CTUh	0	0	7.28961e-21	0	1.21493e-20	2.18973e-22	8.35363e-23	4.25056e-20	7.773e-22	2.52748e-20	1.925e-19	4.53414e-22	0	-5.66969e-22	-9.34458e-21	2.71341e-19
	Human toxicity, cancer - metals	CTUh	3.26428e-11	5.44942e-14	5.87369e-13	0	9.78948e-13	1.89807e-13	7.70585e-14	2.40887e-12	3.77362e-14	1.6911e-12	1.55109e-12	1.5826e-13	1.62092e-12	-4.56842e-14	-1.35743e-12	4.05954e-11		Human toxicity, cancer - metals	CTUh	3.26428e-11	5.44942e-14	5.87369e-13	0	9.78948e-13	1.89807e-13	7.70585e-14	2.40887e-12	3.77362e-14	1.6911e-12	1.55109e-11	1.5826e-13	1.62092e-12	-4.56842e-14	-1.35743e-12	5.45551e-11
	Ecotoxicity, freshwater - organics	CTUe	0.0413495	4.95044e-05	0.00325729	0	0.00542881	1.46986e-05	8.96591e-06	0.00681239	9.67341e-06	0.0022292	0.00860165	3.40852e-05	0.000426527	-0.000253345	-0.00424534	0.0637236		Ecotoxicity, freshwater - organics	CTUe	0.0413495	4.95044e-05	0.00325729	0	0.00542881	1.46986e-05	8.96591e-06	0.00681239	9.67341e-06	0.0022292	0.0860165	3.40852e-05	0.000426527	-0.000253345	-0.00424534	0.141139
	Ecotoxicity, freshwater - inorganics	CTUe	0.267384	0.00180863	0.0114607	0	0.0191012	0.00011231	8.2116e-05	0.0158622	7.68898e-05	0.0130356	0.0302647	0.000176803	0.13538	-0.000891388	-0.109963	0.383891		Ecotoxicity, freshwater - inorganics	CTUe	0.267384	0.00180863	0.0114607	0	0.0191012	0.00011231	8.2116e-05	0.0158622	7.68898e-05	0.0130356	0.302647	0.000176803	0.13538	-0.000891388	-0.109963	0.656274
	Ecotoxicity, freshwater - metals	CTUe	4.30095	0.00458988	0.0296143	0	0.0493572	0.00132745	0.000962412	2.19631	0.00133601	0.199035	0.0782037	0.00177185	0.0323089	-0.00230333	-0.048437	6.84503		Ecotoxicity, freshwater - metals	CTUe	4.30095	0.00458988	0.0296143	0	0.0493572	0.00132745	0.000962412	2.19631	0.00133601	0.199035	0.782037	0.00177185	0.0323089	-0.00230333	-0.048437	7.54886
	Calculation:	Analizza
	Results:	Valutazione dell'impatto								HP (SB) - A
	Product:	1 l 0. HP - Mortar {Europe without Switzerland}| production | APOS, U - A1-A5 (del progetto							Cemento	60																			HP (SB) - A
	Metodo:	EN 15804 +A2 Method V1.00 / EF 3.0 normalization and weighting set							sabbia	0																		Cemento	60
	Indicatore:	Caratterizzazione								-																		sabbia	0
	Skip categories:	Mai							Hp	0																			-
	Esclude processi di infrastrutture:	No							A4	50																		Hp	0
	Esclude le emissioni di lungo termine:	No								-																		A4	500
	Sorted on item:	Categoria d'impatto																											-																	1 km
	Sort order:	Ascendente
	1 l 0. HP - Mortar {Europe without Switzerland}| production | APOS, U - A1-A5 (del progetto		A1		A2			A3					A4	A5		BENEFICI		TOT		1 l 0. HP - Mortar {Europe without Switzerland}| production | APOS, U - A1-A5 (del progetto		A1		A2			A3					A4	A5		BENEFICI		TOT
	Categoria d'impatto	Unità	Cement, limestone 6-20% {RoW}| cement production, limestone 6-20% | Cut-off, U	Sand 0/2 mm, wet and dry quarry, production mix, at plant, undried RER S -	T. Cemento_ Transport, freight, lorry, unspecified {RER}| market for transport, freight, lorry, unspecified | APOS, U	T. Sabbia_ Transport, freight, lorry, unspecified {RER}| market for transport, freight, lorry, unspecified | APOS, U	T. HP _ Transport, freight, lorry, unspecified {RER}| market for transport, freight, lorry, unspecified | APOS, U	Conveyor belt {GLO}| market for | APOS, U	Industrial machine, heavy, unspecified {RoW}| market for industrial machine, heavy, unspecified | APOS, U	Packing, cement {RoW}| processing | APOS, U	Rock crushing {RER}| processing | APOS, U	Electricity, medium voltage {IT}| market for | APOS, U	A4_ Transport, freight, lorry, unspecified {RER}| market for transport, freight, lorry, unspecified | APOS, U	A5 - Tap water {Europe without Switzerland}| market for | APOS, U	A5 - Electricity grid mix, AC, consumption mix, at consumer, 230V IT S	Benefici - Transport, freight, lorry, unspecified {RER}| market for transport, freight, lorry, unspecified | APOS, U	Benefici - Waste plastic, mixture {RoW}| treatment of waste plastic, mixture, sanitary landfill | APOS, U	Totale		Categoria d'impatto	Unità	Cement, limestone 6-20% {RoW}| cement production, limestone 6-20% | Cut-off, U	Sand 0/2 mm, wet and dry quarry, production mix, at plant, undried RER S -	T. Cemento_ Transport, freight, lorry, unspecified {RER}| market for transport, freight, lorry, unspecified | APOS, U	T. Sabbia_ Transport, freight, lorry, unspecified {RER}| market for transport, freight, lorry, unspecified | APOS, U	T. HP _ Transport, freight, lorry, unspecified {RER}| market for transport, freight, lorry, unspecified | APOS, U	Conveyor belt {GLO}| market for | APOS, U	Industrial machine, heavy, unspecified {RoW}| market for industrial machine, heavy, unspecified | APOS, U	Packing, cement {RoW}| processing | APOS, U	Rock crushing {RER}| processing | APOS, U	Electricity, medium voltage {IT}| market for | APOS, U	A4_ Transport, freight, lorry, unspecified {RER}| market for transport, freight, lorry, unspecified | APOS, U	A5 - Tap water {Europe without Switzerland}| market for | APOS, U	A5 - Electricity grid mix, AC, consumption mix, at consumer, 230V IT S	Benefici - Transport, freight, lorry, unspecified {RER}| market for transport, freight, lorry, unspecified | APOS, U	Benefici - Waste plastic, mixture {RoW}| treatment of waste plastic, mixture, sanitary landfill | APOS, U	Totale
	Climate change	kg CO2 eq	0.333981	0.0016695	0.00357402	0	0	4.25953e-05	1.60247e-05	0.00801795	9.76159e-05	0.0137938	0.00943805	0.000104639	0.0427702	-0.000277979	-0.0351828	0.378045		Climate change	kg CO2 eq	0.333981	0.0016695	0.00357402	0	0	4.25953e-05	1.60247e-05	0.00801795	9.76159e-05	0.0137938	0.0943805	0.000104639	0.0427702	-0.000277979	-0.0351828	0.462987
	Ozone depletion	kg CFC11 eq	1.13597e-08	1.9847e-10	8.20615e-10	0	0	2.40923e-12	1.03759e-12	4.23056e-10	8.87467e-12	1.91019e-09	2.16703e-09	9.37867e-12	3.75595e-10	-6.38256e-11	-9.90693e-10	1.62219e-08		Ozone depletion	kg CFC11 eq	1.13597e-08	1.9847e-10	8.20615e-10	0	0	2.40923e-12	1.03759e-12	4.23056e-10	8.87467e-12	1.91019e-09	2.16703e-08	9.37867e-12	3.75595e-10	-6.38256e-11	-9.90693e-10	3.57252e-08
	Ionising radiation	kBq U-235 eq	0.00698221	0.000313714	0.000284624	0	0	2.43097e-06	1.09926e-06	0.000486377	5.00513e-05	0.0015694	0.000751619	3.50137e-05	0.00169879	-2.21374e-05	-0.000380588	0.0117726		Ionising radiation	kBq U-235 eq	0.00698221	0.000313714	0.000284624	0	0	2.43097e-06	1.09926e-06	0.000486377	5.00513e-05	0.0015694	0.00751619	3.50137e-05	0.00169879	-2.21374e-05	-0.000380588	0.0185372
	Photochemical ozone formation	kg NMVOC eq	0.000797007	1.17888e-05	2.27668e-05	0	0	1.60315e-07	7.20811e-08	3.02534e-05	2.26761e-07	2.92679e-05	6.01212e-05	3.23915e-07	5.92739e-05	-1.77075e-06	-3.73979e-05	0.000972094		Photochemical ozone formation	kg NMVOC eq	0.000797007	1.17888e-05	2.27668e-05	0	0	1.60315e-07	7.20811e-08	3.02534e-05	2.26761e-07	2.92679e-05	0.000601212	3.23915e-07	5.92739e-05	-1.77075e-06	-3.73979e-05	0.00151318
	Particulate matter	disease inc.	6.91278e-09	1.79077e-10	3.23241e-10	0	0	3.39854e-12	1.42359e-12	1.95929e-09	1.86071e-12	2.44889e-10	8.53596e-10	5.35616e-12	8.61566e-10	-2.5141e-11	-5.29079e-10	1.07923e-08		Particulate matter	disease inc.	6.91278e-09	1.79077e-10	3.23241e-10	0	0	3.39854e-12	1.42359e-12	1.95929e-09	1.86071e-12	2.44889e-10	8.53596e-09	5.35616e-12	8.61566e-10	-2.5141e-11	-5.29079e-10	1.84746e-08
	Human toxicity, non-cancer	CTUh	2.55769e-09	6.13525e-12	5.22336e-11	0	0	3.37519e-12	1.94015e-12	1.64483e-10	1.64728e-12	7.86455e-11	1.37935e-10	6.06334e-12	6.37921e-11	-4.06261e-12	-7.31707e-11	2.99671e-09		Human toxicity, non-cancer	CTUh	2.55769e-09	6.13525e-12	5.22336e-11	0	0	3.37519e-12	1.94015e-12	1.64483e-10	1.64728e-12	7.86455e-11	1.37935e-09	6.06334e-12	6.37921e-11	-4.06261e-12	-7.31707e-11	4.23813e-09
[truncated: 250 more rows]

## Sheet: HP (CED)
Calculation:	Analizza								HP (SB) - A														Calculation:	Analizza								HP (SB) - A												Calculation:	Analizza
[truncated: 121 more rows]
[truncated: 13 more columns]
